# Supplementary material for: Molecular Mechanisms of Chlorophyll Deficiency in Ilex × attenuata ‘Sunny Foster’ Mutant
Source: MDPI journal article supplement (doi:10.3390/plants13101284), 2024-05-07
Supplement: s1 [file s1]

## Supplementary Tables

**Table S1** Comparative analysis of epidermal features of YT and WT.

| Histological parameters                       | YT            | WT           |
|-----------------------------------------------|---------------|--------------|
| Stomata length (um)                           | 33.65±1.76a   | 35.06±0.73a  |
| Stomata width (um)                            | 31.08±2.52a   | 28.67±1.52a  |
| Stomata density (per um <sup>2</sup> )        | 317.70±13.30b | 358.14±5.79a |
| Closed stomata density (per um <sup>2</sup> ) | 240.55±5.30a  | 5.14±0.72b   |

Note: The values represented the mean±SD. Different lowercase letters indicate significant differences at  $P<0.05$ .

**Table S2** Summary of the sequencing and mapping results between YT and WT.

| Samples | Total reads | Clean reads | Q20    | Q30    | GC Content | Mapping rate |
|---------|-------------|-------------|--------|--------|------------|--------------|
| YT-1    | 44,070,410  | 42,578,268  | 96.77% | 91.42% | 44.33%     | 68.08%       |
| YT-2    | 47,481,470  | 46,073,680  | 96.80% | 91.39% | 44.08%     | 67.57%       |
| YT-3    | 45,437,032  | 44,412,792  | 96.94% | 91.75% | 44.30%     | 67.94%       |
| WT-1    | 43,600,624  | 42,072,156  | 96.98% | 91.88% | 44.52%     | 67.44%       |
| WT-2    | 43,523,698  | 42,160,692  | 97.17% | 92.24% | 44.49%     | 68.32%       |
| WT-3    | 44,402,320  | 43,096,068  | 96.87% | 91.65% | 44.37%     | 67.81%       |
| Total   | 268,515,554 | 260,393,656 | 96.98% | 91.88% | 44.35%     | 67.86%       |

**Table S9** List of primers used for qRT-PCR analysis.

| Gene ID                       | Forward primer           | Reverse primer            |
|-------------------------------|--------------------------|---------------------------|
| <i>GLK1(Ila20G011400)</i>     | ATGAGCCTTTGGGTAGCACC     | GTCTGCTGGTGGTGGATGA<br>A  |
| <i>PORA(Ila17G009680)</i>     | CCCATTGTTTCAGGGCTCTGT    | CACCTTCCTGGCCTTCTCTG      |
| <i>HEMD(Ila09G014230)</i>     | ACTGGTATTTGGAAGGGGC<br>G | TGAATCGGTGTCAGCTGCAT      |
| <i>SGR(Ila05G008020)</i>      | ATTGTTATGTGAGCGGGCCA     | TTAGTGGCCCCCAACATTCC      |
| <i>NCED1(Ila20G005950)</i>    | CCAGTGTCCAAATTGCAGG<br>C | GTAGCTTGCTGACCCGTTCT      |
| <i>CYP707A1(Ila10G003260)</i> | TTCAATGGGGTGGCCTCTTG     | GCCTGAACCAGCTTCCTCAT      |
| <i>ANR(Ila16G002080)</i>      | TTCAATGCCCCCATAGCAGG     | TCGCCTGAGCTGATCGTTAC      |
| <i>LHCA(Ila16G017490)</i>     | CATTGCTTCCACTGCGCTTT     | TTGCCCATCTGCCATGGATT      |
| <i>PsbC(Ila0G015340)</i>      | GGCCGGAGCAATGAACCTA<br>T | GTCTCAGGTCCCAGAAGTG<br>C  |
| <i>LHCB(Ila15G017050)</i>     | CTTGGGGCTCTTGATGTGT      | CCAATGGGTCTGAAGCTTCC<br>T |
| <i>petF(Ila17G015180)</i>     | GGCGAAGAGACCGAGTTTG<br>A | GCAAGTGAGCAGGTAACCC<br>T  |
| <i>DVR(Ila11G009290)</i>      | TGTCTCTTGCTTGTAGCC       | CCTGTCCTCCCAAGCTCTTG      |
| <i>Actin</i>                  | CCACCTACAACCTCCATCAT     | TTCCTTGCTCATACGATCA       |
