# Supplementary material for: Molecular Mechanisms of Chlorophyll Deficiency in Ilex × attenuata ‘Sunny Foster’ Mutant
Source: Plants (Basel). 2024 May 7;13(10):1284. doi: 10.3390/plants13101284 (PMC11124982; doi:10.3390/plants13101284)
Supplement: Supplementary file 1 [file plants-13-01284-s001.zip]

Archive with 8 entries (8 files):
- Table S3 Expression levels and annotation of total gene..xls
- Table S4 KEGG enrichment between YT and WT..xls
- Table S5 DEGs discussed in the paper..xls
- Table S6 GSEA enrichment pathway in YT..xls
- Table S7 Genes with high GSEA enrichment in porphorin matabolism in YT..xls
- Table S8 Differential expression of TFs..xls
- Supplementary Figures (S1-S3).pdf
- Supplementary Tables (S1, S2, S9).pdf
