# Supplementary material for: Molecular Mechanisms of Chlorophyll Deficiency in Ilex × attenuata ‘Sunny Foster’ Mutant
Source: Plants (Basel). 2024 May 7;13(10):1284. doi: 10.3390/plants13101284 (PMC11124982; doi:10.3390/plants13101284)
Supplement: Supplementary file 1 [file plants-13-01284-s001.zip › Table S3 Expression levels and annotation of total gene..xls]

gene_id	WT_1_count	WT_2_count	WT_3_count	YT_1_count	YT_2_count	YT_3_count	WT_1_fpkm	WT_2_fpkm	WT_3_fpkm	YT_1_fpkm	YT_2_fpkm	YT_3_fpkm	YTvsWT_YT	YTvsWT_WT	YTvsWT_log2FoldChange	YTvsWT_pvalue	YTvsWT_padj	gene_name	gene_chr	gene_start	gene_end	gene_strand	gene_length	gene_biotype	gene_description	tf_family
Ila04G005210	160506	176506	126181	121526	135436	173688	7769.580017	8446.905054	5629.884502	5671.7199	5772.164386	8037.710478	140292.4081	157321.8124	-0.165281261	0.409671316	0.590626675	Ila04G005210	GWHBIST00000004	17022148	17026530	-	1923	protein_coding	- && sp|Q7X9A0|RCA1_LARTR Ribulose bisphosphate carboxylase/oxygenase activase 1, chloroplastic OS=Larrea tridentata OX=66636 GN=RCA1 PE=1 SV=1 && PF00004:ATPase family associated with various cellular activities (AAA)	AAA
Ila15G017070	93579	93181	79337	67171	62234	71248	8897.771823	8759.152727	6953.090581	6157.777292	5209.893914	6476.372419	65419.36864	90224.5974	-0.46380387	0.002147391	0.010909628	Ila15G017070	GWHBIST00000015	45376968	45377946	+	979	protein_coding	- && sp|P27493|CB22_TOBAC Chlorophyll a-b binding protein 21, chloroplastic OS=Nicotiana tabacum OX=4097 GN=CAB21 PE=2 SV=1 && PF00504:Chlorophyll A-B binding protein	-
Ila14G001730	63838	63246	44945	60616	67004	86265	2420.545954	2370.822232	1570.777577	2215.953452	2236.830572	3126.978958	69684.71085	58490.52126	0.252642359	0.227308448	0.398915932	Ila14G001730	GWHBIST00000014	1930647	1938404	+	2455	protein_coding	- && sp|P27141|CAHC_TOBAC Carbonic anhydrase, chloroplastic OS=Nicotiana tabacum OX=4097 PE=2 SV=1 && PF00484:Carbonic anhydrase	-
Ila09G001490	68595	83528	55611	36551	33965	44616	3617.706306	4355.16684	2703.340804	1858.572082	1577.141885	2249.509079	37577.04267	70565.48949	-0.909113269	8.00E-06	9.38E-05	Ila09G001490	GWHBIST00000009	1423748	1427445	-	1765	protein_coding	- && sp|Q944G9|ALFP2_ARATH Fructose-bisphosphate aldolase 2, chloroplastic OS=Arabidopsis thaliana OX=3702 GN=FBA2 PE=1 SV=2 && PF00274:Fructose-bisphosphate aldolase class-I	-
Ila19G011500	49987	47343	36724	59278	40281	55894	971.8259411	909.9532001	658.082954	1111.128421	689.4931539	1038.85008	50912.22294	45540.17118	0.160870969	0.454935686	0.63031621	Ila19G011500	GWHBIST00000019	28207485	28213701	-	4788	protein_coding	- && sp|Q9FNB0|CHLH_ARATH Magnesium-chelatase subunit ChlH, chloroplastic OS=Arabidopsis thaliana OX=3702 GN=CHLH PE=1 SV=1 && PF11965:Domain of unknown function (DUF3479)|PF02514:CobN/Magnesium Chelatase	-
Ila08G005260	39711	37594	29552	52658	57234	68708	3067.6749	2871.103932	2104.188467	3921.951051	3892.699763	5074.135829	58160.67816	36293.90768	0.680323296	0.000205498	0.001499831	Ila08G005260	GWHBIST00000008	11876657	11882473	-	1205	protein_coding	- && sp|Q9XF89|CB5_ARATH Chlorophyll a-b binding protein CP26, chloroplastic OS=Arabidopsis thaliana OX=3702 GN=LHCB5 PE=1 SV=1 && PF00504:Chlorophyll A-B binding protein	-
Ila10G000370	57817	61542	42524	36629	36114	47739	3311.980295	3485.263872	2245.254362	2023.00312	1821.403156	2614.338272	39303.55678	55026.53831	-0.485467217	0.017971801	0.060463168	Ila10G000370	GWHBIST00000010	325397	330839	+	1625	protein_coding	- && sp|P12859|G3PB_PEA Glyceraldehyde-3-phosphate dehydrogenase B, chloroplastic OS=Pisum sativum OX=3888 GN=GAPB PE=1 SV=2 && PF02800:Glyceraldehyde 3-phosphate dehydrogenase, C-terminal domain|PF00044:Glyceraldehyde 3-phosphate dehydrogenase, NAD binding domain	-
Ila07G000880	42560	42884	33121	39522	43316	51467	2149.620724	2141.34861	1541.923794	1924.590928	1926.224339	2485.108458	43728.60831	40256.84493	0.119348283	0.504139129	0.672156516	Ila07G000880	GWHBIST00000007	6478575	6482958	-	1843	protein_coding	- && sp|P25856|G3PA1_ARATH Glyceraldehyde-3-phosphate dehydrogenase GAPA1, chloroplastic OS=Arabidopsis thaliana OX=3702 GN=GAPA1 PE=1 SV=3 && PF00044:Glyceraldehyde 3-phosphate dehydrogenase, NAD binding domain|PF02800:Glyceraldehyde 3-phosphate dehydrogenase, C-terminal domain	-
Ila20G013650	38774	37169	27313	37720	43641	49866	2924.899865	2771.935631	1899.061589	2743.351018	2898.433831	3596.095376	42689.18534	35101.41403	0.282349522	0.142823939	0.287382549	Ila20G013650	GWHBIST00000020	27763040	27766852	-	1234	protein_coding	- && sp|Q7DM39|PSBP1_TOBAC Oxygen-evolving enhancer protein 2-1, chloroplastic OS=Nicotiana tabacum OX=4097 GN=PSBP1 PE=3 SV=2 && PF01789:PsbP	-
Ila0G013150	40314	39337	29053	40462	37690	43766	1966.813032	1897.318709	1306.463914	1903.241203	1618.943243	2041.269348	39751.47391	36944.46039	0.105654891	0.565233387	0.72209733	Ila0G013150	GWHBIST00000182	69035	74417	-	1908	protein_coding	- && sp|O24339|CATA_SOLAP Catalase OS=Soldanella alpina OX=66308 PE=2 SV=1 && PF00199:Catalase|PF06628:Catalase-related immune-responsive	Catalase
Ila07G010370	48021	57486	32028	35232	17804	37771	4461.172684	5279.730962	2742.501684	3155.690711	1456.242563	3354.537028	29892.62427	46841.54098	-0.648004674	0.035678979	0.102197465	Ila07G010370	GWHBIST00000007	25036703	25039476	-	1002	protein_coding	- && sp|Q9XGN4|GOLS1_AJURE Galactinol synthase 1 OS=Ajuga reptans OX=38596 GN=GOLS1 PE=1 SV=1 && PF01501:Glycosyl transferase family 8	Glyco_transf_8
Ila06G003780	37401	37053	29776	38296	39642	45716	1547.341781	1515.508171	1135.451641	1527.551117	1443.965761	1808.121184	40272.43687	35374.19228	0.187101109	0.255396263	0.432537664	Ila06G003780	GWHBIST00000006	3650311	3653371	-	2250	protein_coding	- && sp|Q40459|PSBO_TOBAC Oxygen-evolving enhancer protein 1, chloroplastic OS=Nicotiana tabacum OX=4097 GN=PSBO PE=2 SV=1 && PF01716:Manganese-stabilising protein / photosystem II polypeptide	-
Ila20G007430	25019	25919	18868	52407	44630	57483	1489.082482	1525.102092	1035.080015	3007.304517	2338.697194	3270.728577	50467.2486	23716.10064	1.089488129	1.79E-08	4.20E-07	Ila20G007430	GWHBIST00000020	8283931	8285996	-	1564	protein_coding	- && sp|P12062|CB26_PETSP Chlorophyll a-b binding protein 37, chloroplastic OS=Petunia sp. OX=4104 GN=CAB37 PE=3 SV=1 && PF00504:Chlorophyll A-B binding protein	-
Ila01G006940	41142	39694	28949	30096	26174	40748	887.9561059	846.9598653	575.8891719	626.2592821	497.3641709	840.753469	31727.41299	37322.70945	-0.234325052	0.30132682	0.482985274	Ila01G006940	GWHBIST00000001	8306394	8313812	+	4313	protein_coding	- && sp|O49954|GCSP_SOLTU Glycine dehydrogenase (decarboxylating), mitochondrial OS=Solanum tuberosum OX=4113 GN=GDCSP PE=2 SV=1 && PF02347:Glycine cleavage system P-protein	-
Ila17G002230	31561	38102	40640	30052	31700	25243	1925.226265	2297.791734	2284.988246	1767.436023	1702.505741	1472.069323	28241.55654	37190.57345	-0.397119908	0.003085731	0.014688739	Ila17G002230	GWHBIST00000017	2391974	2394113	-	1526	protein_coding	- && sp|P0CH04|UBI1P_PETCR Polyubiquitin OS=Petroselinum crispum OX=4043 GN=PCUBI4-1 PE=2 SV=1 && PF00240:Ubiquitin family	ubiquitin
Ila06G008090	36540	37501	25994	27369	29934	38846	2055.209511	2085.2699	1347.596645	1484.177308	1482.349505	2088.767667	31331.04191	34013.27887	-0.118500967	0.574511547	0.730035206	Ila06G008090	GWHBIST00000006	8396588	8399777	+	1655	protein_coding	- && sp|O04977|FENR1_TOBAC Ferredoxin--NADP reductase, leaf-type isozyme, chloroplastic OS=Nicotiana tabacum OX=4097 GN=PETH PE=2 SV=1 && PF00175:Oxidoreductase NAD-binding domain	NAD_binding_1
Ila17G007530	34023	31918	24017	30413	30773	41938	2515.546973	2333.067823	1636.732977	2167.995556	2003.216843	2964.311329	33642.01229	30576.61326	0.137839222	0.50812246	0.675525227	Ila17G007530	GWHBIST00000017	10959383	10961522	-	1259	protein_coding	- && sp|P27522|CB13_SOLLC Chlorophyll a-b binding protein 8, chloroplastic OS=Solanum lycopersicum OX=4081 GN=CAB8 PE=3 SV=1 && PF00504:Chlorophyll A-B binding protein	-
Ila15G007100	35244	32148	25362	25780	29663	37210	1035.584582	933.8695406	686.8835726	730.3358104	767.3857941	1045.240733	30168.62254	31513.65952	-0.062922872	0.75294998	0.85737127	Ila15G007100	GWHBIST00000015	8961867	8968182	+	3168	protein_coding	- && sp|O49954|GCSP_SOLTU Glycine dehydrogenase (decarboxylating), mitochondrial OS=Solanum tuberosum OX=4113 GN=GDCSP PE=2 SV=1 && PF02347:Glycine cleavage system P-protein	-
Ila19G012640	36322	34097	24361	27213	29745	32327	615.5250205	571.2470816	380.5137173	444.6227479	443.8009532	523.7181593	29048.13849	32239.49152	-0.150374209	0.433644332	0.611978951	Ila19G012640	GWHBIST00000019	29852578	29897244	-	5493	protein_coding	- && sp|Q9ZNZ7|GLTB1_ARATH Ferredoxin-dependent glutamate synthase 1, chloroplastic/mitochondrial OS=Arabidopsis thaliana OX=3702 GN=GLU1 PE=1 SV=3 && PF04898:Glutamate synthase central domain|PF00310:Glutamine amidotransferases class-II|PF01645:Conserved region in glutamate synthase|PF01493:GXGXG motif	GATase_2
Ila18G007100	33068	28504	24136	32544	31550	31119	1217.633016	1037.638706	819.168101	1155.363697	1022.836342	1095.444531	30991.24154	29105.3916	0.090583346	0.582241592	0.735698849	Ila18G007100	GWHBIST00000018	10498060	10505704	-	2528	protein_coding	- && sp|Q655S1|FTSH2_ORYSJ ATP-dependent zinc metalloprotease FTSH 2, chloroplastic OS=Oryza sativa subsp. japonica OX=39947 GN=FTSH2 PE=3 SV=1 && PF17862:AAA+ lid domain|PF01434:Peptidase family M41|PF00004:ATPase family associated with various cellular activities (AAA)	AAA
Ila17G020890	30314	30338	23748	26464	28863	33132	2672.174925	2643.872165	1929.513968	2249.139669	2240.06906	2792.065248	28793.97819	28652.75056	0.007101136	0.966902186	0.982781306	Ila17G020890	GWHBIST00000017	43370379	43372102	+	1056	protein_coding	- && sp|Q39654|PSAL_CUCSA Photosystem I reaction center subunit XI, chloroplastic OS=Cucumis sativus OX=3659 GN=PSAL PE=2 SV=1 && PF02605:Photosystem I reaction centre subunit XI	-
Ila17G018140	17745	20883	14752	35284	42156	37005	848.390132	987.0618365	650.0844186	1626.435023	1774.5053	1691.360896	37128.75758	18122.4311	1.034782958	6.51E-10	2.14E-08	Ila17G018140	GWHBIST00000017	40184120	40188800	-	1947	protein_coding	- && sp|Q9LHA8|HS704_ARATH Heat shock 70 kDa protein 4 OS=Arabidopsis thaliana OX=3702 GN=HSP70-4 PE=1 SV=1 && PF00012:Hsp70 protein	HSP70
Ila16G007990	23062	22962	17723	27488	31632	38465	1641.250155	1615.546238	1162.557114	1886.080626	1981.995958	2616.976492	31765.20475	21646.95762	0.553293477	0.003343504	0.015733666	Ila16G007990	GWHBIST00000016	13876401	13879042	-	1308	protein_coding	- && sp|P46486|PSAF_FLATR Photosystem I reaction center subunit III, chloroplastic OS=Flaveria trinervia OX=4227 GN=PSAF PE=2 SV=1 && PF02507:Photosystem I reaction centre subunit III	-
Ila16G025070	20639	26232	24183	21703	28559	22077	1054.44962	1324.952945	1138.79777	1069.045657	1284.631243	1078.284875	23416.45753	24004.8678	-0.035788771	0.801817424	0.888569557	Ila16G025070	GWHBIST00000016	53215457	53217982	+	1822	protein_coding	- && sp|A0A1D6F9Y9|C92C6_MAIZE Trimethyltridecatetraene synthase OS=Zea mays OX=4577 GN=CYP92C6 PE=1 SV=1 && PF00067:Cytochrome P450	p450
Ila03G001450	24434	22300	16833	23364	21853	26710	1577.302041	1423.170806	1001.569447	1454.141915	1242.023067	1648.353886	23460.50349	21611.12199	0.118467323	0.54028118	0.702928695	Ila03G001450	GWHBIST00000003	2095777	2099682	+	1442	protein_coding	- && sp|Q07473|CB4A_ARATH Chlorophyll a-b binding protein CP29.1, chloroplastic OS=Arabidopsis thaliana OX=3702 GN=LHCB4.1 PE=1 SV=1 && PF00504:Chlorophyll A-B binding protein	-
Ila10G004620	10809	13320	17696	21178	34872	31244	576.2710913	702.0651399	869.5922788	1088.593058	1636.878608	1592.444182	28232.46469	14044.11711	1.007376656	1.07E-06	1.60E-05	Ila10G004620	GWHBIST00000010	4953011	4956877	-	1746	protein_coding	- && sp|Q6VAF9|TBA4_GOSHI Tubulin alpha-4 chain OS=Gossypium hirsutum OX=3635 PE=2 SV=1 && PF03953:Tubulin C-terminal domain|PF00091:Tubulin/FtsZ family, GTPase domain	Tubulin
Ila20G000270	21466	21543	15102	20698	22394	24802	979.5046765	971.8370184	635.1687212	910.5904074	899.6743999	1081.92801	22094.68381	19759.4467	0.161171325	0.39424824	0.575890318	Ila20G000270	GWHBIST00000020	308192	311967	+	2040	protein_coding	- && sp|Q42961|PGKH_TOBAC Phosphoglycerate kinase, chloroplastic OS=Nicotiana tabacum OX=4097 PE=2 SV=1 && PF00162:Phosphoglycerate kinase	-
Ila05G015880	18559	19882	13614	20829	21566	31306	1559.194764	1651.344685	1054.218882	1687.149297	1595.194696	2514.372679	24052.05645	17695.57043	0.442778926	0.049433337	0.1306861	Ila05G015880	GWHBIST00000005	32565820	32566927	-	1108	protein_coding	- && sp|P00289|PLAS_SPIOL Plastocyanin, chloroplastic OS=Spinacia oleracea OX=3562 GN=PETE PE=1 SV=2 && PF00127:Copper binding proteins, plastocyanin/azurin family	-
Ila12G005360	18796	17762	12962	19193	23263	27715	1448.385133	1353.138825	920.6401003	1425.938466	1578.274875	2041.689885	22826.33736	16838.08997	0.438986734	0.033519225	0.097947105	Ila12G005360	GWHBIST00000012	23461544	23463385	+	1208	protein_coding	- && sp|Q9SQL2|CB24_PEA Chlorophyll a-b binding protein P4, chloroplastic OS=Pisum sativum OX=3888 GN=lhcA-P4 PE=1 SV=1 && PF00504:Chlorophyll A-B binding protein	-
Ila05G003950	19888	19109	16001	20369	19496	24006	821.7041414	780.5382539	609.3555039	811.3969524	709.1991083	948.2010647	20829.41031	18659.40284	0.158723805	0.344969401	0.52880734	Ila05G003950	GWHBIST00000005	16579425	16589288	-	2253	protein_coding	- && sp|Q9S7E9|GGT2_ARATH Glutamate--glyoxylate aminotransferase 2 OS=Arabidopsis thaliana OX=3702 GN=GGAT2 PE=1 SV=1 && PF00155:Aminotransferase class I and II	Aminotran_1_2
Ila12G008930	17560	15914	14735	21926	23806	20707	478.7916315	428.9762622	370.3151058	576.3957219	571.4875438	539.753535	21576.09691	16340.03397	0.401049411	0.002435133	0.012098443	Ila12G008930	GWHBIST00000012	27886379	27893728	-	3414	protein_coding	- && sp|P31542|CLPAB_SOLLC ATP-dependent Clp protease ATP-binding subunit ClpA homolog CD4B, chloroplastic OS=Solanum lycopersicum OX=4081 GN=CD4B PE=3 SV=1 && PF17871:AAA lid domain|PF00004:ATPase family associated with various cellular activities (AAA)|PF10431:C-terminal, D2-small domain, of ClpB protein|PF07724:AAA domain (Cdc48 subfamily)|PF02861:Clp amino terminal domain, pathogenicity islan…	Clp_N
Ila20G005990	17377	17200	13263	18960	18648	28315	844.2379151	826.1337524	593.9242659	888.1118891	797.6651391	1315.112452	21531.57932	16246.4722	0.406331582	0.062418219	0.156092671	Ila20G005990	GWHBIST00000020	6350215	6355487	-	1916	protein_coding	- && sp|P05414|GOX_SPIOL Peroxisomal (S)-2-hydroxy-acid oxidase OS=Spinacia oleracea OX=3562 PE=1 SV=1 && PF01070:FMN-dependent dehydrogenase	FMN_dh
Ila20G001140	12559	13949	12780	19528	23342	19930	446.0397829	489.7714632	418.3585389	668.6757927	729.885776	676.6780768	20368.80999	13291.39365	0.615899632	8.40E-08	1.70E-06	Ila20G001140	GWHBIST00000020	1045841	1049517	+	2621	protein_coding	- && sp|P36181|HSP80_SOLLC Heat shock cognate protein 80 OS=Solanum lycopersicum OX=4081 GN=HSC80 PE=2 SV=1 && PF00183:Hsp90 protein|PF02518:Histidine kinase-, DNA gyrase B-, and HSP90-like ATPase	HATPase_c
Ila13G010960	8013	6356	6739	25303	26382	27279	319.3065744	250.3966267	247.5183622	972.1292996	925.5901707	1039.195927	25691.80724	7148.962783	1.845535448	3.04E-38	5.03E-35	Ila13G010960	GWHBIST00000013	23620223	23625390	+	2336	protein_coding	- && sp|P08926|RUBA_PEA RuBisCO large subunit-binding protein subunit alpha, chloroplastic OS=Pisum sativum OX=3888 PE=1 SV=2 && PF00118:TCP-1/cpn60 chaperonin family	-
Ila17G007560	16426	14447	10427	17061	19277	21347	389.4637843	338.6451042	227.8735315	390.0129642	402.4139324	483.869651	18764.29578	14054.99131	0.416930058	0.040607006	0.112788051	Ila17G007560	GWHBIST00000017	10982422	10999202	+	3926	protein_coding	- && sp|P57997|IF2C_PHAVU Translation initiation factor IF-2, chloroplastic OS=Phaseolus vulgaris OX=3885 GN=IF2CP PE=2 SV=1 && PF00009:Elongation factor Tu GTP binding domain|PF11987:Translation-initiation factor 2	GTP_EFTU
Ila11G008410	17055	15557	12850	15009	16500	20738	1343.135424	1211.227713	932.7611642	1139.617571	1144.064011	1561.317481	17019.39411	15435.30748	0.140955945	0.454542462	0.63004998	Ila11G008410	GWHBIST00000011	25866532	25867713	-	1182	protein_coding	- && sp|P32869|PSAD_CUCSA Photosystem I reaction center subunit II, chloroplastic OS=Cucumis sativus OX=3659 GN=psaD PE=1 SV=1 && PF02531:PsaD	-
Ila03G005560	14854	14203	12180	16426	13881	20769	943.824727	892.1952077	713.3365357	1006.280483	776.5456405	1261.594509	16702.16084	13986.16254	0.256030725	0.195404767	0.359819753	Ila03G005560	GWHBIST00000003	11521418	11524945	+	1465	protein_coding	- && sp|Q6SJV8|CRD1_GOSHI Magnesium-protoporphyrin IX monomethyl ester [oxidative] cyclase, chloroplastic OS=Gossypium hirsutum OX=3635 GN=CRD1 PE=2 SV=2 && PF02915:Rubrerythrin	-
Ila08G013090	16117	15176	13494	14177	14670	18633	1154.94316	1075.141413	891.2845113	979.4900847	925.5605153	1276.484253	15476.62346	15183.94619	0.027546975	0.871339332	0.930438084	Ila08G013090	GWHBIST00000008	33278483	33281952	+	1299	protein_coding	- && sp|O22506|GLNA2_DAUCA Glutamine synthetase, chloroplastic OS=Daucus carota OX=4039 GN=GLN2 PE=2 SV=1 && PF03951:Glutamine synthetase, beta-Grasp domain|PF00120:Glutamine synthetase, catalytic domain	-
Ila08G007500	14555	19765	28301	10068	9814	9653	826.1405091	1109.099206	1480.617022	550.965258	490.4402013	523.7937195	9612.665714	20978.47315	-1.125928735	3.35E-08	7.36E-07	Ila08G007500	GWHBIST00000008	21927447	21930874	-	1640	protein_coding	- && sp|Q9MA41|CTL1_ARATH Chitinase-like protein 1 OS=Arabidopsis thaliana OX=3702 GN=CTL1 PE=1 SV=1 && PF00182:Chitinase class I	-
Ila06G014120	16603	13318	11157	17044	15083	17200	580.5826763	460.413854	359.603729	574.6300456	464.3693385	574.9925588	16089.39796	13962.16075	0.204599684	0.285371094	0.46568369	Ila06G014120	GWHBIST00000006	24543713	24562846	-	2662	protein_coding	- && sp|Q9LV93|AB5F_ARATH ABC transporter F family member 5 OS=Arabidopsis thaliana OX=3702 GN=ABCF5 PE=2 SV=1 && PF00005:ABC transporter|PF12848:ABC transporter	ABC_tran
Ila20G003640	18112	17860	14831	13141	10718	15235	2112.75469	2059.662145	1594.602161	1477.91814	1100.765267	1698.953122	12783.12841	17233.94305	-0.431024402	0.024062244	0.07623957	Ila20G003640	GWHBIST00000020	3470947	3472170	+	798	protein_coding	- && sp|P27489|CB23_SOLLC Chlorophyll a-b binding protein 13, chloroplastic OS=Solanum lycopersicum OX=4081 GN=CAB13 PE=1 SV=1 && PF00504:Chlorophyll A-B binding protein	-
Ila05G016040	16192	12981	11459	16768	15773	16654	711.6395815	564.0266413	464.200462	710.5263121	610.3405208	699.7363465	16026.4513	13799.78462	0.215824639	0.217286513	0.386930526	Ila05G016040	GWHBIST00000005	32720938	32723943	+	2118	protein_coding	- && sp|O82150|FTSH_TOBAC ATP-dependent zinc metalloprotease FTSH, chloroplastic OS=Nicotiana tabacum OX=4097 GN=FTSH PE=2 SV=2 && PF17862:AAA+ lid domain|PF01434:Peptidase family M41|PF00004:ATPase family associated with various cellular activities (AAA)	AAA
Ila17G000920	11260	11343	11192	17054	21260	17291	405.7883183	404.1298687	371.7646572	592.5523273	674.5633015	595.7136249	18018.88178	11430.24967	0.656692638	7.26E-09	1.88E-07	Ila17G000920	GWHBIST00000017	1067479	1071072	+	2583	protein_coding	- && sp|P36181|HSP80_SOLLC Heat shock cognate protein 80 OS=Solanum lycopersicum OX=4081 GN=HSC80 PE=2 SV=1 && PF02518:Histidine kinase-, DNA gyrase B-, and HSP90-like ATPase|PF00183:Hsp90 protein	HATPase_c
Ila16G020600	14013	14068	12776	14616	17191	15653	701.6770764	696.4186512	589.6581669	705.6250667	757.8890056	749.3074042	15404.80297	13837.96995	0.15478353	0.1975064	0.362595478	Ila16G020600	GWHBIST00000016	47231569	47237950	+	1859	protein_coding	- && sp|P93338|GAPN_NICPL NADP-dependent glyceraldehyde-3-phosphate dehydrogenase OS=Nicotiana plumbaginifolia OX=4092 GN=GAPN PE=2 SV=1 && PF00171:Aldehyde dehydrogenase family	Aldedh
Ila18G014170	15390	13388	11306	15998	14282	16966	1139.69567	980.1619741	771.7177832	1142.234492	931.1885077	1201.118935	15414.03052	13611.31809	0.179445695	0.312682401	0.495331477	Ila18G014170	GWHBIST00000018	35068298	35070432	+	1257	protein_coding	- && sp|P27524|CB4A_SOLLC Chlorophyll a-b binding protein CP24 10A, chloroplastic OS=Solanum lycopersicum OX=4081 GN=CAP10A PE=3 SV=1 && PF00504:Chlorophyll A-B binding protein	-
Ila12G008130	12938	14281	13158	11858	20718	12121	569.1634978	621.0983559	533.5302197	502.9451661	802.4463792	509.7586646	14383.30249	13659.37798	0.074541293	0.706249485	0.826376129	Ila12G008130	GWHBIST00000012	26929193	26932664	-	2116	protein_coding	- && sp|U3UA11|UGT7_CATRO UDP-glucose iridoid glucosyltransferase OS=Catharanthus roseus OX=4058 GN=UGT76A2 PE=1 SV=1 && PF00201:UDP-glucoronosyl and UDP-glucosyl transferase	UDPGT
Ila02G009900	11373	10410	8355	16816	17688	19998	427.4000698	386.76053	289.4044817	609.2864892	585.2434737	718.459656	17744.71384	10236.56709	0.793685736	5.05E-06	6.25E-05	Ila02G009900	GWHBIST00000002	20261238	20277216	+	2477	protein_coding	- && sp|Q93Y08|AB1K8_ARATH Protein ACTIVITY OF BC1 COMPLEX KINASE 8, chloroplastic OS=Arabidopsis thaliana OX=3702 GN=ABC1K8 PE=2 SV=1 && PF03109:ABC1 family	ABC1
Ila14G024750	14218	15270	12449	13897	13466	15311	456.222119	484.4051281	368.1896218	429.9304294	380.4299829	469.6752295	13905.93425	14218.60511	-0.032074062	0.832816188	0.908259675	Ila14G024750	GWHBIST00000014	53384080	53388118	+	2901	protein_coding	- && sp|Q43848|TKTC_SOLTU Transketolase, chloroplastic OS=Solanum tuberosum OX=4113 PE=2 SV=1 && PF02780:Transketolase, C-terminal domain|PF02779:Transketolase, pyrimidine binding domain|PF00456:Transketolase, thiamine diphosphate binding domain	-
Ila09G019100	15101	14062	11178	13039	13854	17370	1226.61041	1129.22348	836.8821259	1021.138201	990.7735912	1348.829418	14422.81621	13701.72633	0.074006939	0.695707601	0.820093868	Ila09G019100	GWHBIST00000009	37023571	37026461	+	1146	protein_coding	- && sp|Q8LCA1|CUT1B_ARATH Protein CURVATURE THYLAKOID 1B, chloroplastic OS=Arabidopsis thaliana OX=3702 GN=CURT1B PE=1 SV=2 && PF14159:CAAD domains of cyanobacterial aminoacyl-tRNA synthetase	-
Ila09G007150	7935	8461	7019	18949	21695	20352	264.5556697	278.8840681	215.6972624	609.1100112	636.8367201	648.6844818	19809.36171	7937.174961	1.319536874	1.04E-22	2.77E-20	Ila09G007150	GWHBIST00000009	10593436	10600167	-	2792	protein_coding	- && sp|Q02028|HSP7S_PEA Stromal 70 kDa heat shock-related protein, chloroplastic OS=Pisum sativum OX=3888 GN=HSP70 PE=2 SV=1 && PF00012:Hsp70 protein	HSP70
Ila09G016460	13401	15405	11614	15725	11840	14058	470.913136	535.1766641	376.1704426	532.7623815	366.3140703	472.2624429	13603.70271	13712.04265	-0.011450073	0.951348797	0.975324957	Ila09G016460	GWHBIST00000009	34398687	34405599	+	2649	protein_coding	- && sp|Q43848|TKTC_SOLTU Transketolase, chloroplastic OS=Solanum tuberosum OX=4113 PE=2 SV=1 && PF02780:Transketolase, C-terminal domain|PF02779:Transketolase, pyrimidine binding domain|PF00456:Transketolase, thiamine diphosphate binding domain	-
Ila05G007240	15269	14111	11489	12796	13624	14553	1248.975414	1141.1243	866.2131492	1009.152557	981.1744472	1138.025768	13331.78691	13877.10157	-0.057815914	0.723856489	0.838985678	Ila05G007240	GWHBIST00000005	22188832	22191487	-	1138	protein_coding	- && sp|P54773|PSBS_SOLLC Photosystem II 22 kDa protein, chloroplastic OS=Solanum lycopersicum OX=4081 GN=PSBS PE=3 SV=1 && PF00504:Chlorophyll A-B binding protein	-
Ila17G002860	15815	16034	11834	11918	9679	14797	1865.854393	1870.175227	1286.883897	1355.66141	1005.39644	1668.931452	11907.24465	14840.99723	-0.317755684	0.144056447	0.28927313	Ila17G002860	GWHBIST00000017	3484882	3486170	+	789	protein_coding	- && sp|P27489|CB23_SOLLC Chlorophyll a-b binding protein 13, chloroplastic OS=Solanum lycopersicum OX=4081 GN=CAB13 PE=1 SV=1 && PF00504:Chlorophyll A-B binding protein	-
Ila07G007760	7753	7159	5275	15148	22401	21428	254.5671011	232.3896185	159.6445898	479.5424844	647.5871153	672.6209701	19107.14341	6864.67567	1.476901035	8.53E-13	5.27E-11	Ila07G007760	GWHBIST00000007	22279454	22288374	+	2835	protein_coding	- && sp|Q9SIF2|HS905_ARATH Heat shock protein 90-5, chloroplastic OS=Arabidopsis thaliana OX=3702 GN=HSP90-5 PE=1 SV=1 && PF00183:Hsp90 protein|PF02518:Histidine kinase-, DNA gyrase B-, and HSP90-like ATPase	HATPase_c
Ila13G013450	13581	11487	9643	14369	11201	17650	849.0291625	709.9525887	555.6512219	866.0773936	616.5182768	1054.852753	14148.88776	11791.25626	0.262969964	0.238155382	0.412436242	Ila13G013450	GWHBIST00000013	27444735	27451893	-	1489	protein_coding	- && sp|Q56YA5|SGAT_ARATH Serine--glyoxylate aminotransferase OS=Arabidopsis thaliana OX=3702 GN=AGT1 PE=1 SV=2 && PF00266:Aminotransferase class-V	Aminotran_5
Ila20G000680	14068	13875	10499	10784	13696	14844	1769.645174	1725.514829	1217.309526	1307.895409	1516.861345	1785.093853	12774.64827	13059.02205	-0.031737931	0.865194932	0.926890237	Ila20G000680	GWHBIST00000020	647758	649251	-	740	protein_coding	- && sp|P06183|PSBR_SOLTU Photosystem II 10 kDa polypeptide, chloroplastic OS=Solanum tuberosum OX=4113 GN=PSBR PE=2 SV=1 && PF04725:Photosystem II 10 kDa polypeptide PsbR	-
Ila15G022470	8504	11977	14806	12275	15104	14664	462.3863953	643.8159222	742.0254302	643.4911764	723.056231	762.237867	13647.90523	11849.21628	0.203862641	0.271707626	0.45101552	Ila15G022470	GWHBIST00000015	55020344	55023198	-	1712	protein_coding	- && sp|Q9SB81|PER42_ARATH Peroxidase 42 OS=Arabidopsis thaliana OX=3702 GN=PER42 PE=1 SV=2 && PF00141:Peroxidase	-
Ila01G000130	20343	25133	18716	5125	2652	3994	605.1945274	739.1901854	513.2066533	146.9985877	69.46272443	113.5911054	3867.397941	21766.37601	-2.492746596	7.38E-23	2.04E-20	Ila01G000130	GWHBIST00000001	212377	218425	+	3129	protein_coding	- && sp|O82627|SSG1_ANTMA Granule-bound starch synthase 1, chloroplastic/amyloplastic OS=Antirrhinum majus OX=4151 GN=WAXY PE=2 SV=1 && PF08323:Starch synthase catalytic domain|PF00534:Glycosyl transferases group 1	Glycos_transf_1
Ila06G007770	12927	12227	10084	13219	12971	13535	653.2714509	610.8684708	469.7080635	644.0711297	577.1220796	653.8986832	12934.28905	11959.99572	0.113004107	0.466668338	0.639648199	Ila06G007770	GWHBIST00000006	7964918	7976098	+	1842	protein_coding	- && sp|Q944G9|ALFP2_ARATH Fructose-bisphosphate aldolase 2, chloroplastic OS=Arabidopsis thaliana OX=3702 GN=FBA2 PE=1 SV=2 && PF11833:Protein CHAPERONE-LIKE PROTEIN OF POR1-like|PF00274:Fructose-bisphosphate aldolase class-I	-
Ila18G015200	9992	9843	7726	14924	14036	18108	609.9133478	593.9844357	434.6800064	878.2946805	754.3230388	1056.677526	15358.14304	9357.660569	0.714800818	0.000103302	0.00083721	Ila18G015200	GWHBIST00000018	36451748	36455011	-	1525	protein_coding	- && sp|P19446|MDHG_CITLA Malate dehydrogenase, glyoxysomal OS=Citrullus lanatus OX=3654 PE=1 SV=1 && PF00056:lactate/malate dehydrogenase, NAD binding domain|PF02866:lactate/malate dehydrogenase, alpha/beta C-terminal domain	-
Ila14G020840	6730	5803	5937	12350	28627	14338	260.2702506	221.8676095	211.6292844	460.4852493	974.7283644	530.0957403	17714.84643	6253.45745	1.502267799	5.26E-09	1.41E-07	Ila14G020840	GWHBIST00000014	48354116	48357265	-	2407	protein_coding	- && sp|P27322|HSP72_SOLLC Heat shock cognate 70 kDa protein 2 OS=Solanum lycopersicum OX=4081 GN=HSC-2 PE=2 SV=1 && PF00012:Hsp70 protein	HSP70
Ila20G001070	13349	19271	13364	9964	6166	11122	967.0104373	1380.125396	892.314898	695.9137972	393.2640515	770.23206	8947.643021	15588.5201	-0.800931576	0.001786212	0.009359749	Ila20G001070	GWHBIST00000020	988698	991104	-	1285	protein_coding	- && sp|O65581|ALFC5_ARATH Fructose-bisphosphate aldolase 5, cytosolic OS=Arabidopsis thaliana OX=3702 GN=FBA5 PE=1 SV=1 && PF00274:Fructose-bisphosphate aldolase class-I	-
Ila02G011510	14373	14856	12825	9852	7084	13210	949.559075	970.3051164	780.9643068	627.5354519	412.0514207	834.3219185	9887.575712	14250.77164	-0.52737622	0.024531906	0.07739885	Ila02G011510	GWHBIST00000002	22402098	22405976	+	1409	protein_coding	- && sp|P51119|GLNA2_VITVI Glutamine synthetase cytosolic isozyme 2 OS=Vitis vinifera OX=29760 GN=GS1-2 PE=2 SV=1 && PF00120:Glutamine synthetase, catalytic domain|PF03951:Glutamine synthetase, beta-Grasp domain	-
Ila05G015870	13576	13348	9979	11301	10842	13084	1016.684627	988.2401473	688.8119908	815.9632555	714.8618665	936.7231111	11485.9563	12538.81985	-0.126520431	0.493211601	0.662478265	Ila05G015870	GWHBIST00000005	32557891	32559133	-	1243	protein_coding	- && sp|Q9SGS4|CDSP_ARATH Thioredoxin-like protein CDSP32, chloroplastic OS=Arabidopsis thaliana OX=3702 GN=CDSP32 PE=1 SV=1 && PF00085:Thioredoxin	-
Ila19G009570	12093	14857	20617	7777	8713	7998	317.7228553	385.9023247	499.2741986	196.9998078	201.5488934	200.8871123	7953.2424	15959.92452	-1.004863737	8.33E-09	2.12E-07	Ila19G009570	GWHBIST00000019	25760949	25767360	-	3543	protein_coding	- && sp|Q42699|METE_CATRO 5-methyltetrahydropteroyltriglutamate--homocysteine methyltransferase OS=Catharanthus roseus OX=4058 GN=METE PE=2 SV=1 && PF01717:Cobalamin-independent synthase, Catalytic domain|PF08267:Cobalamin-independent synthase, N-terminal domain	-
Ila16G017210	11982	12126	9448	11609	10792	15946	1570.928876	1571.725282	1141.737697	1467.443261	1245.7401	1998.643059	12527.89232	11391.4213	0.137196843	0.506466252	0.674173775	Ila16G017210	GWHBIST00000016	43106857	43107566	+	710	protein_coding	- && - && PF06596:Photosystem II reaction centre X protein (PsbX)	-
Ila09G018560	10519	9861	7607	13861	13523	15637	146.1454196	135.4451879	97.41445793	185.6712309	165.4177471	207.6923317	14019.96903	9509.336099	0.560092262	0.001813884	0.009476908	Ila09G018560	GWHBIST00000009	36490493	36516117	+	6700	protein_coding	- && sp|F4JKH6|TSS_ARATH Protein TSS OS=Arabidopsis thaliana OX=3702 GN=TSS PE=1 SV=1 && -	-
Ila15G015070	13860	13454	13434	10837	10597	8738	214.4930155	205.8416315	191.6260365	161.6956354	144.3880194	129.2760986	9806.505822	13784.45288	-0.491222532	0.000145373	0.00111763	Ila15G015070	GWHBIST00000015	39714545	39773851	-	6015	protein_coding	- && sp|Q42093|AB2C_ARATH ABC transporter C family member 2 OS=Arabidopsis thaliana OX=3702 GN=ABCC2 PE=1 SV=2 && PF00005:ABC transporter|PF00664:ABC transporter transmembrane region	ABC_membrane
Ila18G006260	11061	9831	8099	13323	13769	14526	523.4504634	459.9501449	353.2741367	607.8865351	573.6960985	657.1787447	13544.41068	9846.014768	0.460117353	0.005623453	0.023995399	Ila18G006260	GWHBIST00000018	8409487	8423860	-	1967	protein_coding	- && sp|Q84KG5|CCD_CROSA Carotenoid 9,10(9',10')-cleavage dioxygenase OS=Crocus sativus OX=82528 GN=CCD PE=1 SV=1 && PF03055:Retinal pigment epithelial membrane protein	RPE65
Ila05G002580	12994	15684	8897	11666	8668	12678	1466.136717	1749.525629	925.2827095	1269.091336	861.090525	1367.535558	10806.10166	12793.33573	-0.243548021	0.326815023	0.510172183	Ila05G002580	GWHBIST00000005	14406145	14408508	-	825	protein_coding	- && sp|P13869|CB12_PETHY Chlorophyll a-b binding protein, chloroplastic OS=Petunia hybrida OX=4102 PE=2 SV=1 && PF00504:Chlorophyll A-B binding protein	-
Ila18G011730	17350	17269	13721	8667	4798	8735	554.9988029	546.124455	404.5550064	267.3010491	135.1297929	267.1232862	7296.407169	16407.99634	-1.169178523	4.09E-06	5.23E-05	Ila18G011730	GWHBIST00000018	30282972	30289868	-	2910	protein_coding	- && sp|Q3KTM0|FRO7_ARATH Ferric reduction oxidase 7, chloroplastic OS=Arabidopsis thaliana OX=3702 GN=FRO7 PE=2 SV=1 && PF01794:Ferric reductase like transmembrane component|PF08022:FAD-binding domain|PF08030:Ferric reductase NAD binding domain	FAD_binding_8
Ila16G019810	11901	15818	13912	9566	8020	10819	368.0463506	483.6180476	396.5590615	285.2257539	218.369374	319.8618566	9281.919413	14069.84187	-0.600145135	0.000834169	0.004976039	Ila16G019810	GWHBIST00000016	46303891	46310245	+	3010	protein_coding	- && sp|P21616|AVP_VIGRR Pyrophosphate-energized vacuolar membrane proton pump OS=Vigna radiata var. radiata OX=3916 PE=1 SV=4 && PF03030:Inorganic H+ pyrophosphatase	-
Ila14G022460	8820	8807	6430	10609	17582	17552	420.3895367	414.9952988	282.4837919	487.5251918	737.8190918	799.7720002	14810.93887	8175.670718	0.85729294	0.00011711	0.000930901	Ila14G022460	GWHBIST00000014	50892802	50895677	-	1953	protein_coding	- && sp|P48620|FAD3C_SESIN Omega-3 fatty acid desaturase, chloroplastic OS=Sesamum indicum OX=4182 GN=FAD7 PE=2 SV=1 && PF00487:Fatty acid desaturase|PF11960:Domain of unknown function (DUF3474)	-
Ila14G026160	2433	1610	2147	18699	25427	18914	88.39924173	57.83146238	71.90146242	655.0344057	813.3919202	656.9708313	20391.52007	2092.80719	3.28450187	8.43E-73	1.95E-68	Ila14G026160	GWHBIST00000014	54831663	54834901	+	2562	protein_coding	- && sp|P51819|HSP83_IPONI Heat shock protein 83 OS=Ipomoea nil OX=35883 GN=HSP83A PE=2 SV=1 && PF00183:Hsp90 protein|PF02518:Histidine kinase-, DNA gyrase B-, and HSP90-like ATPase	HATPase_c
Ila09G009020	13282	13575	9970	9212	10153	12718	799.7229191	808.0677464	553.3124896	534.7727824	538.231056	732.0675553	10450.43224	12511.67248	-0.259700257	0.186023771	0.347989769	Ila09G009020	GWHBIST00000009	17518387	17523731	+	1546	protein_coding	- && sp|Q9SA52|CP41B_ARATH Chloroplast stem-loop binding protein of 41 kDa b, chloroplastic OS=Arabidopsis thaliana OX=3702 GN=CSP41B PE=1 SV=1 && PF01370:NAD dependent epimerase/dehydratase family	Epimerase
Ila06G004140	11957	11151	9297	12062	10702	12830	429.4106272	395.9097912	307.7461571	417.6468235	338.3871057	440.4873977	11614.10696	10998.17956	0.078619222	0.645374321	0.783447782	Ila06G004140	GWHBIST00000006	3935325	3944446	-	2592	protein_coding	- && sp|Q40412|ABA2_NICPL Zeaxanthin epoxidase, chloroplastic OS=Nicotiana plumbaginifolia OX=4092 GN=ABA2 PE=1 SV=1 && PF01494:FAD binding domain|PF00498:FHA domain	FHA
Ila18G012810	8378	7312	7080	13856	14692	16494	296.8696767	256.1495125	231.2373531	473.3721001	458.3578813	558.7374045	14662.66561	7715.225133	0.926393751	2.88E-10	1.02E-08	Ila18G012810	GWHBIST00000018	32944946	32952064	+	2627	protein_coding	- && sp|Q02028|HSP7S_PEA Stromal 70 kDa heat shock-related protein, chloroplastic OS=Pisum sativum OX=3888 GN=HSP70 PE=2 SV=1 && PF00012:Hsp70 protein	HSP70
Ila09G001040	8822	9053	11571	15581	12147	10455	695.3488041	705.4399433	840.6317727	1184.050664	842.9522812	787.7999848	12448.82243	9912.966111	0.328584443	0.071683731	0.173055508	Ila09G001040	GWHBIST00000009	1013031	1014211	-	1181	protein_coding	- && sp|Q8W171|CYP1_SOYBN Peptidyl-prolyl cis-trans isomerase 1 OS=Glycine max OX=3847 GN=Cyp1 PE=2 SV=1 && PF00160:Cyclophilin type peptidyl-prolyl cis-trans isomerase/CLD	Pro_isomerase
Ila08G014070	9559	10077	8878	9023	21272	8801	196.8174093	205.122913	168.4866279	179.1188557	385.6183337	173.2364767	12494.12228	9657.504588	0.371566169	0.184439997	0.345892122	Ila08G014070	GWHBIST00000008	34216696	34225105	+	4521	protein_coding	- && sp|Q7DM58|AB4C_ARATH ABC transporter C family member 4 OS=Arabidopsis thaliana OX=3702 GN=ABCC4 PE=1 SV=2 && PF00005:ABC transporter|PF00664:ABC transporter transmembrane region	ABC_tran
Ila16G001410	10202	10495	8296	11159	11615	15776	564.941088	574.5557209	423.4341048	595.7751983	566.28539	835.1625521	12572.58797	9838.70355	0.353751261	0.068259632	0.167006503	Ila16G001410	GWHBIST00000016	1392231	1393911	-	1681	protein_coding	- && sp|P29790|ATPG_TOBAC ATP synthase gamma chain, chloroplastic OS=Nicotiana tabacum OX=4097 GN=ATPC PE=1 SV=1 && PF00231:ATP synthase	-
Ila06G000200	12723	11667	17590	9273	9414	6383	656.1420591	594.8389734	836.1292913	461.0711083	427.4455933	314.6947276	8132.976832	14107.5953	-0.794627289	3.17E-05	0.000306344	Ila06G000200	GWHBIST00000006	284470	286682	+	1805	protein_coding	- && sp|P51090|CHSY_VITVI Chalcone synthase OS=Vitis vinifera OX=29760 GN=CHS PE=2 SV=1 && PF00195:Chalcone and stilbene synthases, N-terminal domain|PF02797:Chalcone and stilbene synthases, C-terminal domain	Chal_sti_synt_N
Ila09G000780	11718	10451	9017	11469	10650	13563	656.3085023	578.6877007	465.4958944	619.326109	525.1730659	726.2172672	11643.11972	10583.66336	0.137644533	0.439571383	0.617306139	Ila09G000780	GWHBIST00000009	762344	765904	-	1662	protein_coding	- && sp|Q9C9W5|HPR1_ARATH Glycerate dehydrogenase HPR, peroxisomal OS=Arabidopsis thaliana OX=3702 GN=HPR PE=1 SV=1 && PF02826:D-isomer specific 2-hydroxyacid dehydrogenase, NAD binding domain|PF00389:D-isomer specific 2-hydroxyacid dehydrogenase, catalytic domain	2-Hacid_dh_C
Ila02G010080	11634	11092	9097	9987	12530	12512	572.9976113	540.0891846	412.9725594	474.2399121	543.3418076	589.1240604	11371.78239	10800.99115	0.074332982	0.649712459	0.78676012	Ila02G010080	GWHBIST00000002	20556017	20560725	+	1890	protein_coding	- && sp|Q9FYV1|INO1_SESIN Inositol-3-phosphate synthase OS=Sesamum indicum OX=4182 PE=2 SV=1 && PF07994:Myo-inositol-1-phosphate synthase|PF01658:Myo-inositol-1-phosphate synthase	-
Ila16G015830	8754	8846	6586	13157	13479	15769	292.0706352	291.7831144	202.5360463	423.2310552	395.9472459	502.9696485	13813.84693	8216.227446	0.749598614	3.14E-05	0.000304232	Ila16G015830	GWHBIST00000016	41083392	41089758	-	2790	protein_coding	- && sp|Q9SZD6|PETS_ARATH Polyprotein of EF-Ts, chloroplastic OS=Arabidopsis thaliana OX=3702 GN=PETs PE=1 SV=1 && PF00889:Elongation factor TS|PF00575:S1 RNA binding domain	S1
Ila05G010500	10228	13032	14460	9724	10839	6201	396.7025881	499.7090944	516.9420443	363.629044	370.1364293	229.9282417	8661.251482	12702.59614	-0.552467085	0.006972723	0.028564756	Ila05G010500	GWHBIST00000005	26656292	26660585	+	2400	protein_coding	- && sp|P21357|AROF_SOLTU Phospho-2-dehydro-3-deoxyheptonate aldolase 1, chloroplastic OS=Solanum tuberosum OX=4113 GN=SHKA PE=1 SV=2 && PF01474:Class-II DAHP synthetase family	-
Ila20G012740	10861	15083	14922	9517	6909	5968	283.2753742	388.9185043	358.7280133	239.31966	158.6545389	148.8072514	7307.868112	13778.52379	-0.914931586	1.26E-05	0.000137581	Ila20G012740	GWHBIST00000020	20705543	20721330	-	3569	protein_coding	- && sp|Q02909|CAPP1_SOYBN Phosphoenolpyruvate carboxylase, housekeeping isozyme OS=Glycine max OX=3847 GN=PPC16 PE=2 SV=1 && PF00311:Phosphoenolpyruvate carboxylase	-
Ila07G010900	10658	10672	8391	10228	9681	13341	1085.46313	1074.526287	787.6845553	1004.313682	868.0762629	1298.924825	10854.65254	10089.18354	0.105508051	0.586094829	0.738617606	Ila07G010900	GWHBIST00000007	25541278	25542191	+	914	protein_coding	- && sp|P80470|PSBY_SPIOL Photosystem II core complex proteins psbY, chloroplastic OS=Spinacia oleracea OX=3562 GN=PSBY PE=1 SV=2 && PF06298:Photosystem II protein Y (PsbY)	-
Ila09G002860	8272	6088	5320	15266	13124	14838	208.335903	151.5863532	123.4992939	370.6962146	291.0168366	357.2606901	14103.4491	6690.958704	1.075796771	1.21E-07	2.34E-06	Ila09G002860	GWHBIST00000009	2887188	2909501	+	3696	protein_coding	- && sp|Q8VY06|PREP2_ARATH Presequence protease 2, chloroplastic/mitochondrial OS=Arabidopsis thaliana OX=3702 GN=PREP2 PE=1 SV=1 && PF08367:Peptidase M16C associated|PF05193:Peptidase M16 inactive domain	-
Ila16G023050	12396	14000	16541	6469	8621	4676	641.4103454	716.1669847	788.8880963	322.7236877	392.7447046	231.3050783	6378.339384	14460.57097	-1.180831042	2.63E-09	7.55E-08	Ila16G023050	GWHBIST00000016	50871087	50874792	+	1799	protein_coding	- && sp|A0A0S2II38|C7A94_KALSE Beta-amyrin 28-monooxygenase OS=Kalopanax septemlobus OX=228393 GN=CYP716A94 PE=1 SV=1 && PF00067:Cytochrome P450	p450
Ila09G001670	10176	10003	12614	11243	10370	8118	650.1343351	631.8123937	742.8105778	692.544229	583.3148879	495.8283146	9666.673192	11047.47193	-0.192650182	0.220004209	0.390533436	Ila09G001670	GWHBIST00000009	1743812	1747705	-	1457	protein_coding	- && sp|P43296|RD19A_ARATH Cysteine protease RD19A OS=Arabidopsis thaliana OX=3702 GN=RD19A PE=1 SV=1 && PF00112:Papain family cysteine protease|PF08246:Cathepsin propeptide inhibitor domain (I29)	Peptidase_C1
Ila17G020390	11194	11837	16474	6678	10356	5846	502.1723053	524.9778384	681.1860811	288.8372287	409.0324817	250.7162819	7370.979248	13274.61186	-0.848709184	4.39E-05	0.000405609	Ila17G020390	GWHBIST00000017	42783753	42786920	-	2075	protein_coding	- && sp|O24312|TCMO_POPTM Trans-cinnamate 4-monooxygenase OS=Populus tremuloides OX=3693 GN=CYP73A13 PE=2 SV=1 && PF00067:Cytochrome P450	p450
Ila14G008360	11000	10085	7745	10032	10802	12515	487.5946667	441.9509091	316.4367621	428.7390926	421.569065	530.3387831	10857.5618	9798.544317	0.148086355	0.428895012	0.607836115	Ila14G008360	GWHBIST00000014	12583674	12591623	-	2100	protein_coding	- && sp|P50433|GLYM_SOLTU Serine hydroxymethyltransferase, mitochondrial OS=Solanum tuberosum OX=4113 PE=2 SV=1 && PF00464:Serine hydroxymethyltransferase	SHMT
Ila07G007110	10689	10876	8089	10271	9799	12120	276.4654001	278.1024251	192.8402978	256.1272215	223.1432568	299.683341	10498.41988	10073.25993	0.059653992	0.74744057	0.85425588	Ila07G007110	GWHBIST00000007	21314387	21322936	-	3599	protein_coding	- && sp|Q9LI74|CHUP1_ARATH Protein CHUP1, chloroplastic OS=Arabidopsis thaliana OX=3702 GN=CHUP1 PE=1 SV=1 && -	-
Ila02G000470	10558	10425	8364	10906	9908	11662	618.5051451	603.7673032	451.6218356	615.9797736	511.0294834	653.1169704	10592.66107	9960.526697	0.088780415	0.597643001	0.747043916	Ila02G000470	GWHBIST00000002	4280379	4319905	-	1589	protein_coding	- && sp|P0DKC3|PGP1A_ARATH Phosphoglycolate phosphatase 1A, chloroplastic OS=Arabidopsis thaliana OX=3702 GN=PGLP1A PE=1 SV=1 && PF13344:Haloacid dehalogenase-like hydrolase|PF13242:HAD-hyrolase-like	-
Ila17G000690	9967	9396	7375	10301	9963	14808	885.2964686	825.0858692	603.7894866	882.1510599	779.1349822	1257.410121	11454.61641	9082.120602	0.334835834	0.119186295	0.252084572	Ila17G000690	GWHBIST00000017	857794	858841	-	1048	protein_coding	- && sp|P12357|PSAG_SPIOL Photosystem I reaction center subunit V, chloroplastic OS=Spinacia oleracea OX=3562 GN=PSAG PE=1 SV=1 && PF01241:Photosystem I psaG / psaK	-
Ila04G005930	10022	10895	8317	10250	9322	11958	501.0260167	538.4743017	383.2408807	494.047885	410.3111117	571.5058773	10290.97809	9920.554899	0.052890088	0.769552231	0.866972068	Ila04G005930	GWHBIST00000004	18047044	18050461	+	1862	protein_coding	- && sp|P46283|S17P_ARATH Sedoheptulose-1,7-bisphosphatase, chloroplastic OS=Arabidopsis thaliana OX=3702 GN=At3g55800 PE=2 SV=1 && PF00316:Fructose-1-6-bisphosphatase, N-terminal domain	-
Ila03G003050	6896	7730	7696	11065	16167	10098	263.5151114	292.0247318	271.06446	407.6608353	543.9212306	368.8925725	12045.85771	7540.589971	0.675827762	5.30E-05	0.000473881	Ila03G003050	GWHBIST00000003	4543161	4546611	-	2436	protein_coding	- && sp|P27322|HSP72_SOLLC Heat shock cognate 70 kDa protein 2 OS=Solanum lycopersicum OX=4081 GN=HSC-2 PE=2 SV=1 && PF00012:Hsp70 protein	HSP70
Ila17G009830	5817	4610	4962	13907	15081	14263	213.0982852	166.9604798	167.547094	491.1946697	486.4176568	499.5144381	14055.7108	5210.784726	1.431634075	1.17E-25	4.95E-23	Ila17G009830	GWHBIST00000017	16146318	16161398	+	2541	protein_coding	- && sp|P08927|RUBB_PEA RuBisCO large subunit-binding protein subunit beta, chloroplastic OS=Pisum sativum OX=3888 PE=1 SV=2 && PF00118:TCP-1/cpn60 chaperonin family	-
Ila03G001860	9575	10283	7728	9640	9780	11621	469.600046	498.5871158	349.3459477	455.8329148	422.305272	544.8652638	10114.22339	9364.576164	0.111117	0.525203399	0.690200136	Ila03G001860	GWHBIST00000003	2651116	2657305	-	1898	protein_coding	- && sp|P46275|F16P1_PEA Fructose-1,6-bisphosphatase, chloroplastic OS=Pisum sativum OX=3888 GN=FBP PE=1 SV=2 && PF00316:Fructose-1-6-bisphosphatase, N-terminal domain	-
Ila05G008900	9494	10020	7763	9798	9124	11728	560.7619928	585.0984292	422.6279135	557.9638698	474.474547	662.2311004	10001.64904	9256.949335	0.111634838	0.535452947	0.699191726	Ila05G008900	GWHBIST00000005	24770697	24776074	+	1576	protein_coding	- && sp|Q42649|F16P2_BETVU Fructose-1,6-bisphosphatase, cytosolic OS=Beta vulgaris OX=161934 PE=2 SV=2 && PF00316:Fructose-1-6-bisphosphatase, N-terminal domain	-
Ila02G005130	10038	9536	7926	8991	9933	11491	1254.227951	1177.951456	912.8146465	1083.120014	1092.717804	1372.598059	9899.736031	9332.156281	0.085202467	0.6133162	0.758896565	Ila02G005130	GWHBIST00000002	14262412	14263514	+	745	protein_coding	- && sp|P22179|PSAH_SPIOL Photosystem I reaction center subunit VI, chloroplastic OS=Spinacia oleracea OX=3562 GN=PSAH PE=1 SV=1 && PF03244:Photosystem I reaction centre subunit VI	-
Ila18G016470	8133	7519	7556	10152	11544	12749	255.1636361	233.21687	218.5039074	307.0852229	318.8765834	382.3846088	11203.60233	7854.098297	0.512461949	0.000178464	0.001333564	Ila18G016470	GWHBIST00000018	37893603	37904288	+	2967	protein_coding	- && sp|Q9FXA2|PABP8_ARATH Polyadenylate-binding protein 8 OS=Arabidopsis thaliana OX=3702 GN=PAB8 PE=1 SV=1 && PF00658:Poly-adenylate binding protein, unique domain|PF00076:RNA recognition motif. (a.k.a. RRM, RBD, or RNP domain)	RRM_1
Ila14G003200	9726	10922	11548	9582	8496	7158	440.7774643	489.3495088	482.382052	418.6784262	338.9986127	310.1223622	8213.353073	10864.80787	-0.40364637	0.00603931	0.025400597	Ila14G003200	GWHBIST00000014	3745993	3751043	+	2054	protein_coding	- && sp|P55217|CGS1_ARATH Cystathionine gamma-synthase 1, chloroplastic OS=Arabidopsis thaliana OX=3702 GN=CGS1 PE=1 SV=3 && PF01053:Cys/Met metabolism PLP-dependent enzyme	Cys_Met_Meta_PP
Ila04G003660	12198	10243	8264	7282	8615	9875	938.4017628	779.0390475	585.9893767	540.1198769	583.5173422	726.2624035	8382.313788	10437.3634	-0.316312175	0.109591521	0.236799796	Ila04G003660	GWHBIST00000004	14471413	14473155	-	1210	protein_coding	- && sp|P12360|CB11_SOLLC Chlorophyll a-b binding protein 6A, chloroplastic OS=Solanum lycopersicum OX=4081 GN=CAB6A PE=2 SV=1 && PF00504:Chlorophyll A-B binding protein	-
Ila03G002920	11905	10944	13397	5725	6854	6681	4675.915023	4249.57171	4850.025433	2167.963673	2370.17062	2508.620427	6254.14407	12226.05882	-0.967079233	3.95E-16	4.22E-14	Ila03G002920	GWHBIST00000003	4358944	4360084	-	237	protein_coding	- && sp|P43390|MT2_ACTDE Metallothionein-like protein type 2 OS=Actinidia deliciosa OX=3627 GN=pKIWI504 PE=2 SV=1 && -	-
Ila20G002270	8170	8515	7199	9477	10402	11144	327.6668245	337.6190439	266.122649	366.4549529	367.3039218	427.2753037	10091.37919	8095.53819	0.317955723	0.026047547	0.081035737	Ila20G002270	GWHBIST00000020	2106801	2109734	-	2321	protein_coding	- && sp|Q8RWE8|GGAP1_ARATH GDP-L-galactose phosphorylase 1 OS=Arabidopsis thaliana OX=3702 GN=VTC2 PE=1 SV=1 && -	-
Ila17G002240	8243	10064	10980	8482	9719	7115	747.1372894	901.815319	917.3112107	741.2294742	775.5949898	616.5187503	8204.67825	9869.658478	-0.266548488	0.06952284	0.169117299	Ila17G002240	GWHBIST00000017	2406232	2407505	-	1027	protein_coding	- && sp|P0CG85|UBI1P_NICSY Polyubiquitin OS=Nicotiana sylvestris OX=4096 GN=UBI11 PE=2 SV=1 && PF00240:Ubiquitin family	ubiquitin
Ila13G005040	5514	5654	5057	11653	14957	11059	205.0649651	207.8798421	173.347231	417.8320528	489.7421691	393.1849057	12192.36939	5495.474873	1.149742749	4.13E-16	4.40E-14	Ila13G005040	GWHBIST00000013	6169914	6175782	+	2503	protein_coding	- && sp|Q9FJL3|FKB65_ARATH Peptidyl-prolyl cis-trans isomerase FKBP65 OS=Arabidopsis thaliana OX=3702 GN=FKBP65 PE=1 SV=1 && PF00254:FKBP-type peptidyl-prolyl cis-trans isomerase|PF00515:Tetratricopeptide repeat	FKBP_C
Ila13G007560	9827	14641	12481	7887	5084	3780	419.2294333	617.4949614	490.771621	324.4008252	190.9565906	154.1625489	5470.772542	12481.45493	-1.189996623	5.88E-06	7.16E-05	Ila13G007560	GWHBIST00000013	16770356	16773531	-	2182	protein_coding	- && sp|Q8L7Y9|NPC1_ARATH Non-specific phospholipase C1 OS=Arabidopsis thaliana OX=3702 GN=NPC1 PE=2 SV=1 && PF04185:Phosphoesterase family	Phosphoesterase
Ila09G004300	7675	12675	21688	2329	4547	4525	319.3728224	521.4340743	831.8371749	93.43903835	166.5876595	180.0090865	3686.246386	14011.99262	-1.926432262	2.50E-09	7.22E-08	Ila09G004300	GWHBIST00000009	4681353	4685085	-	2237	protein_coding	- && sp|P46259|TBA1_PEA Tubulin alpha-1 chain OS=Pisum sativum OX=3888 GN=TUBA1 PE=3 SV=1 && PF03953:Tubulin C-terminal domain|PF00091:Tubulin/FtsZ family, GTPase domain	Tubulin
Ila09G002370	8462	8890	7376	7586	10961	10130	439.5624364	456.5424651	353.1569093	379.9265892	501.2980657	503.0524502	9289.480377	8383.432071	0.148110752	0.373632741	0.555810763	Ila09G002370	GWHBIST00000009	2300911	2305261	-	1792	protein_coding	- && sp|Q94B35|ISPH_ARATH 4-hydroxy-3-methylbut-2-enyl diphosphate reductase, chloroplastic OS=Arabidopsis thaliana OX=3702 GN=ISPH PE=1 SV=1 && PF02401:LytB protein	-
Ila16G005220	8176	7915	5976	8551	9623	12979	416.1143888	398.2489483	280.3378175	419.5928284	431.2018711	631.4941846	10152.59209	7497.900312	0.437311775	0.039244368	0.110032045	Ila16G005220	GWHBIST00000016	6688540	6690368	-	1829	protein_coding	- && sp|P27493|CB22_TOBAC Chlorophyll a-b binding protein 21, chloroplastic OS=Nicotiana tabacum OX=4097 GN=CAB21 PE=2 SV=1 && PF00504:Chlorophyll A-B binding protein	-
Ila06G005560	11010	11147	7677	6512	7534	9015	400.8133213	401.1850094	257.5998568	228.5643641	241.4786528	313.7450132	7505.156194	10146.17421	-0.434960676	0.035311464	0.101522265	Ila06G005560	GWHBIST00000006	5432939	5440737	-	2557	protein_coding	- && sp|P50433|GLYM_SOLTU Serine hydroxymethyltransferase, mitochondrial OS=Solanum tuberosum OX=4113 PE=2 SV=1 && PF00464:Serine hydroxymethyltransferase	SHMT
Ila16G024890	7573	11662	16875	3425	7154	5659	233.8116768	355.9615953	480.2211348	101.9525553	194.4668035	167.0298942	5232.628271	12080.89763	-1.207102706	1.91E-05	0.000197574	Ila16G024890	GWHBIST00000016	53006523	53012647	-	3015	protein_coding	- && sp|P49039|SUS2_SOLTU Sucrose synthase OS=Solanum tuberosum OX=4113 PE=3 SV=1 && PF00862:Sucrose synthase|PF00534:Glycosyl transferases group 1	Glycos_transf_1
Ila14G012320	8220	8510	6448	8022	8930	11885	843.626254	863.4549764	609.9616723	793.7801353	806.9154449	1166.094448	9397.53321	7869.945823	0.255945743	0.206136727	0.373209361	Ila14G012320	GWHBIST00000014	27647350	27649348	+	907	protein_coding	- && sp|P49107|PSAN_ARATH Photosystem I reaction center subunit N, chloroplastic OS=Arabidopsis thaliana OX=3702 GN=PSAN PE=1 SV=2 && PF05479:Photosystem I reaction centre subunit N (PSAN or PSI-N)	-
Ila12G011610	6794	7027	7129	9282	11013	10683	246.560629	252.1157677	238.465771	324.7723519	351.8861116	370.6360745	10059.73611	7080.58279	0.506676427	2.57E-06	3.46E-05	Ila12G011610	GWHBIST00000012	30284253	30290719	-	2565	protein_coding	- && sp|Q9S7C0|HSP7O_ARATH Heat shock 70 kDa protein 14 OS=Arabidopsis thaliana OX=3702 GN=HSP70-14 PE=1 SV=1 && PF00012:Hsp70 protein	HSP70
Ila05G011380	8759	8316	8230	8845	8890	7962	72.57165141	68.11751997	62.85090899	70.65609255	64.8503823	63.06536666	8354.51264	8563.541343	-0.035630263	0.758980774	0.86104047	Ila05G011380	GWHBIST00000005	27736854	27755395	-	11235	protein_coding	- && sp|Q8GY23|UPL1_ARATH E3 ubiquitin-protein ligase UPL1 OS=Arabidopsis thaliana OX=3702 GN=UPL1 PE=1 SV=3 && PF00627:UBA/TS-N domain|PF06025:Domain of Unknown Function (DUF913)|PF06012:Domain of Unknown Function (DUF908)|PF00632:HECT-domain (ubiquitin-transferase)|PF14377:Ubiquitin binding region	HECT
Ila16G003380	7872	8146	6637	8758	8829	10140	432.8263413	442.7972056	336.3563757	464.27237	427.4038354	532.9946202	9032.373114	7683.918748	0.233283783	0.137091813	0.279327581	Ila16G003380	GWHBIST00000016	3685721	3689973	-	1693	protein_coding	- && sp|Q9ZSR7|TPT_ARATH Triose phosphate/phosphate translocator TPT, chloroplastic OS=Arabidopsis thaliana OX=3702 GN=TPT PE=1 SV=1 && PF03151:Triose-phosphate Transporter family	-
Ila17G016860	8295	8849	6724	7380	10488	8409	284.5064412	300.055627	212.5703395	244.0458204	316.7135847	275.7251221	8501.550437	8101.597996	0.069590992	0.687599768	0.81435161	Ila17G016860	GWHBIST00000017	38480596	38489634	-	2714	protein_coding	- && sp|F4K0E8|ISPG_ARATH 4-hydroxy-3-methylbut-2-en-1-yl diphosphate synthase (ferredoxin), chloroplastic OS=Arabidopsis thaliana OX=3702 GN=ISPG PE=1 SV=1 && PF04551:GcpE protein	-
Ila13G010460	7662	8568	9397	8371	7722	8031	339.7936552	375.6509081	384.1152882	357.9231254	301.509649	340.4858091	7859.72695	8642.943877	-0.137111338	0.264136825	0.442908632	Ila13G010460	GWHBIST00000013	22830854	22834325	-	2099	protein_coding	- && sp|P17786|EF1A_SOLLC Elongation factor 1-alpha OS=Solanum lycopersicum OX=4081 PE=2 SV=1 && PF03144:Elongation factor Tu domain 2|PF03143:Elongation factor Tu C-terminal domain|PF00009:Elongation factor Tu GTP binding domain	GTP_EFTU
Ila09G008370	6702	5618	5083	10565	9930	10669	205.1509628	170.0132379	143.4129912	311.8013111	267.6188405	312.2116637	10153.88773	5905.548114	0.781929021	1.43E-06	2.07E-05	Ila09G008370	GWHBIST00000009	14774701	14782811	-	3041	protein_coding	- && sp|Q8L7S8|RH3_ARATH DEAD-box ATP-dependent RNA helicase 3, chloroplastic OS=Arabidopsis thaliana OX=3702 GN=RH3 PE=1 SV=2 && PF00271:Helicase conserved C-terminal domain|PF00098:Zinc knuckle|PF00270:DEAD/DEAH box helicase|PF08152:GUCT (NUC152) domain	DEAD
Ila17G024820	4975	6116	6698	12160	11027	7317	313.3316078	380.8118608	388.8261936	738.386923	611.458233	440.5553195	9909.574314	5994.060265	0.72526947	0.000263702	0.001858552	Ila17G024820	GWHBIST00000017	47452920	47456115	+	1478	protein_coding	- && sp|P46423|GSTF_HYOMU Glutathione S-transferase OS=Hyoscyamus muticus OX=35626 PE=1 SV=1 && PF00043:Glutathione S-transferase, C-terminal domain|PF02798:Glutathione S-transferase, N-terminal domain	GST_N
Ila06G006300	9359	9108	6712	6774	7000	9314	886.260688	852.6816716	585.8456839	618.466998	583.6175977	843.1882469	7528.962776	8557.901066	-0.184793734	0.369825646	0.552273283	Ila06G006300	GWHBIST00000006	6199253	6200902	-	983	protein_coding	- && sp|Q02980|RBS_MALSP Ribulose bisphosphate carboxylase small subunit, chloroplastic OS=Malus sp. OX=3751 GN=RBCS PE=2 SV=1 && PF12338:Ribulose-1,5-bisphosphate carboxylase small subunit|PF00101:Ribulose bisphosphate carboxylase, small chain	-
Ila09G005840	7769	6918	5782	9649	7834	10235	542.5259652	477.6038644	372.1626133	649.6463649	481.6563322	683.2812859	9058.11026	6950.099075	0.382184242	0.045400746	0.122265632	Ila09G005840	GWHBIST00000009	7765738	7767345	-	1333	protein_coding	- && sp|P27524|CB4A_SOLLC Chlorophyll a-b binding protein CP24 10A, chloroplastic OS=Solanum lycopersicum OX=4081 GN=CAP10A PE=3 SV=1 && PF00504:Chlorophyll A-B binding protein	-
Ila17G003640	8749	11860	12382	6711	4565	3545	330.524205	442.956837	431.1564633	244.4395025	151.8392097	128.0316565	4837.929442	11115.46062	-1.200147525	4.64E-07	7.74E-06	Ila17G003640	GWHBIST00000017	4641346	4648803	+	2464	protein_coding	- && sp|Q42908|PMGI_MESCR 2,3-bisphosphoglycerate-independent phosphoglycerate mutase OS=Mesembryanthemum crystallinum OX=3544 GN=PGM1 PE=2 SV=1 && PF06415:BPG-independent PGAM N-terminus (iPGM_N)|PF01676:Metalloenzyme superfamily	-
Ila17G022610	7395	10749	16369	3726	4706	4774	196.3973901	282.2262884	400.6996205	95.40687785	110.0392843	121.2093775	4287.542424	11541.62563	-1.428649049	1.78E-09	5.34E-08	Ila17G022610	GWHBIST00000017	45140735	45147081	+	3505	protein_coding	- && sp|Q84JA6|CESA4_ARATH Cellulose synthase A catalytic subunit 4 [UDP-forming] OS=Arabidopsis thaliana OX=3702 GN=CESA4 PE=1 SV=1 && PF03552:Cellulose synthase|PF14569:Zinc-binding RING-finger	-
Ila02G005660	7255	7134	6965	9513	8837	7954	87.9121032	85.46262458	77.79140629	111.1394005	94.27887869	92.14104054	8560.088215	7225.464376	0.244542985	0.056226094	0.144391899	Ila02G005660	GWHBIST00000002	14821762	14835861	-	7682	protein_coding	- && sp|Q9SSD2|PRP8A_ARATH Pre-mRNA-processing-splicing factor 8A OS=Arabidopsis thaliana OX=3702 GN=PRP8A PE=1 SV=1 && PF08083:PROCN (NUC071) domain|PF10597:U5-snRNA binding site 2 of PrP8|PF12134:PRP8 domain IV core|PF10598:RNA recognition motif of the spliceosomal PrP8|PF08084:PROCT (NUC072) domain|PF08082:PRO8NT (NUC069), PrP8 N-terminal domain|PF10596:U6-snRNA interacting domain of PrP8	-
Ila15G006090	5981	5308	5538	11211	9330	10287	240.4962801	211.0072331	205.251699	434.6285119	330.3045109	395.4390673	10059.55223	5693.573138	0.821150804	1.94E-08	4.52E-07	Ila15G006090	GWHBIST00000015	7581180	7588763	+	2315	protein_coding	- && sp|Q05758|ILV5_ARATH Ketol-acid reductoisomerase, chloroplastic OS=Arabidopsis thaliana OX=3702 GN=At3g58610 PE=1 SV=2 && PF07991:Acetohydroxy acid isomeroreductase, NADPH-binding domain|PF01450:Acetohydroxy acid isomeroreductase, catalytic domain	-
Ila15G004470	8193	7103	9820	7647	8088	6782	316.7174765	271.4580693	349.8966705	285.0095834	275.2761061	250.6358157	7312.49666	8459.080077	-0.2101661	0.126921717	0.264153474	Ila15G004470	GWHBIST00000015	5453189	5458711	+	2408	protein_coding	- && sp|Q08733|PIP13_ARATH Aquaporin PIP1-3 OS=Arabidopsis thaliana OX=3702 GN=PIP1-3 PE=1 SV=1 && PF00230:Major intrinsic protein	-
Ila02G004640	7121	7297	7858	8051	9151	8145	357.5335591	362.2029976	363.6529369	389.7310007	404.5224994	390.9517733	8228.746536	7521.851061	0.129597438	0.164610467	0.31889238	Ila02G004640	GWHBIST00000002	13475393	13481030	-	1854	protein_coding	- && sp|P36444|MAOC_FLAPR NADP-dependent malic enzyme, chloroplastic OS=Flaveria pringlei OX=4226 GN=MODA PE=2 SV=1 && PF00390:Malic enzyme, N-terminal domain|PF03949:Malic enzyme, NAD binding domain	Malic_M
Ila04G004720	4239	2932	4022	11427	14809	9957	170.9673453	116.9083646	149.5171694	444.3460037	525.8644171	383.9145141	11703.74687	3780.401208	1.630382781	5.71E-19	9.39E-17	Ila04G004720	GWHBIST00000004	16410633	16413602	+	2308	protein_coding	- && sp|P09189|HSP7C_PETHY Heat shock cognate 70 kDa protein OS=Petunia hybrida OX=4102 GN=HSP70 PE=2 SV=1 && PF00012:Hsp70 protein	HSP70
Ila09G018460	6735	7007	5731	8205	8888	10135	334.7228641	344.2799759	262.5290916	393.1566843	388.9109087	481.5349393	8862.957061	6603.941404	0.424493315	0.007386858	0.029979475	Ila09G018460	GWHBIST00000009	36385554	36389821	-	1873	protein_coding	- && sp|Q9M158|STR4_ARATH Rhodanese-like domain-containing protein 4, chloroplastic OS=Arabidopsis thaliana OX=3702 GN=STR4 PE=1 SV=2 && -	-
Ila13G011650	9758	9773	8497	5451	7319	5451	504.0708501	499.1034087	404.5718266	271.4852576	332.8747221	269.1926662	5894.87025	9499.691355	-0.688328786	4.86E-06	6.05E-05	Ila13G011650	GWHBIST00000013	24688883	24703229	+	1802	protein_coding	- && sp|Q9SGE0|AXS2_ARATH UDP-D-apiose/UDP-D-xylose synthase 2 OS=Arabidopsis thaliana OX=3702 GN=AXS2 PE=2 SV=1 && PF01370:NAD dependent epimerase/dehydratase family	Epimerase
Ila04G006480	9339	9336	10029	5693	6644	5168	169.9574841	167.9703506	168.2274252	99.88962932	106.4554358	89.91221475	5674.727993	9695.266979	-0.772672168	7.95E-12	4.03E-10	Ila04G006480	GWHBIST00000004	18831179	18845441	+	5115	protein_coding	- && sp|Q0WNJ6|CLAH1_ARATH Clathrin heavy chain 1 OS=Arabidopsis thaliana OX=3702 GN=CHC1 PE=1 SV=1 && PF09268:Clathrin, heavy-chain linker|PF00637:Region in Clathrin and VPS|PF13838:Clathrin-H-link|PF01394:Clathrin propeller repeat	-
Ila10G000630	9880	7637	7186	7481	6870	7154	347.972832	265.9151317	233.2785754	254.0313682	213.0313062	240.8760392	7006.856219	8384.870072	-0.259008164	0.135070997	0.276640387	Ila10G000630	GWHBIST00000010	556937	560515	-	2643	protein_coding	- && sp|O82150|FTSH_TOBAC ATP-dependent zinc metalloprotease FTSH, chloroplastic OS=Nicotiana tabacum OX=4097 GN=FTSH PE=2 SV=2 && PF17862:AAA+ lid domain|PF00004:ATPase family associated with various cellular activities (AAA)|PF01434:Peptidase family M41	AAA
Ila04G002500	7361	6707	5810	7851	8087	9312	344.4987027	310.3208435	250.626018	354.2542343	333.2241865	416.6294955	8223.878533	6744.154469	0.286210161	0.076954348	0.182261539	Ila04G002500	GWHBIST00000004	10955188	10961206	-	1989	protein_coding	- && sp|O48902|MDHP_MEDSA Malate dehydrogenase [NADP], chloroplastic OS=Medicago sativa OX=3879 GN=MDH1 PE=2 SV=1 && PF00056:lactate/malate dehydrogenase, NAD binding domain|PF02866:lactate/malate dehydrogenase, alpha/beta C-terminal domain	-
Ila18G018060	9295	8130	10470	7059	5051	5107	933.3729623	807.1016502	969.0624203	683.4209747	446.5617189	490.2616836	5624.586983	9406.005007	-0.741901651	4.95E-05	0.000447958	Ila18G018060	GWHBIST00000018	39425553	39428057	+	927	protein_coding	- && sp|O81355|PYRC5_PYRCO Phenylcoumaran benzylic ether reductase Pyrc5 OS=Pyrus communis OX=23211 GN=PYRC5 PE=1 SV=1 && PF05368:NmrA-like family	NmrA
Ila06G009790	8005	7400	6959	7239	7448	7963	357.2173862	326.4636557	286.2314411	311.4505687	292.6235133	339.7067999	7372.518314	7576.650132	-0.039384565	0.768222431	0.866043053	Ila06G009790	GWHBIST00000006	10728994	10734782	-	2086	protein_coding	- && sp|P37272|PSY_CAPAN Bifunctional 15-cis-phytoene synthase, chromoplastic OS=Capsicum annuum OX=4072 GN=PSY1 PE=1 SV=1 && PF00494:Squalene/phytoene synthase	-
Ila19G003260	5613	6551	6588	7703	10581	7521	214.6643988	247.6877051	232.2297322	284.0299777	356.2788131	274.9773	8342.722861	6331.030069	0.398125256	0.006051029	0.025445266	Ila19G003260	GWHBIST00000019	5249728	5253765	-	2434	protein_coding	- && sp|P27322|HSP72_SOLLC Heat shock cognate 70 kDa protein 2 OS=Solanum lycopersicum OX=4081 GN=HSC-2 PE=2 SV=1 && PF00012:Hsp70 protein	HSP70
Ila14G018960	7683	7649	8893	7344	6928	5968	297.2492493	292.5677567	317.1301069	273.9440682	235.9913651	220.7369411	6583.376471	8171.616298	-0.311834181	0.014254852	0.050390245	Ila14G018960	GWHBIST00000014	45212514	45222730	-	2406	protein_coding	- && sp|P32826|SCP49_ARATH Serine carboxypeptidase-like 49 OS=Arabidopsis thaliana OX=3702 GN=SCPL49 PE=2 SV=2 && PF00450:Serine carboxypeptidase	Peptidase_S10
Ila14G023170	8841	9989	6838	6664	4442	7664	948.1285443	1059.057919	675.9182551	689.0331536	419.4137705	785.7377149	6157.046249	8721.430583	-0.502353142	0.041014557	0.113661353	Ila14G023170	GWHBIST00000014	51628281	51629956	-	868	protein_coding	- && - && -	-
Ila10G003710	7554	7326	8451	7408	7221	6390	323.8938585	310.5449811	333.9897071	306.2428839	272.597192	261.9285648	6835.44367	7873.317888	-0.203974007	0.075590328	0.17993152	Ila10G003710	GWHBIST00000010	3720728	3727221	+	2171	protein_coding	- && sp|Q9FMH8|RD21B_ARATH Probable cysteine protease RD21B OS=Arabidopsis thaliana OX=3702 GN=RD21B PE=1 SV=1 && PF00112:Papain family cysteine protease|PF08246:Cathepsin propeptide inhibitor domain (I29)|PF00396:Granulin	Peptidase_C1
Ila18G019190	6703	7352	8249	7118	7234	7502	429.4268164	465.6475346	487.1026519	439.6602729	408.0343699	459.4658884	7112.543258	7520.724111	-0.080575826	0.479684475	0.650283204	Ila18G019190	GWHBIST00000018	40505177	40506916	+	1453	protein_coding	- && sp|Q9ZVX8|PIP28_ARATH Probable aquaporin PIP2-8 OS=Arabidopsis thaliana OX=3702 GN=PIP2-8 PE=1 SV=1 && PF00230:Major intrinsic protein	-
Ila13G002570	7734	7851	6373	6693	7301	8173	383.3488246	384.7218153	291.160955	319.8527528	318.6182272	387.2823809	7213.880052	7449.32453	-0.046305221	0.771928107	0.868320818	Ila13G002570	GWHBIST00000013	2827277	2843624	+	1878	protein_coding	- && sp|Q9LYA9|CP41A_ARATH Chloroplast stem-loop binding protein of 41 kDa a, chloroplastic OS=Arabidopsis thaliana OX=3702 GN=CSP41A PE=1 SV=1 && PF01370:NAD dependent epimerase/dehydratase family|PF08613:Cyclin	Epimerase
Ila18G004890	9250	10285	9880	7146	3886	3652	157.1541987	172.7509401	154.7178597	117.054083	58.12799622	59.31592358	4811.392967	9943.418102	-1.047337392	3.75E-05	0.000354457	Ila18G004890	GWHBIST00000018	6300395	6312484	+	5479	protein_coding	- && sp|Q9M1C7|AB9C_ARATH ABC transporter C family member 9 OS=Arabidopsis thaliana OX=3702 GN=ABCC9 PE=2 SV=2 && PF00005:ABC transporter|PF00664:ABC transporter transmembrane region	ABC_membrane
Ila12G005440	6200	6390	5020	9285	7373	9565	331.8773883	338.1572476	247.6788599	479.1893771	347.4789562	489.4712874	8571.008494	5976.364547	0.520203934	0.005283645	0.022878033	Ila12G005440	GWHBIST00000012	23584095	23585833	+	1739	protein_coding	- && sp|Q9ZS34|CHLP_TOBAC Geranylgeranyl diphosphate reductase, chloroplastic OS=Nicotiana tabacum OX=4097 GN=CHLP PE=2 SV=1 && PF07992:Pyridine nucleotide-disulphide oxidoreductase	Pyr_redox_2
Ila14G005150	5727	5502	4739	9584	8400	9873	337.4082151	320.465235	257.3442248	544.3955591	435.7185558	556.0756506	9089.339698	5415.167143	0.74719257	3.17E-06	4.18E-05	Ila14G005150	GWHBIST00000014	5939709	5942296	-	1580	protein_coding	- && sp|Q40459|PSBO_TOBAC Oxygen-evolving enhancer protein 1, chloroplastic OS=Nicotiana tabacum OX=4097 GN=PSBO PE=2 SV=1 && PF01716:Manganese-stabilising protein / photosystem II polypeptide	-
Ila09G001830	6811	7346	7361	6739	7837	7622	337.0603295	359.4012244	335.7629925	321.5374155	341.4639876	360.5968906	7210.223534	7270.986834	-0.012091163	0.909927855	0.951969372	Ila09G001830	GWHBIST00000009	1878325	1885201	+	1881	protein_coding	- && sp|F4IHJ0|SFH8_ARATH Phosphatidylinositol/phosphatidylcholine transfer protein SFH8 OS=Arabidopsis thaliana OX=3702 GN=SFH8 PE=2 SV=1 && PF03765:CRAL/TRIO, N-terminal domain|PF00650:CRAL/TRIO domain	CRAL_TRIO_N
Ila15G016160	7844	9415	8862	5642	6985	4794	249.8865779	296.5224205	260.2174033	173.2916855	195.9160677	146.002283	5637.608409	8826.388203	-0.646677652	1.72E-05	0.000180817	Ila15G016160	GWHBIST00000015	43272956	43279625	-	2922	protein_coding	- && sp|Q08IT1|DADIS_PANGI Dammarenediol II synthase OS=Panax ginseng OX=4054 GN=DDS PE=1 SV=1 && PF13243:Squalene-hopene cyclase C-terminal domain|PF13249:Squalene-hopene cyclase N-terminal domain	-
Ila20G001370	8179	7140	7563	6987	7248	6205	62.23759306	53.71340201	53.04518023	51.26047465	48.55892518	45.13886541	6640.584985	7741.769414	-0.221323725	0.072855903	0.175003607	Ila20G001370	GWHBIST00000020	1272770	1296026	+	12233	protein_coding	- && sp|Q8GY23|UPL1_ARATH E3 ubiquitin-protein ligase UPL1 OS=Arabidopsis thaliana OX=3702 GN=UPL1 PE=1 SV=3 && PF00632:HECT-domain (ubiquitin-transferase)|PF06025:Domain of Unknown Function (DUF913)|PF06012:Domain of Unknown Function (DUF908)|PF00627:UBA/TS-N domain|PF14377:Ubiquitin binding region	HECT
Ila05G005040	9320	7763	8500	6527	6056	5140	567.4060774	467.2394721	476.97569	383.1166116	324.6102562	299.155824	5765.231372	8655.274605	-0.586202795	7.36E-05	0.000625845	Ila05G005040	GWHBIST00000005	18657072	18660001	+	1529	protein_coding	- && sp|Q9SQ64|COR2_PAPSO Non-functional NADPH-dependent codeinone reductase 2 OS=Papaver somniferum OX=3469 GN=COR2 PE=1 SV=1 && PF00248:Aldo/keto reductase family	Aldo_ket_red
Ila20G005820	5214	6642	5998	10852	7279	7285	413.0653032	520.2096791	437.9791128	828.8897595	507.7123284	551.73879	8308.997754	6033.734337	0.461592772	0.023132126	0.073869249	Ila20G005820	GWHBIST00000020	5934771	5936054	+	1175	protein_coding	- && - && PF04832:SOUL heme-binding protein	-
Ila18G010150	4635	5878	6463	8828	10203	7259	155.0879906	194.4419106	199.3250285	284.793488	300.5762192	232.1996171	8517.499056	5718.01217	0.574902868	0.000298902	0.002066377	Ila18G010150	GWHBIST00000018	25596336	25601526	-	2782	protein_coding	- && sp|Q40401|CALR_NICPL Calreticulin OS=Nicotiana plumbaginifolia OX=4092 GN=CAL1 PE=2 SV=1 && PF00262:Calreticulin family	-
Ila15G023480	8916	8187	5933	6656	6115	7141	244.1050134	221.5967044	149.7201439	175.6949392	147.4013295	186.9054411	6493.531169	7835.779692	-0.271056082	0.170405652	0.326695724	Ila15G023480	GWHBIST00000015	56040878	56053651	+	3400	protein_coding	- && sp|Q94A08|RFS2_ARATH Probable galactinol--sucrose galactosyltransferase 2 OS=Arabidopsis thaliana OX=3702 GN=RFS2 PE=2 SV=2 && PF05691:Raffinose synthase or seed imbibition protein Sip1	-
Ila12G007660	7207	6541	4897	7638	7231	9358	336.4456552	301.8814442	210.7122355	343.7790094	297.2056518	417.6377193	7904.9041	6339.913687	0.318310551	0.11820392	0.250506745	Ila12G007660	GWHBIST00000012	26403071	26405064	-	1994	protein_coding	- && sp|Q40450|EFTUA_NICSY Elongation factor TuA, chloroplastic OS=Nicotiana sylvestris OX=4096 GN=TUFA PE=2 SV=2 && PF03144:Elongation factor Tu domain 2|PF00009:Elongation factor Tu GTP binding domain|PF03143:Elongation factor Tu C-terminal domain	GTP_EFTU
Ila05G004300	6047	5244	4345	8734	8350	9998	377.273848	323.4530746	249.8651933	525.3747788	458.6712392	596.3292854	8829.974265	5311.209243	0.733409959	5.57E-05	0.000492141	Ila05G004300	GWHBIST00000005	17093055	17096375	-	1492	protein_coding	- && sp|K4BW79|ENOX_SOLLC 2-methylene-furan-3-one reductase OS=Solanum lycopersicum OX=4081 GN=EO PE=1 SV=1 && PF13602:Zinc-binding dehydrogenase|PF08240:Alcohol dehydrogenase GroES-like domain	ADH_N
Ila12G008160	6636	7060	9056	7272	6766	5842	232.3130444	244.3451862	292.2152528	245.4485035	208.5439103	195.5172337	6467.468526	7656.029551	-0.243456851	0.102934527	0.225953127	Ila12G008160	GWHBIST00000012	27012481	27017398	+	2659	protein_coding	- && sp|P25861|G3PC_ANTMA Glyceraldehyde-3-phosphate dehydrogenase, cytosolic OS=Antirrhinum majus OX=4151 GN=GAPC PE=2 SV=1 && PF02800:Glyceraldehyde 3-phosphate dehydrogenase, C-terminal domain|PF00044:Glyceraldehyde 3-phosphate dehydrogenase, NAD binding domain	-
Ila15G001300	6932	6643	5110	6186	7439	10026	677.8087359	642.1621853	460.5414844	583.1735565	640.4149575	937.2006486	7703.351619	6347.640649	0.279290904	0.199903887	0.365809441	Ila15G001300	GWHBIST00000015	1552965	1556228	+	952	protein_coding	- && sp|Q39732|GCSH_FLAAN Glycine cleavage system H protein, mitochondrial OS=Flaveria anomala OX=35877 GN=GDCSH PE=2 SV=1 && PF01597:Glycine cleavage H-protein	-
Ila14G018310	7439	8880	10989	4803	6023	3877	311.7823717	367.9440895	424.5163481	194.0836199	222.2532708	155.3420639	4754.787843	9184.246232	-0.949752137	1.05E-07	2.07E-06	Ila14G018310	GWHBIST00000014	43744794	43747014	-	2221	protein_coding	- && sp|P37124|C77A2_SOLME Cytochrome P450 77A2 OS=Solanum melongena OX=4111 GN=CYP77A2 PE=2 SV=1 && PF00067:Cytochrome P450	p450
Ila16G010770	6600	6406	7449	7102	8427	5998	203.1644445	194.9497	211.3493868	210.7772514	228.3889372	176.5088572	6972.101782	6901.760598	0.014659747	0.913552773	0.954082882	Ila16G010770	GWHBIST00000016	28180525	28187514	+	3024	protein_coding	- && sp|Q05001|NCPR_CATRO NADPH--cytochrome P450 reductase OS=Catharanthus roseus OX=4058 GN=CPR PE=2 SV=1 && PF00667:FAD binding domain|PF00258:Flavodoxin|PF00175:Oxidoreductase NAD-binding domain	NAD_binding_1
Ila05G016200	6352	6344	5751	7680	7646	8083	300.6018754	296.8084345	250.8556069	350.4142152	318.5765393	365.6874427	7621.4927	6248.370274	0.286616553	0.025930219	0.080790647	Ila05G016200	GWHBIST00000005	32829583	32834240	+	1967	protein_coding	- && sp|O24339|CATA_SOLAP Catalase OS=Soldanella alpina OX=66308 PE=2 SV=1 && PF06628:Catalase-related immune-responsive|PF00199:Catalase	Catalase
Ila09G003090	8294	8471	10892	5682	3827	4602	938.1013308	947.2230774	1135.514285	619.6211735	381.1031017	497.6094366	4617.83878	9310.172999	-1.011691695	1.18E-07	2.29E-06	Ila09G003090	GWHBIST00000009	3167607	3170604	+	823	protein_coding	- && sp|Q43095|CAMT_POPTM Caffeoyl-CoA O-methyltransferase OS=Populus tremuloides OX=3693 PE=2 SV=1 && PF01596:O-methyltransferase	-
Ila02G006820	7274	8378	5574	6214	6771	7492	433.2113983	493.2860136	305.9798244	356.8100897	355.040333	426.5604828	6663.285255	7213.869224	-0.114505381	0.548283523	0.70951784	Ila02G006820	GWHBIST00000002	16581484	16590408	-	1563	protein_coding	- && sp|Q43843|RPE_SOLTU Ribulose-phosphate 3-epimerase, chloroplastic (Fragment) OS=Solanum tuberosum OX=4113 PE=1 SV=1 && PF00834:Ribulose-phosphate 3 epimerase family	-
Ila08G015630	6632	9486	14725	3182	3942	3321	322.0386229	455.3846959	659.0494399	148.9714065	168.5304434	154.1659954	3386.01411	10312.16581	-1.606701629	5.34E-12	2.78E-10	Ila08G015630	GWHBIST00000008	35652442	35655613	+	1917	protein_coding	- && sp|A7NVX9|METK2_VITVI S-adenosylmethionine synthase 2 OS=Vitis vinifera OX=29760 GN=METK2 PE=3 SV=1 && PF02773:S-adenosylmethionine synthetase, C-terminal domain|PF00438:S-adenosylmethionine synthetase, N-terminal domain|PF02772:S-adenosylmethionine synthetase, central domain	-
Ila10G007410	5639	7388	9881	5419	8015	4907	122.9017535	159.1896175	198.4979987	113.871341	153.8005228	102.2417596	5916.437456	7686.597	-0.377603957	0.078995458	0.185805203	Ila10G007410	GWHBIST00000010	9977289	9985267	-	4271	protein_coding	- && sp|O48947|CESA2_ARATH Cellulose synthase A catalytic subunit 2 [UDP-forming] OS=Arabidopsis thaliana OX=3702 GN=CESA2 PE=1 SV=1 && -	-
Ila15G018730	6644	9355	14322	3297	3435	4141	185.8927187	258.7667163	369.3479333	88.93874605	84.61703372	110.7628848	3542.326204	10141.71769	-1.517594093	1.45E-10	5.48E-09	Ila15G018730	GWHBIST00000015	49315721	49325140	+	3327	protein_coding	- && sp|Q8LPK5|CESA8_ARATH Cellulose synthase A catalytic subunit 8 [UDP-forming] OS=Arabidopsis thaliana OX=3702 GN=CESA8 PE=1 SV=1 && PF03552:Cellulose synthase|PF14569:Zinc-binding RING-finger	-
Ila11G011080	7050	7081	5556	6085	7208	8061	391.5621089	388.8105172	284.4284453	325.8452722	352.4719978	428.0127787	6943.670483	6683.021743	0.055239124	0.752404375	0.856979177	Ila11G011080	GWHBIST00000011	28387757	28393355	-	1676	protein_coding	- && sp|P29344|RR1_SPIOL 30S ribosomal protein S1, chloroplastic OS=Spinacia oleracea OX=3562 GN=RPS1 PE=1 SV=1 && PF00575:S1 RNA binding domain	S1
Ila17G025080	5996	6360	5477	6735	8029	8318	282.6051556	296.3517113	237.9361585	306.0520944	333.1794557	374.7948759	7499.749424	6041.748854	0.311925225	0.028305601	0.085984798	Ila17G025080	GWHBIST00000017	47664651	47667983	-	1975	protein_coding	- && sp|Q8LB72|PHR2_ARATH Blue-light photoreceptor PHR2 OS=Arabidopsis thaliana OX=3702 GN=PHR2 PE=2 SV=2 && PF00875:DNA photolyase	-
Ila14G019280	7246	8161	10696	4619	5385	4552	258.7276565	288.0844192	352.0182404	159.0126908	169.2889194	155.3828385	4722.082124	8775.040378	-0.89400516	1.17E-09	3.65E-08	Ila14G019280	GWHBIST00000014	46060630	46066092	-	2607	protein_coding	- && sp|Q50EX7|PAL1_PETHY Phenylalanine ammonia-lyase 1 OS=Petunia hybrida OX=4102 GN=PAL1 PE=1 SV=1 && PF00221:Aromatic amino acid lyase	-
Ila02G005770	4788	4647	3725	7932	10618	8936	77.25723466	74.12924166	55.40009925	123.3976879	150.8433047	137.8429153	8902.594138	4467.383754	0.994902752	1.49E-09	4.54E-08	Ila02G005770	GWHBIST00000002	14958363	14974585	+	5769	protein_coding	- && sp|F4JKH6|TSS_ARATH Protein TSS OS=Arabidopsis thaliana OX=3702 GN=TSS PE=1 SV=1 && PF13424:Tetratricopeptide repeat|PF12807:Translation initiation factor eIF3 subunit 135	-
Ila01G001440	5355	4778	4809	7758	8882	8555	158.8517824	140.1233882	131.4881583	221.8818058	231.9752685	242.6101147	8184.345994	5058.473503	0.694229572	1.28E-08	3.10E-07	Ila01G001440	GWHBIST00000001	1496765	1506890	+	3138	protein_coding	- && sp|Q8H0S9|PSA_ARATH Puromycin-sensitive aminopeptidase OS=Arabidopsis thaliana OX=3702 GN=MPA1 PE=2 SV=1 && PF11940:Domain of unknown function (DUF3458) Ig-like fold|PF17432:Domain of unknown function (DUF3458_C) ARM repeats|PF17900:Peptidase M1 N-terminal domain|PF01433:Peptidase family M1 domain	-
Ila12G001480	5990	5751	6207	7765	7248	7095	233.4952532	221.6289398	223.0140515	291.831383	248.7526515	264.3990595	7198.656692	6064.331597	0.247343463	0.029474878	0.088726516	Ila12G001480	GWHBIST00000012	12219386	12231148	-	2388	protein_coding	- && sp|Q01859|ATPBM_ORYSJ ATP synthase subunit beta, mitochondrial OS=Oryza sativa subsp. japonica OX=39947 GN=ATPB PE=1 SV=2 && PF02874:ATP synthase alpha/beta family, beta-barrel domain|PF11421:ATP synthase F1 beta subunit|PF00006:ATP synthase alpha/beta family, nucleotide-binding domain	ATP-synt_ab
Ila20G000490	6156	7969	7647	6688	6394	5166	155.7171149	199.284459	178.290448	163.1072635	142.3995673	124.9247278	5931.742702	7349.254477	-0.30915668	0.045617291	0.122663589	Ila20G000490	GWHBIST00000020	476776	486728	-	3680	protein_coding	- && sp|Q9ASR1|EF2_ARATH Elongation factor 2 OS=Arabidopsis thaliana OX=3702 GN=LOS1 PE=1 SV=1 && PF03144:Elongation factor Tu domain 2|PF03764:Elongation factor G, domain IV|PF02365:No apical meristem (NAM) protein|PF14492:Elongation Factor G, domain II|PF00009:Elongation factor Tu GTP binding domain|PF00679:Elongation factor G C-terminus	GTP_EFTU
Ila01G009750	7521	6201	4985	5747	6004	9002	601.4619592	490.2596771	367.44893	443.1115522	422.7382641	688.2208995	6774.139526	6360.473116	0.090917369	0.698875368	0.822007116	Ila01G009750	GWHBIST00000001	13805565	13806728	+	1164	protein_coding	- && sp|P31853|ATPF2_SPIOL ATP synthase subunit b', chloroplastic OS=Spinacia oleracea OX=3562 GN=ATPF2 PE=1 SV=2 && PF00430:ATP synthase B/B' CF(0)	-
Ila05G011700	6040	6860	5535	7836	6232	6857	234.6581709	263.4842899	198.205461	293.5164657	213.1692157	254.676671	6831.382332	6248.035348	0.128765581	0.445705466	0.622491633	Ila05G011700	GWHBIST00000005	28246147	28249741	-	2396	protein_coding	- && sp|P93111|HEM11_CUCSA Glutamyl-tRNA reductase 1, chloroplastic OS=Cucumis sativus OX=3659 GN=HEMA1 PE=2 SV=1 && PF00745:Glutamyl-tRNAGlu reductase, dimerisation domain|PF01488:Shikimate / quinate 5-dehydrogenase|PF05201:Glutamyl-tRNAGlu reductase, N-terminal domain	-
Ila13G012340	4919	5288	4338	6752	8824	9110	526.3118231	559.3576959	427.8141056	696.5271295	831.2470235	931.8391503	8013.393442	4930.91322	0.700622067	1.81E-05	0.000188721	Ila13G012340	GWHBIST00000013	25847080	25849620	+	870	protein_coding	- && sp|Q949Q5|PSAO_ARATH Photosystem I subunit O OS=Arabidopsis thaliana OX=3702 GN=PSAO PE=1 SV=1 && -	-
Ila04G009250	7407	8322	10425	4292	4972	3747	406.5388487	451.563975	527.3938005	227.1217475	240.2642353	196.6073157	4217.158504	8799.575061	-1.061155151	8.48E-13	5.26E-11	Ila04G009250	GWHBIST00000004	21455413	21459629	-	1696	protein_coding	- && sp|Q9FF86|DCR_ARATH BAHD acyltransferase DCR OS=Arabidopsis thaliana OX=3702 GN=DCR PE=2 SV=1 && PF02458:Transferase family	-
Ila16G001320	6794	7338	5516	5931	6137	7364	366.2003552	391.0234414	274.0417452	308.2197346	291.2377332	379.4576134	6330.933288	6669.499197	-0.075139702	0.671767584	0.803480604	Ila16G001320	GWHBIST00000016	1326148	1331009	-	1727	protein_coding	- && sp|P54260|GCST_SOLTU Aminomethyltransferase, mitochondrial OS=Solanum tuberosum OX=4113 GN=GDCST PE=2 SV=1 && PF01571:Aminomethyltransferase folate-binding domain|PF08669:Glycine cleavage T-protein C-terminal barrel domain	GCV_T
Ila03G006120	6083	7169	7221	4904	8689	4985	232.9262388	271.388253	254.8573663	181.0465938	292.9332667	182.4828405	5976.203733	6911.231492	-0.209640473	0.301239944	0.482879404	Ila03G006120	GWHBIST00000003	15851559	15854942	+	2431	protein_coding	- && sp|P45726|PALY_CAMSI Phenylalanine ammonia-lyase OS=Camellia sinensis OX=4442 GN=PAL PE=2 SV=1 && PF00221:Aromatic amino acid lyase	-
Ila07G009560	9479	8867	8797	4949	3025	3161	414.645022	383.462155	354.6890434	208.7231815	116.5031349	132.1888124	3645.125862	9186.594522	-1.333637519	6.04E-10	2.01E-08	Ila07G009560	GWHBIST00000007	24104344	24108791	+	2128	protein_coding	- && sp|Q8RX77|PTR21_ARATH Protein NRT1/ PTR FAMILY 2.13 OS=Arabidopsis thaliana OX=3702 GN=NPF2.13 PE=1 SV=1 && PF00854:POT family	-
Ila18G006190	5774	6654	7853	5637	6422	5932	130.0459796	148.161312	163.0252958	122.407347	127.3470099	127.7254865	5842.376649	6829.098322	-0.225186492	0.074019426	0.17713783	Ila18G006190	GWHBIST00000018	8233672	8242771	-	4133	protein_coding	- && sp|Q941L0|CESA3_ARATH Cellulose synthase A catalytic subunit 3 [UDP-forming] OS=Arabidopsis thaliana OX=3702 GN=CESA3 PE=1 SV=2 && PF03552:Cellulose synthase|PF14569:Zinc-binding RING-finger	-
Ila06G002960	5465	4787	4492	7280	7787	8254	155.0491866	134.2686496	117.4676612	199.1361033	194.5126276	223.8721462	7587.317457	4998.066979	0.602272922	3.06E-05	0.000297914	Ila06G002960	GWHBIST00000006	2891986	2899911	-	3281	protein_coding	- && sp|Q9LF37|CLPB3_ARATH Chaperone protein ClpB3, chloroplastic OS=Arabidopsis thaliana OX=3702 GN=CLPB3 PE=1 SV=1 && PF02861:Clp amino terminal domain, pathogenicity island component|PF10431:C-terminal, D2-small domain, of ClpB protein|PF17871:AAA lid domain|PF07724:AAA domain (Cdc48 subfamily)|PF00004:ATPase family associated with various cellular activities (AAA)	Clp_N
Ila19G008720	6516	5837	6951	5831	7418	5475	161.1022668	142.6731128	158.4043532	138.9961966	161.4751531	129.4079542	6060.966698	6516.377839	-0.104466495	0.431196463	0.60994097	Ila19G008720	GWHBIST00000019	23951448	23956351	+	3765	protein_coding	- && sp|Q9SJ56|BLH1_ARATH BEL1-like homeodomain protein 1 OS=Arabidopsis thaliana OX=3702 GN=BLH1 PE=1 SV=1 && PF07526:Associated with HOX|PF05920:Homeobox KN domain	POX
Ila17G010470	5692	4982	3781	7020	7799	8605	269.3680533	233.086321	164.925239	320.3004936	324.9514033	389.3035315	7620.588378	4915.952481	0.632496436	0.001086345	0.006230296	Ila17G010470	GWHBIST00000017	22159643	22165101	-	1967	protein_coding	- && sp|Q8W496|PTC52_ARATH Protochlorophyllide-dependent translocon component 52, chloroplastic OS=Arabidopsis thaliana OX=3702 GN=PTC52 PE=2 SV=1 && PF00355:Rieske [2Fe-2S] domain|PF08417:Pheophorbide a oxygenase	-
Ila10G003640	4709	4681	4255	7124	8008	8981	164.6668568	161.8258936	137.1438439	240.182143	246.5470837	300.2330332	7844.988963	4621.853106	0.763342858	1.37E-07	2.62E-06	Ila10G003640	GWHBIST00000010	3625352	3632252	-	2662	protein_coding	- && sp|P42731|PABP2_ARATH Polyadenylate-binding protein 2 OS=Arabidopsis thaliana OX=3702 GN=PAB2 PE=1 SV=1 && PF00658:Poly-adenylate binding protein, unique domain|PF00076:RNA recognition motif. (a.k.a. RRM, RBD, or RNP domain)	RRM_1
Ila17G013640	5353	5927	6486	6379	6663	6744	124.5415448	136.3276033	139.0891322	143.0898757	136.485061	149.9998549	6436.321358	5992.577014	0.102992521	0.347458805	0.531363099	Ila17G013640	GWHBIST00000017	32532850	32542893	-	4001	protein_coding	- && sp|Q9ZVD5|AGO4_ARATH Protein argonaute 4 OS=Arabidopsis thaliana OX=3702 GN=AGO4 PE=1 SV=2 && PF16486:N-terminal domain of argonaute|PF02170:PAZ domain|PF16488:Argonaute linker 2 domain|PF08699:Argonaute linker 1 domain|PF02171:Piwi domain	Piwi
Ila17G007690	6285	5870	4577	6393	6695	7725	320.0476531	295.5148664	214.8273275	313.8725739	300.1637527	376.0660472	6777.7676	5684.451981	0.253831614	0.158686864	0.310582621	Ila17G007690	GWHBIST00000017	11137305	11143137	+	1828	protein_coding	- && sp|P05414|GOX_SPIOL Peroxisomal (S)-2-hydroxy-acid oxidase OS=Spinacia oleracea OX=3562 PE=1 SV=1 && PF01070:FMN-dependent dehydrogenase	FMN_dh
Ila01G005360	5665	5373	4377	6887	7283	7609	121.3935617	113.8267793	86.45130127	142.286967	137.4055737	155.8761233	7085.603151	5232.785988	0.437373036	0.005638341	0.024045652	Ila01G005360	GWHBIST00000001	5985389	6005628	-	4344	protein_coding	- && sp|Q40983|SPP_PEA Stromal processing peptidase, chloroplastic OS=Pisum sativum OX=3888 GN=SPP PE=1 SV=2 && PF00675:Insulinase (Peptidase family M16)|PF05193:Peptidase M16 inactive domain	-
Ila17G026100	4950	4490	3483	7147	8217	8832	147.1190805	131.9295288	95.41497168	204.7985533	215.0182832	250.9453401	7867.209205	4391.993815	0.841054343	4.15E-06	5.28E-05	Ila17G026100	GWHBIST00000017	48565436	48586277	+	3132	protein_coding	- && sp|Q41062|SECA_PEA Protein translocase subunit SecA, chloroplastic OS=Pisum sativum OX=3888 GN=SecA PE=1 SV=1 && PF07517:SecA DEAD-like domain|PF07516:SecA Wing and Scaffold domain|PF01043:SecA preprotein cross-linking domain	-
Ila17G024880	4957	4862	4390	7960	6973	7785	95.59323882	92.69473762	78.03187204	147.9996283	118.3930538	143.523543	7409.736903	4814.056845	0.622182145	2.03E-05	0.000209039	Ila17G024880	GWHBIST00000017	47488846	47493672	-	4827	protein_coding	- && sp|O81283|TC159_ARATH Translocase of chloroplast 159, chloroplastic OS=Arabidopsis thaliana OX=3702 GN=TOC159 PE=1 SV=1 && PF11886:Translocase of chloroplast 159/132, membrane anchor domain|PF04548:AIG1 family	-
Ila13G009510	5618	4923	4342	7110	6955	7887	305.4664591	264.6326948	217.6059988	372.7268647	332.9486286	409.9679526	7152.527876	5050.074989	0.50218855	0.001971846	0.010158005	Ila13G009510	GWHBIST00000013	21182880	21192480	+	1712	protein_coding	- && sp|Q9FY06|PPF1_PEA Inner membrane protein PPF-1, chloroplastic OS=Pisum sativum OX=3888 GN=PPF-1 PE=2 SV=2 && PF02096:60Kd inner membrane protein	-
Ila12G006930	5041	4918	4833	8309	6591	7113	227.1286588	219.0663292	200.7110499	360.9468845	261.4597556	306.3827572	7185.846676	5004.974881	0.521771308	0.000562249	0.00356296	Ila12G006930	GWHBIST00000012	25364959	25370223	+	2066	protein_coding	- && sp|Q9SU63|AL2B4_ARATH Aldehyde dehydrogenase family 2 member B4, mitochondrial OS=Arabidopsis thaliana OX=3702 GN=ALDH2B4 PE=1 SV=1 && PF00171:Aldehyde dehydrogenase family	Aldedh
Ila06G000540	6213	11615	8606	5696	3255	1395	358.1082969	661.8569159	457.2077883	316.5354167	165.1818488	76.86763328	3378.252427	8933.759733	-1.402999676	0.019796003	0.065386808	Ila06G000540	GWHBIST00000006	617428	620586	-	1615	protein_coding	- && sp|Q9SGA2|GDPD1_ARATH Glycerophosphodiester phosphodiesterase GDPD1, chloroplastic OS=Arabidopsis thaliana OX=3702 GN=GDPD1 PE=1 SV=1 && PF03009:Glycerophosphoryl diester phosphodiesterase family	-
Ila09G000850	6555	6340	6953	5541	6003	5170	93.98958696	89.87277892	91.89217329	76.60100979	75.78333068	70.86860116	5427.5781	6703.962272	-0.304687948	0.002348235	0.011752328	Ila09G000850	GWHBIST00000009	826524	836376	-	6492	protein_coding	- && sp|Q6WWW4|UPL3_ARATH E3 ubiquitin-protein ligase UPL3 OS=Arabidopsis thaliana OX=3702 GN=UPL3 PE=1 SV=1 && PF00632:HECT-domain (ubiquitin-transferase)	HECT
Ila19G013440	5823	5960	5583	5952	6106	6998	187.0397723	189.2628181	165.2928437	184.3271877	172.6800935	214.8905837	6206.506816	5877.650468	0.078538984	0.559686591	0.717700088	Ila19G013440	GWHBIST00000019	31301511	31324912	+	2898	protein_coding	- && sp|Q8W488|DTX21_ARATH Protein DETOXIFICATION 21 OS=Arabidopsis thaliana OX=3702 GN=DTX21 PE=1 SV=1 && PF01554:MatE	MatE
Ila09G019120	6877	7656	7224	4530	4093	5544	180.2235846	198.3564794	174.4976509	114.4590404	94.43927491	138.8967529	4626.22506	7356.809278	-0.669310551	4.75E-05	0.0004332	Ila09G019120	GWHBIST00000009	37039761	37051293	+	3552	protein_coding	- && sp|A0A0G3VTN5|LHY_PETHY Protein LATE ELONGATED HYPOCOTYL OS=Petunia hybrida OX=4102 GN=LHY PE=2 SV=1 && PF00249:Myb-like DNA-binding domain	Myb_DNA-binding
Ila08G011150	8095	8903	8416	4086	3486	2910	365.260897	397.1500021	350.0187452	177.7558859	138.4879579	125.5265491	3412.920835	8594.134809	-1.332383654	6.18E-17	7.51E-15	Ila08G011150	GWHBIST00000008	30845469	30849705	-	2063	protein_coding	- && sp|A7KTC5|PHT11_PETHY Low affinity inorganic phosphate transporter 1 OS=Petunia hybrida OX=4102 GN=PT1 PE=2 SV=1 && PF00083:Sugar (and other) transporter	Sugar_tr
Ila11G011170	5872	6967	5610	5949	5189	6255	279.8783854	328.2925226	246.4594203	273.3799007	217.75357	285.0144634	5676.454086	6250.444801	-0.138989121	0.397311007	0.578950974	Ila11G011170	GWHBIST00000011	28448084	28451570	-	1953	protein_coding	- && sp|Q9M5K3|DLDH1_ARATH Dihydrolipoyl dehydrogenase 1, mitochondrial OS=Arabidopsis thaliana OX=3702 GN=LPD1 PE=1 SV=2 && PF02852:Pyridine nucleotide-disulphide oxidoreductase, dimerisation domain|PF07992:Pyridine nucleotide-disulphide oxidoreductase	Pyr_redox_2
Ila16G013620	5690	7510	8032	4434	5758	4368	181.2045119	236.4441348	235.7651932	136.1418755	161.4457815	132.982852	4713.065508	7152.329681	-0.601717706	0.000117388	0.000932789	Ila16G013620	GWHBIST00000016	37163254	37170180	-	2923	protein_coding	- && sp|P21616|AVP_VIGRR Pyrophosphate-energized vacuolar membrane proton pump OS=Vigna radiata var. radiata OX=3916 PE=1 SV=4 && PF03030:Inorganic H+ pyrophosphatase	-
Ila16G024820	4959	5198	4055	5620	6674	8829	370.7748886	384.2238749	279.4514142	405.1275894	439.3399612	631.0793855	6879.434822	4822.911695	0.512416153	0.012086495	0.04441356	Ila16G024820	GWHBIST00000016	52913819	52916722	-	1245	protein_coding	- && sp|Q6QPJ6|PRXQ_POPJC Peroxiredoxin Q, chloroplastic OS=Populus jackii OX=640484 GN=PRXQ PE=1 SV=1 && PF00578:AhpC/TSA family	-
Ila20G002940	5540	4934	5598	7516	5625	5980	244.9871022	215.7071142	228.1737072	320.4494474	219.0051275	252.8080579	6245.276248	5430.232733	0.201696407	0.220583418	0.391209095	Ila20G002940	GWHBIST00000020	2705905	2713317	-	2105	protein_coding	- && sp|F6H9A9|THI41_VITVI Thiamine thiazole synthase 1, chloroplastic OS=Vitis vinifera OX=29760 GN=THI1-1 PE=3 SV=1 && PF01946:Thi4 family	-
Ila17G018660	4475	4893	3374	6617	6846	8435	211.5596694	228.6898678	147.022623	301.6062065	284.954182	381.2248475	7136.004067	4330.275322	0.720709344	0.000254191	0.001801028	Ila17G018660	GWHBIST00000017	40845598	40848821	+	1969	protein_coding	- && sp|Q9STF2|PTA16_ARATH Protein PLASTID TRANSCRIPTIONALLY ACTIVE 16, chloroplastic OS=Arabidopsis thaliana OX=3702 GN=PTAC16 PE=1 SV=1 && PF13460:NAD(P)H-binding	-
Ila11G003290	5612	7156	9437	4072	4423	3886	266.3947274	335.8227874	412.8964663	186.3609997	184.8515949	176.3465758	4021.045902	7454.573195	-0.89060477	2.31E-07	4.18E-06	Ila11G003290	GWHBIST00000011	15279585	15283086	+	1961	protein_coding	- && sp|O23254|GLYC4_ARATH Serine hydroxymethyltransferase 4 OS=Arabidopsis thaliana OX=3702 GN=SHM4 PE=1 SV=1 && PF00464:Serine hydroxymethyltransferase	SHMT
Ila17G012090	5064	4980	5000	6148	7054	6153	61.33083438	59.62747053	55.81544979	71.78907119	75.21750639	71.24073042	6281.735645	5088.016921	0.304138985	0.003206475	0.015173169	Ila17G012090	GWHBIST00000017	28426082	28470242	+	7686	protein_coding	- && sp|F4IHS2|SYD_ARATH Chromatin structure-remodeling complex protein SYD OS=Arabidopsis thaliana OX=3702 GN=SYD PE=1 SV=1 && PF00176:SNF2 family N-terminal domain|PF00271:Helicase conserved C-terminal domain|PF14619:Snf2-ATP coupling, chromatin remodelling complex	SNF2_N
Ila05G015450	3651	3977	4177	7569	9607	5377	124.4444948	134.0143532	131.2283233	248.7377267	288.3035214	175.2105145	7284.262923	3985.365797	0.870108254	3.21E-06	4.23E-05	Ila05G015450	GWHBIST00000005	32174107	32188401	-	2731	protein_coding	- && sp|P35016|ENPL_CATRO Endoplasmin homolog OS=Catharanthus roseus OX=4058 GN=HSP90 PE=2 SV=1 && PF02518:Histidine kinase-, DNA gyrase B-, and HSP90-like ATPase|PF00183:Hsp90 protein	HATPase_c
Ila09G011940	6222	7075	4965	5070	4846	6169	340.6956916	382.9966247	250.5850378	267.6602589	233.6244784	322.9294682	5247.100677	6202.430545	-0.241305226	0.212712925	0.381363535	Ila09G011940	GWHBIST00000009	27092354	27097299	-	1700	protein_coding	- && sp|Q9LHH5|LNK3_ARATH Protein LNK3 OS=Arabidopsis thaliana OX=3702 GN=LNK3 PE=1 SV=1 && -	-
Ila15G015200	5973	6362	7926	4282	6253	3352	333.7360135	351.427782	408.1914236	230.6728713	307.6077606	179.0485637	4475.317839	6821.292297	-0.607994109	0.002637577	0.012929702	Ila15G015200	GWHBIST00000015	40243230	40245460	-	1666	protein_coding	- && sp|P0CG85|UBI1P_NICSY Polyubiquitin OS=Nicotiana sylvestris OX=4096 GN=UBI11 PE=2 SV=1 && PF00240:Ubiquitin family	ubiquitin
Ila17G000400	5710	5830	6335	5835	5667	4626	143.7324266	145.08385	146.9821234	141.6115933	125.5943672	111.3218846	5241.977104	6035.078432	-0.203278785	0.113532315	0.243094818	Ila17G000400	GWHBIST00000017	566323	571712	+	3698	protein_coding	- && sp|Q9ASR1|EF2_ARATH Elongation factor 2 OS=Arabidopsis thaliana OX=3702 GN=LOS1 PE=1 SV=1 && PF14492:Elongation Factor G, domain II|PF00009:Elongation factor Tu GTP binding domain|PF03764:Elongation factor G, domain IV|PF03144:Elongation factor Tu domain 2|PF00679:Elongation factor G C-terminus	GTP_EFTU
Ila18G001390	7923	8177	7585	2653	3732	3900	438.7402705	447.6552768	387.1441279	141.6427638	181.9523957	206.4613307	3336.723732	8016.975808	-1.264576288	1.80E-14	1.48E-12	Ila18G001390	GWHBIST00000018	1475640	1482305	-	1681	protein_coding	- && sp|Q76MX2|CAS1_SOLTU Bifunctional L-3-cyanoalanine synthase/cysteine synthase 1, mitochondrial OS=Solanum tuberosum OX=4113 GN=PCAS-1 PE=1 SV=1 && PF00291:Pyridoxal-phosphate dependent enzyme	PALP
Ila15G019570	3104	3237	2586	7475	8001	9198	169.7648262	175.0251939	130.3628269	394.1635829	385.2729968	480.9231445	8033.123663	3028.469972	1.407461211	8.23E-18	1.15E-15	Ila15G019570	GWHBIST00000015	50927470	50929930	-	1702	protein_coding	- && sp|O22436|CHLI_TOBAC Magnesium-chelatase subunit ChlI, chloroplastic OS=Nicotiana tabacum OX=4097 GN=CHLI PE=2 SV=1 && PF17863:AAA lid domain|PF01078:Magnesium chelatase, subunit ChlI	-
Ila02G009750	2626	1818	2903	8617	10100	7482	80.67475394	55.21647452	82.20329236	255.2338786	273.1886183	219.7439384	8489.287262	2474.67268	1.778359784	2.07E-22	5.27E-20	Ila02G009750	GWHBIST00000002	20100139	20103508	+	3030	protein_coding	- && sp|P42730|CLPB1_ARATH Chaperone protein ClpB1 OS=Arabidopsis thaliana OX=3702 GN=CLPB1 PE=1 SV=2 && PF07724:AAA domain (Cdc48 subfamily)|PF10431:C-terminal, D2-small domain, of ClpB protein	-
Ila07G007190	5456	5717	5614	5542	4898	6151	126.4323139	130.9736058	119.909994	123.8196424	99.93113164	136.2654403	5415.695936	5675.93397	-0.06777004	0.64480036	0.78305327	Ila07G007190	GWHBIST00000007	21408395	21423086	+	4017	protein_coding	- && sp|Q8GVE8|CAPP4_ARATH Phosphoenolpyruvate carboxylase 4 OS=Arabidopsis thaliana OX=3702 GN=PPC4 PE=2 SV=1 && PF00311:Phosphoenolpyruvate carboxylase	-
Ila17G009680	1816	1363	1431	11241	8159	9242	145.2273525	107.7606741	105.4803247	866.7160186	574.4706023	706.5693793	9361.992775	1562.55092	2.582998328	8.57E-40	1.81E-36	Ila17G009680	GWHBIST00000017	15242294	15244403	-	1164	protein_coding	- && sp|Q41249|PORA_CUCSA Protochlorophyllide reductase, chloroplastic OS=Cucumis sativus OX=3659 GN=PORA PE=2 SV=1 && PF00106:short chain dehydrogenase	adh_short
Ila05G009760	5169	4921	4183	5652	5458	7842	585.3562649	550.9332342	436.6172116	617.0994955	544.1837514	848.9788068	6188.065083	4841.781238	0.353957225	0.072413508	0.174374495	Ila05G009760	GWHBIST00000005	25845306	25850693	+	822	protein_coding	- && sp|P32980|ATPD_TOBAC ATP synthase delta chain, chloroplastic OS=Nicotiana tabacum OX=4097 GN=ATPD PE=2 SV=1 && PF00213:ATP synthase delta (OSCP) subunit	-
Ila06G011460	4882	4379	4221	7157	6031	6435	107.9959826	95.76716647	86.06457445	152.6441419	117.4620169	136.0863759	6400.85588	4567.158009	0.486972809	0.001304885	0.007197044	Ila06G011460	GWHBIST00000006	14857284	14892895	+	4208	protein_coding	- && sp|Q9FKP4|KN14B_ARATH Kinesin-like protein KIN-14B OS=Arabidopsis thaliana OX=3702 GN=KIN14B PE=1 SV=1 && PF00225:Kinesin motor domain	Kinesin
Ila18G011720	5086	6855	9927	3362	4348	3382	147.3045086	196.2813383	265.0067611	93.88078069	110.8734393	93.64175822	3591.444984	7324.920674	-1.028259881	1.03E-06	1.55E-05	Ila18G011720	GWHBIST00000018	30277252	30282041	+	3214	protein_coding	- && sp|Q38890|GUN25_ARATH Endoglucanase 25 OS=Arabidopsis thaliana OX=3702 GN=KOR PE=1 SV=1 && PF00759:Glycosyl hydrolase family 9	-
Ila17G013800	4625	5729	4152	5851	5853	6275	221.4629256	271.2064322	183.2508041	270.1212142	246.75509	287.2495111	5853.972065	4920.645091	0.250604494	0.134795927	0.276227411	Ila17G013800	GWHBIST00000017	32928826	32932215	-	1944	protein_coding	- && sp|O82392|THIC_ARATH Phosphomethylpyrimidine synthase, chloroplastic OS=Arabidopsis thaliana OX=3702 GN=THIC PE=1 SV=1 && PF01964:Radical SAM ThiC family	-
Ila17G025190	5293	5218	4250	5635	5787	6155	146.3336933	142.6193268	108.3005391	150.2019807	140.8621207	162.6772302	5721.130286	5008.887686	0.191861902	0.212859773	0.38147933	Ila17G025190	GWHBIST00000017	47751963	47761161	+	3367	protein_coding	- && sp|P0DKG8|RSH1L_ARATH Putative GTP diphosphokinase RSH1, chloroplastic OS=Arabidopsis thaliana OX=3702 GN=RSH1 PE=1 SV=1 && PF13328:HD domain|PF02824:TGS domain|PF04607:Region found in RelA / SpoT proteins	-
Ila15G023360	6387	5556	5261	5700	4417	4900	224.7795493	193.3098503	170.6583059	193.4078223	136.86285	164.8588372	4904.275598	5831.567195	-0.249870424	0.147010581	0.293199239	Ila15G023360	GWHBIST00000015	55848481	55853804	-	2645	protein_coding	- && sp|Q651X6|CSLE6_ORYSJ Cellulose synthase-like protein E6 OS=Oryza sativa subsp. japonica OX=39947 GN=CSLE6 PE=2 SV=1 && PF03552:Cellulose synthase	-
Ila18G001450	4970	5123	4111	5466	6071	6288	181.6406302	185.1027346	138.4851917	192.6041046	195.3507776	219.6976526	5795.816663	4818.892243	0.266378054	0.080402399	0.188160115	Ila18G001450	GWHBIST00000018	1537923	1546807	-	2547	protein_coding	- && sp|Q8GX78|ANTR2_ARATH Ascorbate transporter, chloroplastic OS=Arabidopsis thaliana OX=3702 GN=PHT4;4 PE=1 SV=1 && PF07690:Major Facilitator Superfamily	MFS_1
Ila17G019430	5239	4378	4141	6210	5965	5939	545.5021114	450.6669005	397.4225599	623.4174252	546.8356069	591.177144	5897.029921	4665.556039	0.337985838	0.025539772	0.079908185	Ila17G019430	GWHBIST00000017	41640853	41641785	+	894	protein_coding	- && sp|Q39963|PDX1_HEVBR Probable pyridoxal 5'-phosphate synthase subunit PDX1 OS=Hevea brasiliensis OX=3981 GN=PDX1 PE=2 SV=1 && PF01680:SOR/SNZ family	-
Ila09G002380	4315	4363	2935	5400	6583	8009	169.7663518	169.7023657	106.4334574	204.8348628	228.0305166	301.2349664	6504.299777	3950.796963	0.719316774	0.001038089	0.006001042	Ila09G002380	GWHBIST00000009	2313084	2327294	+	2366	protein_coding	- && sp|Q8SKU2|TIC62_PEA Protein TIC 62, chloroplastic OS=Pisum sativum OX=3888 GN=TIC62 PE=1 SV=2 && PF13460:NAD(P)H-binding	-
Ila12G001660	5176	4900	3807	5444	5346	6769	107.2844475	100.408493	72.73184867	108.7927406	97.55954266	134.1291856	5726.205308	4716.174191	0.279995233	0.140052932	0.28369069	Ila12G001660	GWHBIST00000012	13284159	13311135	-	4491	protein_coding	- && sp|F4HYJ7|DEXH3_ARATH DExH-box ATP-dependent RNA helicase DExH3 OS=Arabidopsis thaliana OX=3702 GN=At1g48650 PE=3 SV=1 && PF00271:Helicase conserved C-terminal domain|PF04408:Helicase associated domain (HA2)|PF00035:Double-stranded RNA binding motif|PF07717:Oligonucleotide/oligosaccharide-binding (OB)-fold|PF00270:DEAD/DEAH box helicase	HA2
Ila0G007040	5416	4827	5514	5759	5204	4716	261.8987816	230.7618377	245.7654519	268.4980899	221.5595174	218.014255	5104.32655	5323.143033	-0.060595571	0.651023822	0.787648806	Ila0G007040	GWHBIST00000184	54210	59855	-	1925	protein_coding	- && sp|Q40143|CYSP3_SOLLC Cysteine proteinase 3 OS=Solanum lycopersicum OX=4081 GN=CYP-3 PE=2 SV=1 && PF08246:Cathepsin propeptide inhibitor domain (I29)|PF00112:Papain family cysteine protease	Peptidase_C1
Ila13G010150	6093	6155	7031	4750	3986	3348	346.6837096	346.2279958	368.7386007	260.5764517	199.6815097	182.1142705	3935.504732	6504.219198	-0.724888011	5.40E-06	6.64E-05	Ila13G010150	GWHBIST00000013	22392029	22399341	+	1636	protein_coding	- && sp|P48534|APX1_PEA L-ascorbate peroxidase, cytosolic OS=Pisum sativum OX=3888 GN=APX1 PE=1 SV=2 && PF00141:Peroxidase	-
Ila12G012520	5453	12331	6954	3504	1707	1285	361.023717	807.1056748	424.3597358	223.6678858	99.50205651	81.33165983	2129.785898	8384.789748	-1.977087473	0.001192826	0.006701609	Ila12G012520	GWHBIST00000012	31012279	31014454	+	1406	protein_coding	- && sp|Q9FZ62|PPSP2_ARATH Inorganic pyrophosphatase 2 OS=Arabidopsis thaliana OX=3702 GN=At1g17710 PE=2 SV=1 && PF06888:Putative Phosphatase	-
Ila16G013770	5495	6899	6222	4961	3516	4002	135.8228807	168.586678	141.7537301	118.2262099	76.51602619	94.56677905	4080.117431	6292.229129	-0.62504234	0.000648164	0.004032459	Ila16G013770	GWHBIST00000016	37417188	37427647	+	3766	protein_coding	- && sp|Q43845|SPSA_SOLTU Probable sucrose-phosphate synthase OS=Solanum tuberosum OX=4113 GN=SPS PE=2 SV=1 && PF00534:Glycosyl transferases group 1|PF00862:Sucrose synthase|PF05116:Sucrose-6F-phosphate phosphohydrolase	Glycos_transf_1
Ila13G003260	5660	5245	4246	4955	4518	6461	649.6525287	595.1714115	449.2043366	548.3371372	456.5719523	708.9583394	5205.092597	5144.840198	0.016799654	0.93406956	0.966273331	Ila13G003260	GWHBIST00000013	3697323	3699187	-	811	protein_coding	- && sp|Q39194|PSBW_ARATH Photosystem II reaction center W protein, chloroplastic OS=Arabidopsis thaliana OX=3702 GN=PSBW PE=1 SV=2 && PF07123:Photosystem II reaction centre W protein (PsbW)	-
Ila01G009120	4395	5276	7339	4224	5833	3851	102.8958976	122.116918	158.3708752	95.34598057	120.2345984	86.19239956	4493.214021	5708.347325	-0.345322301	0.079959669	0.187483551	Ila01G009120	GWHBIST00000001	12456789	12466520	+	3976	protein_coding	- && sp|O48946|CESA1_ARATH Cellulose synthase A catalytic subunit 1 [UDP-forming] OS=Arabidopsis thaliana OX=3702 GN=CESA1 PE=1 SV=1 && PF14569:Zinc-binding RING-finger|PF03552:Cellulose synthase	-
Ila02G009250	5182	6122	6444	4883	4096	4140	212.6864952	248.409213	243.7795585	193.2273197	148.0133043	162.4422961	4277.90026	5986.67528	-0.484950168	0.000870641	0.005159101	Ila02G009250	GWHBIST00000002	19267494	19276922	-	2268	protein_coding	- && sp|P19595|UGPA_SOLTU UTP--glucose-1-phosphate uridylyltransferase OS=Solanum tuberosum OX=4113 PE=1 SV=3 && PF01704:UTP--glucose-1-phosphate uridylyltransferase	-
Ila09G001080	4618	4761	3915	5129	5867	6525	196.3784027	200.1565671	153.4513839	210.2866939	219.6616204	265.2629426	5698.924948	4508.458286	0.338111132	0.034266871	0.09941766	Ila09G001080	GWHBIST00000009	1109009	1116523	-	2189	protein_coding	- && sp|P48496|TPIC_SPIOL Triosephosphate isomerase, chloroplastic OS=Spinacia oleracea OX=3562 GN=TPIP1 PE=1 SV=1 && PF00121:Triosephosphate isomerase	-
Ila09G018180	3672	3763	3079	5312	6717	8137	295.6857497	299.5668881	228.526548	412.4061072	476.2131357	626.3950405	6558.506325	3566.145257	0.87905855	3.80E-06	4.90E-05	Ila09G018180	GWHBIST00000009	36110489	36114804	-	1156	protein_coding	- && sp|O04616|CUT1A_ARATH Protein CURVATURE THYLAKOID 1A, chloroplastic OS=Arabidopsis thaliana OX=3702 GN=CURT1A PE=1 SV=1 && PF14159:CAAD domains of cyanobacterial aminoacyl-tRNA synthetase	-
Ila14G020950	4968	5447	5072	5246	4950	4917	604.5130884	655.2595571	568.8563553	615.4484848	530.307318	571.9796817	4920.940373	5238.626295	-0.090274653	0.456603696	0.631547954	Ila14G020950	GWHBIST00000014	48474694	48483165	+	765	protein_coding	- && sp|P48495|TPIS_PETHY Triosephosphate isomerase, cytosolic OS=Petunia hybrida OX=4102 GN=TPIP1 PE=2 SV=1 && PF00121:Triosephosphate isomerase	-
Ila07G010470	4852	5536	6618	3899	5649	3644	364.5314827	411.189673	458.2898736	282.4273718	373.6664661	261.727219	4258.529929	5725.596359	-0.427011994	0.013448797	0.048145323	Ila07G010470	GWHBIST00000007	25130680	25135362	+	1239	protein_coding	- && sp|Q9SGY2|ACLA1_ARATH ATP-citrate synthase alpha chain protein 1 OS=Arabidopsis thaliana OX=3702 GN=ACLA-1 PE=1 SV=1 && PF16114:ATP citrate lyase citrate-binding|PF08442:ATP-grasp domain	-
Ila12G012100	2802	2526	2438	7529	7370	7533	98.35131419	87.65511226	78.8760196	254.7936693	227.7601943	252.7762556	7302.747002	2630.613705	1.473136394	3.46E-29	2.01E-26	Ila12G012100	GWHBIST00000012	30631655	30638086	-	2652	protein_coding	- && sp|P08927|RUBB_PEA RuBisCO large subunit-binding protein subunit beta, chloroplastic OS=Pisum sativum OX=3888 PE=1 SV=2 && PF00118:TCP-1/cpn60 chaperonin family	-
Ila02G008080	4620	4921	3801	5461	5189	6081	221.5654281	233.3163928	168.0185138	252.5058806	219.0998053	278.7990545	5454.456526	4527.667021	0.268698224	0.110282602	0.237805515	Ila02G008080	GWHBIST00000002	17928944	17938510	+	1941	protein_coding	- && sp|Q94AT5|EXEC2_ARATH Protein EXECUTER 2, chloroplastic OS=Arabidopsis thaliana OX=3702 GN=EX2 PE=2 SV=1 && PF12014:Domain of unknown function (DUF3506)	-
Ila03G009060	4016	4345	3438	5564	6128	6498	281.7139399	301.3257747	222.2899121	376.3059231	378.4702004	435.7632614	5916.230286	4001.980605	0.564037219	0.000245367	0.001746517	Ila03G009060	GWHBIST00000003	21077880	21082942	+	1327	protein_coding	- && sp|Q96291|BAS1A_ARATH 2-Cys peroxiredoxin BAS1, chloroplastic OS=Arabidopsis thaliana OX=3702 GN=BAS1 PE=1 SV=2 && PF10417:C-terminal domain of 1-Cys peroxiredoxin|PF00578:AhpC/TSA family	-
Ila13G005180	5223	5482	4273	5163	4505	5280	250.0974833	259.5136431	188.5912056	238.358542	189.925112	241.7015806	4877.439292	5082.85752	-0.059510458	0.727656252	0.841298462	Ila13G005180	GWHBIST00000013	6389882	6393692	-	1944	protein_coding	- && sp|Q8RXE8|BASS3_ARATH Probable sodium/metabolite cotransporter BASS3, chloroplastic OS=Arabidopsis thaliana OX=3702 GN=BASS3 PE=2 SV=1 && PF01758:Sodium Bile acid symporter family	-
Ila02G010010	4376	5492	7398	4153	4444	3863	58.17558553	72.18149054	90.65192384	53.2310068	52.01586204	49.09581008	4047.049541	5795.12017	-0.518035604	0.003005354	0.01435623	Ila02G010010	GWHBIST00000002	20438952	20455057	+	7002	protein_coding	- && sp|F4IIM1|CSI1_ARATH Protein CELLULOSE SYNTHASE INTERACTIVE 1 OS=Arabidopsis thaliana OX=3702 GN=CSI1 PE=1 SV=1 && PF00168:C2 domain	C2
Ila01G001470	5419	6439	7769	3088	3984	2682	215.1106241	252.6928781	284.2543235	118.1841675	139.2388216	101.7789005	3154.364236	6604.264557	-1.065991297	2.02E-10	7.49E-09	Ila01G001470	GWHBIST00000001	1531955	1534299	+	2345	protein_coding	- && sp|B3RFJ6|86A22_PETHY Cytochrome P450 86A22 OS=Petunia hybrida OX=4102 GN=CYP86A22 PE=1 SV=1 && PF00067:Cytochrome P450	p450
Ila08G009130	5168	6142	4602	5294	3423	4700	129.0769422	151.6588796	105.9429413	127.4821561	75.27163729	112.2225916	4396.102068	5396.846847	-0.29593762	0.171199879	0.327823239	Ila08G009130	GWHBIST00000008	27028146	27038274	+	3727	protein_coding	- && sp|O04933|SPSA2_CRAPL Probable sucrose-phosphate synthase 2 OS=Craterostigma plantagineum OX=4153 GN=SPS2 PE=2 SV=1 && PF00862:Sucrose synthase|PF00534:Glycosyl transferases group 1|PF05116:Sucrose-6F-phosphate phosphohydrolase	Glycos_transf_1
Ila15G022570	5430	5514	4292	4345	4409	5315	289.329343	290.463309	210.790781	223.2141549	206.8383431	270.7398553	4584.718124	5172.148607	-0.173908351	0.322344892	0.50566342	Ila15G022570	GWHBIST00000015	55142031	55146247	+	1747	protein_coding	- && sp|P54260|GCST_SOLTU Aminomethyltransferase, mitochondrial OS=Solanum tuberosum OX=4113 GN=GDCST PE=2 SV=1 && PF08669:Glycine cleavage T-protein C-terminal barrel domain|PF01571:Aminomethyltransferase folate-binding domain	GCV_T
Ila09G017370	4963	5236	4543	5223	5269	4047	104.5929548	109.0911858	88.24703901	106.124946	97.76528164	81.53566802	4721.186451	4994.197849	-0.081043699	0.593699335	0.744448281	Ila09G017370	GWHBIST00000009	35456297	35467806	-	4417	protein_coding	- && sp|O65272|KEA2_ARATH K(+) efflux antiporter 2, chloroplastic OS=Arabidopsis thaliana OX=3702 GN=KEA2 PE=1 SV=2 && PF02254:TrkA-N domain|PF00999:Sodium/hydrogen exchanger family	Na_H_Exchanger
Ila11G002350	4667	4210	3996	5359	5614	5175	99.84682831	89.04518414	78.79908978	110.5400176	105.7467872	105.8432336	5248.687159	4361.67598	0.26715098	0.038233727	0.10780334	Ila11G002350	GWHBIST00000011	12797189	12841396	+	4351	protein_coding	- && sp|Q6ZY51|PWD_ARATH Phosphoglucan, water dikinase, chloroplastic OS=Arabidopsis thaliana OX=3702 GN=GWD3 PE=1 SV=1 && PF00686:Starch binding domain|PF01326:Pyruvate phosphate dikinase, PEP/pyruvate binding domain	-
Ila13G006940	4948	5117	3830	4789	4847	5397	285.5491553	291.9432735	203.7272914	266.4620258	246.2762368	297.7555596	4895.696161	4718.869263	0.053119354	0.757170354	0.859980847	Ila13G006940	GWHBIST00000013	12101121	12113159	+	1613	protein_coding	- && sp|Q94BS2|MET1_ARATH Protein MET1, chloroplastic OS=Arabidopsis thaliana OX=3702 GN=MET1 PE=1 SV=1 && -	-
Ila20G000960	4371	3910	4473	6601	4983	4429	74.68429123	66.04760627	70.44442101	108.7420434	74.96139236	72.34531467	5223.843288	4308.367029	0.277926326	0.122738185	0.25785361	Ila20G000960	GWHBIST00000020	882882	899802	+	5448	protein_coding	- && sp|F4JC97|PSME4_ARATH Proteasome activator subunit 4 OS=Arabidopsis thaliana OX=3702 GN=PA200 PE=2 SV=2 && PF16507:Proteasome-substrate-size regulator, mid region|PF11919:Domain of unknown function (DUF3437)	-
Ila20G008350	5403	4789	6273	4680	4218	3353	258.5835647	226.5909995	276.7199602	215.9489532	177.7341273	153.4107441	3984.848353	5549.384776	-0.477853044	0.003388589	0.015885809	Ila20G008350	GWHBIST00000020	9671312	9686420	+	1945	protein_coding	- && sp|O04057|ASPR_CUCPE Aspartic proteinase OS=Cucurbita pepo OX=3663 PE=2 SV=1 && PF00026:Eukaryotic aspartyl protease|PF05184:Saposin-like type B, region 1|PF03489:Saposin-like type B, region 2	Asp
Ila18G007150	4792	5285	3946	3906	5163	5528	171.8956963	187.4239357	130.4681558	135.0889209	163.0604435	189.5712618	4739.569164	4759.657416	-0.006035583	0.974090632	0.986169475	Ila18G007150	GWHBIST00000018	10611657	10630415	+	2595	protein_coding	- && sp|F4JCX9|LNK2_ARATH Protein LNK2 OS=Arabidopsis thaliana OX=3702 GN=LNK2 PE=1 SV=1 && -	-
Ila17G019600	3911	3822	2551	5525	5677	7063	141.9892128	137.1797748	85.36448851	193.3922727	181.4615975	245.1393408	5952.992497	3500.143243	0.766272879	0.000357633	0.002409041	Ila17G019600	GWHBIST00000017	41826176	41841641	+	2564	protein_coding	- && sp|Q9MB58|F26_ARATH 6-phosphofructo-2-kinase/fructose-2,6-bisphosphatase OS=Arabidopsis thaliana OX=3702 GN=FKFBP PE=1 SV=1 && PF00300:Histidine phosphatase superfamily (branch 1)|PF01591:6-phosphofructo-2-kinase|PF00686:Starch binding domain	-
Ila16G023720	5069	4541	5271	5296	4418	3856	289.4811192	256.3783341	277.4535056	291.5984612	222.1375428	210.5189763	4420.887618	5025.542337	-0.184992925	0.24127054	0.416183604	Ila16G023720	GWHBIST00000016	51508383	51513654	+	1630	protein_coding	- && sp|Q40143|CYSP3_SOLLC Cysteine proteinase 3 OS=Solanum lycopersicum OX=4081 GN=CYP-3 PE=2 SV=1 && PF00112:Papain family cysteine protease|PF08246:Cathepsin propeptide inhibitor domain (I29)	Peptidase_C1
Ila02G001720	4726	4623	3291	4829	5220	5690	287.9094496	278.4312409	184.794624	283.6342724	279.9825761	331.3833933	5121.260734	4298.054473	0.252886307	0.180413597	0.340489181	Ila02G001720	GWHBIST00000002	8820985	8826052	+	1528	protein_coding	- && sp|Q9FZ47|ACR11_ARATH ACT domain-containing protein ACR11 OS=Arabidopsis thaliana OX=3702 GN=ACR11 PE=1 SV=1 && -	-
Ila18G010450	5008	4638	3441	4862	4808	5606	143.3505421	131.249492	90.78601227	134.180459	121.1707451	153.4067203	4977.910712	4449.721964	0.161874767	0.398236417	0.579677647	Ila18G010450	GWHBIST00000018	26956108	26996360	+	3252	protein_coding	- && sp|Q8VZ10|SOQ1_ARATH Protein SUPPRESSOR OF QUENCHING 1, chloroplastic OS=Arabidopsis thaliana OX=3702 GN=SOQ1 PE=1 SV=1 && PF01436:NHL repeat|PF13905:Thioredoxin-like|PF13419:Haloacid dehalogenase-like hydrolase	NHL
Ila16G008500	4837	4895	5455	4380	4767	3985	95.61652437	95.66243462	99.39187171	83.47766176	82.96603166	75.30806068	4263.131261	5125.786613	-0.265854504	0.011816593	0.043636141	Ila16G008500	GWHBIST00000016	15893414	15906895	-	4709	protein_coding	- && sp|Q9C9U5|SIS8_ARATH Probable serine/threonine-protein kinase SIS8 OS=Arabidopsis thaliana OX=3702 GN=SIS8 PE=1 SV=1 && PF00564:PB1 domain|PF07714:Protein tyrosine kinase	Pkinase_Tyr
Ila15G001580	5086	4857	4857	4754	4762	3963	34.97869898	33.02381686	30.78893367	31.5228716	28.83467013	26.05599372	4379.962722	5007.350572	-0.193091602	0.126385184	0.263438805	Ila15G001580	GWHBIST00000015	1904109	1982829	+	13535	protein_coding	- && sp|Q555C6|VP13B_DICDI Putative vacuolar protein sorting-associated protein 13B OS=Dictyostelium discoideum OX=44689 GN=vps13B PE=3 SV=1 && PF16908:Vacuolar sorting-associated protein 13, N-terminal|PF00169:PH domain|PF06101:Vacuolar protein sorting-associated protein 62|PF06398:Integral peroxisomal membrane peroxin|PF06650:SHR-binding domain of vacuolar-sorting associated protein 13|PF12624:…	PH
Ila12G010200	3851	3945	3142	5108	6402	5777	63.24544218	64.05227946	47.56211337	80.8808865	92.56987657	90.70147602	5606.792946	3711.507019	0.595298137	0.000120128	0.00094968	Ila12G010200	GWHBIST00000012	29108441	29122372	-	5668	protein_coding	- && sp|F4JKH6|TSS_ARATH Protein TSS OS=Arabidopsis thaliana OX=3702 GN=TSS PE=1 SV=1 && PF15044:Mitochondrial function, CLU-N-term|PF13424:Tetratricopeptide repeat|PF12807:Translation initiation factor eIF3 subunit 135	-
Ila15G010010	4380	5379	6629	4165	3696	3950	251.6776512	305.5652432	351.089474	230.7410406	186.9824321	216.9821008	3850.505135	5510.489579	-0.517258535	0.001466017	0.007947752	Ila15G010010	GWHBIST00000015	14013665	14017753	+	1620	protein_coding	- && sp|Q8S9J6|ASPA_ARATH Aspartyl protease family protein At5g10770 OS=Arabidopsis thaliana OX=3702 GN=At5g10770 PE=2 SV=1 && PF14543:Xylanase inhibitor N-terminal|PF14541:Xylanase inhibitor C-terminal	-
Ila09G008880	5433	6329	7890	2726	3012	2807	264.0927525	304.1471429	353.5029396	127.7561833	128.9050838	130.4414035	2776.037485	6610.113688	-1.251710928	5.12E-19	8.55E-17	Ila09G008880	GWHBIST00000009	17008498	17012780	-	1915	protein_coding	- && sp|Q307Y9|METK1_SOLTU S-adenosylmethionine synthase 1 OS=Solanum tuberosum OX=4113 GN=METK1 PE=2 SV=1 && PF02772:S-adenosylmethionine synthetase, central domain|PF00438:S-adenosylmethionine synthetase, N-terminal domain|PF02773:S-adenosylmethionine synthetase, C-terminal domain	-
Ila19G007310	6063	5932	5496	4250	3171	3239	167.1252477	161.6543909	139.6369866	112.9490871	76.95716098	85.35357498	3481.001956	5923.709353	-0.767061369	9.19E-06	0.000105713	Ila19G007310	GWHBIST00000019	21844879	21883420	-	3377	protein_coding	- && sp|Q41058|GLGB1_PEA 1,4-alpha-glucan-branching enzyme 1, chloroplastic/amyloplastic OS=Pisum sativum OX=3888 GN=SBEI PE=1 SV=1 && PF02922:Carbohydrate-binding module 48 (Isoamylase N-terminal domain)|PF00128:Alpha amylase, catalytic domain|PF02806:Alpha amylase, C-terminal all-beta domain	-
Ila06G009990	5783	5361	5712	4100	3823	3121	280.9591911	257.4943632	255.7864289	192.0495119	163.5281975	144.9573004	3591.371605	5698.724099	-0.666112325	2.66E-06	3.57E-05	Ila06G009990	GWHBIST00000006	10978070	10992746	+	1916	protein_coding	- && sp|Q07346|DCE_PETHY Glutamate decarboxylase OS=Petunia hybrida OX=4102 GN=GAD PE=1 SV=1 && PF00282:Pyridoxal-dependent decarboxylase conserved domain	-
Ila03G000960	4379	4540	5006	4685	5192	4081	103.3793327	105.9611101	108.9303434	106.6369399	107.917472	92.10466903	4528.068488	4699.524676	-0.05359817	0.646282037	0.784041093	Ila03G000960	GWHBIST00000003	1159533	1166092	+	3943	protein_coding	- && sp|P93028|UBE11_ARATH Ubiquitin-activating enzyme E1 1 OS=Arabidopsis thaliana OX=3702 GN=UBA1 PE=1 SV=1 && PF10585:Ubiquitin-activating enzyme active site|PF16191:Ubiquitin-activating enzyme E1 four-helix bundle|PF00899:ThiF family|PF16190:Ubiquitin-activating enzyme E1 FCCH domain|PF09358:Ubiquitin fold domain	-
Ila17G012580	4778	4491	4775	5048	4870	3821	205.6246529	191.0750401	189.4094579	209.4535292	184.5254607	157.2035492	4464.597902	4747.504683	-0.088626286	0.531668989	0.696171722	Ila17G012580	GWHBIST00000017	29656074	29668822	-	2163	protein_coding	- && sp|Q9FMP3|DPYS_ARATH Dihydropyrimidinase OS=Arabidopsis thaliana OX=3702 GN=PYD2 PE=1 SV=1 && PF01979:Amidohydrolase family	Amidohydro_1
Ila05G006740	6311	6933	6330	1534	3827	2793	197.9337441	214.9684512	182.9888459	46.38593539	105.6765002	83.74306801	2620.886502	6623.097266	-1.337323773	1.71E-07	3.21E-06	Ila05G006740	GWHBIST00000005	21291377	21298855	+	2968	protein_coding	- && sp|P36859|NIA_PETHY Nitrate reductase [NADH] OS=Petunia hybrida OX=4102 GN=NIA PE=2 SV=1 && PF00174:Oxidoreductase molybdopterin binding domain|PF00173:Cytochrome b5-like Heme/Steroid binding domain|PF00970:Oxidoreductase FAD-binding domain|PF03404:Mo-co oxidoreductase dimerisation domain|PF00175:Oxidoreductase NAD-binding domain	FAD_binding_6
Ila05G003340	3905	3515	2914	6020	4821	6400	386.293118	343.75825	265.6958241	574.1584008	419.885971	605.2463501	5635.694223	3508.884671	0.683605714	0.000434654	0.002855859	Ila05G003340	GWHBIST00000005	15582706	15583646	-	941	protein_coding	- && sp|P80470|PSBY_SPIOL Photosystem II core complex proteins psbY, chloroplastic OS=Spinacia oleracea OX=3562 GN=PSBY PE=1 SV=2 && PF06298:Photosystem II protein Y (PsbY)	-
Ila0G009640	4246	4157	5993	3956	4482	4681	362.9423662	351.2930587	472.1730578	326.0267681	337.3089222	382.5186285	4265.102318	4838.296768	-0.18201335	0.246176738	0.422071873	Ila0G009640	GWHBIST00000030	168974	171284	+	1089	protein_coding	- && sp|Q08298|RD22_ARATH BURP domain protein RD22 OS=Arabidopsis thaliana OX=3702 GN=RD22 PE=2 SV=1 && PF03181:BURP domain	-
Ila12G000280	4834	4262	3954	4240	5491	4731	237.4559127	206.9767937	179.0244117	200.8082253	237.4794781	222.1700754	4686.888849	4424.316449	0.083299851	0.573159545	0.728929924	Ila12G000280	GWHBIST00000012	2331387	2334758	+	1895	protein_coding	- && sp|Q9LVJ0|UVB31_ARATH UV-B-induced protein At3g17800, chloroplastic OS=Arabidopsis thaliana OX=3702 GN=At3g17800 PE=2 SV=1 && PF05542:Protein of unknown function (DUF760)	-
Ila17G001550	5007	5319	4760	4300	4607	3514	344.4810617	361.7842177	301.8519326	285.2302054	279.0642937	231.124396	4030.17663	5107.862604	-0.341798191	0.014976786	0.052393896	Ila17G001550	GWHBIST00000017	1716100	1718036	-	1353	protein_coding	- && sp|Q8RWE8|GGAP1_ARATH GDP-L-galactose phosphorylase 1 OS=Arabidopsis thaliana OX=3702 GN=VTC2 PE=1 SV=1 && -	-
Ila01G004930	4620	4453	3789	4964	4464	5189	227.0636199	216.366562	171.6443195	235.2213043	193.1648351	243.8066374	4767.64814	4362.526501	0.128127373	0.424043375	0.604097673	Ila01G004930	GWHBIST00000001	5491863	5497836	-	1894	protein_coding	- && - && PF02517:CPBP intramembrane metalloprotease	-
Ila0G007110	4609	3953	3276	5618	4076	5915	286.9796302	243.3341402	188.012838	337.2604366	223.448189	352.0913737	5110.309507	4021.550503	0.345658934	0.110583257	0.238168798	Ila0G007110	GWHBIST00000161	99142	100909	-	1495	protein_coding	- && sp|P27524|CB4A_SOLLC Chlorophyll a-b binding protein CP24 10A, chloroplastic OS=Solanum lycopersicum OX=4081 GN=CAP10A PE=3 SV=1 && PF00504:Chlorophyll A-B binding protein	-
Ila09G003120	3570	3552	3476	4948	5848	6046	128.1596331	126.0630656	115.0170053	171.2584582	184.8369117	207.4949134	5472.633871	3585.430358	0.610144238	1.26E-06	1.85E-05	Ila09G003120	GWHBIST00000009	3189730	3197927	-	2593	protein_coding	- && sp|Q9FXA2|PABP8_ARATH Polyadenylate-binding protein 8 OS=Arabidopsis thaliana OX=3702 GN=PAB8 PE=1 SV=1 && PF00658:Poly-adenylate binding protein, unique domain|PF00076:RNA recognition motif. (a.k.a. RRM, RBD, or RNP domain)	RRM_1
Ila11G008630	4438	5107	3835	4380	4589	5082	193.4067405	220.0300682	154.0454675	184.0338526	176.0762036	211.726511	4574.077855	4539.248207	0.011068226	0.946515124	0.972744188	Ila11G008630	GWHBIST00000011	26110694	26116590	+	2136	protein_coding	- && sp|P55229|GLGL1_ARATH Glucose-1-phosphate adenylyltransferase large subunit 1, chloroplastic OS=Arabidopsis thaliana OX=3702 GN=ADG2 PE=1 SV=3 && PF00483:Nucleotidyl transferase	-
Ila05G014950	5702	4821	6585	4260	3268	2745	296.1929818	247.5805652	315.2844696	213.3518679	149.4610053	136.3157923	3349.507065	5764.888084	-0.783419615	5.42E-05	0.000482624	Ila05G014950	GWHBIST00000005	31684440	31688808	+	1792	protein_coding	- && sp|P25804|CYSP_PEA Cysteine proteinase 15A OS=Pisum sativum OX=3888 PE=2 SV=1 && PF08246:Cathepsin propeptide inhibitor domain (I29)|PF00112:Papain family cysteine protease	Peptidase_C1
Ila16G004090	4270	5037	5079	4250	3998	4700	229.3585152	267.4796905	251.4574197	220.0975575	189.0723767	241.346566	4221.698944	4856.262448	-0.202116908	0.147110872	0.293374025	Ila16G004090	GWHBIST00000016	4702059	4704929	-	1733	protein_coding	- && sp|G3FIN9|UGTK5_MANES Linamarin synthase 2 OS=Manihot esculenta OX=3983 GN=UGT85K5 PE=1 SV=1 && PF00201:UDP-glucoronosyl and UDP-glucosyl transferase	UDPGT
Ila14G007760	4987	5050	4085	5356	3494	4264	341.5902512	341.9710526	257.9036026	353.7088835	210.7110447	279.2155285	4293.432715	4791.306717	-0.158323297	0.446915667	0.623241329	Ila14G007760	GWHBIST00000014	11235911	11245142	+	1359	protein_coding	- && sp|Q50228|FMDA_METME Formamidase OS=Methylophilus methylotrophus OX=17 GN=fmdA PE=1 SV=1 && PF03069:Acetamidase/Formamidase family	FmdA_AmdA
Ila09G013150	3797	3660	2900	4535	5503	6695	233.7622411	222.7648774	164.5625511	269.1846902	298.2851124	394.0402798	5444.224356	3516.70936	0.630565743	0.001250468	0.006956607	Ila09G013150	GWHBIST00000009	29717833	29727367	+	1512	protein_coding	- && sp|Q9LY66|RK1_ARATH 50S ribosomal protein L1, chloroplastic OS=Arabidopsis thaliana OX=3702 GN=RPL1 PE=1 SV=1 && PF00687:Ribosomal protein L1p/L10e family	-
Ila06G003000	3479	5535	8989	2405	3465	3182	146.4708637	230.3808129	348.8248712	97.62278517	128.439425	128.0717257	2932.153277	6008.44667	-1.035059471	0.000144986	0.001115392	Ila06G003000	GWHBIST00000006	2927355	2930706	-	2211	protein_coding	- && sp|Q9LF33|UGDH3_ARATH UDP-glucose 6-dehydrogenase 3 OS=Arabidopsis thaliana OX=3702 GN=UGD3 PE=1 SV=1 && PF03721:UDP-glucose/GDP-mannose dehydrogenase family, NAD binding domain|PF00984:UDP-glucose/GDP-mannose dehydrogenase family, central domain|PF03720:UDP-glucose/GDP-mannose dehydrogenase family, UDP binding domain	-
Ila14G022580	4381	5233	5609	3562	4681	3521	79.44883717	93.82031663	93.75598058	62.27984264	74.73967986	61.04310123	3807.186681	5132.793436	-0.430955301	0.002162636	0.010972658	Ila14G022580	GWHBIST00000014	51048091	51062026	+	5133	protein_coding	- && sp|Q0WNJ6|CLAH1_ARATH Clathrin heavy chain 1 OS=Arabidopsis thaliana OX=3702 GN=CHC1 PE=1 SV=1 && PF13838:Clathrin-H-link|PF09268:Clathrin, heavy-chain linker|PF00637:Region in Clathrin and VPS|PF01394:Clathrin propeller repeat	-
Ila12G011190	5650	6003	6138	2867	2951	3351	286.1465387	300.5662827	286.527415	139.9932325	131.5853557	162.2447862	2985.993345	6010.486499	-1.009361511	7.55E-16	7.58E-14	Ila12G011190	GWHBIST00000012	29904917	29906754	+	1838	protein_coding	- && sp|Q0WP36|MOT2_ARATH Molybdate transporter 2 OS=Arabidopsis thaliana OX=3702 GN=MOT2 PE=1 SV=2 && PF16983:Molybdate transporter of MFS superfamily	-
Ila15G012840	3515	3138	2640	5419	6091	5959	186.544005	164.6420534	129.1395125	277.2773647	284.6052237	302.3330497	5676.518924	3154.973218	0.847504693	9.90E-08	1.95E-06	Ila15G012840	GWHBIST00000015	29444821	29473649	+	1754	protein_coding	- && sp|P35055|HEM6_SOYBN Oxygen-dependent coproporphyrinogen-III oxidase, chloroplastic OS=Glycine max OX=3847 GN=CPX PE=2 SV=1 && PF01218:Coproporphyrinogen III oxidase	-
Ila12G009400	3394	4067	4705	4704	6653	3167	148.18703	175.5514399	189.3464783	198.0181362	255.7491385	132.1912446	4678.261066	4096.442423	0.191638794	0.4010122	0.582348251	Ila12G009400	GWHBIST00000012	28504813	28509085	+	2132	protein_coding	- && sp|Q39817|CALX_SOYBN Calnexin homolog OS=Glycine max OX=3847 PE=2 SV=1 && PF00262:Calreticulin family	-
Ila09G003940	4117	3971	3364	4527	4978	5700	242.7081127	231.4382735	182.7926217	257.3079592	258.3786464	321.2436518	4948.821386	3884.521778	0.349404934	0.031375608	0.093043383	Ila09G003940	GWHBIST00000009	4160689	4166955	+	1579	protein_coding	- && sp|Q9XJ35|CLPR1_ARATH ATP-dependent Clp protease proteolytic subunit-related protein 1, chloroplastic OS=Arabidopsis thaliana OX=3702 GN=CLPR1 PE=1 SV=1 && PF00574:Clp protease	-
Ila17G002160	6024	5776	4898	4318	2532	3075	287.2702856	272.3107555	215.2899576	198.530703	106.3084398	140.1868042	3253.085865	5664.213312	-0.800137591	0.000427425	0.002813141	Ila17G002160	GWHBIST00000017	2311047	2314335	-	1952	protein_coding	- && sp|O23787|THI4_CITSI Thiamine thiazole synthase, chloroplastic OS=Citrus sinensis OX=2711 GN=THI1 PE=2 SV=1 && PF01946:Thi4 family	-
Ila07G007020	4811	4628	3670	4508	4095	4858	218.2446251	207.555104	153.452339	197.1657189	163.5537123	210.6793562	4390.834331	4451.181771	-0.019672686	0.910835702	0.952563511	Ila07G007020	GWHBIST00000007	21170016	21174776	+	2052	protein_coding	- && sp|Q9S713|STT7_ARATH Serine/threonine-protein kinase STN7, chloroplastic OS=Arabidopsis thaliana OX=3702 GN=STN7 PE=1 SV=1 && PF00069:Protein kinase domain	Pkinase
Ila15G000460	4953	4937	3605	3861	3983	5158	240.258582	236.7584981	161.1814651	180.5716983	170.105826	239.192849	4238.985578	4586.286328	-0.11357998	0.573260173	0.728977933	Ila15G000460	GWHBIST00000015	534078	538045	-	1919	protein_coding	- && sp|P27774|KPPR_MESCR Phosphoribulokinase, chloroplastic OS=Mesembryanthemum crystallinum OX=3544 PE=2 SV=1 && PF00485:Phosphoribulokinase / Uridine kinase family	-
Ila19G013300	5869	5709	6278	3396	2743	2430	600.3551955	577.3458847	591.9223298	334.9277601	247.0405649	237.6329776	2793.02236	6030.490359	-1.110536938	3.55E-12	1.90E-10	Ila19G013300	GWHBIST00000019	31064832	31068527	-	910	protein_coding	- && sp|Q8H0X6|CYT6_ARATH Cysteine proteinase inhibitor 6 OS=Arabidopsis thaliana OX=3702 GN=CYS6 PE=1 SV=2 && PF16845:Aspartic acid proteinase inhibitor	-
Ila15G022510	6409	6383	5296	2877	1595	3841	324.7630949	319.7666094	247.3566695	140.5579975	71.15990957	186.0702664	2736.474489	6135.487356	-1.164951562	5.47E-05	0.000485898	Ila15G022510	GWHBIST00000015	55101760	55105500	+	1837	protein_coding	- && sp|P92979|APR1_ARATH 5'-adenylylsulfate reductase 1, chloroplastic OS=Arabidopsis thaliana OX=3702 GN=APR1 PE=1 SV=2 && PF00085:Thioredoxin|PF01507:Phosphoadenosine phosphosulfate reductase family	-
Ila16G020770	4159	4765	6110	3425	4311	3597	164.5328231	186.3624459	222.7943062	130.6361896	150.1550532	136.0380316	3672.911972	5055.094348	-0.460835934	0.002148141	0.010910378	Ila16G020770	GWHBIST00000016	47459151	47463824	+	2353	protein_coding	- && sp|F4KIB2|TMN8_ARATH Transmembrane 9 superfamily member 8 OS=Arabidopsis thaliana OX=3702 GN=TMN8 PE=2 SV=1 && PF02990:Endomembrane protein 70	-
Ila02G000680	2686	2675	2335	5803	6188	6649	132.360868	130.3194542	106.0570961	275.7055245	268.4739815	313.2320578	6065.291453	2608.432177	1.217503502	5.12E-18	7.57E-16	Ila02G000680	GWHBIST00000002	6751142	6755415	+	1889	protein_coding	- && sp|P31593|GSA_TOBAC Glutamate-1-semialdehyde 2,1-aminomutase, chloroplastic OS=Nicotiana tabacum OX=4097 GN=GSA PE=2 SV=1 && PF00202:Aminotransferase class-III	Aminotran_3
Ila11G009190	3169	3076	5284	5292	5099	4414	269.8905221	258.9903562	414.7892111	434.5347663	382.3390938	359.3800754	4814.504886	3862.51992	0.317731109	0.11182031	0.240294489	Ila11G009190	GWHBIST00000011	26647006	26651647	-	1093	protein_coding	- && sp|Q07796|SODC_IPOBA Superoxide dismutase [Cu-Zn] OS=Ipomoea batatas OX=4120 GN=SODCC PE=2 SV=2 && PF00080:Copper/zinc superoxide dismutase (SODC)	-
Ila18G003550	4440	4350	4365	4511	4404	4104	53.56440775	51.8817315	48.53743632	52.46932339	46.77770899	47.33222951	4235.406802	4449.354397	-0.071094073	0.529109728	0.693875814	Ila18G003550	GWHBIST00000018	4285647	4308553	-	7716	protein_coding	- && sp|A1A5H6|CNOT1_DANRE CCR4-NOT transcription complex subunit 1 OS=Danio rerio OX=7955 GN=cnot1 PE=2 SV=1 && PF16418:CCR4-NOT transcription complex subunit 1 HEAT repeat|PF16415:CCR4-NOT transcription complex subunit 1 CAF1-binding domain|PF04054:CCR4-Not complex component, Not1|PF16417:CCR4-NOT transcription complex subunit 1 TTP binding domain|PF12842:Domain of unknown function (DUF3819)	Not1
Ila20G007860	4563	4743	7016	3297	3930	2534	286.0286731	293.9301219	405.3665711	199.258726	216.8952061	151.8525137	3158.712493	5479.444057	-0.794689274	4.11E-05	0.000382738	Ila20G007860	GWHBIST00000020	8910334	8913676	+	1485	protein_coding	- && sp|Q9SJB4|GDL34_ARATH GDSL esterase/lipase At2g04570 OS=Arabidopsis thaliana OX=3702 GN=At2g04570 PE=2 SV=1 && PF00657:GDSL-like Lipase/Acylhydrolase	Lipase_GDSL
Ila02G002610	4924	4846	4682	3781	4469	3287	105.7583566	102.899183	92.68881013	78.29655001	84.50945561	67.49205095	3737.744063	4890.859899	-0.387797797	0.003911833	0.017911466	Ila02G002610	GWHBIST00000002	10206804	10218010	+	4334	protein_coding	- && sp|Q94AI7|TPL_ARATH Protein TOPLESS OS=Arabidopsis thaliana OX=3702 GN=TPL PE=1 SV=1 && -	-
Ila14G020890	3464	4197	4493	4317	4306	5191	207.4972881	248.545199	248.0676936	249.3192949	227.0946314	297.2636753	4502.372454	4097.528836	0.135833595	0.369055868	0.551621118	Ila14G020890	GWHBIST00000014	48410267	48413474	+	1554	protein_coding	- && sp|P30171|ACT11_SOLTU Actin-97 OS=Solanum tuberosum OX=4113 GN=AC97 PE=3 SV=1 && PF00022:Actin	Actin
Ila14G013930	3871	3785	2916	4751	5016	5623	225.3514017	217.8386033	156.467398	266.6621783	257.0945797	312.9402667	5010.107779	3590.724159	0.480643541	0.00570776	0.024292555	Ila14G013930	GWHBIST00000014	31635928	31651035	+	1599	protein_coding	- && sp|Q9FN48|CAS_ARATH Calcium sensing receptor, chloroplastic OS=Arabidopsis thaliana OX=3702 GN=CAS PE=1 SV=1 && -	-
Ila18G011050	4798	5709	8433	2177	2395	2338	274.1730198	322.5198005	444.1665211	119.9394907	120.4947958	127.7218649	2245.864374	6349.558209	-1.499463452	8.18E-16	8.14E-14	Ila18G011050	GWHBIST00000018	28735088	28739670	+	1629	protein_coding	- && sp|A7Q0V4|METK5_VITVI S-adenosylmethionine synthase 5 OS=Vitis vinifera OX=29760 GN=METK5 PE=3 SV=1 && PF00438:S-adenosylmethionine synthetase, N-terminal domain|PF02773:S-adenosylmethionine synthetase, C-terminal domain|PF02772:S-adenosylmethionine synthetase, central domain	-
Ila03G012290	5242	6902	6116	2953	2272	2303	299.360826	389.6770011	321.9323924	162.592571	114.2364186	125.732677	2457.255988	6171.011381	-1.328570032	5.43E-14	4.11E-12	Ila03G012290	GWHBIST00000003	26343630	26345517	-	1630	protein_coding	- && sp|P56725|ZOX_PHAVU Zeatin O-xylosyltransferase OS=Phaseolus vulgaris OX=3885 GN=ZOX1 PE=2 SV=1 && PF00201:UDP-glucoronosyl and UDP-glucosyl transferase	UDPGT
Ila02G003700	4061	4170	4625	4255	4626	4050	151.694735	153.9945818	159.2386561	153.2414957	152.1393116	144.6268122	4199.506769	4338.74469	-0.047076543	0.63615816	0.776310868	Ila02G003700	GWHBIST00000002	11955765	11963864	-	2492	protein_coding	- && sp|P09469|VATA_DAUCA V-type proton ATPase catalytic subunit A OS=Daucus carota OX=4039 PE=2 SV=1 && PF02874:ATP synthase alpha/beta family, beta-barrel domain|PF16886:ATPsynthase alpha/beta subunit N-term extension|PF00006:ATP synthase alpha/beta family, nucleotide-binding domain	ATP-synt_ab
Ila08G012510	3408	3677	3722	4716	5660	4549	126.3896237	134.8147256	127.2293921	168.6261524	184.8104677	161.2813106	4838.083944	3651.077484	0.406195711	0.000292721	0.002030916	Ila08G012510	GWHBIST00000008	32599931	32605739	-	2510	protein_coding	- && sp|Q9LUV4|FRL4A_ARATH FRIGIDA-like protein 4a OS=Arabidopsis thaliana OX=3702 GN=FRL4A PE=2 SV=1 && PF07899:Frigida-like protein	-
Ila0G008610	2567	2695	3256	4753	5590	6853	215.4665603	223.6375095	251.9055029	384.6459144	413.1084878	549.9092364	5596.847031	2869.762725	0.963600578	9.21E-09	2.33E-07	Ila0G008610	GWHBIST00000309	165052	168709	+	1109	protein_coding	- && sp|O04997|SODCP_SOLCS Superoxide dismutase [Cu-Zn], chloroplastic OS=Solidago canadensis var. scabra OX=59294 GN=SODCP PE=2 SV=1 && PF00080:Copper/zinc superoxide dismutase (SODC)	-
Ila16G015760	3924	3819	4535	5147	4284	3930	345.9000595	332.8152086	368.4666432	437.4365884	332.4829662	331.1848492	4354.344622	4141.106791	0.072349197	0.630736261	0.771761566	Ila16G015760	GWHBIST00000016	40929591	40931472	-	1056	protein_coding	- && sp|Q9XEX2|PRX2B_ARATH Peroxiredoxin-2B OS=Arabidopsis thaliana OX=3702 GN=PRXIIB PE=1 SV=1 && PF08534:Redoxin	-
novel.1020	3333	3285	2823	5114	5284	5745	43.56311239	42.44737405	34.00898836	64.44416636	60.8057565	71.78436984	5255.017527	3200.988189	0.715256943	8.91E-07	1.37E-05	-	GWHBIST00000018	15578297	15673811	-	7122	-	- && P93025.2 RecName: Full=Phototropin-2; AltName: Full=Defective in chloroplast avoidance protein 1; AltName: Full=Non-phototropic hypocotyl 1-like protein 1; Short=AtKin7; Short=NPH1-like protein 1 && PF00069:Protein kinase domain	Pkinase
Ila04G010740	5164	6074	8419	2012	1609	2076	340.4372652	395.874488	511.5765367	127.8845664	93.3910383	130.838176	1861.864621	6598.432622	-1.82557717	2.50E-20	5.04E-18	Ila04G010740	GWHBIST00000004	22858803	22863736	-	1412	protein_coding	- && sp|Q8W013|COMT1_CATRO Caffeic acid 3-O-methyltransferase OS=Catharanthus roseus OX=4058 GN=COMT1 PE=2 SV=1 && PF00891:O-methyltransferase domain|PF08100:Dimerisation domain	-
Ila0G007850	4392	6000	4883	4167	2841	3069	143.7534564	194.1507543	147.3132927	131.4978839	81.87013341	96.03048559	3295.172696	5167.689739	-0.64923984	0.001572057	0.008426093	Ila0G007850	GWHBIST00000335	79045	84608	-	2844	protein_coding	- && sp|Q5IH14|SPP1_TOBAC Sucrose-phosphatase 1 OS=Nicotiana tabacum OX=4097 GN=SPP1 PE=2 SV=1 && PF05116:Sucrose-6F-phosphate phosphohydrolase|PF08472:Sucrose-6-phosphate phosphohydrolase C-terminal	-
Ila17G003020	5128	4965	3666	3679	3497	4399	286.8667748	274.5891386	189.0270442	198.4272537	172.2368867	235.2569534	3775.719945	4676.538745	-0.308672252	0.114307109	0.244280086	Ila17G003020	GWHBIST00000017	3650440	3655103	+	1664	protein_coding	- && - && PF04117:Mpv17 / PMP22 family	Mpv17_PMP22
Ila07G004470	3358	3905	4011	2633	7904	3455	177.7053114	204.3020021	195.6462946	134.3414017	368.2688185	174.7930018	4462.142935	3805.079283	0.22989089	0.452688381	0.628193518	Ila07G004470	GWHBIST00000007	17367098	17371669	+	1759	protein_coding	- && sp|Q9LVI4|TIF6B_ARATH Protein TIFY 6B OS=Arabidopsis thaliana OX=3702 GN=TIFY6B PE=1 SV=1 && PF06200:tify domain|PF09425:Divergent CCT motif	Zim
Ila16G021970	3739	4845	4327	4195	4236	3857	121.9942186	156.2821703	130.1277523	131.9638718	121.6852773	120.3066672	3995.32805	4363.372489	-0.127135826	0.354044736	0.537486695	Ila16G021970	GWHBIST00000016	48962279	48968711	-	2853	protein_coding	- && sp|Q05001|NCPR_CATRO NADPH--cytochrome P450 reductase OS=Catharanthus roseus OX=4058 GN=CPR PE=2 SV=1 && PF00667:FAD binding domain|PF00258:Flavodoxin|PF00175:Oxidoreductase NAD-binding domain	NAD_binding_1
Ila01G010670	4165	4065	4092	4502	4022	4314	206.3354179	199.0908009	186.8502355	215.0322337	175.4280931	204.3126182	4185.124342	4167.557766	0.006013981	0.962377251	0.98092598	Ila01G010670	GWHBIST00000001	16619463	16626087	+	1879	protein_coding	- && sp|P93338|GAPN_NICPL NADP-dependent glyceraldehyde-3-phosphate dehydrogenase OS=Nicotiana plumbaginifolia OX=4092 GN=GAPN PE=2 SV=1 && PF00171:Aldehyde dehydrogenase family	Aldedh
Ila03G006260	2325	2134	2960	6390	5551	5654	89.50601399	81.21860809	105.0316575	237.1752775	188.1476452	208.085269	5735.487697	2496.96289	1.199576098	4.14E-15	3.89E-13	Ila03G006260	GWHBIST00000003	16105086	16111754	-	2418	protein_coding	- && sp|Q9SCN8|CD48D_ARATH Cell division control protein 48 homolog D OS=Arabidopsis thaliana OX=3702 GN=CDC48D PE=1 SV=1 && PF00004:ATPase family associated with various cellular activities (AAA)|PF02933:Cell division protein 48 (CDC48), domain 2|PF17862:AAA+ lid domain|PF02359:Cell division protein 48 (CDC48), N-terminal domain	AAA
Ila17G001790	4353	4139	4931	4291	4027	3236	96.29383699	90.51845217	100.5412027	91.51823569	78.43136165	68.43442308	3756.498774	4528.168617	-0.269583328	0.06099702	0.153332383	Ila17G001790	GWHBIST00000017	1968627	1980749	+	4208	protein_coding	- && sp|Q9SIB9|ACO3M_ARATH Aconitate hydratase 3, mitochondrial OS=Arabidopsis thaliana OX=3702 GN=ACO3 PE=1 SV=2 && PF00694:Aconitase C-terminal domain|PF00330:Aconitase family (aconitate hydratase)	Aconitase
Ila16G015260	4367	4025	4222	4166	4070	3808	45.16751929	41.15672406	40.2495032	41.54335931	37.06258922	37.65271169	3918.304686	4265.957506	-0.122644253	0.289165367	0.470022949	Ila16G015260	GWHBIST00000016	40175692	40202065	-	9000	protein_coding	- && sp|F4IVL6|GRV2_ARATH DnaJ homolog subfamily C GRV2 OS=Arabidopsis thaliana OX=3702 GN=GRV2 PE=1 SV=1 && PF14237:GYF domain 2|PF00226:DnaJ domain	DnaJ
Ila01G001790	3864	3853	3691	4520	4303	4266	277.3209619	273.3861171	244.1680719	312.7687212	271.9037682	292.6999873	4261.420226	3860.728636	0.14246659	0.235803804	0.409710214	Ila01G001790	GWHBIST00000001	1911780	1916849	-	1297	protein_coding	- && sp|P30708|GPX4_NICSY Probable phospholipid hydroperoxide glutathione peroxidase OS=Nicotiana sylvestris OX=4096 PE=2 SV=1 && PF00255:Glutathione peroxidase	GSHPx
Ila10G005500	3114	3300	2420	4816	5310	5533	279.2587636	292.5728419	200.0335383	416.4031253	419.2576773	474.356816	5092.193174	3000.330958	0.763279228	7.66E-06	9.04E-05	Ila10G005500	GWHBIST00000010	6372109	6380410	+	1038	protein_coding	- && sp|Q9THX6|TL29_SOLLC Thylakoid lumenal 29 kDa protein, chloroplastic OS=Solanum lycopersicum OX=4081 GN=CLEB3J9 PE=3 SV=1 && PF00141:Peroxidase	-
Ila02G000220	3879	3981	4493	3812	4388	3928	203.426243	206.4007371	217.1815188	192.7433444	202.6059139	196.9313918	3936.917211	4167.754848	-0.082214404	0.41306637	0.594007065	Ila02G000220	GWHBIST00000002	2035011	2066876	+	1775	protein_coding	- && - && PF02020:eIF4-gamma/eIF5/eIF2-epsilon	-
Ila13G011000	3680	3695	3994	4584	4675	3767	116.2788244	115.4247982	116.3215345	139.6486437	130.0566997	113.7901595	4230.808794	3839.491947	0.140022336	0.25212215	0.428809234	Ila13G011000	GWHBIST00000013	23685121	23694091	-	2946	protein_coding	- && sp|P54774|CDC48_SOYBN Cell division cycle protein 48 homolog OS=Glycine max OX=3847 GN=CDC48 PE=2 SV=1 && PF02359:Cell division protein 48 (CDC48), N-terminal domain|PF00004:ATPase family associated with various cellular activities (AAA)|PF02933:Cell division protein 48 (CDC48), domain 2|PF17862:AAA+ lid domain	AAA
Ila06G010580	3270	3295	3549	5019	4673	4582	105.6183388	105.2152924	105.6566478	156.2960761	132.8879681	141.482569	4647.994032	3415.739421	0.444335087	9.56E-05	0.000782593	Ila06G010580	GWHBIST00000006	12300479	12309286	+	2882	protein_coding	- && sp|Q43644|NDUS1_SOLTU NADH dehydrogenase [ubiquinone] iron-sulfur protein 1, mitochondrial OS=Solanum tuberosum OX=4113 PE=2 SV=1 && PF00384:Molybdopterin oxidoreductase|PF13510:2Fe-2S iron-sulfur cluster binding domain|PF09326:NADH-ubiquinone oxidoreductase subunit G, C-terminal|PF10588:NADH-ubiquinone oxidoreductase-G iron-sulfur binding region	-
Ila08G015450	4347	4159	4283	4318	3859	3330	32.57232138	30.8091601	29.58056016	31.19471402	25.4584612	23.85391003	3745.337585	4324.76505	-0.20754523	0.142829883	0.287382549	Ila08G015450	GWHBIST00000008	35418771	35477486	-	12423	protein_coding	- && sp|A1Z713|VPS13_DROME Vacuolar protein sorting-associated protein 13 OS=Drosophila melanogaster OX=7227 GN=Vps13 PE=1 SV=2 && PF06650:SHR-binding domain of vacuolar-sorting associated protein 13|PF12624:N-terminal region of Chorein or VPS13|PF16910:Repeating coiled region of VPS13|PF06101:Vacuolar protein sorting-associated protein 62|PF16908:Vacuolar sorting-associated protein 13, N-terminal	-
Ila03G009420	3655	4116	5930	3668	3722	3193	312.1378536	347.5091883	466.7808173	302.0144238	279.8554232	260.6839237	3439.176818	4597.907832	-0.419011466	0.016128395	0.055583992	Ila03G009420	GWHBIST00000003	21716691	21724656	+	1090	protein_coding	- && - && PF02221:ML domain	-
Ila03G008120	3822	4609	5601	3463	3710	3039	330.3395217	393.8296674	446.2052482	288.5769533	282.3202713	251.105847	3315.274735	4720.314238	-0.509812219	0.000664737	0.00411295	Ila03G008120	GWHBIST00000003	19760039	19762951	+	1077	protein_coding	- && sp|Q9SJQ9|ALFC6_ARATH Fructose-bisphosphate aldolase 6, cytosolic OS=Arabidopsis thaliana OX=3702 GN=FBA6 PE=1 SV=1 && PF00274:Fructose-bisphosphate aldolase class-I	-
Ila14G001630	3243	2769	2436	4668	4657	6459	301.8787235	254.8240299	209.0076049	418.9437378	381.6718187	574.787233	5150.629146	2867.443719	0.845028479	2.53E-05	0.000252769	Ila14G001630	GWHBIST00000014	1847325	1848324	+	1000	protein_coding	- && sp|P36688|RK12_NICSY 50S ribosomal protein L12, chloroplastic OS=Nicotiana sylvestris OX=4096 PE=2 SV=1 && PF00542:Ribosomal protein L7/L12 C-terminal domain|PF16320:Ribosomal protein L7/L12 dimerisation domain	-
Ila20G009690	4873	4653	3700	3033	3430	4524	663.1715182	626.0288887	464.1201533	397.9615964	410.9811232	588.5838252	3579.699307	4491.049146	-0.32719301	0.106841513	0.232482561	Ila20G009690	GWHBIST00000020	12191197	12196203	+	684	protein_coding	- && sp|Q69GY7|UCRIA_SOLTU Cytochrome b6-f complex iron-sulfur subunit, chloroplastic OS=Solanum tuberosum OX=4113 GN=petC PE=2 SV=1 && PF00355:Rieske [2Fe-2S] domain|PF08802:Cytochrome B6-F complex Fe-S subunit	-
Ila14G003520	3541	4828	6200	2381	4768	2444	153.3108964	206.6551465	247.4218411	99.39070959	181.7530231	101.15901	3078.054137	4890.293949	-0.667826241	0.010202739	0.038764548	Ila14G003520	GWHBIST00000014	4030684	4034149	-	2150	protein_coding	- && sp|Q96558|UGDH1_SOYBN UDP-glucose 6-dehydrogenase 1 OS=Glycine max OX=3847 GN=UGD1 PE=2 SV=1 && PF00984:UDP-glucose/GDP-mannose dehydrogenase family, central domain|PF03721:UDP-glucose/GDP-mannose dehydrogenase family, NAD binding domain|PF03720:UDP-glucose/GDP-mannose dehydrogenase family, UDP binding domain	-
Ila19G008570	2489	1787	2043	5774	5212	6788	289.2530432	205.3096961	218.836951	646.9476195	533.2805539	754.1385579	5802.320455	2139.911501	1.439105539	1.39E-14	1.18E-12	Ila19G008570	GWHBIST00000019	23740250	23749646	+	801	protein_coding	- && sp|Q96291|BAS1A_ARATH 2-Cys peroxiredoxin BAS1, chloroplastic OS=Arabidopsis thaliana OX=3702 GN=BAS1 PE=1 SV=2 && PF00578:AhpC/TSA family|PF10417:C-terminal domain of 1-Cys peroxiredoxin	-
Ila13G004500	3555	3585	2753	4065	4134	5911	811.0824385	808.6236158	578.9363957	894.1805986	830.4130502	1289.266282	4604.830068	3359.271862	0.455028998	0.029950612	0.089793748	Ila13G004500	GWHBIST00000013	5446083	5447320	-	408	protein_coding	- && sp|Q41228|PSAEA_NICSY Photosystem I reaction center subunit IV A, chloroplastic OS=Nicotiana sylvestris OX=4096 GN=PSAEA PE=1 SV=1 && PF02427:Photosystem I reaction centre subunit IV / PsaE	-
Ila19G004070	4197	4069	4423	4102	3839	3343	197.7140741	189.5039093	192.0502177	186.3088871	159.2263825	150.5536417	3670.93623	4286.442567	-0.223672051	0.076548881	0.181579428	Ila19G004070	GWHBIST00000019	6858922	6862977	+	1976	protein_coding	- && sp|P17786|EF1A_SOLLC Elongation factor 1-alpha OS=Solanum lycopersicum OX=4081 PE=2 SV=1 && PF03144:Elongation factor Tu domain 2|PF00009:Elongation factor Tu GTP binding domain	GTP_EFTU
Ila11G000060	3579	3641	2475	4045	4846	5369	113.164302	113.8152082	72.13104138	123.3120665	134.9054393	162.2921176	4636.007449	3297.61477	0.491555706	0.015458397	0.053768156	Ila11G000060	GWHBIST00000011	477326	498966	-	2944	protein_coding	- && - && -	-
Ila20G006730	4477	4356	3318	3922	3895	3979	145.3093311	139.7739209	99.26177554	122.7307245	111.3043586	123.4629418	3839.575167	4127.915457	-0.104402356	0.538170482	0.701831213	Ila20G006730	GWHBIST00000020	7201286	7211833	-	2868	protein_coding	- && sp|B9DGY1|AB1K7_ARATH Protein ACTIVITY OF BC1 COMPLEX KINASE 7, chloroplastic OS=Arabidopsis thaliana OX=3702 GN=ABC1K7 PE=1 SV=1 && PF03109:ABC1 family	ABC1
Ila17G024370	4103	4794	4499	4000	3577	2923	44.60269793	51.52161992	45.07906025	41.92363228	34.235514	30.37698732	3416.278405	4527.947796	-0.406452769	0.009257088	0.035857686	Ila17G024370	GWHBIST00000017	47016570	47051415	+	8563	protein_coding	- && sp|F4IN58|PIEZO_ARATH Piezo-type mechanosensitive ion channel homolog OS=Arabidopsis thaliana OX=3702 GN=At2g48060/At2g48040/At2g48050 PE=2 SV=1 && PF12166:Piezo non-specific cation channel, R-Ras-binding domain	-
Ila02G000990	3538	3182	3173	4505	4966	4526	93.5622638	83.19073007	77.34143278	114.8621623	115.6239783	114.4231013	4546.507117	3349.409001	0.44095876	0.000219771	0.001587984	Ila02G000990	GWHBIST00000002	7428426	7435653	-	3520	protein_coding	- && sp|P31542|CLPAB_SOLLC ATP-dependent Clp protease ATP-binding subunit ClpA homolog CD4B, chloroplastic OS=Solanum lycopersicum OX=4081 GN=CD4B PE=3 SV=1 && PF10431:C-terminal, D2-small domain, of ClpB protein|PF07724:AAA domain (Cdc48 subfamily)|PF17871:AAA lid domain|PF02861:Clp amino terminal domain, pathogenicity island component|PF00004:ATPase family associated with various cellular activ…	Clp_N
Ila08G011110	3424	4126	5298	3860	4016	3141	197.3543874	235.1116345	281.4648922	214.5060935	203.8004009	173.0761549	3576.609168	4317.765927	-0.271761259	0.105622683	0.23037091	Ila08G011110	GWHBIST00000008	30762494	30767491	+	1615	protein_coding	- && sp|Q9FSF0|MDH_TOBAC Malate dehydrogenase OS=Nicotiana tabacum OX=4097 GN=MD1 PE=1 SV=1 && PF02866:lactate/malate dehydrogenase, alpha/beta C-terminal domain|PF00056:lactate/malate dehydrogenase, NAD binding domain	-
Ila14G025740	3175	3206	3328	4887	4868	4367	65.54643118	65.43358369	63.32685016	97.27180156	88.48184924	86.18759956	4591.828991	3280.943567	0.484956125	7.61E-06	8.99E-05	Ila14G025740	GWHBIST00000014	54428007	54451614	-	4509	protein_coding	- && sp|F4JVN6|TPPII_ARATH Tripeptidyl-peptidase 2 OS=Arabidopsis thaliana OX=3702 GN=TPP2 PE=1 SV=1 && PF12580:Tripeptidyl peptidase II|PF00082:Subtilase family	Peptidase_S8
Ila16G020660	2590	2794	2179	4572	5523	6096	137.2969244	146.426376	106.4676145	233.6719409	257.7711969	308.9315585	5263.180228	2565.854616	1.036605068	1.68E-09	5.06E-08	Ila16G020660	GWHBIST00000016	47329838	47338550	+	1756	protein_coding	- && sp|P48627|FAD6C_BRANA Omega-6 fatty acid desaturase, chloroplastic OS=Brassica napus OX=3708 PE=1 SV=1 && PF00487:Fatty acid desaturase	-
Ila04G009620	3158	3061	2746	4719	4853	5155	81.65733107	78.24890208	65.44595913	117.6446907	110.4820304	127.4289186	4793.364473	3038.04826	0.657972233	1.35E-06	1.97E-05	Ila04G009620	GWHBIST00000004	21751449	21774015	+	3600	protein_coding	- && sp|Q9FGM0|FTSHB_ARATH ATP-dependent zinc metalloprotease FTSH 11, chloroplastic/mitochondrial OS=Arabidopsis thaliana OX=3702 GN=FTSH11 PE=1 SV=1 && PF01434:Peptidase family M41|PF17862:AAA+ lid domain|PF00076:RNA recognition motif. (a.k.a. RRM, RBD, or RNP domain)|PF11835:RRM-like domain|PF00004:ATPase family associated with various cellular activities (AAA)	AAA
Ila19G004420	2460	2247	2394	4825	7287	4448	486.1829855	439.0354503	436.1019651	919.3931555	1267.978001	840.3993349	5340.405562	2401.1077	1.15336535	6.49E-11	2.71E-09	Ila19G004420	GWHBIST00000019	7584621	7586718	-	471	protein_coding	- && sp|P0CG85|UBI1P_NICSY Polyubiquitin OS=Nicotiana sylvestris OX=4096 GN=UBI11 PE=2 SV=1 && PF00240:Ubiquitin family	ubiquitin
Ila16G004260	4426	4082	3337	4162	3775	3850	173.3276242	158.0378972	120.4513937	157.1439805	130.158229	144.1363023	3840.417777	4021.814616	-0.066541461	0.691501293	0.817385832	Ila16G004260	GWHBIST00000016	5074747	5084776	-	2377	protein_coding	- && - && PF08547:Complex I intermediate-associated protein 30 (CIA30)|PF13460:NAD(P)H-binding	-
Ila10G001350	4300	4020	4276	4207	3866	2942	258.2392868	238.677664	236.695937	243.5934855	204.4155868	168.9090031	3580.878401	4258.229171	-0.249937171	0.115768569	0.246653112	Ila10G001350	GWHBIST00000010	1242048	1244224	-	1550	protein_coding	- && sp|Q7XZQ7|FL3H_PETCR Flavanone 3-dioxygenase OS=Petroselinum crispum OX=4043 GN=FHT PE=1 SV=1 && PF14226:non-haem dioxygenase in morphine synthesis N-terminal|PF03171:2OG-Fe(II) oxygenase superfamily	2OG-FeII_Oxy
Ila13G007490	4802	4056	3388	3357	3543	4387	479.0998868	400.0679183	311.5634919	322.9197096	311.2242041	418.434822	3677.617998	4160.310958	-0.177885109	0.359556292	0.542987609	Ila13G007490	GWHBIST00000013	16586618	16587550	-	933	protein_coding	- && sp|Q39963|PDX1_HEVBR Probable pyridoxal 5'-phosphate synthase subunit PDX1 OS=Hevea brasiliensis OX=3981 GN=PDX1 PE=2 SV=1 && PF01680:SOR/SNZ family	-
Ila03G012160	4021	3614	3977	4198	4106	3578	63.23700448	56.18976711	57.64903682	63.6530107	56.85314075	53.79399829	3863.460537	3924.984567	-0.022794199	0.853603462	0.9206672	Ila03G012160	GWHBIST00000003	26065500	26149231	+	5919	protein_coding	- && sp|Q84M24|AB1A_ARATH ABC transporter A family member 1 OS=Arabidopsis thaliana OX=3702 GN=ABCA1 PE=2 SV=2 && PF00005:ABC transporter|PF12698:ABC-2 family transporter protein	ABC_tran
Ila07G006800	3520	3814	4640	3679	3978	3811	116.0692937	124.3332352	141.0236357	116.9617252	115.4882384	120.1350958	3727.392816	4032.28982	-0.113546082	0.349918794	0.533401294	Ila07G006800	GWHBIST00000007	20841204	20867486	+	2823	protein_coding	- && sp|Q38950|2AAB_ARATH Serine/threonine-protein phosphatase 2A 65 kDa regulatory subunit A beta isoform OS=Arabidopsis thaliana OX=3702 GN=PP2AA2 PE=1 SV=2 && PF13646:HEAT repeats|PF03398:Regulator of Vps4 activity in the MVB pathway	-
Ila08G003230	3594	4323	5266	4063	3411	2731	141.9999995	168.8602287	191.7742855	154.7734245	118.6561601	103.1545153	3322.52032	4434.635945	-0.416624205	0.026964294	0.0830969	Ila08G003230	GWHBIST00000008	5215294	5218081	-	2356	protein_coding	- && sp|Q9FWA3|6PGD2_ARATH 6-phosphogluconate dehydrogenase, decarboxylating 2 OS=Arabidopsis thaliana OX=3702 GN=PGD2 PE=1 SV=1 && PF03446:NAD binding domain of 6-phosphogluconate dehydrogenase|PF00393:6-phosphogluconate dehydrogenase, C-terminal domain	NAD_binding_2
Ila14G017160	2523	3334	2641	4435	5796	4652	130.9852874	171.1207716	126.3784185	221.9924429	264.9304906	230.8879379	4819.70771	2877.039095	0.744473338	3.46E-06	4.52E-05	Ila14G017160	GWHBIST00000014	41102895	41106457	-	1793	protein_coding	- && sp|Q04960|DNJH_CUCSA DnaJ protein homolog OS=Cucumis sativus OX=3659 GN=DNAJ1 PE=2 SV=1 && PF00226:DnaJ domain|PF00684:DnaJ central domain|PF01556:DnaJ C terminal domain	DnaJ_C
Ila04G009020	3279	4894	7328	1980	3078	2631	176.8423109	260.9399636	364.2750898	102.9554295	146.154328	135.6506519	2486.918482	5184.138581	-1.059751565	2.27E-05	0.000230476	Ila04G009020	GWHBIST00000004	21231225	21234426	+	1726	protein_coding	- && sp|P37392|TBB1_LUPAL Tubulin beta-1 chain OS=Lupinus albus OX=3870 GN=TUBB1 PE=3 SV=1 && PF03953:Tubulin C-terminal domain|PF00091:Tubulin/FtsZ family, GTPase domain	Tubulin
Ila09G006840	4315	4811	3619	3517	3105	3803	666.1147403	734.235652	514.9393443	523.4556742	422.0152537	561.2428765	3402.345866	4324.960784	-0.346169168	0.052197292	0.136325592	Ila09G006840	GWHBIST00000009	9988522	9989124	+	603	protein_coding	- && sp|Q43517|FER1_SOLLC Ferredoxin-1, chloroplastic OS=Solanum lycopersicum OX=4081 GN=SEND33 PE=2 SV=1 && PF00111:2Fe-2S iron-sulfur cluster binding domain	Fer2
Ila17G016300	3615	3565	4141	3861	4391	3566	138.1390846	134.6789352	145.8521217	142.2483945	147.7304462	130.270441	3833.669274	3819.263774	0.005443788	0.961122737	0.98048981	Ila17G016300	GWHBIST00000017	37570085	37577695	+	2436	protein_coding	- && sp|P54774|CDC48_SOYBN Cell division cycle protein 48 homolog OS=Glycine max OX=3847 GN=CDC48 PE=2 SV=1 && PF02933:Cell division protein 48 (CDC48), domain 2|PF00004:ATPase family associated with various cellular activities (AAA)|PF02359:Cell division protein 48 (CDC48), N-terminal domain|PF17862:AAA+ lid domain	AAA
Ila14G010950	3329	3638	2848	4011	4335	4951	105.1880996	113.6442262	82.94535059	122.1925633	120.5980306	149.5553703	4328.449076	3329.27932	0.378702497	0.02179215	0.070473443	Ila14G010950	GWHBIST00000014	22411126	22449198	-	2946	protein_coding	- && sp|F4IV66|RNE_ARATH Ribonuclease E/G-like protein, chloroplastic OS=Arabidopsis thaliana OX=3702 GN=RNE PE=1 SV=1 && PF10150:Ribonuclease E/G family	-
Ila11G005250	3859	3941	3514	3853	3804	3947	183.1819767	184.946563	153.7478206	176.3381463	158.9815662	179.1147542	3777.79191	3832.442069	-0.020693295	0.87344089	0.931172596	Ila11G005250	GWHBIST00000011	20932092	20941658	+	1961	protein_coding	- && sp|Q94AR8|LEUC_ARATH 3-isopropylmalate dehydratase large subunit, chloroplastic OS=Arabidopsis thaliana OX=3702 GN=IIL1 PE=1 SV=1 && PF00330:Aconitase family (aconitate hydratase)	Aconitase
Ila07G000130	3173	2912	2366	4141	5054	5248	253.7480118	230.2267666	174.4000338	319.2839634	355.8492982	401.2200934	4691.786372	2869.832622	0.70929628	4.52E-05	0.000415578	Ila07G000130	GWHBIST00000007	1107875	1183201	+	1164	protein_coding	- && sp|O82660|P2SAF_ARATH Photosystem II stability/assembly factor HCF136, chloroplastic OS=Arabidopsis thaliana OX=3702 GN=HCF136 PE=1 SV=1 && PF14870:Photosynthesis system II assembly factor YCF48	-
Ila06G007790	4341	5539	4820	3196	2427	2520	111.5647242	140.734425	114.1782538	79.19234083	54.91679542	61.91472145	2658.812783	4970.796999	-0.902795856	3.01E-07	5.29E-06	Ila06G007790	GWHBIST00000006	7999356	8008392	+	3622	protein_coding	- && sp|F4J394|KN7G_ARATH Kinesin-like protein KIN-7G OS=Arabidopsis thaliana OX=3702 GN=KIN7G PE=2 SV=1 && PF00225:Kinesin motor domain|PF11995:Domain of unknown function (DUF3490)	Kinesin
Ila20G011360	3489	3412	4335	4015	3999	3502	100.6439238	97.30328016	115.2590249	111.6635524	101.5631811	96.57372984	3743.789385	3784.946422	-0.015878402	0.901245845	0.946473455	Ila20G011360	GWHBIST00000020	16272576	16289959	-	3227	protein_coding	- && sp|Q9SIV2|PSD2A_ARATH 26S proteasome non-ATPase regulatory subunit 2 homolog A OS=Arabidopsis thaliana OX=3702 GN=RPN1A PE=1 SV=2 && PF18051:26S proteasome non-ATPase regulatory subunit RPN1 C-terminal|PF17781:RPN1/RPN2 N-terminal domain	-
Ila02G006670	4099	4446	5309	2538	3518	2700	239.3729971	256.6838621	285.7651164	142.89866	180.8803437	150.7361004	2832.492302	4666.879322	-0.720301682	5.38E-07	8.78E-06	Ila02G006670	GWHBIST00000002	16392377	16396657	+	1594	protein_coding	- && sp|P32289|GLNA_VIGAC Glutamine synthetase nodule isozyme OS=Vigna aconitifolia OX=3918 PE=2 SV=1 && PF00120:Glutamine synthetase, catalytic domain|PF03951:Glutamine synthetase, beta-Grasp domain	-
Ila18G016230	4554	5167	6689	2280	1834	1963	263.4647627	295.528821	356.6891973	127.17556	93.41726402	108.5690616	1983.334498	5517.361906	-1.476254353	8.62E-18	1.19E-15	Ila18G016230	GWHBIST00000018	37668681	37672211	+	1609	protein_coding	- && sp|Q2KNL5|CADH1_OCIBA Cinnamyl alcohol dehydrogenase 1 OS=Ocimum basilicum OX=39350 GN=CAD1 PE=1 SV=1 && PF08240:Alcohol dehydrogenase GroES-like domain|PF00107:Zinc-binding dehydrogenase	ADH_N
Ila17G017100	3701	3364	3506	3971	3921	3955	173.5577975	155.9598827	151.5431134	179.5412447	161.8900613	177.3077853	3856.025244	3575.9452	0.108787533	0.354832956	0.538203162	Ila17G017100	GWHBIST00000017	38837630	38852695	-	1985	protein_coding	- && sp|O49169|EF1A_MANES Elongation factor 1-alpha OS=Manihot esculenta OX=3983 GN=EF1 PE=3 SV=1 && PF00009:Elongation factor Tu GTP binding domain|PF03144:Elongation factor Tu domain 2|PF03143:Elongation factor Tu C-terminal domain	GTP_EFTU
Ila03G009750	3517	4923	6643	2102	2784	2408	114.2702818	158.1330448	198.9410615	65.84653725	79.63948832	74.7951926	2363.374123	5057.004583	-1.097453669	7.58E-08	1.55E-06	Ila03G009750	GWHBIST00000003	22175647	22181174	-	2865	protein_coding	- && sp|Q42699|METE_CATRO 5-methyltetrahydropteroyltriglutamate--homocysteine methyltransferase OS=Catharanthus roseus OX=4058 GN=METE PE=2 SV=1 && PF08267:Cobalamin-independent synthase, N-terminal domain|PF01717:Cobalamin-independent synthase, Catalytic domain	-
Ila16G017770	3511	3490	2884	3796	4010	4643	189.1353239	185.8656405	143.1977923	197.1547847	190.1886041	239.1094685	4053.801816	3353.285146	0.27375744	0.092826527	0.209802972	Ila16G017770	GWHBIST00000016	43662643	43667939	-	1728	protein_coding	- && sp|Q8W593|LGUC_ARATH Probable lactoylglutathione lyase, chloroplastic OS=Arabidopsis thaliana OX=3702 GN=At1g67280 PE=1 SV=1 && PF00903:Glyoxalase/Bleomycin resistance protein/Dioxygenase superfamily	Glyoxalase
Ila16G025080	2345	5205	3960	1960	6306	2547	116.172042	254.9243834	180.8228086	93.61687651	275.0496158	120.6268518	3442.91633	3883.583879	-0.173725839	0.758242648	0.860566436	Ila16G025080	GWHBIST00000016	53230202	53232345	+	1879	protein_coding	- && sp|A0A068Q7V0|C7916_PRUMU Phenylalanine N-monooxygenase CYP79D16 OS=Prunus mume OX=102107 GN=CYP79D16 PE=1 SV=1 && PF00067:Cytochrome P450	p450
Ila20G002700	4214	5849	4158	2793	2309	3000	423.155854	580.6565255	384.848285	270.405834	204.139974	287.9939398	2647.113732	4820.657184	-0.864873579	1.55E-05	0.000164438	Ila20G002700	GWHBIST00000020	2513044	2513970	+	927	protein_coding	- && sp|Q9SZ42|FAD4_ARATH Fatty acid desaturase 4, chloroplastic OS=Arabidopsis thaliana OX=3702 GN=FAD4 PE=1 SV=1 && PF10520:B domain of TMEM189, localisation domain	-
Ila15G009610	3624	3493	3611	3474	4299	3788	88.96217998	84.77107309	81.70412144	82.22167903	92.91438847	88.89625597	3749.348472	3627.297284	0.047865837	0.667574078	0.800736649	Ila15G009610	GWHBIST00000015	12920242	12933241	+	3792	protein_coding	- && sp|Q04264|PDS5_YEAST Sister chromatid cohesion protein PDS5 OS=Saccharomyces cerevisiae (strain ATCC 204508 / S288c) OX=559292 GN=PDS5 PE=1 SV=1 && -	-
Ila15G000180	3186	3088	2888	3534	4817	4693	185.242228	177.5020542	154.7713824	198.107113	246.5864287	260.8561324	4230.08708	3102.738768	0.447256027	0.003163626	0.01501023	Ila15G000180	GWHBIST00000015	197902	202156	-	1601	protein_coding	- && - && -	-
Ila16G018480	3514	3616	2748	3833	4125	4357	75.64872768	76.95913192	54.52753281	79.5569252	78.184763	89.66928426	4006.222096	3354.056522	0.256426585	0.122209235	0.2569752	Ila16G018480	GWHBIST00000016	44557336	44568455	+	4324	protein_coding	- && sp|Q9LHF5|VIL1_ARATH VIN3-like protein 1 OS=Arabidopsis thaliana OX=3702 GN=VIL1 PE=1 SV=1 && PF10609:NUBPL iron-transfer P-loop NTPase|PF01883:Iron-sulfur cluster assembly protein|PF07227:PHD - plant homeodomain finger protein	-
Ila17G008180	4190	3959	3009	3373	3289	4361	187.8764001	175.4993759	124.3596936	145.8189101	129.84355	186.9392802	3596.375179	3791.770727	-0.076304047	0.704985013	0.825764376	Ila17G008180	GWHBIST00000017	12096133	12101256	-	2076	protein_coding	- && sp|Q76FS5|SPS2_ARATH Solanesyl diphosphate synthase 2, chloroplastic OS=Arabidopsis thaliana OX=3702 GN=SPS2 PE=1 SV=1 && PF00348:Polyprenyl synthetase	-
Ila02G005490	2173	2000	1640	5115	4956	6262	82.73064668	75.27808387	57.55059119	187.7550515	166.125496	227.9166372	5326.977459	1973.676873	1.43254636	6.28E-15	5.57E-13	Ila02G005490	GWHBIST00000002	14639086	14643465	+	2445	protein_coding	- && sp|Q9M7J4|MFP1_TOBAC MAR-binding filament-like protein 1-1 OS=Nicotiana tabacum OX=4097 GN=MFP1-1 PE=2 SV=1 && -	-
Ila02G008640	2849	2514	3338	5387	4254	3792	81.45047273	71.05559835	87.96030788	148.4866588	107.0771851	103.6396078	4379.810071	2932.034932	0.57886695	0.001063721	0.006121742	Ila02G008640	GWHBIST00000002	18474947	18480322	+	3256	protein_coding	- && sp|M1BJF6|JOKA2_SOLTU Protein JOKA2 OS=Solanum tuberosum OX=4113 GN=JOKA2 PE=1 SV=1 && PF00569:Zinc finger, ZZ type|PF16158:Ig-like domain from next to BRCA1 gene|PF00564:PB1 domain	ZZ
Ila11G003280	3573	5124	7112	2098	2195	1968	160.0563944	226.9242985	293.650679	90.61180806	86.57108045	84.2793892	2034.627751	5296.486705	-1.380347067	4.28E-11	1.87E-09	Ila11G003280	GWHBIST00000011	15261748	15264830	-	2078	protein_coding	- && sp|P68172|SAHH_NICSY Adenosylhomocysteinase OS=Nicotiana sylvestris OX=4096 GN=SAHH PE=2 SV=1 && PF00670:S-adenosyl-L-homocysteine hydrolase, NAD binding domain|PF05221:S-adenosyl-L-homocysteine hydrolase	-
Ila02G011410	3563	3121	2867	4184	3892	4431	177.5515658	153.756796	131.6847931	201.020181	170.7575111	211.0895367	4077.339649	3238.782787	0.332210922	0.035097026	0.101177147	Ila02G011410	GWHBIST00000002	22256783	22268657	+	1868	protein_coding	- && sp|Q9AXU3|SPA15_IPOBA Senescence-associated protein SPA15, chloroplastic OS=Ipomoea batatas OX=4120 GN=SPA15 PE=2 SV=1 && -	-
Ila06G003230	3518	4545	5769	3092	2905	2205	169.1515721	216.0458649	255.6701291	143.3372236	122.9772112	101.3549747	2665.589266	4646.265533	-0.801687202	3.61E-05	0.000341721	Ila06G003230	GWHBIST00000006	3119047	3123618	+	1936	protein_coding	- && sp|Q94KT8|COBRA_ARATH Protein COBRA OS=Arabidopsis thaliana OX=3702 GN=COB PE=2 SV=1 && PF04833:COBRA-like protein	-
Ila06G012040	4204	4192	4902	3039	2910	2678	311.572145	307.1489665	334.8640089	217.1530414	189.8834903	189.7416889	2806.939066	4485.175958	-0.676284793	8.81E-09	2.24E-07	Ila06G012040	GWHBIST00000006	16122831	16124900	+	1256	protein_coding	- && sp|P59169|H33_ARATH Histone H3.3 OS=Arabidopsis thaliana OX=3702 GN=HTR4 PE=1 SV=2 && PF00125:Core histone H2A/H2B/H3/H4	Histone
Ila15G020210	2318	2130	1786	4808	4768	6075	140.2039883	127.3674363	99.56980106	280.3823652	253.9109809	351.2768187	5103.780365	2115.934178	1.27036852	3.29E-12	1.77E-10	Ila15G020210	GWHBIST00000015	51733847	51739332	+	1539	protein_coding	- && sp|Q9ST69|RR5_SPIOL 30S ribosomal protein S5, chloroplastic OS=Spinacia oleracea OX=3562 GN=rps5 PE=1 SV=1 && PF03719:Ribosomal protein S5, C-terminal domain|PF00333:Ribosomal protein S5, N-terminal domain	-
Ila16G012200	3497	3594	2631	3811	3629	4694	51.4497601	52.27543581	35.67860112	54.05874636	47.00813162	66.02175724	3958.905421	3302.956225	0.26138281	0.180766915	0.341010936	Ila16G012200	GWHBIST00000016	33874203	33895457	-	6327	protein_coding	- && sp|F4JKH6|TSS_ARATH Protein TSS OS=Arabidopsis thaliana OX=3702 GN=TSS PE=1 SV=1 && PF15044:Mitochondrial function, CLU-N-term|PF13424:Tetratricopeptide repeat|PF12807:Translation initiation factor eIF3 subunit 135	-
Ila08G012220	2693	3537	4627	3572	4219	3174	38.78113916	50.35598968	61.41620206	49.59466467	53.49239391	43.69657556	3553.115818	3644.366925	-0.036641469	0.843859823	0.915138568	Ila08G012220	GWHBIST00000008	32341041	32351495	-	6464	protein_coding	- && sp|F4JIF4|NET1B_ARATH Protein NETWORKED 1B OS=Arabidopsis thaliana OX=3702 GN=NET1B PE=2 SV=1 && PF07765:KIP1-like protein	-
Ila06G008030	3678	3394	3473	3787	3982	3502	27.99895684	25.54311342	24.3688008	27.79487535	26.68883901	25.48605056	3661.94342	3567.663377	0.037700969	0.741989666	0.850613783	Ila06G008030	GWHBIST00000006	8254573	8294765	+	12228	protein_coding	- && sp|Q9Y4A5|TRRAP_HUMAN Transformation/transcription domain-associated protein OS=Homo sapiens OX=9606 GN=TRRAP PE=1 SV=3 && PF02260:FATC domain|PF02259:FAT domain|PF00454:Phosphatidylinositol 3- and 4-kinase	PI3_PI4_kinase
Ila14G012050	3330	4093	5295	2543	3628	2904	164.9692537	200.462152	241.782013	121.4631209	158.2429442	137.5345024	2935.91642	4272.661829	-0.541316852	0.002384666	0.0118987	Ila14G012050	GWHBIST00000014	27087800	27091076	+	1879	protein_coding	- && sp|P53492|ACT7_ARATH Actin-7 OS=Arabidopsis thaliana OX=3702 GN=ACT7 PE=1 SV=1 && PF00022:Actin	Actin
Ila08G003650	4148	5810	5065	3840	1815	1100	106.7224389	147.7831753	120.1145703	95.25494214	41.11420749	27.05614709	2214.207028	5075.631876	-1.196822399	0.035054827	0.101146874	Ila08G003650	GWHBIST00000008	6034503	6049988	-	3618	protein_coding	- && sp|Q9LMX4|PPA1_ARATH Probable inactive purple acid phosphatase 1 OS=Arabidopsis thaliana OX=3702 GN=PAP1 PE=2 SV=1 && PF17808:Fn3-like domain from Purple Acid Phosphatase|PF00149:Calcineurin-like phosphoesterase|PF16656:Purple acid Phosphatase, N-terminal domain|PF14008:Iron/zinc purple acid phosphatase-like protein C	Metallophos
Ila17G017360	5230	4464	4477	2632	2454	2520	646.5353404	545.5651666	510.1253701	313.7008999	267.0935735	297.8155658	2477.544808	4800.014451	-0.954167833	1.58E-11	7.61E-10	Ila17G017360	GWHBIST00000017	39268613	39271194	+	753	protein_coding	- && sp|P48534|APX1_PEA L-ascorbate peroxidase, cytosolic OS=Pisum sativum OX=3888 GN=APX1 PE=1 SV=2 && PF00141:Peroxidase	-
Ila13G000640	3214	3232	2769	4241	4170	4132	84.63344332	84.13938974	67.20759309	107.6722306	96.67863127	104.0190117	4082.176151	3123.890336	0.386074354	0.005229769	0.022685173	Ila13G000640	GWHBIST00000013	646226	656540	-	3535	protein_coding	- && sp|Q8VZF3|CGEP_ARATH Probable glutamyl endopeptidase, chloroplastic OS=Arabidopsis thaliana OX=3702 GN=GEP PE=2 SV=2 && PF00326:Prolyl oligopeptidase family	-
Ila15G023320	4273	3917	3805	2958	3518	3213	146.7740095	133.0153325	120.4675769	97.96111835	106.3923497	105.5074832	3144.608044	4061.986906	-0.369182838	0.003106442	0.014781258	Ila15G023320	GWHBIST00000015	55809580	55814166	+	2710	protein_coding	- && sp|O23482|OPT3_ARATH Oligopeptide transporter 3 OS=Arabidopsis thaliana OX=3702 GN=OPT3 PE=2 SV=3 && PF03169:OPT oligopeptide transporter protein	OPT
Ila14G014520	2759	3479	4778	4151	3507	2891	89.20631341	111.2065039	142.3932115	129.400491	99.83388168	89.3610484	3434.880045	3695.90242	-0.105779071	0.611887632	0.757988668	Ila14G014520	GWHBIST00000014	33521149	33527840	-	2879	protein_coding	- && sp|Q41142|PLDA1_RICCO Phospholipase D alpha 1 OS=Ricinus communis OX=3988 GN=PLD1 PE=1 SV=1 && PF00168:C2 domain|PF00614:Phospholipase D Active site motif|PF12357:Phospholipase D C terminal	C2
Ila15G008500	3502	3349	3097	3614	3792	4181	94.51668989	89.35922159	77.04293438	94.04155671	90.10709546	107.8769854	3771.764386	3369.993192	0.162535109	0.240889694	0.415805057	Ila15G008500	GWHBIST00000015	10965562	10978142	+	3449	protein_coding	- && sp|Q8RWY7|CYP95_ARATH Peptidyl-prolyl cis-trans isomerase CYP95 OS=Arabidopsis thaliana OX=3702 GN=CYP95 PE=1 SV=2 && PF00160:Cyclophilin type peptidyl-prolyl cis-trans isomerase/CLD	Pro_isomerase
Ila03G012700	4489	4371	3423	2993	1986	4222	274.3691377	264.1181989	192.8376367	176.3728242	106.871818	246.6948903	3022.43244	4171.004781	-0.46474363	0.087037601	0.199934698	Ila03G012700	GWHBIST00000003	26940151	26943989	-	1523	protein_coding	- && sp|Q8TWR2|G3PP_METKA Glyceraldehyde 3-phosphate phosphatase OS=Methanopyrus kandleri (strain AV19 / DSM 6324 / JCM 9639 / NBRC 100938) OX=190192 GN=MK0970 PE=3 SV=2 && PF13419:Haloacid dehalogenase-like hydrolase	-
Ila14G015240	3309	3781	3335	4270	3187	3502	193.7247901	218.8401364	179.963122	241.0214009	164.2739862	196.0021548	3580.279511	3528.063702	0.021132396	0.901752794	0.946877187	Ila14G015240	GWHBIST00000014	35328636	35357845	+	1590	protein_coding	- && sp|Q8L7S6|HEXO3_ARATH Beta-hexosaminidase 3 OS=Arabidopsis thaliana OX=3702 GN=HEXO3 PE=1 SV=1 && PF14845:beta-acetyl hexosaminidase like|PF00728:Glycosyl hydrolase family 20, catalytic domain	Glyco_hydro_20
Ila09G000870	3249	3271	2598	3540	4199	4489	238.5151743	237.3989066	175.794263	250.5583406	271.4003963	315.0447019	3974.448521	3094.588557	0.361110682	0.030992082	0.092177195	Ila09G000870	GWHBIST00000009	852106	857277	+	1268	protein_coding	- && sp|Q42564|APX3_ARATH L-ascorbate peroxidase 3 OS=Arabidopsis thaliana OX=3702 GN=APX3 PE=1 SV=1 && PF00141:Peroxidase	-
Ila16G015190	3314	3498	4329	3207	3488	3505	61.35398719	64.02387558	73.87153466	57.24381199	56.85452869	62.03468508	3316.396477	3751.65303	-0.178038877	0.15504931	0.305431118	Ila16G015190	GWHBIST00000016	40030661	40043109	-	5028	protein_coding	- && sp|O81016|AB32G_ARATH ABC transporter G family member 32 OS=Arabidopsis thaliana OX=3702 GN=ABCG32 PE=1 SV=1 && PF01061:ABC-2 type transporter|PF08370:Plant PDR ABC transporter associated|PF00005:ABC transporter|PF14510:ABC-transporter N-terminal	ABC2_membrane
Ila16G011660	2846	3144	2261	3677	4388	4919	162.6295153	177.6146878	119.0869802	202.5803893	220.7645778	268.7185002	4221.797407	2802.059769	0.591469394	0.001559463	0.008381296	Ila16G011660	GWHBIST00000016	32279404	32298509	+	1629	protein_coding	- && sp|Q38885|SCY1_ARATH Preprotein translocase subunit SCY1, chloroplastic OS=Arabidopsis thaliana OX=3702 GN=SCY1 PE=1 SV=2 && PF00344:SecY translocase	-
Ila12G005390	3679	3469	2505	3122	3501	4922	494.1765231	460.6684707	310.1410838	404.3193439	414.0404125	632.0482065	3764.03619	3282.83731	0.197382217	0.392070421	0.573705468	Ila12G005390	GWHBIST00000012	23515700	23522510	-	693	protein_coding	- && sp|Q9SQL2|CB24_PEA Chlorophyll a-b binding protein P4, chloroplastic OS=Pisum sativum OX=3888 GN=lhcA-P4 PE=1 SV=1 && PF00504:Chlorophyll A-B binding protein	-
Ila16G011220	3508	4030	3593	3634	3267	3125	68.71771485	78.04517126	64.87324018	68.63305754	56.34515253	58.52149583	3265.443583	3766.141352	-0.20583625	0.138646018	0.281726861	Ila16G011220	GWHBIST00000016	30181515	30191606	+	4752	protein_coding	- && sp|Q9C9U5|SIS8_ARATH Probable serine/threonine-protein kinase SIS8 OS=Arabidopsis thaliana OX=3702 GN=SIS8 PE=1 SV=1 && PF07714:Protein tyrosine kinase|PF00564:PB1 domain	Pkinase_Tyr
Ila18G010040	3045	3413	4963	3734	3327	2667	182.0472994	201.7274968	273.4893804	215.2338414	175.1249582	152.4320294	3164.83807	3832.295199	-0.276186466	0.161570446	0.314650338	Ila18G010040	GWHBIST00000018	25322905	25340926	-	1557	protein_coding	- && sp|P38661|PDIA6_MEDSA Probable protein disulfide-isomerase A6 OS=Medicago sativa OX=3879 PE=2 SV=1 && PF00085:Thioredoxin|PF07749:Endoplasmic reticulum protein ERp29, C-terminal domain	-
Ila03G008060	3113	3752	4381	4357	3045	2485	141.7004941	168.8445089	183.8081422	191.2137432	122.0331554	108.1371475	3227.020925	3785.829005	-0.230498249	0.298074547	0.479263194	Ila03G008060	GWHBIST00000003	19601433	19607448	+	2045	protein_coding	- && sp|P26300|ENO_SOLLC Enolase OS=Solanum lycopersicum OX=4081 GN=PGH1 PE=2 SV=1 && PF03952:Enolase, N-terminal domain|PF00113:Enolase, C-terminal TIM barrel domain	-
Ila15G000710	3855	4137	4367	2620	3240	2910	106.1679027	112.6383408	110.8539816	69.56798858	78.56193403	76.61576058	2844.712882	4172.66608	-0.552614231	5.18E-07	8.49E-06	Ila15G000710	GWHBIST00000015	860558	870480	+	3380	protein_coding	- && sp|Q8RY59|RCD1_ARATH Inactive poly [ADP-ribose] polymerase RCD1 OS=Arabidopsis thaliana OX=3702 GN=RCD1 PE=1 SV=1 && PF00644:Poly(ADP-ribose) polymerase catalytic domain|PF12174:RCD1-SRO-TAF4 (RST) plant domain	-
Ila10G004820	3835	3534	3647	3432	3449	3189	30.71109654	27.97875386	26.91937464	26.49820976	24.31764138	24.41410154	3274.73959	3726.546522	-0.186437302	0.10472774	0.228827942	Ila10G004820	GWHBIST00000010	5308404	5325799	+	11624	protein_coding	- && sp|Q8GY23|UPL1_ARATH E3 ubiquitin-protein ligase UPL1 OS=Arabidopsis thaliana OX=3702 GN=UPL1 PE=1 SV=3 && PF06012:Domain of Unknown Function (DUF908)|PF06025:Domain of Unknown Function (DUF913)|PF14377:Ubiquitin binding region|PF00627:UBA/TS-N domain|PF00632:HECT-domain (ubiquitin-transferase)	HECT
Ila05G000770	2572	2504	2315	4434	4648	4604	58.45162273	56.25897306	48.49264265	97.15398	93.00151597	100.0269889	4451.040271	2503.335744	0.830408056	1.51E-11	7.32E-10	Ila05G000770	GWHBIST00000005	5712659	5804758	-	4096	protein_coding	- && sp|F4J3N2|FTSI5_ARATH Probable inactive ATP-dependent zinc metalloprotease FTSHI 5, chloroplastic OS=Arabidopsis thaliana OX=3702 GN=FTSHI5 PE=2 SV=1 && PF01434:Peptidase family M41|PF00004:ATPase family associated with various cellular activities (AAA)	AAA
Ila06G008280	3352	3730	3620	3113	3585	3669	177.5897127	195.3684784	176.7753125	159.0128476	167.2250194	185.8308352	3369.22779	3617.04863	-0.102382301	0.395522377	0.576899878	Ila06G008280	GWHBIST00000006	8637425	8644544	+	1757	protein_coding	- && sp|U3KRF2|DHQS_ACTCC 3-dehydroquinate synthase, chloroplastic OS=Actinidia chinensis var. chinensis OX=1590841 GN=DHQS PE=1 SV=3 && PF01761:3-dehydroquinate synthase	-
Ila15G002260	3365	3307	3280	3622	4092	3402	42.20930421	41.00994503	37.9224351	43.80370748	45.1915305	40.79563583	3606.923806	3366.56047	0.099619596	0.374024493	0.556017625	Ila15G002260	GWHBIST00000015	3047014	3066743	+	7421	protein_coding	- && - && PF05641:Agenet domain	Agenet
Ila02G010680	3500	3680	4043	3399	3153	3276	342.9493589	356.4853092	365.144649	321.1089534	272.0095938	306.8754288	3201.795487	3787.320075	-0.242447038	0.039396011	0.110349758	Ila02G010680	GWHBIST00000002	21211113	21213194	-	950	protein_coding	- && sp|P59169|H33_ARATH Histone H3.3 OS=Arabidopsis thaliana OX=3702 GN=HTR4 PE=1 SV=2 && PF00125:Core histone H2A/H2B/H3/H4	Histone
Ila18G015230	4357	4301	4940	2501	2731	2206	249.8932909	243.8755976	261.1519264	138.2993146	137.9072304	120.9563901	2413.890756	4588.284091	-0.926564168	7.09E-16	7.18E-14	Ila18G015230	GWHBIST00000018	36494186	36499907	+	1623	protein_coding	- && sp|O48651|SQE1_PANGI Squalene monooxygenase SE1 OS=Panax ginseng OX=4054 GN=SQE1 PE=2 SV=1 && PF08491:Squalene epoxidase	-
Ila0G009860	3578	3569	2967	3739	3397	3760	108.9151795	107.4054925	83.24628661	109.7344117	91.04202778	109.4188617	3552.246347	3430.534344	0.050322609	0.748028488	0.85471129	Ila0G009860	GWHBIST00000135	94813	110633	-	3058	protein_coding	- && sp|Q55680|Y005_SYNY3 Uncharacterized protein sll0005 OS=Synechocystis sp. (strain PCC 6803 / Kazusa) OX=1111708 GN=sll0005 PE=3 SV=1 && PF03109:ABC1 family	ABC1
Ila17G010240	2631	2625	2276	3835	4799	4844	137.4354297	135.5623322	109.5845586	193.1445795	220.7124881	241.901334	4376.046654	2553.071497	0.777529556	2.40E-07	4.32E-06	Ila17G010240	GWHBIST00000017	20334907	20391054	+	1782	protein_coding	- && sp|Q9LJE2|SYKM_ARATH Lysine--tRNA ligase, chloroplastic/mitochondrial OS=Arabidopsis thaliana OX=3702 GN=OVA5 PE=2 SV=1 && PF01336:OB-fold nucleic acid binding domain|PF00152:tRNA synthetases class II (D, K and N)	tRNA-synt_2
Ila14G010600	3762	4331	5435	2191	3212	2068	146.2784	166.4874347	194.7871068	82.13780393	109.9601306	76.87200647	2411.339021	4550.256465	-0.916012697	4.75E-07	7.89E-06	Ila14G010600	GWHBIST00000014	19871239	19878535	-	2394	protein_coding	- && sp|Q9XEL8|HMDH2_CAPAN 3-hydroxy-3-methylglutaryl-coenzyme A reductase 2 OS=Capsicum annuum OX=4072 GN=HMGR2 PE=2 SV=1 && PF00368:Hydroxymethylglutaryl-coenzyme A reductase	-
Ila03G004260	4021	3737	4330	2839	3200	2853	287.4806678	264.1371803	285.3393823	195.6947902	201.429396	194.9991041	2887.044701	4080.793607	-0.499238858	1.40E-06	2.03E-05	Ila03G004260	GWHBIST00000003	6646973	6649934	+	1302	protein_coding	- && sp|B4FUS3|CNR8_MAIZE Cell number regulator 8 OS=Zea mays OX=4577 GN=CNR8 PE=2 SV=1 && PF04749:PLAC8 family	-
Ila17G010210	2717	2312	2592	4634	4329	4363	157.9733627	132.8966157	138.9083875	259.7703343	221.6052833	242.5133828	4340.039576	2576.71427	0.752161341	6.94E-09	1.81E-07	Ila17G010210	GWHBIST00000017	19223232	19261026	+	1601	protein_coding	- && sp|Q42966|NRL4B_TOBAC Bifunctional nitrilase/nitrile hydratase NIT4B OS=Nicotiana tabacum OX=4097 GN=NIT4B PE=2 SV=1 && PF00795:Carbon-nitrogen hydrolase	CN_hydrolase
Ila08G014110	3140	2827	3603	4226	3535	3528	286.2789807	254.8105998	302.777309	371.4741575	283.7576197	307.4996763	3680.96157	3226.488113	0.189983969	0.201831266	0.367971502	Ila08G014110	GWHBIST00000008	34284472	34287600	-	1021	protein_coding	- && sp|Q5J907|TCTP_ELAGV Translationally-controlled tumor protein homolog OS=Elaeis guineensis var. tenera OX=51953 GN=TCTP PE=2 SV=1 && PF00838:Translationally controlled tumour protein	-
Ila01G002840	4886	4966	4652	2803	1568	1971	187.1684937	188.0692815	164.2548633	103.5241516	52.88392019	72.18088112	2080.136776	4909.329447	-1.23900098	4.13E-08	8.88E-07	Ila01G002840	GWHBIST00000001	3033479	3037854	+	2430	protein_coding	- && sp|Q8H1H9|AMO_ARATH Primary amine oxidase OS=Arabidopsis thaliana OX=3702 GN=At1g62810 PE=2 SV=1 && PF01179:Copper amine oxidase, enzyme domain|PF02728:Copper amine oxidase, N3 domain|PF02727:Copper amine oxidase, N2 domain	-
Ila06G010020	3011	3759	4958	2744	3586	2745	116.3964753	143.6591416	176.6586245	102.2709947	122.049965	101.4443105	2937.59314	3938.077126	-0.42287589	0.018071702	0.060734106	Ila06G010020	GWHBIST00000006	11024741	11032207	+	2408	protein_coding	- && sp|Q940S0|TMN2_ARATH Transmembrane 9 superfamily member 2 OS=Arabidopsis thaliana OX=3702 GN=TMN2 PE=2 SV=1 && PF02990:Endomembrane protein 70	-
Ila14G027770	3632	3679	3332	3403	3184	3539	291.4562729	291.8698416	246.4516943	263.286636	224.9566968	271.4966042	3300.29929	3604.542791	-0.127236508	0.355319999	0.538660007	Ila14G027770	GWHBIST00000014	56449480	56452809	+	1160	protein_coding	- && - && -	-
Ila09G000420	3637	3302	2724	3692	3420	3988	72.68241902	65.23715431	50.17558258	71.13561063	60.17422122	76.18991587	3619.490471	3281.009408	0.141688971	0.416298403	0.596841097	Ila09G000420	GWHBIST00000009	479072	492070	-	4658	protein_coding	- && sp|B9HQZ6|SYAP_POPTR Alanine--tRNA ligase, chloroplastic/mitochondrial OS=Populus trichocarpa OX=3694 GN=POPTRDRAFT_821063 PE=3 SV=1 && PF01411:tRNA synthetases class II (A)	-
Ila19G004180	3186	2511	1934	4314	4285	4525	101.4617882	79.05608822	56.76915882	132.4573863	120.1450458	137.7626844	4272.973479	2597.366327	0.718307562	0.000480535	0.003113208	Ila19G004180	GWHBIST00000019	6997042	6999964	-	2923	protein_coding	- && sp|Q9SF38|PP222_ARATH Pentatricopeptide repeat-containing protein At3g09650, chloroplastic OS=Arabidopsis thaliana OX=3702 GN=HCF152 PE=2 SV=1 && PF13041:PPR repeat family	-
Ila14G027120	2767	2990	2581	3832	4070	4501	121.6672963	129.9773727	104.6048813	162.4536592	157.5641488	189.2038562	4036.994058	2824.265775	0.515462739	0.000276818	0.001936226	Ila14G027120	GWHBIST00000014	55823941	55828145	+	2117	protein_coding	- && - && PF01852:START domain	START
Ila18G000850	2976	2814	2519	3165	4201	5041	549.6521697	513.8199712	428.82731	563.5961707	683.1341581	890.0778418	4032.983567	2816.546307	0.517983611	0.006910344	0.028339255	Ila18G000850	GWHBIST00000018	960717	964294	+	504	protein_coding	- && sp|O04616|CUT1A_ARATH Protein CURVATURE THYLAKOID 1A, chloroplastic OS=Arabidopsis thaliana OX=3702 GN=CURT1A PE=1 SV=1 && PF14159:CAAD domains of cyanobacterial aminoacyl-tRNA synthetase	-
Ila06G002100	3436	3681	2913	3247	4143	3237	91.724798	97.14742506	71.67593087	83.57092266	97.37485912	82.6099921	3441.556175	3402.282161	0.016730654	0.915317236	0.954764531	Ila06G002100	GWHBIST00000006	2124449	2133199	+	3487	protein_coding	- && sp|P22180|PMA1_SOLLC Plasma membrane ATPase 1 OS=Solanum lycopersicum OX=4081 GN=LHA1 PE=2 SV=1 && PF00702:haloacid dehalogenase-like hydrolase|PF00690:Cation transporter/ATPase, N-terminus|PF00122:E1-E2 ATPase	E1-E2_ATPase
Ila18G000680	3085	3072	2914	3324	4856	3351	148.1026794	145.8011086	128.9426356	153.8537414	205.2507371	153.7936653	3724.254204	3070.370969	0.27871582	0.077531435	0.183366115	Ila18G000680	GWHBIST00000018	784833	786771	-	1939	protein_coding	- && sp|Q9AR73|HQGT_RAUSE Hydroquinone glucosyltransferase OS=Rauvolfia serpentina OX=4060 GN=AS PE=1 SV=1 && PF00201:UDP-glucoronosyl and UDP-glucosyl transferase	UDPGT
Ila09G010190	3154	3030	2434	3195	3908	4855	234.1260342	222.3629955	166.5358899	228.6642029	255.4117513	344.5351424	3891.156174	2925.723867	0.411473882	0.038832148	0.109099845	Ila09G010190	GWHBIST00000009	22488610	22492733	-	1254	protein_coding	- && sp|Q9ZVL6|U603_ARATH UPF0603 protein At1g54780, chloroplastic OS=Arabidopsis thaliana OX=3702 GN=At1g54780 PE=1 SV=1 && PF04536:TPM domain	-
Ila05G004270	1598	1522	2204	4160	7081	3997	61.290414	57.7114917	77.91599455	153.8326105	239.1160206	146.5568765	4903.385509	1789.721078	1.454012801	1.71E-11	8.15E-10	Ila05G004270	GWHBIST00000005	17041677	17045343	-	2427	protein_coding	- && sp|O80763|NRX1_ARATH Probable nucleoredoxin 1 OS=Arabidopsis thaliana OX=3702 GN=At1g60420 PE=1 SV=1 && PF03107:C1 domain|PF13905:Thioredoxin-like	-
Ila02G003420	3565	4374	5406	2445	2624	2095	134.3532378	162.9668418	187.7862947	88.83963507	87.0664293	75.47948054	2325.239195	4487.08519	-0.948448668	2.90E-09	8.27E-08	Ila02G003420	GWHBIST00000002	11584270	11588267	+	2470	protein_coding	- && sp|O04130|SERA2_ARATH D-3-phosphoglycerate dehydrogenase 2, chloroplastic OS=Arabidopsis thaliana OX=3702 GN=PGDH2 PE=1 SV=2 && PF01842:ACT domain|PF02826:D-isomer specific 2-hydroxyacid dehydrogenase, NAD binding domain|PF00389:D-isomer specific 2-hydroxyacid dehydrogenase, catalytic domain	2-Hacid_dh_C
Ila10G004960	3285	3821	3370	3361	3434	3168	99.89818562	114.8764832	94.46074706	98.54396639	91.94345463	92.10085712	3239.275253	3544.72817	-0.129968031	0.29900028	0.480351936	Ila10G004960	GWHBIST00000010	5508529	5517653	+	3061	protein_coding	- && sp|P37116|NCPR_VIGRR NADPH--cytochrome P450 reductase OS=Vigna radiata var. radiata OX=3916 PE=1 SV=1 && PF00175:Oxidoreductase NAD-binding domain|PF00667:FAD binding domain|PF00258:Flavodoxin	NAD_binding_1
Ila06G009470	3190	3251	3824	3537	3314	3257	338.2063235	340.7531486	373.6871572	361.5475306	309.3441052	330.1148576	3291.256963	3461.047027	-0.072727766	0.544541882	0.706118755	Ila06G009470	GWHBIST00000006	10212107	10212984	-	878	protein_coding	- && - && -	-
Ila14G012940	3138	2959	2397	3298	4549	4017	123.4592844	115.0926656	86.92367882	125.1009958	157.574179	151.0876339	3843.239355	2883.789759	0.414525302	0.016346063	0.056135068	Ila14G012940	GWHBIST00000014	29416685	29445883	+	2366	protein_coding	- && sp|Q0DIV0|HEMH2_ORYSJ Ferrochelatase-2, chloroplastic OS=Oryza sativa subsp. japonica OX=39947 GN=Os05g0361200 PE=2 SV=1 && PF00762:Ferrochelatase	-
Ila09G006720	3046	3156	3516	3690	3818	3129	49.58739618	50.79374886	52.75814535	57.91713507	54.72372218	48.69711589	3454.706269	3279.149082	0.075212868	0.526848234	0.6917736	Ila09G006720	GWHBIST00000009	9694904	9741218	+	5718	protein_coding	- && sp|Q0WL80|UGGG_ARATH UDP-glucose:glycoprotein glucosyltransferase OS=Arabidopsis thaliana OX=3702 GN=UGGT PE=1 SV=1 && PF06427:UDP-glucose:Glycoprotein Glucosyltransferase|PF18402:Thioredoxin-like domain|PF18400:Thioredoxin-like domain|PF18401:Thioredoxin-like domain|PF18404:Glucosyltransferase 24|PF18403:Thioredoxin-like domain	-
Ila15G010420	2863	3401	4359	3039	3462	3210	75.34802001	88.48894064	105.7393445	77.11173877	80.21874442	80.76288069	3153.64447	3570.648969	-0.179272228	0.237904731	0.41212529	Ila15G010420	GWHBIST00000015	15228566	15240657	-	3537	protein_coding	- && sp|Q9SV21|COPB1_ARATH Coatomer subunit beta-1 OS=Arabidopsis thaliana OX=3702 GN=At4g31480 PE=3 SV=2 && PF01602:Adaptin N terminal region|PF07718:Coatomer beta C-terminal region|PF14806:Coatomer beta subunit appendage platform	-
Ila12G002390	2953	2777	2270	3573	3661	5054	214.5852535	199.5005851	152.0412852	250.3276038	234.2256515	351.0976612	4008.707825	2715.773042	0.561818243	0.005136548	0.022376697	Ila12G002390	GWHBIST00000012	16442299	16452644	+	1281	protein_coding	- && - && -	-
Ila02G006130	4321	3998	4257	2765	2845	2026	144.2703393	131.9676382	131.0073571	89.00762686	83.63216849	64.6678616	2477.621158	4251.863047	-0.77907866	3.69E-07	6.31E-06	Ila02G006130	GWHBIST00000002	15406338	15412374	+	2788	protein_coding	- && sp|Q6R3K4|YSL8_ARATH Probable metal-nicotianamine transporter YSL8 OS=Arabidopsis thaliana OX=3702 GN=YSL8 PE=1 SV=2 && PF03169:OPT oligopeptide transporter protein	OPT
Ila05G002490	3591	3612	2745	2888	3252	4114	435.2509637	432.8166362	306.6662153	337.4899344	347.0349167	476.699719	3339.70277	3378.555602	-0.0166399	0.932880735	0.965484092	Ila05G002490	GWHBIST00000005	14314798	14317156	-	768	protein_coding	- && sp|P13869|CB12_PETHY Chlorophyll a-b binding protein, chloroplastic OS=Petunia hybrida OX=4102 PE=2 SV=1 && PF00504:Chlorophyll A-B binding protein	-
Ila06G012170	3670	3919	2727	2798	3281	3772	382.132611	403.4179039	261.7172955	280.8892038	300.7825023	375.4706494	3204.383112	3506.110941	-0.129752947	0.51118888	0.678396094	Ila06G012170	GWHBIST00000006	16431287	16443000	+	894	protein_coding	- && sp|Q680K2|GPPL1_ARATH Haloacid dehalogenase-like hydrolase domain-containing protein At4g39970 OS=Arabidopsis thaliana OX=3702 GN=At4g39970 PE=2 SV=1 && PF13419:Haloacid dehalogenase-like hydrolase	-
Ila18G005580	3482	3348	3648	3333	3648	2708	50.77962374	48.27008112	49.03597217	46.8635652	46.83967161	37.75423234	3142.24824	3539.714868	-0.171768343	0.193592318	0.357951407	Ila18G005580	GWHBIST00000018	7137311	7192742	+	6383	protein_coding	- && sp|Q9AUE0|CALS1_ARATH Callose synthase 1 OS=Arabidopsis thaliana OX=3702 GN=CALS1 PE=1 SV=2 && PF04652:Vta1 like|PF02364:1,3-beta-glucan synthase component|PF14288:1,3-beta-glucan synthase subunit FKS1, domain-1	DUF605
Ila16G021900	4550	5070	6041	1692	1411	1399	197.4556915	217.5194451	241.6386184	70.79423904	53.9117679	58.0406472	1467.935966	5274.334301	-1.845446416	1.98E-33	2.00E-30	Ila16G021900	GWHBIST00000016	48847412	48853746	-	2145	protein_coding	- && sp|O24146|4CL2_TOBAC 4-coumarate--CoA ligase 2 OS=Nicotiana tabacum OX=4097 GN=4CL2 PE=1 SV=1 && PF00501:AMP-binding enzyme|PF13193:AMP-binding enzyme C-terminal domain	AMP-binding
Ila17G009420	2905	2709	2774	3735	3948	4033	135.2077847	124.6511912	119.0039196	167.6044195	161.7822998	179.4485919	3810.988323	2837.542991	0.425561802	0.000219042	0.001583698	Ila17G009420	GWHBIST00000017	14469658	14483665	+	2000	protein_coding	- && sp|E0CSI1|MTBC1_VITVI Probable bifunctional methylthioribulose-1-phosphate dehydratase/enolase-phosphatase E1 1 OS=Vitis vinifera OX=29760 GN=VIT_19s0014g02480 PE=3 SV=2 && PF00596:Class II Aldolase and Adducin N-terminal domain	Aldolase_II
Ila08G002990	3138	3127	3101	3767	3303	3645	70.38666669	69.34213487	64.11187439	81.46524711	65.22954263	78.16120829	3494.483176	3167.884419	0.141492346	0.287030864	0.467605269	Ila08G002990	GWHBIST00000008	4734546	4744329	-	4150	protein_coding	- && sp|Q8LPQ5|BTS_ARATH Zinc finger protein BRUTUS OS=Arabidopsis thaliana OX=3702 GN=BTS PE=1 SV=1 && PF05495:CHY zinc finger|PF01814:Hemerythrin HHE cation binding domain|PF14599:Zinc-ribbon	zf-CHY
Ila07G010380	3380	3631	4439	2749	3074	2752	288.9178516	306.8426982	349.7373942	226.5539903	231.344852	224.8859786	2784.467272	3855.83862	-0.46972376	0.000110657	0.000888125	Ila07G010380	GWHBIST00000007	25045368	25050322	-	1089	protein_coding	- && sp|P51823|ARF2_ORYSJ ADP-ribosylation factor 2 OS=Oryza sativa subsp. japonica OX=39947 GN=ARF PE=2 SV=2 && PF00025:ADP-ribosylation factor family	Arf
Ila06G014460	3005	3479	4072	2952	3380	3134	101.2026754	115.8334026	126.4021716	95.85243945	100.2218737	100.9026987	3073.910739	3554.815631	-0.209782765	0.100584127	0.222287853	Ila06G014460	GWHBIST00000006	27365176	27368325	+	2764	protein_coding	- && sp|P53492|ACT7_ARATH Actin-7 OS=Arabidopsis thaliana OX=3702 GN=ACT7 PE=1 SV=1 && -	-
Ila19G003000	3354	3598	4000	3087	3264	2709	409.7261125	434.533848	450.3911256	363.5854656	351.05813	316.3704136	2942.049111	3694.350458	-0.328528357	0.00466939	0.020709477	Ila19G003000	GWHBIST00000019	4877322	4880660	+	762	protein_coding	- && sp|O80934|Y2766_ARATH Uncharacterized protein At2g37660, chloroplastic OS=Arabidopsis thaliana OX=3702 GN=At2g37660 PE=1 SV=2 && PF13460:NAD(P)H-binding	-
Ila04G003800	2555	2419	2773	4412	4014	3767	176.1743558	164.8995702	176.2385479	293.3098116	243.6842476	248.3154148	3970.132357	2615.273417	0.602135394	1.73E-06	2.45E-05	Ila04G003800	GWHBIST00000004	14849166	14850762	-	1350	protein_coding	- && sp|O49169|EF1A_MANES Elongation factor 1-alpha OS=Manihot esculenta OX=3983 GN=EF1 PE=3 SV=1 && PF00009:Elongation factor Tu GTP binding domain|PF03144:Elongation factor Tu domain 2|PF03143:Elongation factor Tu C-terminal domain	GTP_EFTU
Ila17G026020	3178	3176	3202	3352	3550	3282	74.89319417	73.99473547	69.55190612	76.16084784	73.65718444	73.94065776	3309.842947	3231.166349	0.034754083	0.733101586	0.84518827	Ila17G026020	GWHBIST00000017	48473670	48487305	-	3950	protein_coding	- && sp|Q9SMX9|SPL1_ARATH Squamosa promoter-binding-like protein 1 OS=Arabidopsis thaliana OX=3702 GN=SPL1 PE=1 SV=2 && PF03110:SBP domain	SBP
Ila01G011210	3102	2733	2576	3434	3807	4064	142.5943514	124.2029834	109.14545	152.1949068	154.0783807	178.5954952	3676.881485	2850.868347	0.367169036	0.012729647	0.04622746	Ila01G011210	GWHBIST00000001	18926362	18931677	-	2025	protein_coding	- && sp|O49931|TIC55_PEA Protein TIC 55, chloroplastic OS=Pisum sativum OX=3888 GN=TIC55 PE=1 SV=1 && PF00355:Rieske [2Fe-2S] domain|PF08417:Pheophorbide a oxygenase	-
Ila05G007530	4340	3637	3816	3444	1946	2531	155.9823725	129.2292907	126.4134857	119.3406048	61.57819127	86.96293918	2598.204005	3992.381599	-0.619847261	0.006578793	0.027225142	Ila05G007530	GWHBIST00000005	22626908	22629497	-	2590	protein_coding	- && - && PF07676:WD40-like Beta Propeller Repeat	PD40
Ila12G002170	3061	3211	3341	3255	3746	3057	87.83508791	91.09129659	88.36503113	90.05234015	94.63913973	83.86030194	3262.415442	3247.104286	0.006872291	0.949304547	0.974435545	Ila12G002170	GWHBIST00000012	15683435	15698811	+	3244	protein_coding	- && sp|Q5RJH2|MCTP2_MOUSE Multiple C2 and transmembrane domain-containing protein 2 OS=Mus musculus OX=10090 GN=Mctp2 PE=2 SV=1 && PF00168:C2 domain	C2
Ila09G014610	2312	2384	1913	4127	4140	4791	80.0354855	81.58923717	61.03921961	137.742678	126.1808345	158.5539979	4254.267342	2242.183109	0.924107497	1.45E-08	3.50E-07	Ila09G014610	GWHBIST00000009	31962017	31968219	-	2689	protein_coding	- && sp|O22056|SIGB_ARATH RNA polymerase sigma factor sigB OS=Arabidopsis thaliana OX=3702 GN=SIGB PE=2 SV=2 && PF04542:Sigma-70 region 2|PF04545:Sigma-70, region 4|PF04539:Sigma-70 region 3	Sigma70_r4
Ila02G008970	3328	3093	2227	2966	3645	4397	323.7106114	297.4304348	199.6609274	278.1532026	312.1543931	408.8710452	3580.844482	2941.580312	0.283795843	0.190222792	0.353478311	Ila02G008970	GWHBIST00000002	18840482	18844455	-	957	protein_coding	- && sp|Q94K71|CBBY_ARATH CBBY-like protein OS=Arabidopsis thaliana OX=3702 GN=CBBY PE=1 SV=1 && PF13419:Haloacid dehalogenase-like hydrolase	-
Ila19G004250	2651	2725	2739	3859	3937	3712	139.655722	141.9212347	132.9965231	196.0031652	182.6050238	186.9447385	3742.313659	2743.269322	0.448049072	1.56E-05	0.000164503	Ila19G004250	GWHBIST00000019	7275343	7278979	-	1767	protein_coding	- && sp|Q9SF40|RL4A_ARATH 60S ribosomal protein L4-1 OS=Arabidopsis thaliana OX=3702 GN=RPL4A PE=1 SV=1 && PF00573:Ribosomal protein L4/L1 family|PF14374:60S ribosomal protein L4 C-terminal domain	-
Ila01G002950	1620	1595	1647	4240	6217	4282	64.88800876	63.15998053	60.80541825	163.7399256	219.2444458	163.9654585	4760.077193	1643.581822	1.534288738	2.46E-23	7.50E-21	Ila01G002950	GWHBIST00000001	3112659	3117956	+	2324	protein_coding	- && sp|Q5XEP2|HSOP2_ARATH Hsp70-Hsp90 organizing protein 2 OS=Arabidopsis thaliana OX=3702 GN=HOP2 PE=1 SV=1 && PF13414:TPR repeat|PF07719:Tetratricopeptide repeat|PF17830:STI1 domain	TPR_2
Ila11G009690	2603	2537	2027	3654	4150	4604	55.84317137	53.80817233	40.08195566	75.57945373	78.38668583	94.42510869	4036.04798	2432.979361	0.730341351	1.94E-05	0.00020079	Ila11G009690	GWHBIST00000011	27130474	27150533	-	4339	protein_coding	- && sp|Q8RXK8|SYIM_ARATH Isoleucine--tRNA ligase, chloroplastic/mitochondrial OS=Arabidopsis thaliana OX=3702 GN=OVA2 PE=2 SV=1 && PF00133:tRNA synthetases class I (I, L, M and V)|PF08264:Anticodon-binding domain of tRNA	-
Ila17G017590	3175	3363	3621	3109	3664	2577	92.50355499	96.86645999	97.23944401	87.33226326	93.98714532	71.77701357	3028.218781	3429.191686	-0.179315822	0.195853955	0.360503744	Ila17G017590	GWHBIST00000017	39569903	39577434	-	3195	protein_coding	- && sp|Q9XES1|ECA4_ARATH Calcium-transporting ATPase 4, endoplasmic reticulum-type OS=Arabidopsis thaliana OX=3702 GN=ECA4 PE=2 SV=2 && PF13246:Cation transport ATPase (P-type)|PF00122:E1-E2 ATPase|PF00702:haloacid dehalogenase-like hydrolase|PF00690:Cation transporter/ATPase, N-terminus|PF00689:Cation transporting ATPase, C-terminus	E1-E2_ATPase
Ila16G024740	1791	1461	1541	4473	5111	5102	116.9947241	94.35236172	92.78389054	281.714298	293.9509533	318.6158807	4772.20743	1622.952843	1.556190593	1.53E-28	8.08E-26	Ila16G024740	GWHBIST00000016	52769385	52783698	+	1425	protein_coding	- && sp|O65282|CH20_ARATH 20 kDa chaperonin, chloroplastic OS=Arabidopsis thaliana OX=3702 GN=CPN20 PE=1 SV=2 && PF00166:Chaperonin 10 Kd subunit	-
Ila19G007160	3175	3246	3371	2907	3563	3192	46.49919103	46.99828936	45.50505762	41.04743265	45.94262337	44.6910772	3134.280236	3308.544641	-0.077961129	0.466716209	0.639648199	Ila19G007160	GWHBIST00000019	21583019	21596016	+	6356	protein_coding	- && sp|Q8LK56|DME_ARATH Transcriptional activator DEMETER OS=Arabidopsis thaliana OX=3702 GN=DME PE=1 SV=2 && PF15628:RRM in Demeter|PF15629:Permuted single zf-CXXC unit	-
Ila07G011130	2736	2726	2992	3879	3800	3317	127.4056991	125.4961727	128.4202762	174.1533533	155.7954102	147.6639583	3575.354102	2854.533901	0.324784185	0.005147463	0.022409729	Ila07G011130	GWHBIST00000007	25732231	25736611	+	1999	protein_coding	- && sp|Q9FNN5|NDUV1_ARATH NADH dehydrogenase [ubiquinone] flavoprotein 1, mitochondrial OS=Arabidopsis thaliana OX=3702 GN=At5g08530 PE=1 SV=1 && PF10589:NADH-ubiquinone oxidoreductase-F iron-sulfur binding region|PF01512:Respiratory-chain NADH dehydrogenase 51 Kd subunit|PF10531:SLBB domain	-
Ila02G005860	2345	2081	1870	4184	4158	4784	117.7385474	103.2951128	86.53995826	202.5381327	183.8055461	229.627168	4276.616116	2135.448942	1.002033641	3.88E-10	1.34E-08	Ila02G005860	GWHBIST00000002	15064521	15073606	-	1854	protein_coding	- && sp|Q9BRT8|CBWD1_HUMAN COBW domain-containing protein 1 OS=Homo sapiens OX=9606 GN=CBWD1 PE=1 SV=1 && PF02492:CobW/HypB/UreG, nucleotide-binding domain|PF07683:Cobalamin synthesis protein cobW C-terminal domain	-
Ila13G000390	3743	4065	3964	2540	2657	2371	99.97757555	107.3433615	97.59232578	65.41175327	62.4845474	60.54392887	2459.273258	3979.32562	-0.694272068	1.35E-10	5.15E-09	Ila13G000390	GWHBIST00000013	431908	442221	+	3485	protein_coding	- && sp|O22898|LACS1_ARATH Long chain acyl-CoA synthetase 1 OS=Arabidopsis thaliana OX=3702 GN=LACS1 PE=2 SV=1 && PF00501:AMP-binding enzyme	AMP-binding
Ila18G011510	3102	4053	5969	2385	2013	1756	154.910709	200.100475	274.7517552	114.833164	88.50783617	83.83404707	2004.578137	4395.956515	-1.1330061	3.53E-07	6.10E-06	Ila18G011510	GWHBIST00000018	29824441	29846497	-	1864	protein_coding	- && sp|Q66GM8|PAE10_ARATH Pectin acetylesterase 10 OS=Arabidopsis thaliana OX=3702 GN=PAE10 PE=2 SV=1 && PF03283:Pectinacetylesterase	-
Ila0G019890	2661	2834	3213	3804	3408	3354	173.0975006	182.254238	192.6441815	238.5754382	195.1838179	208.5764412	3442.168075	2936.617207	0.229007081	0.074382531	0.177896621	Ila0G019890	GWHBIST00000243	57282	60607	+	1431	protein_coding	- && sp|P50346|RLA0_SOYBN 60S acidic ribosomal protein P0 OS=Glycine max OX=3847 PE=2 SV=1 && PF00428:60s Acidic ribosomal protein|PF00466:Ribosomal protein L10|PF17777:Insertion domain in 60S ribosomal protein L10P	-
Ila20G009730	2769	2733	2418	3416	3520	4308	171.8372259	167.6740276	138.3088092	204.386148	192.3247873	255.5796459	3664.061436	2684.021685	0.449083597	0.005262993	0.022809908	Ila20G009730	GWHBIST00000020	12263890	12270253	-	1500	protein_coding	- && sp|Q7XAB8|THF1_SOLTU Protein THYLAKOID FORMATION1, chloroplastic OS=Solanum tuberosum OX=4113 GN=THF1 PE=2 SV=1 && PF11264:Thylakoid formation protein	-
Ila15G011660	744	378	507	5007	6129	6353	81.47785104	40.9251517	51.17688385	528.668606	590.9551912	665.1226817	5681.013743	552.5208946	3.362321314	8.04E-46	3.73E-42	Ila15G011660	GWHBIST00000015	20155834	20156683	+	850	protein_coding	- && sp|O82013|HSP21_SOLPE 17.3 kDa class II heat shock protein OS=Solanum peruvianum OX=4082 PE=2 SV=1 && PF00011:Hsp20/alpha crystallin family	-
Ila05G001130	2891	3111	3672	3576	3074	2783	112.505168	119.689557	131.7122904	134.1717828	105.323806	103.5365905	3072.744274	3259.732659	-0.08536274	0.569676232	0.725973222	Ila05G001130	GWHBIST00000005	10043329	10045914	-	2392	protein_coding	- && sp|Q42806|KPYC_SOYBN Pyruvate kinase, cytosolic isozyme OS=Glycine max OX=3847 PE=2 SV=1 && PF00224:Pyruvate kinase, barrel domain|PF02887:Pyruvate kinase, alpha/beta domain	PK
Ila19G012070	2949	2771	2873	3506	3552	3432	47.74941114	44.35694639	42.87736834	54.73239579	50.63659623	53.12473774	3412.202325	2906.056813	0.231658158	0.034514943	0.09994979	Ila19G012070	GWHBIST00000019	28951028	28966496	-	5749	protein_coding	- && sp|Q8RXS6|INO80_ARATH Chromatin-remodeling ATPase INO80 OS=Arabidopsis thaliana OX=3702 GN=INO80 PE=2 SV=2 && PF00176:SNF2 family N-terminal domain|PF00271:Helicase conserved C-terminal domain|PF13892:DNA-binding domain	SNF2_N
Ila17G009490	2831	3233	2690	3304	3391	3609	70.8216035	79.95828277	62.02651984	79.69025644	74.68819711	86.3115748	3353.884855	2965.34172	0.177679586	0.207884215	0.375435104	Ila17G009490	GWHBIST00000017	14634863	14656066	-	3721	protein_coding	- && sp|Q9LJR3|SPA3_ARATH Protein SPA1-RELATED 3 OS=Arabidopsis thaliana OX=3702 GN=SPA3 PE=1 SV=1 && -	-
Ila09G016470	2990	3208	4057	3191	2932	2640	120.4882689	127.8026337	150.6877098	123.9765881	104.0245492	101.7030028	2852.113214	3451.373623	-0.275290138	0.06140559	0.154125505	Ila09G016470	GWHBIST00000009	34408181	34414254	+	2310	protein_coding	- && sp|P11043|AROA_PETHY 3-phosphoshikimate 1-carboxyvinyltransferase, chloroplastic OS=Petunia hybrida OX=4102 GN=EPSPS PE=1 SV=1 && PF00275:EPSP synthase (3-phosphoshikimate 1-carboxyvinyltransferase)	EPSP_synthase
Ila19G007150	2572	2028	1846	4146	3653	4737	229.5473123	178.9373767	151.8560828	356.7548164	287.0444936	404.1670504	4093.191191	2188.602609	0.903280566	3.64E-06	4.73E-05	Ila19G007150	GWHBIST00000019	21568382	21569424	+	1043	protein_coding	- && sp|Q69TY4|PR2E1_ORYSJ Peroxiredoxin-2E-1, chloroplastic OS=Oryza sativa subsp. japonica OX=39947 GN=PRXIIE-1 PE=2 SV=1 && PF08534:Redoxin	-
Ila12G009770	2085	2065	1659	4009	4295	4857	124.0158727	121.4292011	90.95296238	229.9040226	224.9223864	276.1821398	4284.174758	1971.506322	1.11986293	1.68E-11	8.05E-10	Ila12G009770	GWHBIST00000012	28774762	28781230	-	1565	protein_coding	- && sp|Q8H0W0|LPA3_ARATH Protein LPA3 OS=Arabidopsis thaliana OX=3702 GN=LPA3 PE=1 SV=1 && PF09353:Domain of unknown function (DUF1995)	-
Ila01G006760	3172	2769	2499	3166	3586	3734	118.1078398	101.929612	85.76518962	113.6568872	117.5585262	132.9156543	3409.00881	2862.935879	0.251965748	0.105595144	0.230332513	Ila01G006760	GWHBIST00000001	8096671	8106199	-	2500	protein_coding	- && - && PF07082:Protein of unknown function (DUF1350)	-
Ila14G019650	3167	3320	3188	2749	3509	2991	49.60527817	51.41025728	46.02538045	41.51393159	48.3906543	44.78705554	2997.621232	3272.459721	-0.126389531	0.291668438	0.472831999	Ila14G019650	GWHBIST00000014	46771013	46784003	+	5943	protein_coding	- && sp|Q8QG78|NCOR1_XENLA Nuclear receptor corepressor 1 OS=Xenopus laevis OX=8355 GN=ncor1 PE=1 SV=1 && PF00249:Myb-like DNA-binding domain	Myb_DNA-binding
Ila01G000380	2575	2575	3296	3874	4093	2485	92.97793075	91.92036584	109.6955714	134.865715	130.1195906	85.77985517	3386.333636	2844.048486	0.25176258	0.19107395	0.354547991	Ila01G000380	GWHBIST00000001	431758	438045	-	2578	protein_coding	- && sp|Q03685|BIP5_TOBAC Luminal-binding protein 5 OS=Nicotiana tabacum OX=4097 GN=BIP5 PE=2 SV=1 && PF00012:Hsp70 protein	HSP70
Ila04G011170	3090	2936	2924	3229	3468	3251	70.20662108	65.94889317	61.23450465	70.73379132	69.37403918	70.61432859	3233.006306	3028.457845	0.094377767	0.391474462	0.573267547	Ila04G011170	GWHBIST00000004	23289076	23314853	-	4097	protein_coding	- && sp|Q9SMV6|XPO1A_ARATH Protein EXPORTIN 1A OS=Arabidopsis thaliana OX=3702 GN=XPO1 PE=1 SV=1 && PF18787:CRM1 / Exportin repeat 3|PF18777:Chromosome region maintenance or exportin repeat|PF03810:Importin-beta N-terminal domain|PF18784:CRM1 / Exportin repeat 2|PF08767:CRM1 C terminal|PF08389:Exportin 1-like protein	-
Ila13G006850	2566	2672	2461	3947	3690	3500	81.18943888	83.58170174	71.77178541	120.4063285	102.7939499	105.8686084	3625.432893	2606.051617	0.476324778	0.000216261	0.001567012	Ila13G006850	GWHBIST00000013	10958975	10963894	+	2942	protein_coding	- && sp|Q9LJE5|ECT2_ARATH YTH domain-containing protein ECT2 OS=Arabidopsis thaliana OX=3702 GN=ECT2 PE=1 SV=1 && PF04146:YT521-B-like domain	YTH
Ila17G024220	3238	3460	2703	2884	2967	3575	154.7296161	163.4573938	119.0534261	132.8712924	124.8281259	163.3160706	3071.265819	3189.625183	-0.054519014	0.752379062	0.856979177	Ila17G024220	GWHBIST00000017	46914497	46919909	+	1948	protein_coding	- && - && -	-
Ila20G000280	3236	4256	4891	2985	1848	1581	160.2271913	208.3344996	223.2156386	142.4988442	80.56157979	74.83691034	2097.272425	4166.261767	-0.990363581	7.38E-05	0.000627501	Ila20G000280	GWHBIST00000020	313207	317614	+	1880	protein_coding	- && sp|Q42962|PGKY_TOBAC Phosphoglycerate kinase, cytosolic OS=Nicotiana tabacum OX=4097 PE=2 SV=1 && PF00162:Phosphoglycerate kinase	-
Ila18G006720	3049	3222	3661	2782	3240	2816	68.35741573	71.41437094	75.65318015	60.13462908	63.95456094	60.35553921	2867.833769	3349.529136	-0.224003924	0.037482478	0.106274166	Ila18G006720	GWHBIST00000018	9593340	9610871	+	4152	protein_coding	- && sp|Q8L611|SC31B_ARATH Protein transport protein SEC31 homolog B OS=Arabidopsis thaliana OX=3702 GN=SEC31B PE=1 SV=1 && PF12931:Sec23-binding domain of Sec16	-
Ila11G001890	3062	2852	3039	3502	3295	2996	63.96546486	58.90087722	58.51541946	70.53356179	60.60299579	59.83267992	3186.683829	3026.698614	0.074288594	0.548711072	0.709630411	Ila11G001890	GWHBIST00000011	11292483	11340533	-	4456	protein_coding	- && sp|F4JLM5|SYIC_ARATH Isoleucine--tRNA ligase, cytoplasmic OS=Arabidopsis thaliana OX=3702 GN=At4g10320 PE=2 SV=1 && PF08264:Anticodon-binding domain of tRNA|PF00133:tRNA synthetases class I (I, L, M and V)	-
Ila18G009350	3286	2851	2046	3172	3265	4067	107.5532463	92.25396674	61.72496353	100.0987012	94.08869609	127.2583854	3423.479287	2785.384154	0.297666555	0.171464287	0.328248218	Ila18G009350	GWHBIST00000018	19597710	19671154	-	2844	protein_coding	- && sp|Q9ZVN2|Y1457_ARATH Acyltransferase-like protein At1g54570, chloroplastic OS=Arabidopsis thaliana OX=3702 GN=At1g54570 PE=1 SV=1 && PF12146:Serine aminopeptidase, S33|PF03982:Diacylglycerol acyltransferase	-
Ila20G005600	2410	2262	1905	3725	3921	4460	179.9020637	166.9335276	131.0730276	268.0925091	257.6998972	318.2806482	3941.639216	2231.730233	0.820747717	5.52E-07	8.99E-06	Ila20G005600	GWHBIST00000020	5659466	5664133	-	1247	protein_coding	- && sp|Q9SYL9|RK13_ARATH 50S ribosomal protein L13, chloroplastic OS=Arabidopsis thaliana OX=3702 GN=RPL13 PE=2 SV=1 && PF00572:Ribosomal protein L13	-
Ila14G025250	3311	2921	2548	3281	3358	3259	187.1333265	163.2132383	132.7365817	178.787638	167.0978835	176.0891471	3219.388636	2979.516987	0.111813225	0.467079012	0.639958281	Ila14G025250	GWHBIST00000014	53901303	53904583	+	1647	protein_coding	- && sp|Q9FJ95|DHSO_ARATH Sorbitol dehydrogenase OS=Arabidopsis thaliana OX=3702 GN=SDH PE=1 SV=1 && PF00107:Zinc-binding dehydrogenase|PF08240:Alcohol dehydrogenase GroES-like domain	ADH_N
Ila15G010620	4553	4168	3289	1758	2355	2527	116.0837351	105.0590093	77.29240934	43.21473891	52.86435466	61.59355025	2155.750836	4080.30091	-0.920394597	2.77E-06	3.71E-05	Ila15G010620	GWHBIST00000015	15795382	15803552	-	3651	protein_coding	- && sp|Q03194|PMA4_NICPL Plasma membrane ATPase 4 OS=Nicotiana plumbaginifolia OX=4092 GN=PMA4 PE=2 SV=1 && PF00122:E1-E2 ATPase|PF00690:Cation transporter/ATPase, N-terminus|PF00702:haloacid dehalogenase-like hydrolase	E1-E2_ATPase
Ila17G017000	3110	3436	3776	2747	3118	2371	91.64237152	100.096975	102.5574383	78.0429881	80.89288813	66.79189367	2670.330383	3481.492979	-0.382649425	0.002956182	0.014165114	Ila17G017000	GWHBIST00000017	38672158	38682319	-	3159	protein_coding	- && sp|Q9SCV4|BGAL8_ARATH Beta-galactosidase 8 OS=Arabidopsis thaliana OX=3702 GN=BGAL8 PE=2 SV=2 && PF17834:Beta-sandwich domain in beta galactosidase|PF01301:Glycosyl hydrolases family 35|PF02140:Galactose binding lectin domain	-
Ila14G018150	3330	3442	4174	2153	3198	2236	59.85271822	61.16209863	69.14986529	37.3098046	50.60767724	38.42091618	2450.257104	3688.129426	-0.589825762	0.000215371	0.001561542	Ila14G018150	GWHBIST00000014	43273458	43283770	+	5179	protein_coding	- && sp|Q2PCF1|PDR2_NICPL Pleiotropic drug resistance protein 2 OS=Nicotiana plumbaginifolia OX=4092 GN=PDR2 PE=2 SV=1 && PF01061:ABC-2 type transporter|PF00005:ABC transporter|PF14510:ABC-transporter N-terminal|PF08370:Plant PDR ABC transporter associated	ABC2_membrane
Ila06G005190	1905	2293	8713	2337	1538	1723	130.102212	154.8194865	548.4747803	153.8819611	92.47925789	112.4944898	1831.665205	4253.808134	-1.215641972	0.075416867	0.179655544	Ila06G005190	GWHBIST00000006	4968213	4969941	-	1363	protein_coding	- && sp|Q8LER3|XTH7_ARATH Probable xyloglucan endotransglucosylase/hydrolase protein 7 OS=Arabidopsis thaliana OX=3702 GN=XTH7 PE=2 SV=2 && PF06955:Xyloglucan endo-transglycosylase (XET) C-terminus|PF00722:Glycosyl hydrolases family 16	-
Ila15G017080	2596	2677	2137	3359	3731	4006	69.72069152	71.07833347	52.90062078	86.97737596	88.22274106	102.8547174	3609.020833	2514.130202	0.521666008	0.001040128	0.006009832	Ila15G017080	GWHBIST00000015	45379183	45401360	-	3466	protein_coding	- && sp|Q0WVX5|SSY4_ARATH Probable starch synthase 4, chloroplastic/amyloplastic OS=Arabidopsis thaliana OX=3702 GN=SS4 PE=1 SV=1 && PF00534:Glycosyl transferases group 1|PF08323:Starch synthase catalytic domain	Glycos_transf_1
Ila04G011890	3463	3498	2841	2662	2777	3245	84.76405456	84.64686996	64.09582074	62.82125113	59.84576333	75.93293806	2828.367551	3325.493752	-0.233562461	0.15915486	0.311209626	Ila04G011890	GWHBIST00000004	24029434	24041447	-	3803	protein_coding	- && sp|Q9EQN5|SMBP2_RAT DNA-binding protein SMUBP-2 OS=Rattus norvegicus OX=10116 GN=Ighmbp2 PE=1 SV=1 && PF13087:AAA domain|PF13086:AAA domain	-
Ila14G000110	2864	3430	3922	2910	2862	2474	106.8533199	126.5147011	134.8720144	104.6760425	94.01192293	88.24111231	2680.868382	3440.582166	-0.360060687	0.01112375	0.041560812	Ila14G000110	GWHBIST00000014	186826	193369	+	2495	protein_coding	- && sp|Q9FMU6|MPCP3_ARATH Mitochondrial phosphate carrier protein 3, mitochondrial OS=Arabidopsis thaliana OX=3702 GN=MPT3 PE=1 SV=1 && PF00153:Mitochondrial carrier protein	Mito_carr
Ila14G010470	2540	2280	2711	4050	3746	3116	97.14013416	86.20484929	95.5638743	149.3342087	126.1336768	113.9249125	3549.268617	2542.220762	0.481382301	0.000816534	0.004889713	Ila14G010470	GWHBIST00000014	19168382	19178745	+	2434	protein_coding	- && sp|O82663|SDHA1_ARATH Succinate dehydrogenase [ubiquinone] flavoprotein subunit 1, mitochondrial OS=Arabidopsis thaliana OX=3702 GN=SDH1-1 PE=1 SV=1 && PF02910:Fumarate reductase flavoprotein C-term|PF00890:FAD binding domain	-
novel.965	2427	2510	1665	3253	4279	4305	147.756926	151.0718891	93.43112046	190.9419852	229.3605163	250.557553	3841.225461	2246.010687	0.774364827	0.00017394	0.001306072	-	GWHBIST00000018	732124	737167	+	1529	-	- && Q9M158.2 RecName: Full=Rhodanese-like domain-containing protein 4, chloroplastic; AltName: Full=Protein THYLAKOID RHODANESE-LIKE; AltName: Full=Sulfurtransferase 4; Short=AtStr4; Flags: Precursor && -	-
Ila15G003680	3206	3101	2443	2611	3352	3701	169.2765355	161.8701905	118.8929107	132.9166587	155.8244326	186.8136481	3139.664242	2971.210752	0.079661067	0.672008576	0.803603035	Ila15G003680	GWHBIST00000015	4602801	4609683	+	1763	protein_coding	- && sp|Q8H112|PGL1A_ARATH PGR5-like protein 1A, chloroplastic OS=Arabidopsis thaliana OX=3702 GN=PGRL1A PE=1 SV=1 && -	-
Ila08G005950	3279	3638	4795	2141	2528	2032	98.84385643	108.4183583	133.228189	62.22490344	67.09399228	58.55827037	2172.609493	3937.427303	-0.857850555	1.43E-08	3.44E-07	Ila08G005950	GWHBIST00000008	17100320	17111266	+	3088	protein_coding	- && sp|M4ISH1|CCL6_HUMLU Probable CoA ligase CCL6 OS=Humulus lupulus OX=3486 GN=CCL6 PE=2 SV=1 && PF00501:AMP-binding enzyme|PF13193:AMP-binding enzyme C-terminal domain	AMP-binding
Ila08G001150	3449	4061	2632	2738	2674	2779	173.1685501	201.5768636	121.8038343	132.5404894	118.2049135	133.3891931	2667.003174	3447.485424	-0.370268141	0.053623214	0.139171868	Ila08G001150	GWHBIST00000008	1785081	1789987	-	1854	protein_coding	- && sp|Q88BD4|ALGC_PSESM Phosphomannomutase/phosphoglucomutase OS=Pseudomonas syringae pv. tomato (strain ATCC BAA-871 / DC3000) OX=223283 GN=algC PE=3 SV=1 && PF02880:Phosphoglucomutase/phosphomannomutase, alpha/beta/alpha domain III|PF02879:Phosphoglucomutase/phosphomannomutase, alpha/beta/alpha domain II|PF02878:Phosphoglucomutase/phosphomannomutase, alpha/beta/alpha domain I	PGM_PMM_II
Ila12G007790	2645	2566	2169	3561	3318	4019	170.7442048	163.7603717	129.0562663	221.6315425	188.5797162	248.0244952	3554.488465	2503.239392	0.505892458	0.002260842	0.011381273	Ila12G007790	GWHBIST00000012	26508533	26513162	+	1442	protein_coding	- && sp|P19683|ROC4_NICSY 31 kDa ribonucleoprotein, chloroplastic OS=Nicotiana sylvestris OX=4096 PE=1 SV=1 && PF00076:RNA recognition motif. (a.k.a. RRM, RBD, or RNP domain)	RRM_1
Ila16G023040	3305	3881	3999	2225	2901	1940	169.4108322	196.6732173	188.9384571	109.9610876	130.9229375	95.0665458	2284.660158	3774.47731	-0.724151877	2.92E-06	3.89E-05	Ila16G023040	GWHBIST00000016	50861428	50865067	+	1816	protein_coding	- && sp|A0A0S2II38|C7A94_KALSE Beta-amyrin 28-monooxygenase OS=Kalopanax septemlobus OX=228393 GN=CYP716A94 PE=1 SV=1 && PF00067:Cytochrome P450	p450
Ila04G010150	3660	3157	2408	2997	2701	3323	232.8747038	198.5855662	141.2202452	183.8515402	151.3087747	202.1286353	2943.6259	3137.524411	-0.091994089	0.651748799	0.788279141	Ila04G010150	GWHBIST00000004	22414372	22419255	+	1463	protein_coding	- && sp|P49599|P2C57_ARATH Protein phosphatase 2C 57 OS=Arabidopsis thaliana OX=3702 GN=PPH1 PE=1 SV=2 && PF00481:Protein phosphatase 2C	PP2C
Ila03G002820	2053	1727	1736	4065	4121	4540	131.164091	109.081276	102.2292027	250.3951161	231.8071989	277.2925041	4143.952301	1868.608245	1.149142905	4.52E-15	4.19E-13	Ila03G002820	GWHBIST00000003	4186781	4191092	+	1457	protein_coding	- && sp|O80934|Y2766_ARATH Uncharacterized protein At2g37660, chloroplastic OS=Arabidopsis thaliana OX=3702 GN=At2g37660 PE=1 SV=2 && PF13460:NAD(P)H-binding	-
Ila15G009140	2778	2463	2493	3588	3550	3364	70.34646766	61.66039932	58.18775217	87.59953229	79.14740983	81.43710245	3416.486751	2618.20778	0.383997758	0.002382684	0.01189137	Ila15G009140	GWHBIST00000015	11983592	12001552	+	3676	protein_coding	- && sp|Q0WV90|TPR1_ARATH Topless-related protein 1 OS=Arabidopsis thaliana OX=3702 GN=TPR1 PE=1 SV=3 && -	-
Ila15G017050	1802	2210	1770	3548	3763	5110	123.9774063	150.3183157	112.2432607	235.3480858	227.9398605	336.0972292	4050.272721	1958.490531	1.048308146	5.92E-08	1.25E-06	Ila15G017050	GWHBIST00000015	45344145	45345497	-	1353	protein_coding	- && sp|P27493|CB22_TOBAC Chlorophyll a-b binding protein 21, chloroplastic OS=Nicotiana tabacum OX=4097 GN=CAB21 PE=2 SV=1 && PF00504:Chlorophyll A-B binding protein	-
Ila16G024920	2919	3498	3463	2775	3019	2527	78.41811747	92.90390951	85.74998589	71.87611655	71.40748388	64.8998707	2701.343827	3335.711002	-0.304298649	0.013243145	0.047555955	Ila16G024920	GWHBIST00000016	53041029	53060094	-	3465	protein_coding	- && sp|Q7XZU2|SAC3_ARATH Phosphoinositide phosphatase SAC3 OS=Arabidopsis thaliana OX=3702 GN=SAC3 PE=2 SV=1 && PF02383:SacI homology domain	-
Ila17G020060	2006	1799	1860	4287	3928	4271	56.09222788	49.73187026	47.93844624	115.5751708	96.70335472	114.1714732	4069.68548	1916.879145	1.086179946	5.86E-16	6.02E-14	Ila17G020060	GWHBIST00000017	42306471	42318569	+	3329	protein_coding	- && sp|Q8LPR9|TI110_ARATH Protein TIC110, chloroplastic OS=Arabidopsis thaliana OX=3702 GN=TIC110 PE=1 SV=1 && PF16940:Chloroplast envelope transporter	-
Ila11G008450	3345	3138	3286	2636	2929	2790	54.04851961	50.12708935	48.93893212	41.06505288	41.6682588	43.09711083	2714.650416	3303.274711	-0.283074046	0.007902558	0.031592519	Ila11G008450	GWHBIST00000011	25911665	25918762	-	5761	protein_coding	- && sp|Q94KE2|TIC_ARATH Protein TIME FOR COFFEE OS=Arabidopsis thaliana OX=3702 GN=TIC PE=1 SV=2 && -	-
Ila14G015020	2878	3668	2888	2794	3335	2548	113.4217784	142.9113947	104.9064281	106.1625555	115.7177022	95.99781738	2811.712089	3195.25577	-0.184346115	0.246980772	0.423025798	Ila14G015020	GWHBIST00000014	34629220	34633201	+	2362	protein_coding	- && sp|O24381|TLC1_SOLTU Plastidic ATP/ADP-transporter OS=Solanum tuberosum OX=4113 PE=2 SV=2 && PF03219:TLC ATP/ADP transporter	-
Ila06G002930	2724	2515	2003	3392	3430	4024	97.6008304	89.08739634	66.1495063	117.1767781	108.2028823	137.8353629	3533.729732	2459.865802	0.522705896	0.00366589	0.01701381	Ila06G002930	GWHBIST00000006	2865170	2873186	+	2598	protein_coding	- && - && PF14234:Domain of unknown function (DUF4336)|PF07839:Plant calmodulin-binding domain	-
Ila09G014080	2485	2484	2504	3554	3660	3387	45.25026263	44.71756739	42.02698975	62.39523634	58.67783704	58.96118184	3446.484835	2526.842151	0.447835606	2.02E-05	0.000207951	Ila09G014080	GWHBIST00000009	31349362	31371186	+	5112	protein_coding	- && sp|F4J5S1|CLU_ARATH Clustered mitochondria protein OS=Arabidopsis thaliana OX=3702 GN=FMT PE=2 SV=1 && PF13236:Clustered mitochondria|PF15044:Mitochondrial function, CLU-N-term|PF13424:Tetratricopeptide repeat|PF12807:Translation initiation factor eIF3 subunit 135	-
Ila13G009970	2460	2698	2153	3391	3818	3501	56.12553583	60.85541187	45.27606465	74.5920396	76.69368712	76.36138139	3478.185026	2479.099846	0.488681567	0.000664793	0.00411295	Ila13G009970	GWHBIST00000013	21960924	21979673	+	4080	protein_coding	- && sp|O48963|PHOT1_ARATH Phototropin-1 OS=Arabidopsis thaliana OX=3702 GN=PHOT1 PE=1 SV=1 && PF13426:PAS domain|PF00069:Protein kinase domain	Pkinase
Ila17G025760	1568	1353	1230	4578	4736	4536	51.55748751	43.98203816	37.2777805	145.1311962	137.1057538	142.5853825	4503.784363	1408.072177	1.677672715	1.55E-29	9.69E-27	Ila17G025760	GWHBIST00000017	48219658	48224658	+	2831	protein_coding	- && sp|Q9SIC9|PP178_ARATH Pentatricopeptide repeat-containing protein At2g31400, chloroplastic OS=Arabidopsis thaliana OX=3702 GN=At2g31400 PE=2 SV=1 && PF13041:PPR repeat family|PF13812:Pentatricopeptide repeat domain|PF17177:Pentacotripeptide-repeat region of PRORP	-
Ila09G006350	2682	2595	2657	3171	3370	3522	155.5497412	148.7920575	142.0369449	177.3152387	172.0832979	195.2792702	3273.746877	2682.927411	0.287143583	0.012205856	0.044717518	Ila09G006350	GWHBIST00000009	8763275	8772972	-	1605	protein_coding	- && sp|Q9SAR5|AKR2A_ARATH Ankyrin repeat domain-containing protein 2A OS=Arabidopsis thaliana OX=3702 GN=AKR2A PE=1 SV=2 && PF12796:Ankyrin repeats (3 copies)|PF17830:STI1 domain	-
Ila18G018590	2271	2184	1943	3722	3646	4219	54.26049386	51.58828728	42.7896424	85.73976253	76.69756436	96.36790235	3775.916447	2168.604822	0.800134707	1.17E-07	2.28E-06	Ila18G018590	GWHBIST00000018	39990891	40014191	-	3896	protein_coding	- && sp|Q0WLC6|PP349_ARATH Pentatricopeptide repeat-containing protein MRL1, chloroplastic OS=Arabidopsis thaliana OX=3702 GN=MRL1 PE=1 SV=2 && PF17177:Pentacotripeptide-repeat region of PRORP|PF13041:PPR repeat family	-
Ila03G010120	2812	2852	3011	3232	3046	3014	93.02009516	93.27018794	91.80608488	103.0794552	88.7134895	95.31494102	3025.516979	2930.554418	0.045909033	0.683881566	0.811980227	Ila03G010120	GWHBIST00000003	22734837	22739449	+	2814	protein_coding	- && sp|Q9XHM1|EIF3C_MEDTR Eukaryotic translation initiation factor 3 subunit C OS=Medicago truncatula OX=3880 GN=TIF3C1 PE=2 SV=1 && PF05470:Eukaryotic translation initiation factor 3 subunit 8 N-terminus|PF01399:PCI domain	-
Ila05G011990	3071	3875	4494	1528	3636	1361	138.5690197	172.8581667	186.904021	66.47356672	144.4469922	58.70846506	2083.033469	3849.884439	-0.88597315	0.003270368	0.015443997	Ila05G011990	GWHBIST00000005	28614431	28617930	-	2063	protein_coding	- && sp|O48651|SQE1_PANGI Squalene monooxygenase SE1 OS=Panax ginseng OX=4054 GN=SQE1 PE=2 SV=1 && PF08491:Squalene epoxidase	-
Ila11G009050	1768	1517	1419	3814	4609	4828	75.77186834	64.27516256	56.05409939	157.5961935	173.9124782	197.8104674	4305.343416	1595.035297	1.432730005	3.62E-19	6.21E-17	Ila11G009050	GWHBIST00000011	26524978	26529283	+	2172	protein_coding	- && sp|O78328|DXS_CAPAN Probable 1-deoxy-D-xylulose-5-phosphate synthase, chloroplastic OS=Capsicum annuum OX=4072 GN=TKT2 PE=2 SV=1 && PF02780:Transketolase, C-terminal domain|PF02779:Transketolase, pyrimidine binding domain|PF13292:1-deoxy-D-xylulose-5-phosphate synthase	-
Ila02G005450	2182	2401	2476	3256	4205	3390	79.27955013	86.24431129	82.91943221	114.0591489	134.5150047	117.7504028	3514.597033	2383.6187	0.560305914	3.96E-06	5.08E-05	Ila02G005450	GWHBIST00000002	14602335	14608733	+	2562	protein_coding	- && sp|Q9S7C0|HSP7O_ARATH Heat shock 70 kDa protein 14 OS=Arabidopsis thaliana OX=3702 GN=HSP70-14 PE=1 SV=1 && PF00012:Hsp70 protein	HSP70
Ila16G002970	3130	3309	3788	2371	2983	2312	43.27342592	45.22781182	48.27098495	31.60441786	36.31018781	30.55772681	2482.865648	3448.552957	-0.47389453	0.000150913	0.00115715	Ila16G002970	GWHBIST00000016	3236418	3264688	+	6733	protein_coding	- && sp|Q5N749|MOR1_ORYSJ Protein MOR1 OS=Oryza sativa subsp. japonica OX=39947 GN=MOR1 PE=2 SV=1 && PF12348:CLASP N terminal	-
Ila16G024130	3110	3087	2399	2975	2648	3661	356.5249405	349.8630066	253.4889447	328.8181613	267.2672887	401.2227296	3032.604608	2918.783927	0.055195965	0.78020413	0.873688455	Ila16G024130	GWHBIST00000016	52180472	52181283	-	812	protein_coding	- && - && PF06596:Photosystem II reaction centre X protein (PsbX)	-
Ila16G014390	3041	5413	4061	2839	1608	899	228.470783	402.0537753	281.2201838	205.6453728	106.3649633	64.56991489	1747.266809	4230.336887	-1.275695584	0.017919342	0.06031293	Ila16G014390	GWHBIST00000016	38852116	38855209	+	1239	protein_coding	- && sp|O48781|SPX2_ARATH SPX domain-containing protein 2 OS=Arabidopsis thaliana OX=3702 GN=SPX2 PE=2 SV=1 && PF03105:SPX domain	SPX
Ila15G000200	3021	3429	3787	2446	2717	2412	86.55388581	97.12593163	100.0069997	67.56652713	68.53679372	66.06469293	2459.758874	3451.590353	-0.488792384	1.77E-05	0.00018466	Ila15G000200	GWHBIST00000015	216769	240995	+	3249	protein_coding	- && sp|Q9C6S7|PMTK_ARATH Probable methyltransferase PMT20 OS=Arabidopsis thaliana OX=3702 GN=At1g31850 PE=2 SV=1 && PF00069:Protein kinase domain|PF03141:Putative S-adenosyl-L-methionine-dependent methyltransferase	Pkinase
Ila01G000210	2913	2745	1888	2568	3263	4432	307.4379359	286.4119852	183.6615349	261.307148	303.2021978	447.1703455	3341.504093	2568.063523	0.379893141	0.122942815	0.258094237	Ila01G000210	GWHBIST00000001	292916	296881	-	882	protein_coding	- && sp|R4HZ96|D27_MEDTR Beta-carotene isomerase D27, chloroplastic OS=Medicago truncatula OX=3880 GN=D27 PE=1 SV=1 && PF13225:Domain of unknown function (DUF4033)	-
Ila05G006950	3185	2850	3636	3176	2933	1983	237.5638788	210.1588573	249.9735707	228.3971941	192.61111	141.4001784	2628.432497	3260.704102	-0.311007497	0.099311339	0.220357132	Ila05G006950	GWHBIST00000005	21683967	21686617	-	1248	protein_coding	- && sp|Q07512|FLS_PETHY Flavonol synthase/flavanone 3-hydroxylase OS=Petunia hybrida OX=4102 GN=FL PE=2 SV=1 && PF14226:non-haem dioxygenase in morphine synthesis N-terminal|PF03171:2OG-Fe(II) oxygenase superfamily	2OG-FeII_Oxy
Ila14G019590	2499	2306	1926	3574	3766	3668	78.48264174	71.59761035	55.7523128	108.2184239	104.1324227	110.1267839	3579.383021	2284.66572	0.647888632	2.72E-05	0.000269532	Ila14G019590	GWHBIST00000014	46637533	46656807	+	2964	protein_coding	- && sp|Q55680|Y005_SYNY3 Uncharacterized protein sll0005 OS=Synechocystis sp. (strain PCC 6803 / Kazusa) OX=1111708 GN=sll0005 PE=3 SV=1 && PF03109:ABC1 family|PF01636:Phosphotransferase enzyme family	ABC1
Ila02G009010	2803	2788	2921	3205	3381	2631	40.55343045	39.87761138	38.95249721	44.70661962	43.06733223	36.38996351	2991.622811	2876.443752	0.056702055	0.653687686	0.789800238	Ila02G009010	GWHBIST00000002	18879416	18931807	-	6434	protein_coding	- && sp|Q9SJM0|CALSA_ARATH Callose synthase 10 OS=Arabidopsis thaliana OX=3702 GN=CALS10 PE=2 SV=5 && PF02364:1,3-beta-glucan synthase component|PF14288:1,3-beta-glucan synthase subunit FKS1, domain-1	-
Ila03G001600	3244	4063	3657	3442	1777	1458	153.6752212	190.2837455	159.6787817	157.2074658	74.11544653	66.02931591	2188.084715	3706.049441	-0.760298835	0.008824938	0.034477481	Ila03G001600	GWHBIST00000003	2323440	2332164	+	1965	protein_coding	- && sp|Q8S4F6|SQD2_ARATH Sulfoquinovosyl transferase SQD2 OS=Arabidopsis thaliana OX=3702 GN=SQD2 PE=1 SV=1 && PF00534:Glycosyl transferases group 1|PF13439:Glycosyltransferase Family 4	Glycos_transf_1
Ila14G013450	2448	2358	2106	3060	4412	3239	93.23860521	88.78917547	73.93361982	112.3686286	147.9510864	117.937407	3461.933297	2342.642725	0.563663631	0.00047439	0.003078321	Ila14G013450	GWHBIST00000014	30558384	30560827	-	2444	protein_coding	- && sp|P09342|ILVB1_TOBAC Acetolactate synthase 1, chloroplastic OS=Nicotiana tabacum OX=4097 GN=ALS SURA PE=1 SV=1 && PF00205:Thiamine pyrophosphate enzyme, central domain|PF02776:Thiamine pyrophosphate enzyme, N-terminal TPP binding domain|PF02775:Thiamine pyrophosphate enzyme, C-terminal TPP binding domain	TPP_enzyme_N
Ila0G014300	3445	3800	3828	1998	2419	2094	147.4400675	160.783604	151.0071366	82.44438417	91.15079555	85.67601232	2111.756823	3740.422469	-0.824628655	7.48E-14	5.54E-12	Ila0G014300	GWHBIST00000257	451909	457553	-	2175	protein_coding	- && sp|O48651|SQE1_PANGI Squalene monooxygenase SE1 OS=Panax ginseng OX=4054 GN=SQE1 PE=2 SV=1 && PF08491:Squalene epoxidase	-
Ila18G008610	3047	2847	2420	3049	3251	2962	116.914187	107.9975975	85.58730948	112.7954246	109.8272298	108.65159	3009.600491	2820.85988	0.093578293	0.526795798	0.69176696	Ila18G008610	GWHBIST00000018	15828615	15846315	+	2426	protein_coding	- && sp|Q9FV46|ZDS_TARER Zeta-carotene desaturase, chloroplastic/chromoplastic OS=Tagetes erecta OX=13708 PE=2 SV=1 && PF01593:Flavin containing amine oxidoreductase	Amino_oxidase
Ila09G003110	2785	2695	3083	3026	3176	2773	70.50454689	67.45009465	71.93905019	73.85844325	70.7898057	67.11167346	2915.86746	2890.170051	0.012729311	0.905211094	0.949090194	Ila09G003110	GWHBIST00000009	3181271	3189493	+	3677	protein_coding	- && sp|F4JKK0|SUD1_ARATH Probable E3 ubiquitin ligase SUD1 OS=Arabidopsis thaliana OX=3702 GN=SUD1 PE=1 SV=1 && PF12906:RING-variant domain	-
Ila17G025820	2504	2621	2522	3082	3435	3347	65.30904494	67.58306702	60.62940957	77.50164884	78.87948198	83.45473703	3205.465163	2586.462572	0.309632014	0.004900423	0.021548663	Ila17G025820	GWHBIST00000017	48269840	48286781	-	3569	protein_coding	- && sp|Q500V5|AGDP1_ARATH Protein AGENET DOMAIN (AGD)-CONTAINING P1 OS=Arabidopsis thaliana OX=3702 GN=AGDP1 PE=1 SV=1 && PF05641:Agenet domain|PF05266:Protein of unknown function (DUF724)	Agenet
Ila05G002360	2841	2846	2748	2996	3199	2865	51.45098233	50.95528096	45.87102177	52.31226758	51.00761032	49.60247374	2943.502895	2854.093029	0.044604285	0.686182788	0.813346582	Ila05G002360	GWHBIST00000005	14134156	14141840	-	5140	protein_coding	- && sp|Q9C5U1|AHK3_ARATH Histidine kinase 3 OS=Arabidopsis thaliana OX=3702 GN=AHK3 PE=1 SV=1 && PF02518:Histidine kinase-, DNA gyrase B-, and HSP90-like ATPase|PF03924:CHASE domain|PF00512:His Kinase A (phospho-acceptor) domain|PF00072:Response regulator receiver domain	HATPase_c
Ila17G019030	3392	3177	3503	2779	2313	2329	134.8200578	124.8382718	128.3329127	106.4943364	80.94175161	88.49616001	2420.024319	3402.821702	-0.491848817	0.000501234	0.003233753	Ila17G019030	GWHBIST00000017	41216263	41222728	-	2342	protein_coding	- && sp|A7LXU3|BGH3B_BACO1 Beta-glucosidase BoGH3B OS=Bacteroides ovatus (strain ATCC 8483 / DSM 1896 / JCM 5824 / NCTC 11153) OX=411476 GN=BACOVA_02659 PE=1 SV=1 && PF01915:Glycosyl hydrolase family 3 C-terminal domain|PF00933:Glycosyl hydrolase family 3 N terminal domain	Glyco_hydro_3
Ila11G006020	3843	3566	2831	3418	1836	1965	142.465343	130.6929166	96.73373603	122.165957	59.92524531	69.63982492	2367.084933	3478.179783	-0.55528189	0.035138897	0.101235318	Ila11G006020	GWHBIST00000011	22004316	22009623	-	2511	protein_coding	- && sp|A7KTC5|PHT11_PETHY Low affinity inorganic phosphate transporter 1 OS=Petunia hybrida OX=4102 GN=PT1 PE=2 SV=1 && -	-
Ila04G009590	3305	3199	3045	2470	2742	2664	145.2549912	138.99709	123.3519859	104.6636445	106.1024351	111.9309251	2559.47723	3232.919158	-0.336897327	0.004595749	0.020447942	Ila04G009590	GWHBIST00000004	21736218	21741610	+	2118	protein_coding	- && sp|Q9ZNX9|SIGE_ARATH RNA polymerase sigma factor sigE, chloroplastic/mitochondrial OS=Arabidopsis thaliana OX=3702 GN=SIGE PE=1 SV=1 && PF04545:Sigma-70, region 4|PF04539:Sigma-70 region 3|PF04542:Sigma-70 region 2	Sigma70_r4
Ila04G000150	2596	2451	2357	2985	3404	3618	96.93217682	90.47705512	81.11891043	107.4600189	111.905422	129.1481271	3253.661356	2506.931494	0.376224937	0.005521347	0.023659855	Ila04G000150	GWHBIST00000004	928320	951575	+	2493	protein_coding	- && sp|Q93VK5|LUT5_ARATH Protein LUTEIN DEFICIENT 5, chloroplastic OS=Arabidopsis thaliana OX=3702 GN=CYP97A3 PE=1 SV=1 && PF00067:Cytochrome P450	p450
Ila09G004280	3599	3345	3630	2350	2222	2236	41.86671209	38.46936334	38.92179695	26.35689042	22.75775219	24.86652398	2216.920415	3573.682656	-0.688971539	4.03E-09	1.11E-07	Ila09G004280	GWHBIST00000009	4603560	4671342	+	8002	protein_coding	- && sp|Q9FR53|TOR_ARATH Serine/threonine-protein kinase TOR OS=Arabidopsis thaliana OX=3702 GN=TOR PE=1 SV=1 && PF08771:FKBP12-rapamycin binding domain|PF02259:FAT domain|PF02260:FATC domain|PF11865:Domain of unknown function (DUF3385)|PF00454:Phosphatidylinositol 3- and 4-kinase	PI3_PI4_kinase
Ila08G012480	3213	3239	4021	2605	2316	1968	163.7930645	163.2403806	188.9374739	128.0359152	103.9493166	95.91049877	2242.161625	3528.225856	-0.65418134	1.83E-05	0.000190032	Ila08G012480	GWHBIST00000008	32582005	32589936	-	1826	protein_coding	- && sp|O81154|CYSK_SOLTU Cysteine synthase OS=Solanum tuberosum OX=4113 PE=2 SV=1 && PF00291:Pyridoxal-phosphate dependent enzyme	PALP
Ila17G011960	3225	3351	3512	2745	2355	2172	75.63697932	77.69816331	75.920352	62.07062317	48.62881302	48.69905688	2369.167086	3407.463658	-0.524431587	0.000178639	0.001333856	Ila17G011960	GWHBIST00000017	28160164	28172502	-	3969	protein_coding	- && - && PF07944:Beta-L-arabinofuranosidase, GH127	-
Ila08G013260	3580	3385	2539	2469	2646	2737	99.41789716	92.93345577	64.98954487	66.1061608	64.69484643	72.66288148	2554.004929	3230.302564	-0.33881406	0.058021313	0.147823337	Ila08G013260	GWHBIST00000008	33439591	33458870	+	3352	protein_coding	- && sp|Q42910|PPDK_MESCR Pyruvate, phosphate dikinase, chloroplastic OS=Mesembryanthemum crystallinum OX=3544 GN=PPD PE=2 SV=1 && PF01326:Pyruvate phosphate dikinase, PEP/pyruvate binding domain|PF00391:PEP-utilising enzyme, mobile domain|PF02896:PEP-utilising enzyme, TIM barrel domain	-
Ila08G009010	2817	4348	5312	1329	2012	1528	120.3966846	183.7168895	209.2594096	54.76359642	75.71012398	62.43200858	1573.379116	4187.176481	-1.412041247	1.22E-10	4.73E-09	Ila08G009010	GWHBIST00000008	26674091	26676951	+	2178	protein_coding	- && sp|P68172|SAHH_NICSY Adenosylhomocysteinase OS=Nicotiana sylvestris OX=4096 GN=SAHH PE=2 SV=1 && PF00670:S-adenosyl-L-homocysteine hydrolase, NAD binding domain|PF05221:S-adenosyl-L-homocysteine hydrolase	-
Ila14G007030	3156	2778	3560	2942	2537	2369	170.6040763	148.4624141	177.3787767	153.3325566	120.7455618	122.4260231	2556.885353	3201.362859	-0.324438258	0.029822493	0.089479056	Ila14G007030	GWHBIST00000014	9800236	9803222	-	1722	protein_coding	- && sp|P43297|RD21A_ARATH Cysteine proteinase RD21A OS=Arabidopsis thaliana OX=3702 GN=RD21A PE=1 SV=1 && PF00112:Papain family cysteine protease|PF08246:Cathepsin propeptide inhibitor domain (I29)	Peptidase_C1
Ila10G000290	2777	2758	2258	3198	2932	3389	84.47729702	82.94500911	63.31218702	93.79547534	78.52833617	98.5580202	3104.071271	2644.017529	0.231471592	0.15794472	0.309652846	Ila10G000290	GWHBIST00000010	280011	283070	+	3060	protein_coding	- && sp|Q9C8E6|PMI1_ARATH Protein PLASTID MOVEMENT IMPAIRED 1 OS=Arabidopsis thaliana OX=3702 GN=PMI1 PE=1 SV=1 && PF10358:N-terminal C2 in EEIG1 and EHBP1 proteins	-
Ila19G013290	2552	2306	3134	2529	4724	2035	120.4645647	107.6142581	136.3568268	115.0977343	196.330076	91.8331183	2977.991383	2691.275419	0.146144986	0.568223962	0.724678606	Ila19G013290	GWHBIST00000019	31055927	31060359	+	1972	protein_coding	- && sp|O48922|C98A2_SOYBN Cytochrome P450 98A2 OS=Glycine max OX=3847 GN=CYP98A2 PE=2 SV=1 && PF00067:Cytochrome P450	p450
Ila19G001890	3139	5300	3936	2094	1545	1265	134.9643201	225.2866166	155.984697	86.80477833	58.48633931	51.99654096	1599.514567	4185.393157	-1.387799262	1.09E-08	2.69E-07	Ila19G001890	GWHBIST00000019	3141240	3147426	+	2165	protein_coding	- && sp|Q8S4F6|SQD2_ARATH Sulfoquinovosyl transferase SQD2 OS=Arabidopsis thaliana OX=3702 GN=SQD2 PE=1 SV=1 && -	-
Ila18G016650	3781	3619	3081	1507	2793	2484	159.2575242	150.7001669	119.6146102	61.19921258	103.5768069	100.0232925	2191.490067	3555.158145	-0.697845271	0.001304785	0.007197044	Ila18G016650	GWHBIST00000018	38071958	38076664	+	2210	protein_coding	- && sp|P38500|NIR_BETPN Ferredoxin--nitrite reductase, chloroplastic OS=Betula pendula OX=3505 GN=NIR1 PE=2 SV=1 && PF01077:Nitrite and sulphite reductase 4Fe-4S domain|PF03460:Nitrite/Sulfite reductase ferredoxin-like half domain	-
Ila06G006210	2478	2887	2849	2900	3063	3059	79.26726418	91.30009275	84.000963	89.43960338	86.26564309	93.54666658	2934.149019	2774.135856	0.080850068	0.482974452	0.652872886	Ila06G006210	GWHBIST00000006	6147341	6151295	-	2910	protein_coding	- && - && PF14383:DUF761-associated sequence motif|PF14309:Domain of unknown function (DUF4378)	-
Ila15G009840	2473	2305	1984	3674	3106	3676	176.4002356	162.5465821	130.441553	252.6698928	195.0629537	250.6725735	3413.095915	2293.893325	0.573322505	0.000741413	0.004510926	Ila15G009840	GWHBIST00000015	13599873	13619127	+	1305	protein_coding	- && sp|Q9SZ54|GPX7_ARATH Putative glutathione peroxidase 7, chloroplastic OS=Arabidopsis thaliana OX=3702 GN=GPX7 PE=3 SV=2 && PF00255:Glutathione peroxidase	GSHPx
Ila14G004220	3069	2899	3077	2853	3062	2245	18.01612633	16.82459478	16.64911966	16.14751145	15.8258854	12.59903109	2646.779109	3057.545688	-0.208049507	0.136902204	0.279097331	Ila14G004220	GWHBIST00000014	4880961	4911941	+	15857	protein_coding	- && sp|Q9SRU2|BIG_ARATH Auxin transport protein BIG OS=Arabidopsis thaliana OX=3702 GN=BIG PE=1 SV=2 && PF00569:Zinc finger, ZZ type|PF13764:E3 ubiquitin-protein ligase UBR4	ZZ
Ila14G016800	2824	2783	3247	2887	2888	2576	72.59750976	70.72974712	76.93758826	71.5555155	65.36609194	63.30808291	2715.109697	2986.785906	-0.137686798	0.224971386	0.396263409	Ila14G016800	GWHBIST00000014	40491446	40520747	-	3621	protein_coding	- && sp|Q9FPT1|UBP12_ARATH Ubiquitin C-terminal hydrolase 12 OS=Arabidopsis thaliana OX=3702 GN=UBP12 PE=1 SV=2 && PF00443:Ubiquitin carboxyl-terminal hydrolase|PF12436:ICP0-binding domain of Ubiquitin-specific protease 7|PF00917:MATH domain|PF14533:Ubiquitin-specific protease C-terminal	UCH
Ila03G006280	1956	1908	2594	3554	3910	3275	75.30054338	72.61719974	92.044635	131.9125096	132.5269848	120.5304662	3485.888724	2172.850439	0.681782489	8.72E-07	1.35E-05	Ila03G006280	GWHBIST00000003	16125918	16131115	-	2418	protein_coding	- && sp|P54774|CDC48_SOYBN Cell division cycle protein 48 homolog OS=Glycine max OX=3847 GN=CDC48 PE=2 SV=1 && PF00004:ATPase family associated with various cellular activities (AAA)|PF02933:Cell division protein 48 (CDC48), domain 2|PF02359:Cell division protein 48 (CDC48), N-terminal domain|PF17862:AAA+ lid domain	AAA
Ila16G000080	2380	2694	3212	2835	3222	2824	81.42053871	91.1142854	101.2818906	93.50813113	97.04671756	92.35873569	2882.788117	2790.094272	0.047052445	0.711390907	0.830063454	Ila16G000080	GWHBIST00000016	121507	126704	+	2721	protein_coding	- && sp|Q93ZX7|GAUT4_ARATH Probable galacturonosyltransferase 4 OS=Arabidopsis thaliana OX=3702 GN=GAUT4 PE=2 SV=1 && PF01501:Glycosyl transferase family 8	Glyco_transf_8
Ila05G003820	2873	3543	2641	2523	2663	2817	114.9277221	140.1174396	97.37709685	97.30736737	93.79045432	107.7289166	2604.031408	3071.072674	-0.237942795	0.145070741	0.290381748	Ila05G003820	GWHBIST00000005	16406591	16410847	+	2327	protein_coding	- && sp|Q38954|PHT21_ARATH Inorganic phosphate transporter 2-1, chloroplastic OS=Arabidopsis thaliana OX=3702 GN=PHT2-1 PE=1 SV=1 && PF01384:Phosphate transporter family	-
Ila09G013860	2564	2577	2076	2947	2959	3925	226.2304802	224.7912399	168.8339162	250.6989598	229.8668592	331.0770143	3206.622224	2448.913213	0.388953197	0.038684409	0.10881662	Ila09G013860	GWHBIST00000009	31124812	31125866	-	1055	protein_coding	- && sp|P82658|TL19_ARATH Thylakoid lumenal 19 kDa protein, chloroplastic OS=Arabidopsis thaliana OX=3702 GN=At3g63540 PE=1 SV=2 && PF01789:PsbP	-
Ila08G011940	2569	2394	2697	3235	2917	3229	154.6821397	142.505649	149.6774107	187.7974328	154.6360672	185.8661846	3058.582655	2587.118992	0.241384043	0.061015223	0.153344892	Ila08G011940	GWHBIST00000008	32005406	32009025	+	1546	protein_coding	- && sp|A3C4S4|GME1_ORYSJ GDP-mannose 3,5-epimerase 1 OS=Oryza sativa subsp. japonica OX=39947 GN=GME-1 PE=1 SV=1 && PF01370:NAD dependent epimerase/dehydratase family	Epimerase
Ila09G014590	2350	2116	1690	3274	3412	4172	173.7511503	154.6704528	115.1717005	233.3876122	222.1095073	294.8902395	3537.867957	2091.419206	0.758508478	6.72E-05	0.000578985	Ila09G014590	GWHBIST00000009	31948395	31951764	+	1259	protein_coding	- && sp|O80360|RK3_TOBAC 50S ribosomal protein L3, chloroplastic (Fragment) OS=Nicotiana tabacum OX=4097 GN=RPL3 PE=2 SV=1 && PF00297:Ribosomal protein L3	-
Ila16G001020	2484	2915	3669	2831	2692	2423	98.89916865	114.7391098	134.6443114	108.6726402	94.365752	92.22544	2585.146379	3049.345629	-0.238415174	0.125395224	0.261893267	Ila16G001020	GWHBIST00000016	984279	992176	+	2338	protein_coding	- && sp|P21343|PFPB_SOLTU Pyrophosphate--fructose 6-phosphate 1-phosphotransferase subunit beta OS=Solanum tuberosum OX=4113 GN=PFP-BETA PE=1 SV=3 && PF00365:Phosphofructokinase	PFK
Ila09G005780	3250	2935	2822	2314	2840	2823	94.18752406	84.09109211	75.38176077	64.65657178	72.46472691	78.21268048	2590.111635	3051.114813	-0.236204365	0.095800415	0.214911399	Ila09G005780	GWHBIST00000009	7645988	7655233	+	3212	protein_coding	- && sp|A8MQN2|LNK1_ARATH Protein LNK1 OS=Arabidopsis thaliana OX=3702 GN=LNK1 PE=1 SV=1 && -	-
Ila09G008830	2768	2714	3718	2999	2625	2145	108.9483098	105.6078308	134.8848102	113.8073148	90.96661182	80.71197603	2528.402394	3094.819493	-0.291758306	0.093880696	0.211710922	Ila09G008830	GWHBIST00000009	16645864	16659909	-	2365	protein_coding	- && sp|Q42456|ASPR1_ORYSJ Aspartic proteinase oryzasin-1 OS=Oryza sativa subsp. japonica OX=39947 GN=Os05g0567100 PE=2 SV=2 && PF03489:Saposin-like type B, region 2|PF05184:Saposin-like type B, region 1|PF00026:Eukaryotic aspartyl protease	Asp
Ila18G016510	3352	4086	5271	1422	1272	1564	419.3886092	505.4088595	607.861847	171.5345141	140.1193236	187.0706442	1389.517445	4270.207167	-1.619980573	3.71E-19	6.32E-17	Ila18G016510	GWHBIST00000018	37946765	37948868	-	744	protein_coding	- && sp|Q43095|CAMT_POPTM Caffeoyl-CoA O-methyltransferase OS=Populus tremuloides OX=3693 PE=2 SV=1 && PF01596:O-methyltransferase	-
Ila15G003610	2643	3185	3919	3142	1995	2035	123.3217899	146.9210287	168.5455025	141.3475016	81.9565855	90.77439062	2346.450828	3278.146363	-0.482567455	0.030089252	0.090116182	Ila15G003610	GWHBIST00000015	4504018	4506288	-	1995	protein_coding	- && sp|A0A0M3R8G2|SBT_PETHY Subtilisin-like protease OS=Petunia hybrida OX=4102 GN=SBT PE=2 SV=1 && PF00082:Subtilase family|PF05922:Peptidase inhibitor I9|PF17766:Fibronectin type-III domain|PF02225:PA domain	Peptidase_S8
Ila15G002140	2712	2644	2732	2648	3775	2358	88.42379066	85.22612879	82.10306821	83.24089171	108.3664134	73.49867616	2834.366584	2734.369547	0.052000683	0.754883712	0.858645505	Ila15G002140	GWHBIST00000015	2842009	2853635	+	2855	protein_coding	- && sp|O65202|ACOX1_ARATH Peroxisomal acyl-coenzyme A oxidase 1 OS=Arabidopsis thaliana OX=3702 GN=ACX1 PE=1 SV=1 && PF01756:Acyl-CoA oxidase|PF02770:Acyl-CoA dehydrogenase, middle domain|PF14749:Acyl-coenzyme A oxidase N-terminal	-
Ila16G024240	2934	2828	2975	2333	3113	2683	49.47736791	47.14740034	46.24158343	37.93154363	46.21935701	43.25371591	2633.629166	2953.244559	-0.165084045	0.185659453	0.3475045	Ila16G024240	GWHBIST00000016	52277168	52292787	-	5520	protein_coding	- && sp|F4K5J1|MYO17_ARATH Myosin-17 OS=Arabidopsis thaliana OX=3702 GN=XI-K PE=1 SV=2 && PF02736:Myosin N-terminal SH3-like domain|PF01843:DIL domain|PF00063:Myosin head (motor domain)	Myosin_head
Ila08G006100	2701	1815	1533	3797	3221	3798	170.9218039	113.5484945	89.41580418	231.6609218	179.457622	229.7651284	3530.386553	2059.597593	0.777560386	0.000860713	0.005109412	Ila08G006100	GWHBIST00000008	17758885	17762156	+	1471	protein_coding	- && sp|P49313|ROC1_NICPL 30 kDa ribonucleoprotein, chloroplastic OS=Nicotiana plumbaginifolia OX=4092 PE=2 SV=1 && PF00076:RNA recognition motif. (a.k.a. RRM, RBD, or RNP domain)	RRM_1
Ila02G001080	1496	1437	1274	3879	3781	4987	108.79456	103.3152004	85.39732422	271.9785573	242.0920701	346.7138792	4126.052897	1426.059552	1.532827814	2.86E-18	4.42E-16	Ila02G001080	GWHBIST00000002	7646341	7654332	+	1280	protein_coding	- && sp|Q9SW18|CHLM_ARATH Magnesium protoporphyrin IX methyltransferase, chloroplastic OS=Arabidopsis thaliana OX=3702 GN=CHLM PE=1 SV=1 && PF07109:Magnesium-protoporphyrin IX methyltransferase C-terminus	-
Ila11G002520	2498	2660	3117	2722	3247	2584	64.41259387	67.80970555	74.0822911	67.67149557	73.71552164	63.69819646	2772.502406	2788.986897	-0.008550011	0.944724555	0.971952566	Ila11G002520	GWHBIST00000011	13515644	13537992	-	3610	protein_coding	- && sp|Q9M8Y0|SEC_ARATH Probable UDP-N-acetylglucosamine--peptide N-acetylglucosaminyltransferase SEC OS=Arabidopsis thaliana OX=3702 GN=SEC PE=1 SV=1 && PF13844:Glycosyl transferase family 41|PF13414:TPR repeat|PF00515:Tetratricopeptide repeat	TPR_1
Ila12G012060	1626	1703	1328	3549	4028	4593	163.1015624	168.8822847	122.7820566	343.2281337	355.7339724	440.443594	3959.649496	1580.397203	1.325259602	2.05E-14	1.65E-12	Ila12G012060	GWHBIST00000012	30609877	30611891	-	928	protein_coding	- && sp|Q9LU21|PNSB3_ARATH Photosynthetic NDH subunit of subcomplex B 3, chloroplastic OS=Arabidopsis thaliana OX=3702 GN=PNSB3 PE=2 SV=1 && PF00111:2Fe-2S iron-sulfur cluster binding domain	Fer2
Ila03G005150	2658	2586	2691	3093	2982	2806	48.80143286	46.93944875	45.53973962	54.75160017	48.20405088	49.25173521	2889.841795	2682.383911	0.107444588	0.344227047	0.52795294	Ila03G005150	GWHBIST00000003	9941675	9953532	+	5070	protein_coding	- && sp|A8MS85|SPT61_ARATH Transcription elongation factor SPT6 homolog OS=Arabidopsis thaliana OX=3702 GN=SPT6 PE=1 SV=1 && PF14635:Helix-hairpin-helix motif|PF14641:Helix-turn-helix DNA-binding domain of SPT6|PF17674:HHH domain|PF14632:Acidic N-terminal SPT6|PF14633:SH2 domain|PF14639:Holliday-junction resolvase-like of SPT6	-
Ila06G013770	2709	3318	3063	2916	2317	2480	209.2702602	253.4000864	218.0945206	217.1827503	157.587891	183.1498058	2517.617248	3071.952965	-0.287220725	0.073576914	0.17629017	Ila06G013770	GWHBIST00000006	22780119	22785190	-	1205	protein_coding	- && - && -	-
Ila08G005590	2439	3103	3864	2220	2727	2426	117.2713713	147.5006202	171.2444754	102.9135305	115.4419466	111.5134551	2391.537241	3161.102839	-0.402559349	0.014258372	0.050390245	Ila08G005590	GWHBIST00000008	15015123	15032004	-	1936	protein_coding	- && sp|P22241|DRPD_CRAPL Desiccation-related protein PCC27-45 OS=Craterostigma plantagineum OX=4153 PE=2 SV=1 && PF03168:Late embryogenesis abundant protein	-
Ila16G020950	2367	2297	1900	3122	3282	3785	177.976708	170.7488449	131.6793763	226.3273872	217.2710126	272.0740164	3317.915366	2227.196215	0.575149564	0.000506085	0.003258702	Ila16G020950	GWHBIST00000016	47679623	47692252	+	1238	protein_coding	- && sp|O82234|IF32_ARATH Translation initiation factor IF3-2, chloroplastic OS=Arabidopsis thaliana OX=3702 GN=IF3-2 PE=2 SV=1 && PF00707:Translation initiation factor IF-3, C-terminal domain|PF05198:Translation initiation factor IF-3, N-terminal domain	-
Ila13G014070	3122	3021	3100	2595	2363	2550	140.3938583	134.3067387	128.4920189	112.5101937	93.55720364	109.6255193	2447.17802	3125.455326	-0.353059552	0.004983161	0.021862733	Ila13G014070	GWHBIST00000013	28564519	28571694	+	2070	protein_coding	- && sp|O82802|SIR1_TOBAC Sulfite reductase 1 [ferredoxin], chloroplastic OS=Nicotiana tabacum OX=4097 GN=SIR1 PE=1 SV=1 && PF03460:Nitrite/Sulfite reductase ferredoxin-like half domain|PF01077:Nitrite and sulphite reductase 4Fe-4S domain	-
Ila15G007280	3161	3309	4844	1839	2022	1526	151.1277096	156.4041381	213.4631863	84.76969751	85.11361884	69.74778348	1747.187496	3798.655556	-1.120498013	1.77E-10	6.62E-09	Ila15G007280	GWHBIST00000015	9160730	9166060	+	1947	protein_coding	- && sp|P49043|VPE_CITSI Vacuolar-processing enzyme OS=Citrus sinensis OX=2711 PE=2 SV=1 && PF01650:Peptidase C13 family	-
Ila06G006720	2800	2612	2590	3042	2855	2776	117.0370511	107.937009	99.78479093	122.592485	105.0678274	110.927972	2823.725815	2708.392444	0.060170488	0.636370862	0.776310868	Ila06G006720	GWHBIST00000006	6657129	6664374	+	2227	protein_coding	- && sp|Q42404|RU17_ARATH U1 small nuclear ribonucleoprotein 70 kDa OS=Arabidopsis thaliana OX=3702 GN=RNU1 PE=1 SV=1 && PF12220:U1 small nuclear ribonucleoprotein of 70kDa MW N terminal|PF00076:RNA recognition motif. (a.k.a. RRM, RBD, or RNP domain)	RRM_1
Ila17G020660	2532	2320	2047	3039	3306	3419	147.4011235	133.5232655	109.8383964	170.5717449	169.4487002	190.2797033	3175.415737	2339.871678	0.440649136	0.002990683	0.014297932	Ila17G020660	GWHBIST00000017	43133782	43141308	-	1599	protein_coding	- && sp|Q9LSV0|GLYR1_ARATH Glyoxylate/succinic semialdehyde reductase 1 OS=Arabidopsis thaliana OX=3702 GN=GLYR1 PE=1 SV=1 && PF03446:NAD binding domain of 6-phosphogluconate dehydrogenase|PF14833:NAD-binding of NADP-dependent 3-hydroxyisobutyrate dehydrogenase	NAD_binding_2
Ila05G009080	2394	2558	2683	3086	2929	3010	190.4687978	201.2019114	196.7522084	236.7199801	205.1716572	228.9404133	2939.206138	2578.135987	0.188965289	0.099173099	0.220155734	Ila05G009080	GWHBIST00000005	25018891	25023026	+	1170	protein_coding	- && sp|P35684|RL3_ORYSJ 60S ribosomal protein L3 OS=Oryza sativa subsp. japonica OX=39947 GN=RPL3 PE=2 SV=2 && PF00297:Ribosomal protein L3	-
Ila16G022230	2798	2707	2482	3383	2178	3073	97.62194161	93.37268648	79.8179844	113.7996767	66.90458891	102.4987487	2829.528529	2705.733959	0.064455807	0.753543878	0.857639926	Ila16G022230	GWHBIST00000016	49296109	49299727	-	2668	protein_coding	- && sp|Q9LU68|CIA2_ARATH Protein CHLOROPLAST IMPORT APPARATUS 2 OS=Arabidopsis thaliana OX=3702 GN=CIA2 PE=1 SV=1 && PF06203:CCT motif	CCT
Ila05G001670	3178	2429	1543	2619	3101	3748	306.87564	231.882463	137.3326173	243.8278562	263.6383523	345.9906614	3080.980807	2440.688693	0.336208927	0.206604655	0.373793863	Ila05G001670	GWHBIST00000005	12404129	12405310	+	964	protein_coding	- && sp|Q03200|LIRP1_ORYSJ Light-regulated protein, chloroplastic OS=Oryza sativa subsp. japonica OX=39947 GN=LIR1 PE=1 SV=1 && PF07207:Light regulated protein Lir1	-
Ila20G006510	2849	2920	2378	2632	2897	2930	145.2369875	147.1632946	111.7367105	129.3629669	130.0264119	142.7935779	2750.140085	2763.501845	-0.006875102	0.963147998	0.981284631	Ila20G006510	GWHBIST00000020	7004957	7010125	-	1826	protein_coding	- && sp|P23509|GLGS_SOLTU Glucose-1-phosphate adenylyltransferase small subunit, chloroplastic/amyloplastic OS=Solanum tuberosum OX=4113 PE=1 SV=2 && PF00483:Nucleotidyl transferase	-
Ila02G005510	2554	2896	3499	2357	2839	2442	72.02129479	80.73660012	90.94592047	64.08242146	70.48613943	65.83274497	2477.287731	3012.577534	-0.282287027	0.034494009	0.099926611	Ila02G005510	GWHBIST00000002	14677888	14690080	+	3301	protein_coding	- && sp|Q9C827|COB22_ARATH Coatomer subunit beta'-2 OS=Arabidopsis thaliana OX=3702 GN=At1g52360 PE=1 SV=1 && PF00400:WD domain, G-beta repeat|PF04053:Coatomer WD associated region	Coatomer_WDAD
Ila16G020760	2338	2262	2342	3402	3272	2914	100.8039199	96.41783647	93.07200142	141.4185965	124.2065529	120.1098802	3118.689246	2347.041236	0.410105726	0.000696108	0.004283612	Ila16G020760	GWHBIST00000016	47445300	47453810	+	2159	protein_coding	- && sp|Q42876|AMPL2_SOLLC Leucine aminopeptidase 2, chloroplastic OS=Solanum lycopersicum OX=4081 GN=LAPA2 PE=2 SV=1 && PF02789:Cytosol aminopeptidase family, N-terminal domain|PF00883:Cytosol aminopeptidase family, catalytic domain	-
Ila03G009480	2528	3489	5476	1468	1899	1635	92.17471661	125.7672539	184.0337304	51.60598793	60.96183152	56.99132719	1621.072421	3843.093903	-1.245363394	8.71E-08	1.75E-06	Ila03G009480	GWHBIST00000003	21775073	21778861	-	2553	protein_coding	- && sp|Q66GR0|FLA17_ARATH Fasciclin-like arabinogalactan protein 17 OS=Arabidopsis thaliana OX=3702 GN=FLA17 PE=2 SV=1 && PF02469:Fasciclin domain	-
Ila08G006010	2331	2292	2202	3089	3460	3114	41.7919991	40.62537224	36.38877499	53.3959208	54.61667678	53.37350862	3137.842981	2309.957413	0.442071957	8.57E-05	0.000711009	Ila08G006010	GWHBIST00000008	17436082	17519961	+	5192	protein_coding	- && sp|Q9S775|PKL_ARATH CHD3-type chromatin-remodeling factor PICKLE OS=Arabidopsis thaliana OX=3702 GN=PKL PE=1 SV=1 && PF06461:Domain of Unknown Function (DUF1086)|PF00385:Chromo (CHRromatin Organisation MOdifier) domain|PF00176:SNF2 family N-terminal domain|PF06465:Domain of Unknown Function (DUF1087)|PF00271:Helicase conserved C-terminal domain|PF00628:PHD-finger	SNF2_N
Ila08G006830	2655	2464	2467	3221	2864	2808	67.54413933	61.97202934	57.84842573	79.00474416	64.14967502	68.29305214	2897.312137	2567.32185	0.174435342	0.199751315	0.365616809	Ila08G006830	GWHBIST00000008	20104666	20109160	-	3659	protein_coding	- && sp|F4I116|SYLC_ARATH Leucine--tRNA ligase, cytoplasmic OS=Arabidopsis thaliana OX=3702 GN=At1g09620 PE=1 SV=1 && PF00133:tRNA synthetases class I (I, L, M and V)|PF08264:Anticodon-binding domain of tRNA	-
Ila07G006360	2793	2510	2567	2699	2920	2953	57.05286569	50.68881246	48.33165255	53.1555617	52.5155211	57.66685237	2787.381864	2663.4105	0.065696264	0.591610599	0.742820976	Ila07G006360	GWHBIST00000007	20336063	20349108	+	4557	protein_coding	- && sp|P52780|SYQ_LUPLU Glutamine--tRNA ligase OS=Lupinus luteus OX=3873 PE=2 SV=2 && PF03950:tRNA synthetases class I (E and Q), anti-codon binding domain|PF00749:tRNA synthetases class I (E and Q), catalytic domain|PF04558:Glutaminyl-tRNA synthetase, non-specific RNA binding region part 1|PF04557:Glutaminyl-tRNA synthetase, non-specific RNA binding region part 2	-
Ila15G007200	2577	2695	2844	2712	3013	2571	111.4699247	115.2481404	113.3893145	113.1025181	114.7468365	106.3167368	2692.99177	2740.871674	-0.025377373	0.805788105	0.891337754	Ila15G007200	GWHBIST00000015	9072938	9083312	+	2152	protein_coding	- && sp|Q96AE4|FUBP1_HUMAN Far upstream element-binding protein 1 OS=Homo sapiens OX=9606 GN=FUBP1 PE=1 SV=3 && PF00013:KH domain	KH_1
Ila18G005920	1726	1229	1232	3285	3736	5203	104.3969301	73.4904128	68.68420767	191.5674021	198.9537384	300.8548622	3984.586888	1421.058532	1.487566804	5.20E-11	2.23E-09	Ila18G005920	GWHBIST00000018	7760860	7765069	-	1539	protein_coding	- && sp|P82277|RRP2_SPIOL 30S ribosomal protein 2, chloroplastic OS=Spinacia oleracea OX=3562 GN=PSRP2 PE=1 SV=1 && PF00076:RNA recognition motif. (a.k.a. RRM, RBD, or RNP domain)	RRM_1
Ila03G011180	3534	3049	2517	2024	2457	2821	178.4952922	152.2472697	117.1770837	98.56211827	109.2606243	136.2133204	2374.431716	3091.40444	-0.38059992	0.050518865	0.132839752	Ila03G011180	GWHBIST00000003	24285828	24292801	-	1843	protein_coding	- && sp|F4J3G5|CTPA3_ARATH Carboxyl-terminal-processing peptidase 3, chloroplastic OS=Arabidopsis thaliana OX=3702 GN=CTPA3 PE=3 SV=1 && PF03572:Peptidase family S41|PF00595:PDZ domain	Peptidase_S41
Ila13G014380	2362	2578	2744	3017	2835	2854	94.20297054	101.6481515	100.8714027	116.0110384	99.54880887	108.8165483	2835.178949	2593.473099	0.128400499	0.275074273	0.454932037	Ila13G014380	GWHBIST00000013	29052308	29057458	-	2334	protein_coding	- && sp|P27081|ADT2_SOLTU ADP,ATP carrier protein, mitochondrial (Fragment) OS=Solanum tuberosum OX=4113 GN=ANT1 PE=2 SV=1 && PF00153:Mitochondrial carrier protein	Mito_carr
Ila10G007070	3588	3176	3433	2093	2314	1772	61.30570509	53.64889962	54.06566003	34.47918448	34.81048804	28.94465965	2004.152553	3448.309645	-0.782771002	4.86E-09	1.32E-07	Ila10G007070	GWHBIST00000010	9232020	9251571	+	5448	protein_coding	- && sp|Q9SQI2|GIGAN_ARATH Protein GIGANTEA OS=Arabidopsis thaliana OX=3702 GN=GI PE=1 SV=2 && -	-
Ila13G009580	2273	3335	5343	1305	2115	1999	165.3008255	239.7746647	358.145921	91.50090673	135.4204518	138.9775505	1753.886417	3658.397532	-1.060682377	8.69E-05	0.000719167	Ila13G009580	GWHBIST00000013	21243680	21251060	+	1280	protein_coding	- && sp|Q9SN95|UXS5_ARATH UDP-glucuronic acid decarboxylase 5 OS=Arabidopsis thaliana OX=3702 GN=UXS5 PE=2 SV=1 && PF16363:GDP-mannose 4,6 dehydratase	-
Ila08G010130	1603	1392	1690	4392	2820	4469	71.60137526	61.46939582	69.57829699	189.1426513	110.9009458	190.8334354	3830.89993	1581.51278	1.27626205	2.28E-09	6.62E-08	Ila08G010130	GWHBIST00000008	29213316	29217070	-	2084	protein_coding	- && sp|Q9LIR6|BAM1_ARATH Beta-amylase 1, chloroplastic OS=Arabidopsis thaliana OX=3702 GN=BAM1 PE=1 SV=1 && PF01373:Glycosyl hydrolase family 14	-
Ila17G012500	2360	2507	2513	2746	3056	3181	64.65084189	67.89665569	63.45325697	72.52738416	73.70786501	83.30712045	2920.899508	2494.086422	0.227896806	0.050299451	0.132322824	Ila17G012500	GWHBIST00000017	29457226	29509579	-	3398	protein_coding	- && sp|Q8RWQ4|RGAP7_ARATH Rho GTPase-activating protein 7 OS=Arabidopsis thaliana OX=3702 GN=ROPGAP7 PE=2 SV=1 && PF00620:RhoGAP domain|PF14389:Leucine-zipper of ternary complex factor MIP1|PF00169:PH domain	RhoGAP
Ila12G012170	5089	1800	1762	4470	1422	1805	106.1905289	37.13280062	33.88897906	89.92908106	26.12469504	36.00698946	2540.269397	2960.441522	-0.220839235	0.762587772	0.862702186	Ila12G012170	GWHBIST00000012	30694913	30705089	+	4461	protein_coding	- && sp|Q9XIE2|AB36G_ARATH ABC transporter G family member 36 OS=Arabidopsis thaliana OX=3702 GN=ABCG36 PE=1 SV=1 && PF14510:ABC-transporter N-terminal|PF01061:ABC-2 type transporter|PF00005:ABC transporter|PF08370:Plant PDR ABC transporter associated	ABC2_membrane
Ila12G012800	2721	2794	2448	2748	2432	3175	131.7148719	133.7102009	109.2237125	128.2514547	103.6497223	146.9285775	2728.058928	2697.9506	0.015969386	0.924337557	0.960199585	Ila12G012800	GWHBIST00000012	31276967	31280678	+	1923	protein_coding	- && sp|Q43866|INV1_ARATH Beta-fructofuranosidase, insoluble isoenzyme CWINV1 OS=Arabidopsis thaliana OX=3702 GN=CWINV1 PE=1 SV=1 && PF00251:Glycosyl hydrolases family 32 N-terminal domain|PF08244:Glycosyl hydrolases family 32 C terminal	-
Ila14G024940	1546	1355	1181	4283	3623	4305	57.56453981	49.87888198	40.53168825	153.7563007	118.7714837	153.2409994	3986.063436	1385.34857	1.524861722	7.62E-18	1.08E-15	Ila14G024940	GWHBIST00000014	53557561	53564399	+	2500	protein_coding	- && sp|Q41382|RH7_SPIOL DEAD-box ATP-dependent RNA helicase 7 OS=Spinacia oleracea OX=3562 GN=RH7 PE=2 SV=1 && PF00271:Helicase conserved C-terminal domain|PF08152:GUCT (NUC152) domain|PF00270:DEAD/DEAH box helicase	DEAD
Ila13G004430	2319	2323	2386	2941	3275	3047	153.3146479	151.8322328	145.3960437	187.4637177	190.6305522	192.5801976	3008.995078	2375.57753	0.341078371	0.000688839	0.004244512	Ila13G004430	GWHBIST00000013	5346929	5351348	-	1408	protein_coding	- && sp|A2XAZ3|ADHX_ORYSI Alcohol dehydrogenase class-3 OS=Oryza sativa subsp. indica OX=39946 GN=ADHIII PE=3 SV=1 && PF08240:Alcohol dehydrogenase GroES-like domain|PF00107:Zinc-binding dehydrogenase	ADH_zinc_N
Ila18G000030	2886	3050	3157	2459	2365	2352	110.8736816	115.8414137	111.7907764	91.08145722	79.99476876	86.38249264	2336.09983	3071.496331	-0.39496791	0.000373283	0.002498644	Ila18G000030	GWHBIST00000018	59582	70351	+	2423	protein_coding	- && sp|Q9FMK9|PPA29_ARATH Probable inactive purple acid phosphatase 29 OS=Arabidopsis thaliana OX=3702 GN=PAP29 PE=2 SV=1 && PF00149:Calcineurin-like phosphoesterase	Metallophos
Ila06G007710	3196	3858	5325	1312	1132	1444	163.3737889	194.9708573	250.8964238	64.66194219	50.94720197	70.56658099	1269.58967	4154.602693	-1.710621463	3.99E-18	6.00E-16	Ila06G007710	GWHBIST00000006	7899589	7903005	+	1821	protein_coding	- && sp|Q42600|C84A1_ARATH Cytochrome P450 84A1 OS=Arabidopsis thaliana OX=3702 GN=CYP84A1 PE=1 SV=1 && PF00067:Cytochrome P450	p450
Ila18G008370	2648	2537	1981	2681	2948	3468	169.99476	161.0163171	117.2198815	165.9409865	166.6262166	212.8398358	2961.550353	2433.885996	0.283186777	0.124086868	0.259897108	Ila18G008370	GWHBIST00000018	14743825	14745274	+	1450	protein_coding	- && sp|Q9S726|RPI3_ARATH Probable ribose-5-phosphate isomerase 3, chloroplastic OS=Arabidopsis thaliana OX=3702 GN=RPI3 PE=1 SV=1 && PF06026:Ribose 5-phosphate isomerase A (phosphoriboisomerase A)	Rib_5-P_isom_A
Ila05G014040	2062	2110	1524	3035	3468	4058	81.19452491	82.13956658	55.31237409	115.2221776	120.230727	152.7588566	3436.738919	1935.620949	0.828385018	2.04E-05	0.000209461	Ila05G014040	GWHBIST00000005	30787629	30792047	-	2364	protein_coding	- && sp|P82278|RR9_SPIOL 30S ribosomal protein S9, chloroplastic OS=Spinacia oleracea OX=3562 GN=PRPS9 PE=1 SV=2 && PF00380:Ribosomal protein S9/S16	-
Ila01G001380	2522	2753	3359	2288	2910	2422	77.12336858	83.22982608	94.67823658	67.45842975	78.34877261	70.80620519	2469.223279	2907.158675	-0.235559128	0.080297852	0.187994951	Ila01G001380	GWHBIST00000001	1449228	1457472	+	3044	protein_coding	- && sp|Q9SUS3|APBLB_ARATH Beta-adaptin-like protein B OS=Arabidopsis thaliana OX=3702 GN=BETAB-AD PE=1 SV=1 && PF02883:Adaptin C-terminal domain|PF01602:Adaptin N terminal region|PF09066:Beta2-adaptin appendage, C-terminal sub-domain	-
Ila12G013370	2222	2046	2558	3105	3497	2821	68.55739397	62.40907461	72.7461535	92.36579021	94.99575058	83.20886624	3056.933459	2301.567039	0.409434357	0.000971243	0.00567117	Ila12G013370	GWHBIST00000012	31901330	31904458	-	3017	protein_coding	- && sp|Q9LVJ1|SBT14_ARATH Subtilisin-like protease SBT1.4 OS=Arabidopsis thaliana OX=3702 GN=SBT1.4 PE=2 SV=1 && PF02225:PA domain|PF00082:Subtilase family|PF17766:Fibronectin type-III domain|PF05922:Peptidase inhibitor I9	Peptidase_S8
Ila09G000770	2496	2539	2936	2821	2962	2475	84.54996046	85.02828045	91.66934485	92.13215159	88.33893969	80.14940515	2681.980874	2688.434095	-0.003525889	0.975862338	0.987187297	Ila09G000770	GWHBIST00000009	742763	759404	-	2748	protein_coding	- && sp|Q39255|SKP1A_ARATH SKP1-like protein 1A OS=Arabidopsis thaliana OX=3702 GN=SKP1A PE=1 SV=1 && PF01466:Skp1 family, dimerisation domain|PF03931:Skp1 family, tetramerisation domain	Skp1
Ila10G009300	2408	2062	2048	3158	3198	3347	132.4773646	112.1516651	103.8518885	167.5084125	154.9037591	176.0342532	3158.269777	2208.05426	0.516440027	0.000211376	0.001538833	Ila10G009300	GWHBIST00000010	15088372	15096446	+	1692	protein_coding	- && sp|Q42593|APXT_ARATH L-ascorbate peroxidase T, chloroplastic OS=Arabidopsis thaliana OX=3702 GN=APXT PE=2 SV=2 && PF00141:Peroxidase	-
Ila17G013010	2367	2246	2416	3738	2766	2679	141.5126297	132.7512329	133.1352696	215.4644079	145.5953215	153.1178878	2998.00367	2375.412801	0.335737194	0.053591963	0.139106331	Ila17G013010	GWHBIST00000017	31072808	31079339	-	1557	protein_coding	- && sp|Q9SCX3|EF1B2_ARATH Elongation factor 1-beta 2 OS=Arabidopsis thaliana OX=3702 GN=At5g19510 PE=1 SV=1 && PF00736:EF-1 guanine nucleotide exchange domain	-
Ila01G001900	2178	1840	1490	3554	3343	3794	89.51075603	74.7596123	56.44206138	140.8231559	120.9628545	149.0633746	3484.827039	1872.084202	0.896579261	1.86E-06	2.62E-05	Ila01G001900	GWHBIST00000001	2032517	2038823	+	2265	protein_coding	- && - && PF00575:S1 RNA binding domain	S1
Ila06G000760	2144	2181	1752	2969	3185	3954	146.1031697	146.9340299	110.044466	195.0672466	191.0920387	257.5892854	3293.042664	2061.930981	0.675511697	0.000176942	0.001324748	Ila06G000760	GWHBIST00000006	803070	806086	-	1366	protein_coding	- && sp|P30155|RK27_TOBAC 50S ribosomal protein L27, chloroplastic OS=Nicotiana tabacum OX=4097 GN=RPL27 PE=1 SV=1 && PF01016:Ribosomal L27 protein	-
Ila16G006820	3214	2947	2899	2405	2625	2081	53.44394822	48.44675194	44.43243619	38.55733798	38.43087477	33.0811817	2307.436996	3067.441408	-0.410600831	0.002115672	0.010769721	Ila16G006820	GWHBIST00000016	10566023	10619290	+	5598	protein_coding	- && sp|Q42093|AB2C_ARATH ABC transporter C family member 2 OS=Arabidopsis thaliana OX=3702 GN=ABCC2 PE=1 SV=2 && PF00664:ABC transporter transmembrane region|PF00005:ABC transporter	ABC_membrane
Ila05G012050	2527	2296	1884	2698	3119	3631	97.88970672	87.92968893	67.26852923	100.7657705	106.376442	134.4665637	3074.065881	2277.485266	0.432816858	0.019219766	0.063855669	Ila05G012050	GWHBIST00000005	28692473	28697339	-	2403	protein_coding	- && - && PF11255:Protein of unknown function (DUF3054)	-
Ila13G005440	2014	2294	2549	3263	3325	2678	88.14091051	99.25293257	102.8222612	137.6811357	128.1173704	112.0430471	3009.591752	2311.635622	0.380575235	0.005002443	0.021918301	Ila13G005440	GWHBIST00000013	6815107	6822047	-	2127	protein_coding	- && sp|Q67ZB3|FRL3_ARATH FRIGIDA-like protein 3 OS=Arabidopsis thaliana OX=3702 GN=FRL3 PE=1 SV=1 && PF07899:Frigida-like protein	-
Ila16G018490	3477	3260	3005	2073	2273	2031	209.6249398	194.3066785	166.9867395	120.4971741	120.6524086	117.0589046	2071.159513	3301.046821	-0.67235215	2.13E-07	3.89E-06	Ila16G018490	GWHBIST00000016	44585007	44587260	+	1544	protein_coding	- && sp|Q10QA5|D14_ORYSJ Strigolactone esterase D14 OS=Oryza sativa subsp. japonica OX=39947 GN=D14 PE=1 SV=1 && PF12697:Alpha/beta hydrolase family	-
Ila06G004770	3628	6435	4181	1099	545	227	170.9959147	299.8464249	181.6343032	49.94079462	22.6158679	10.22823237	612.2778971	4825.723671	-2.978535797	9.10E-06	0.000104795	Ila06G004770	GWHBIST00000006	4550831	4554373	+	1975	protein_coding	- && sp|Q9SZG0|HHP4_ARATH Heptahelical transmembrane protein 4 OS=Arabidopsis thaliana OX=3702 GN=HHP4 PE=2 SV=1 && PF03006:Haemolysin-III related	-
Ila17G005850	2665	2559	3350	2722	2570	2209	114.3202158	108.5245455	132.4554639	112.5779258	97.0637902	90.58948915	2439.753466	2887.258024	-0.243106052	0.092757528	0.2096879	Ila17G005850	GWHBIST00000017	8318786	8344104	-	2170	protein_coding	- && sp|O04057|ASPR_CUCPE Aspartic proteinase OS=Cucurbita pepo OX=3663 PE=2 SV=1 && PF03489:Saposin-like type B, region 2|PF05184:Saposin-like type B, region 1|PF00026:Eukaryotic aspartyl protease	Asp
Ila14G027480	1763	2032	2233	3142	4941	1929	65.46113553	74.59106251	76.42213982	112.4803612	161.5267208	68.47305775	3215.289678	2032.315522	0.661897701	0.01201616	0.044218173	Ila14G027480	GWHBIST00000014	56209735	56214667	-	2507	protein_coding	- && sp|Q03685|BIP5_TOBAC Luminal-binding protein 5 OS=Nicotiana tabacum OX=4097 GN=BIP5 PE=2 SV=1 && PF00012:Hsp70 protein	HSP70
Ila05G009060	2241	3024	4420	1793	2550	2009	44.35600605	59.17308772	80.63657913	34.21607322	44.4374427	38.01428152	2054.737552	3243.501053	-0.658623288	0.002714392	0.013236298	Ila05G009060	GWHBIST00000005	24992060	25000420	+	4703	protein_coding	- && sp|O48947|CESA2_ARATH Cellulose synthase A catalytic subunit 2 [UDP-forming] OS=Arabidopsis thaliana OX=3702 GN=CESA2 PE=1 SV=1 && PF14569:Zinc-binding RING-finger|PF03552:Cellulose synthase	-
Ila17G013720	2527	2834	3661	2131	2841	2032	78.96239182	87.5481083	105.442096	64.20041009	78.16000652	60.70088584	2265.312133	3033.849917	-0.421408108	0.010592618	0.039982261	Ila17G013720	GWHBIST00000017	32773391	32777141	+	2979	protein_coding	- && sp|O24606|EIN3_ARATH Protein ETHYLENE INSENSITIVE 3 OS=Arabidopsis thaliana OX=3702 GN=EIN3 PE=1 SV=1 && PF04873:Ethylene insensitive 3	EIN3
Ila17G016990	2504	2025	1709	3235	3016	3534	180.5483977	144.3498075	113.5796759	224.8914261	191.4648039	243.602719	3190.608699	2119.846005	0.589969808	0.002054415	0.010513289	Ila17G016990	GWHBIST00000017	38666806	38671215	+	1291	protein_coding	- && sp|Q8LAD0|PDX2_ARATH Probable pyridoxal 5'-phosphate synthase subunit PDX2 OS=Arabidopsis thaliana OX=3702 GN=PDX2 PE=1 SV=1 && PF01174:SNO glutamine amidotransferase family	-
Ila05G005050	2425	2637	3011	2946	2654	2313	84.92632328	91.30037829	97.19425239	99.47240577	81.83324978	77.43949011	2575.476358	2721.555224	-0.079725354	0.57726123	0.732018384	Ila05G005050	GWHBIST00000005	18664133	18677507	-	2658	protein_coding	- && - && PF01753:MYND finger	zf-MYND
Ila04G004550	2571	2725	2923	2798	2643	2312	65.46082069	68.59267554	68.59736489	68.68570793	59.24815522	56.27603243	2522.025793	2774.501864	-0.137731317	0.27309744	0.452695907	Ila04G004550	GWHBIST00000004	16189757	16196831	-	3656	protein_coding	- && sp|Q54JE4|ODO1_DICDI 2-oxoglutarate dehydrogenase, mitochondrial OS=Dictyostelium discoideum OX=44689 GN=ogdh PE=3 SV=1 && PF02779:Transketolase, pyrimidine binding domain|PF00676:Dehydrogenase E1 component|PF16078:2-oxoglutarate dehydrogenase N-terminus|PF16870:2-oxoglutarate dehydrogenase C-terminal	-
Ila05G010380	2901	3024	3316	2233	2382	2104	138.697085	142.9332468	146.127978	102.9313402	100.2673789	96.16601339	2182.714671	3118.852147	-0.514930143	6.26E-07	1.00E-05	Ila05G010380	GWHBIST00000005	26525638	26530481	-	1947	protein_coding	- && sp|P93212|14337_SOLLC 14-3-3 protein 7 OS=Solanum lycopersicum OX=4081 GN=TFT7 PE=2 SV=2 && PF00244:14-3-3 protein	-
Ila19G007250	2633	3375	4091	2481	1924	1455	158.8438809	201.2914253	227.4826915	144.3064337	102.1934352	83.91486415	1909.218836	3395.403526	-0.830714889	0.000171516	0.001290795	Ila19G007250	GWHBIST00000019	21727680	21731447	+	1543	protein_coding	- && sp|P17784|ALFC1_ORYSJ Fructose-bisphosphate aldolase 1, cytoplasmic OS=Oryza sativa subsp. japonica OX=39947 GN=FBA1 PE=1 SV=2 && PF00274:Fructose-bisphosphate aldolase class-I	-
Ila13G011330	1121	1238	1677	3862	3871	4166	73.79751863	80.57283764	101.7579755	245.1250615	224.366296	262.1873202	3874.361933	1356.24269	1.514007408	1.14E-21	2.70E-19	Ila13G011330	GWHBIST00000013	24198324	24201883	+	1414	protein_coding	- && sp|P10792|SODCP_PETHY Superoxide dismutase [Cu-Zn], chloroplastic OS=Petunia hybrida OX=4102 GN=SODCP PE=2 SV=1 && PF00080:Copper/zinc superoxide dismutase (SODC)	-
Ila09G001660	2413	2401	2841	2756	3005	2517	67.13004549	66.03643919	72.85009153	73.922753	73.604166	66.94206536	2687.328835	2581.418881	0.057957754	0.610831661	0.757155657	Ila09G001660	GWHBIST00000009	1723161	1743110	+	3346	protein_coding	- && sp|Q9SJT7|VHAA2_ARATH V-type proton ATPase subunit a2 OS=Arabidopsis thaliana OX=3702 GN=VHA-a2 PE=1 SV=1 && PF01496:V-type ATPase 116kDa subunit family	-
Ila14G021300	2756	3329	2341	2085	2688	2705	125.2664636	149.5895538	98.07453689	91.36943991	107.5680185	117.5382298	2427.172738	2860.146635	-0.236689454	0.200763826	0.366599293	Ila14G021300	GWHBIST00000014	48943713	48955467	+	2048	protein_coding	- && sp|Q4R828|RCCD1_MACFA RCC1 domain-containing protein 1 OS=Macaca fascicularis OX=9541 GN=RCCD1 PE=2 SV=1 && PF00415:Regulator of chromosome condensation (RCC1) repeat|PF13540:Regulator of chromosome condensation (RCC1) repeat	-
Ila19G009840	2673	2523	2608	2486	3147	2437	82.20005233	76.70474904	73.92306593	73.70781872	85.20560772	71.64484325	2613.506024	2639.233173	-0.013924526	0.912034413	0.953141116	Ila19G009840	GWHBIST00000019	26089734	26102931	+	3027	protein_coding	- && sp|Q852L0|HD16N_ORYSJ Casein kinase 1-like protein HD16 OS=Oryza sativa subsp. japonica OX=39947 GN=HD16 PE=1 SV=1 && PF00069:Protein kinase domain	Pkinase
Ila19G001260	2430	2112	1744	3057	3051	3462	137.5909967	118.2250549	91.01845768	166.8854527	152.0982618	187.3989179	3117.532543	2135.278346	0.546095525	0.002252304	0.01134568	Ila19G001260	GWHBIST00000019	1834421	1839858	-	1644	protein_coding	- && sp|Q38833|CHLG_ARATH Chlorophyll synthase, chloroplastic OS=Arabidopsis thaliana OX=3702 GN=CHLG PE=2 SV=1 && PF01040:UbiA prenyltransferase family	UbiA
Ila12G009570	2969	2675	3772	2208	2275	1954	222.5226165	198.2072857	260.5762879	159.5520281	150.1217649	140.0054017	2091.48508	3168.796218	-0.599520265	3.48E-05	0.000331813	Ila12G009570	GWHBIST00000012	28629458	28634207	-	1242	protein_coding	- && sp|A7S4N4|SERIC_NEMVE Probable serine incorporator OS=Nematostella vectensis OX=45351 GN=serinc PE=3 SV=1 && PF03348:Serine incorporator (Serinc)	TMS_TDE
Ila01G005490	2344	2330	1877	3016	2992	3290	141.4090607	138.9656358	104.3717947	175.4245079	158.9203524	189.7456378	3028.325771	2223.161302	0.446011559	0.005450831	0.023439988	Ila01G005490	GWHBIST00000001	6095229	6101079	-	1543	protein_coding	- && sp|Q9ZP40|PG1_PEA Plastoglobulin-1, chloroplastic OS=Pisum sativum OX=3888 GN=PG1 PE=1 SV=1 && PF04755:PAP_fibrillin	-
Ila07G009490	2955	3443	3025	2143	2332	1948	84.17071058	96.95548846	79.41968054	58.85250853	58.4830959	53.04552271	2085.133737	3188.575006	-0.612664072	2.62E-06	3.53E-05	Ila07G009490	GWHBIST00000007	24004914	24016661	-	3268	protein_coding	- && sp|Q94A41|AMY3_ARATH Alpha-amylase 3, chloroplastic OS=Arabidopsis thaliana OX=3702 GN=AMY3 PE=1 SV=1 && PF07821:Alpha-amylase C-terminal beta-sheet domain|PF00128:Alpha amylase, catalytic domain	-
Ila08G008370	3019	3288	3752	1978	2059	1699	65.783568	70.83012181	75.35574891	41.55467586	39.50107901	35.39190695	1862.912243	3391.055316	-0.864225987	5.28E-12	2.76E-10	Ila08G008370	GWHBIST00000008	24684844	24713794	-	4272	protein_coding	- && sp|Q9M8Y0|SEC_ARATH Probable UDP-N-acetylglucosamine--peptide N-acetylglucosaminyltransferase SEC OS=Arabidopsis thaliana OX=3702 GN=SEC PE=1 SV=1 && -	-
Ila16G002030	1608	1764	1550	2773	3660	4433	96.32091204	104.4636004	85.57866126	160.1488081	193.0251628	253.8566505	3532.579905	1666.474075	1.083995129	9.51E-09	2.39E-07	Ila16G002030	GWHBIST00000016	2251819	2254238	+	1554	protein_coding	- && sp|P12301|PSBQ_SPIOL Oxygen-evolving enhancer protein 3, chloroplastic OS=Spinacia oleracea OX=3562 GN=PSBQ PE=1 SV=1 && PF05757:Oxygen evolving enhancer protein 3 (PsbQ)	-
Ila09G000090	2602	2576	2096	2759	2702	3041	94.79860444	92.78384759	70.38582064	96.91380649	86.6718959	105.917408	2769.966514	2468.241104	0.166454338	0.302598022	0.484252905	Ila09G000090	GWHBIST00000009	202107	210401	-	2555	protein_coding	- && sp|Q43794|SYE_TOBAC Glutamate--tRNA ligase, chloroplastic/mitochondrial OS=Nicotiana tabacum OX=4097 PE=2 SV=1 && -	-
Ila07G011040	2447	3492	4555	2584	1669	1011	144.6235333	204.0380201	248.1376288	147.2437288	86.84796267	57.12318655	1717.609753	3519.971586	-1.035254244	0.000819061	0.004901047	Ila07G011040	GWHBIST00000007	25672289	25675536	+	1575	protein_coding	- && sp|Q9FX54|G3PC2_ARATH Glyceraldehyde-3-phosphate dehydrogenase GAPC2, cytosolic OS=Arabidopsis thaliana OX=3702 GN=GAPC2 PE=1 SV=1 && PF00044:Glyceraldehyde 3-phosphate dehydrogenase, NAD binding domain|PF02800:Glyceraldehyde 3-phosphate dehydrogenase, C-terminal domain	-
Ila06G013520	2430	3070	3648	2178	2046	2298	31.09700283	38.84029346	43.02950376	26.87258433	23.05240225	28.11373561	2125.758022	3077.191357	-0.533845657	0.001035896	0.005989857	Ila06G013520	GWHBIST00000006	21905833	21917374	-	7274	protein_coding	- && sp|F4IIM1|CSI1_ARATH Protein CELLULOSE SYNTHASE INTERACTIVE 1 OS=Arabidopsis thaliana OX=3702 GN=CSI1 PE=1 SV=1 && PF00168:C2 domain	C2
Ila19G009300	2537	2409	2729	2828	2749	2418	56.16167129	52.72155653	55.68296343	60.35847531	53.57875233	51.17196863	2599.965851	2591.415179	0.004686267	0.968780063	0.983283139	Ila19G009300	GWHBIST00000019	25320678	25342335	-	4205	protein_coding	- && sp|Q9FPT1|UBP12_ARATH Ubiquitin C-terminal hydrolase 12 OS=Arabidopsis thaliana OX=3702 GN=UBP12 PE=1 SV=2 && PF12436:ICP0-binding domain of Ubiquitin-specific protease 7|PF14533:Ubiquitin-specific protease C-terminal|PF00443:Ubiquitin carboxyl-terminal hydrolase|PF00917:MATH domain	UCH
Ila0G019470	2541	2636	2740	2782	2463	2494	181.2507071	185.8884123	180.1460964	191.3248889	154.6812798	170.0700213	2522.055937	2674.573938	-0.084845167	0.500619351	0.669150892	Ila0G019470	GWHBIST00000334	97378	98916	+	1305	protein_coding	- && sp|P17786|EF1A_SOLLC Elongation factor 1-alpha OS=Solanum lycopersicum OX=4081 PE=2 SV=1 && PF00009:Elongation factor Tu GTP binding domain|PF03143:Elongation factor Tu C-terminal domain|PF03144:Elongation factor Tu domain 2	GTP_EFTU
Ila18G001380	2619	2749	2961	2227	2911	2178	32.92274148	34.16387316	34.30821707	26.99106431	32.21817966	26.1742738	2367.715334	2811.714768	-0.247790385	0.054779171	0.141490992	Ila18G001380	GWHBIST00000018	1458703	1472463	-	7405	protein_coding	- && sp|Q6EVK6|BRM_ARATH ATP-dependent helicase BRM OS=Arabidopsis thaliana OX=3702 GN=BRM PE=1 SV=1 && PF00176:SNF2 family N-terminal domain|PF08880:QLQ|PF00271:Helicase conserved C-terminal domain	SNF2_N
Ila08G005870	2742	2876	3209	2130	2634	2010	154.6924303	160.4066472	166.8670459	115.8565295	130.8325129	108.4061552	2194.11367	2978.042134	-0.440604377	0.00037801	0.002526641	Ila08G005870	GWHBIST00000008	16736503	16742291	-	1650	protein_coding	- && sp|P22337|STAD_RICCO Stearoyl-[acyl-carrier-protein] 9-desaturase, chloroplastic OS=Ricinus communis OX=3988 PE=1 SV=1 && PF03405:Fatty acid desaturase	-
Ila06G004110	2867	2997	2788	2338	2446	2162	31.21748647	32.26181895	27.98093722	24.54449186	23.44903593	22.50516499	2256.975068	2928.04702	-0.375459711	0.001386781	0.007594539	Ila06G004110	GWHBIST00000006	3900110	3910881	+	8549	protein_coding	- && - && -	-
Ila17G009760	2366	2360	1716	2932	2863	3347	135.7006027	133.8168822	90.71593233	162.1325831	144.5728307	183.5181494	2979.497892	2189.439243	0.444610665	0.01803138	0.060625017	Ila17G009760	GWHBIST00000017	15564059	15592826	-	1623	protein_coding	- && - && PF08241:Methyltransferase domain	Methyltransf_11
Ila09G004600	2459	2535	1848	2657	2908	3159	71.4862898	72.8574656	49.51826777	74.47235415	74.43152737	87.79506949	2838.232973	2324.579742	0.288150354	0.108481698	0.234993006	Ila09G004600	GWHBIST00000009	5129733	5157655	-	3202	protein_coding	- && sp|Q9M0Z3|KEA3_ARATH K(+) efflux antiporter 3, chloroplastic OS=Arabidopsis thaliana OX=3702 GN=KEA3 PE=1 SV=2 && PF02254:TrkA-N domain|PF00999:Sodium/hydrogen exchanger family	Na_H_Exchanger
Ila19G000360	2290	2285	1897	2899	2742	3449	64.12982037	63.26195561	48.9656045	78.27301378	67.60678624	92.33662739	2965.262208	2195.255303	0.43381278	0.011815839	0.043636141	Ila19G000360	GWHBIST00000019	612773	619281	+	3324	protein_coding	- && sp|Q9SCU5|WNK5_ARATH Probable serine/threonine-protein kinase WNK5 OS=Arabidopsis thaliana OX=3702 GN=WNK5 PE=1 SV=2 && PF00069:Protein kinase domain	Pkinase
Ila11G009270	2375	2035	2267	3338	2580	2951	96.75267158	81.95880791	85.12362707	131.1067294	92.53741383	114.9277313	2897.126528	2257.611289	0.359728175	0.02761541	0.084463595	Ila11G009270	GWHBIST00000011	26730049	26733304	-	2285	protein_coding	- && sp|Q8VYW2|BAM9_ARATH Inactive beta-amylase 9 OS=Arabidopsis thaliana OX=3702 GN=BAM9 PE=2 SV=1 && PF01373:Glycosyl hydrolase family 14	-
Ila02G003510	2290	2874	3538	1962	2681	2195	93.741215	116.3091086	133.4910573	77.43430387	96.62515643	85.89856186	2213.727014	2925.498621	-0.402210115	0.017391558	0.058990352	Ila02G003510	GWHBIST00000002	11652477	11686135	+	2274	protein_coding	- && sp|Q9LU40|MSR1_ARATH Protein MANNAN SYNTHESIS-RELATED 1 OS=Arabidopsis thaliana OX=3702 GN=MSR1 PE=2 SV=1 && PF10250:GDP-fucose protein O-fucosyltransferase	-
Ila10G004220	3440	3540	3499	1734	1606	1673	105.0579776	106.8822834	98.49490927	51.05743419	43.18316152	48.84530287	1633.210556	3543.368018	-1.117585493	3.40E-20	6.68E-18	Ila10G004220	GWHBIST00000010	4421783	4428898	-	3048	protein_coding	- && sp|Q37145|ACA1_ARATH Calcium-transporting ATPase 1 OS=Arabidopsis thaliana OX=3702 GN=ACA1 PE=1 SV=3 && PF12515:Ca2+-ATPase N terminal autoinhibitory domain|PF00702:haloacid dehalogenase-like hydrolase|PF00122:E1-E2 ATPase|PF00689:Cation transporting ATPase, C-terminus|PF00690:Cation transporter/ATPase, N-terminus|PF13246:Cation transport ATPase (P-type)	E1-E2_ATPase
Ila01G008300	2726	2465	2374	2626	2691	2562	37.8622993	33.8477593	30.39212703	35.16536698	32.90736669	34.01860735	2562.263042	2562.535217	-6.03E-05	0.99962659	0.999922602	Ila01G008300	GWHBIST00000001	10569655	10610624	+	6702	protein_coding	- && sp|F4ISL7|TI236_ARATH Protein TIC236, chloroplastic OS=Arabidopsis thaliana OX=3702 GN=TIC236 PE=1 SV=1 && PF04357:TamB, inner membrane protein subunit of TAM complex	-
Ila03G005450	2470	2413	2686	2798	2754	2315	52.41008633	50.61824824	52.53190843	57.24069939	51.44938146	46.95968657	2557.092808	2555.622056	0.000790004	0.994890464	0.997946236	Ila03G005450	GWHBIST00000003	11053802	11058402	+	4387	protein_coding	- && sp|O57683|SF3B1_XENLA Splicing factor 3B subunit 1 OS=Xenopus laevis OX=8355 GN=sf3b1 PE=2 SV=1 && PF08920:Splicing factor 3B subunit 1	-
Ila09G012370	1289	1302	1037	3441	4043	4324	47.72799607	47.66099829	35.39144442	122.8412579	131.8020983	153.0601873	3838.310816	1231.227888	1.640639129	6.92E-23	1.93E-20	Ila09G012370	GWHBIST00000009	27987258	28007991	-	2514	protein_coding	- && sp|O24133|CHLD_TOBAC Magnesium-chelatase subunit ChlD, chloroplastic OS=Nicotiana tabacum OX=4097 GN=CHLD PE=2 SV=1 && PF01078:Magnesium chelatase, subunit ChlI|PF17863:AAA lid domain|PF13519:von Willebrand factor type A domain	-
Ila12G011320	2201	2121	1890	2801	2941	3482	118.9795855	113.3508928	94.17019327	145.9838515	139.9734715	179.9440323	3004.398256	2105.462964	0.513006609	0.001157332	0.006546732	Ila12G011320	GWHBIST00000012	30044254	30048847	+	1722	protein_coding	- && sp|Q944I4|GLYK_ARATH D-glycerate 3-kinase, chloroplastic OS=Arabidopsis thaliana OX=3702 GN=GLYK PE=1 SV=2 && -	-
Ila04G004590	2595	2559	2644	2293	2597	2738	231.3781902	225.5730496	217.2930104	197.1189657	203.8709316	233.3859855	2480.147688	2636.016538	-0.087928786	0.467489727	0.640264873	Ila04G004590	GWHBIST00000004	16249488	16253963	+	1044	protein_coding	- && sp|Q9FVI1|ADF2_PETHY Actin-depolymerizing factor 2 OS=Petunia hybrida OX=4102 GN=ADF2 PE=2 SV=1 && PF00241:Cofilin/tropomyosin-type actin-binding protein	Cofilin_ADF
Ila18G013540	1986	1965	1767	3186	2983	3538	85.46893275	83.60330746	70.09141616	132.1947195	113.0265809	145.5603656	3165.345204	1937.234007	0.708405824	2.67E-06	3.58E-05	Ila18G013540	GWHBIST00000018	34035525	34057934	+	2163	protein_coding	- && - && PF11891:Protein RETICULATA-related	-
Ila05G016750	2339	2145	2055	2871	2949	3051	82.59815986	74.88577253	66.88846429	97.74907184	91.68815275	103.0003334	2886.748407	2214.85456	0.38232025	0.003540432	0.016494271	Ila05G016750	GWHBIST00000005	33387311	33403628	-	2636	protein_coding	- && sp|Q9MA15|AB1K3_ARATH Protein ACTIVITY OF BC1 COMPLEX KINASE 3, chloroplastic OS=Arabidopsis thaliana OX=3702 GN=ABC1K3 PE=1 SV=1 && PF03109:ABC1 family	ABC1
Ila17G001270	1658	1574	1256	3089	3348	4483	147.5497228	138.4810881	103.0250323	265.0397904	262.3237555	381.3984141	3559.690212	1523.961541	1.224050232	1.71E-09	5.15E-08	Ila17G001270	GWHBIST00000017	1399608	1402997	+	1046	protein_coding	- && sp|Q9M4Y3|RR10_MESCR 30S ribosomal protein S10, chloroplastic OS=Mesembryanthemum crystallinum OX=3544 GN=RPS10 PE=2 SV=1 && PF00338:Ribosomal protein S10p/S20e	Ribosomal_S10
Ila12G013110	2293	2477	2382	2736	2835	2672	69.73106229	74.46978514	66.76721053	80.21906933	75.90556024	77.68102595	2680.08595	2418.301331	0.148316377	0.173276062	0.330570351	Ila12G013110	GWHBIST00000012	31616351	31625166	-	3061	protein_coding	- && sp|Q9FNA9|PDAT1_ARATH Phospholipid:diacylglycerol acyltransferase 1 OS=Arabidopsis thaliana OX=3702 GN=PDAT1 PE=2 SV=1 && PF02450:Lecithin:cholesterol acyltransferase	-
Ila18G018330	2642	2994	2939	2190	2641	1981	130.3997267	146.092369	133.7034773	104.2142919	114.7652928	93.47266299	2206.763144	2897.097008	-0.392520063	0.002620342	0.012875158	Ila18G018330	GWHBIST00000018	39718309	39728987	+	1886	protein_coding	- && sp|O48666|SQS1_PANGI Squalene synthase 1 OS=Panax ginseng OX=4054 GN=SS1 PE=2 SV=1 && PF00494:Squalene/phytoene synthase	-
Ila06G003180	2963	3045	3194	2055	2291	1803	111.8016101	113.5888156	111.0837589	74.75969699	76.1096625	65.03818392	1994.65296	3108.502917	-0.639970506	4.93E-08	1.05E-06	Ila06G003180	GWHBIST00000006	3072805	3081130	-	2467	protein_coding	- && sp|Q0WML0|AB27B_ARATH ABC transporter B family member 27 OS=Arabidopsis thaliana OX=3702 GN=ABCB27 PE=1 SV=1 && PF00005:ABC transporter|PF00664:ABC transporter transmembrane region	ABC_membrane
Ila18G011340	3402	3126	3191	2354	1817	1451	208.2047587	189.1372993	180.004099	138.8999534	97.90605908	84.89459229	1832.362823	3288.485064	-0.843778845	1.36E-05	0.000146465	Ila18G011340	GWHBIST00000018	29396303	29400999	+	1521	protein_coding	- && sp|O65390|APA1_ARATH Aspartic proteinase A1 OS=Arabidopsis thaliana OX=3702 GN=APA1 PE=1 SV=1 && PF05184:Saposin-like type B, region 1|PF00026:Eukaryotic aspartyl protease|PF03489:Saposin-like type B, region 2	Asp
Ila14G006830	1791	3054	3303	2872	2230	2079	106.4607164	179.471172	180.9679308	164.5953393	116.7070151	118.1420657	2342.494052	2738.078176	-0.225249979	0.330587144	0.514406422	Ila14G006830	GWHBIST00000014	9490495	9492060	-	1566	protein_coding	- && sp|Q8W3M4|Y4744_ARATH Uncharacterized protein At4g06744 OS=Arabidopsis thaliana OX=3702 GN=At4g06744 PE=2 SV=1 && -	-
Ila14G014210	2984	2605	3950	2682	1710	1381	134.5130187	116.0927491	164.120127	116.5637668	67.86719671	59.51349441	1886.433031	3207.09326	-0.765742984	0.002373708	0.011854228	Ila14G014210	GWHBIST00000014	32342227	32350198	-	2065	protein_coding	- && sp|Q9SBQ9|F3PH_PETHY Flavonoid 3'-monooxygenase OS=Petunia hybrida OX=4102 GN=CYP75B2 PE=2 SV=1 && PF00067:Cytochrome P450	p450
Ila06G000640	1955	1938	2138	3121	2994	3150	145.2383301	142.3377595	146.4001206	223.5463346	195.8324158	223.7181974	3017.573796	2036.326318	0.567278447	7.66E-07	1.20E-05	Ila06G000640	GWHBIST00000006	716878	719679	+	1253	protein_coding	- && sp|P35685|RL7A1_ORYSJ 60S ribosomal protein L7a-1 OS=Oryza sativa subsp. japonica OX=39947 GN=RPL7A-1 PE=2 SV=1 && PF01248:Ribosomal protein L7Ae/L30e/S12e/Gadd45 family	-
Ila04G007000	1313	1370	1171	3430	3458	4531	79.72749656	82.24241149	65.5389599	200.8060628	184.8701061	263.0230054	3724.053233	1306.083264	1.511728233	8.29E-18	1.15E-15	Ila04G007000	GWHBIST00000004	19346514	19353025	+	1533	protein_coding	- && sp|Q42967|DCUP_TOBAC Uroporphyrinogen decarboxylase, chloroplastic OS=Nicotiana tabacum OX=4097 GN=DCUP PE=1 SV=1 && PF01208:Uroporphyrinogen decarboxylase (URO-D)	-
Ila01G003960	2308	2060	1579	3098	2848	3378	160.3306534	141.4750467	101.1025563	207.4920544	174.188325	224.3348137	3041.015901	2021.81468	0.589008651	0.002406684	0.011982777	Ila01G003960	GWHBIST00000001	4270403	4273936	+	1340	protein_coding	- && sp|Q8W463|RK191_ARATH 50S ribosomal protein L19-1, chloroplastic OS=Arabidopsis thaliana OX=3702 GN=At4g17560 PE=2 SV=1 && PF01245:Ribosomal protein L19	-
Ila16G015550	2489	2496	2097	2745	2564	2813	123.9655899	122.9002322	96.26622325	131.8128964	112.4326834	133.9375219	2646.926007	2401.601581	0.140367911	0.357866709	0.541317462	Ila16G015550	GWHBIST00000016	40626234	40630196	+	1869	protein_coding	- && sp|Q8S9D1|PP395_ARATH Pentatricopeptide repeat-containing protein At5g21222 OS=Arabidopsis thaliana OX=3702 GN=ATC401 PE=2 SV=1 && PF13041:PPR repeat family	-
Ila14G001950	2638	2514	2504	2434	2775	2320	104.8064616	98.7439301	91.69525036	93.23374753	97.06765889	88.11655809	2442.867563	2590.515319	-0.084485158	0.467574778	0.640305716	Ila14G001950	GWHBIST00000014	2159049	2168689	+	2343	protein_coding	- && sp|Q9M7J9|POT8_ARATH Potassium transporter 8 OS=Arabidopsis thaliana OX=3702 GN=POT8 PE=2 SV=2 && PF02705:K+ potassium transporter	K_trans
Ila15G018860	2317	2380	2667	2923	2829	2044	101.0688153	102.6360585	107.2292838	122.930389	108.6481633	85.23702926	2531.811267	2484.810247	0.027014556	0.865581793	0.927032103	Ila15G018860	GWHBIST00000015	49567496	49571302	-	2134	protein_coding	- && sp|P22895|P34_SOYBN P34 probable thiol protease OS=Glycine max OX=3847 PE=1 SV=1 && PF00396:Granulin|PF00112:Papain family cysteine protease|PF08246:Cathepsin propeptide inhibitor domain (I29)	Peptidase_C1
Ila19G004200	2178	2415	2167	2561	2851	2979	55.33347773	60.65674398	50.7444151	62.73053179	63.77134969	72.35305392	2728.489077	2287.766378	0.254228713	0.051678171	0.135396808	Ila19G004200	GWHBIST00000019	7021458	7047058	-	3664	protein_coding	- && sp|C0LGI2|Y1677_ARATH Probable LRR receptor-like serine/threonine-protein kinase At1g67720 OS=Arabidopsis thaliana OX=3702 GN=At1g67720 PE=1 SV=1 && PF12819:Malectin-like domain|PF07714:Protein tyrosine kinase|PF13855:Leucine rich repeat	Pkinase_Tyr
Ila06G007850	2595	2536	2579	2433	2515	2473	40.86598385	39.48259724	37.43477158	36.94077524	34.87071774	37.23102438	2413.721777	2607.20543	-0.111242093	0.300694016	0.48219814	Ila06G007850	GWHBIST00000006	8070902	8078433	-	5911	protein_coding	- && sp|Q7TMK9|HNRPQ_MOUSE Heterogeneous nuclear ribonucleoprotein Q OS=Mus musculus OX=10090 GN=Syncrip PE=1 SV=2 && PF00076:RNA recognition motif. (a.k.a. RRM, RBD, or RNP domain)	RRM_1
Ila16G012660	2492	2385	2455	2588	2687	2521	34.72099182	32.85219072	31.52788439	34.76543405	32.96173406	33.57942093	2534.600669	2479.420469	0.031795246	0.766589962	0.864941684	Ila16G012660	GWHBIST00000016	35041059	35074328	-	6681	protein_coding	- && sp|F4IAT2|THOC2_ARATH THO complex subunit 2 OS=Arabidopsis thaliana OX=3702 GN=THO2 PE=1 SV=1 && PF11732:Transcription- and export-related complex subunit|PF16134:THO complex subunit 2 N-terminus|PF11262:Transcription factor/nuclear export subunit protein 2	-
Ila05G015850	2819	2579	2582	2288	2728	2118	42.34470737	38.29898547	35.74864181	33.13594645	36.07835489	30.41489267	2312.056769	2701.072592	-0.224146952	0.088069665	0.201735992	Ila05G015850	GWHBIST00000005	32534431	32542854	+	6197	protein_coding	- && sp|P18616|NRPB1_ARATH DNA-directed RNA polymerase II subunit RPB1 OS=Arabidopsis thaliana OX=3702 GN=NRPB1 PE=1 SV=3 && PF04983:RNA polymerase Rpb1, domain 3|PF04997:RNA polymerase Rpb1, domain 1|PF05000:RNA polymerase Rpb1, domain 4|PF04998:RNA polymerase Rpb1, domain 5|PF00623:RNA polymerase Rpb1, domain 2|PF04990:RNA polymerase Rpb1, domain 7|PF04992:RNA polymerase Rpb1, domain 6	-
Ila05G005650	2309	3140	3287	2651	1977	1748	105.2576698	141.5113696	138.1111594	116.5141968	79.34778136	76.1776409	2080.263151	2943.145184	-0.500729139	0.013852321	0.049285525	Ila05G005650	GWHBIST00000005	19295250	19301327	-	2042	protein_coding	- && sp|P42056|VDAC2_SOLTU Mitochondrial outer membrane protein porin of 36 kDa OS=Solanum tuberosum OX=4113 PE=1 SV=2 && PF01459:Eukaryotic porin	-
Ila16G000240	2322	2297	2229	2708	2891	2629	37.56452608	36.73741223	33.23724479	42.23803038	41.1777005	40.659549	2673.532707	2317.218414	0.206474478	0.062879192	0.157109895	Ila16G000240	GWHBIST00000016	237976	261005	-	5754	protein_coding	- && sp|Q04264|PDS5_YEAST Sister chromatid cohesion protein PDS5 OS=Saccharomyces cerevisiae (strain ATCC 204508 / S288c) OX=559292 GN=PDS5 PE=1 SV=1 && -	-
Ila20G008610	2877	2660	2683	2415	2483	1898	73.95999844	67.60371086	63.57362159	59.85679596	56.19944816	46.64547413	2206.231315	2781.657183	-0.334262616	0.019731016	0.065236426	Ila20G008610	GWHBIST00000020	10077407	10087185	+	3621	protein_coding	- && sp|P49608|ACOC_CUCMA Aconitate hydratase, cytoplasmic OS=Cucurbita maxima OX=3661 PE=2 SV=1 && PF00330:Aconitase family (aconitate hydratase)|PF00694:Aconitase C-terminal domain	Aconitase
Ila12G013840	2166	2125	1911	2864	2804	3138	121.3876143	117.7353084	98.71334287	154.7491374	138.3541636	168.1222275	2868.886388	2101.388158	0.44920509	0.001641834	0.008723465	Ila12G013840	GWHBIST00000012	32555304	32565374	+	1661	protein_coding	- && - && PF01852:START domain	START
Ila08G009030	2447	3118	3603	1772	2332	1729	117.8996195	148.5205034	160.0080913	82.31546791	98.92482267	79.63971547	1887.462354	3085.200791	-0.708855894	1.55E-05	0.000164438	Ila08G009030	GWHBIST00000008	26766963	26768894	+	1932	protein_coding	- && sp|Q9LIS3|GAE6_ARATH UDP-glucuronate 4-epimerase 6 OS=Arabidopsis thaliana OX=3702 GN=GAE6 PE=1 SV=1 && PF16363:GDP-mannose 4,6 dehydratase	-
Ila05G010130	3522	3158	3867	1415	1345	1688	156.2677734	138.5236944	158.1442817	60.53071609	52.54128098	71.59930175	1450.892607	3558.545018	-1.294593872	2.24E-17	2.92E-15	Ila05G010130	GWHBIST00000005	26239859	26248378	+	2098	protein_coding	- && sp|Q9Y7K5|YGI3_SCHPO Uncharacterized WD repeat-containing protein C2A9.03 OS=Schizosaccharomyces pombe (strain 972 / ATCC 24843) OX=284812 GN=SPBC2A9.03 PE=4 SV=2 && -	-
Ila15G008650	1840	2038	2515	2658	3246	2638	43.48278963	47.61410471	54.78186499	60.56111348	67.53771936	59.59785634	2768.681337	2151.8323	0.363552007	0.008226811	0.032585425	Ila15G008650	GWHBIST00000015	11176479	11186413	+	3939	protein_coding	- && sp|O48946|CESA1_ARATH Cellulose synthase A catalytic subunit 1 [UDP-forming] OS=Arabidopsis thaliana OX=3702 GN=CESA1 PE=1 SV=1 && PF03552:Cellulose synthase|PF14569:Zinc-binding RING-finger	-
Ila10G001700	2918	3039	3395	1486	1840	2212	268.9363275	276.9024192	288.4052817	132.0451005	149.3070469	194.8971899	1801.300371	3155.330538	-0.808818786	1.22E-06	1.81E-05	Ila10G001700	GWHBIST00000010	1585654	1587244	+	1010	protein_coding	- && sp|P59169|H33_ARATH Histone H3.3 OS=Arabidopsis thaliana OX=3702 GN=HTR4 PE=1 SV=2 && PF00125:Core histone H2A/H2B/H3/H4	Histone
Ila07G002780	2947	3428	3569	3000	1157	762	188.2808457	216.5203325	210.170521	184.7934437	65.08151642	46.54116478	1617.30436	3355.405887	-1.052940305	0.072715147	0.17481038	Ila07G002780	GWHBIST00000007	13009824	13018437	-	1457	protein_coding	- && sp|Q8VYZ2|PPA8_ARATH Purple acid phosphatase 8 OS=Arabidopsis thaliana OX=3702 GN=PAP8 PE=2 SV=1 && PF00149:Calcineurin-like phosphoesterase	Metallophos
Ila05G006770	2497	2382	1819	2502	2655	3004	200.8957456	189.4636161	134.8913636	194.0791145	188.0680506	231.0512902	2656.83627	2275.780647	0.223460494	0.219409997	0.389754048	Ila05G006770	GWHBIST00000005	21334238	21337701	+	1157	protein_coding	- && sp|P82163|RR13_SPIOL 30S ribosomal protein S13, chloroplastic OS=Spinacia oleracea OX=3562 GN=RPS13 PE=1 SV=3 && PF00416:Ribosomal protein S13/S18	-
Ila12G011120	2132	2070	2664	2803	2854	2315	118.4835192	113.729455	136.4596377	150.1872766	139.6442358	122.9923254	2589.464483	2312.523035	0.163070083	0.241681621	0.416582794	Ila12G011120	GWHBIST00000012	29861074	29865803	-	1675	protein_coding	- && sp|Q9C5U3|PRS8A_ARATH 26S proteasome regulatory subunit 8 homolog A OS=Arabidopsis thaliana OX=3702 GN=RPT6A PE=1 SV=1 && PF00004:ATPase family associated with various cellular activities (AAA)|PF16450:Proteasomal ATPase OB C-terminal domain|PF17862:AAA+ lid domain	AAA
Ila14G002120	2636	2604	2931	2106	2512	2040	40.05474486	39.11842955	41.05098957	30.85362737	33.60674874	29.63432255	2158.601769	2758.03097	-0.353431761	0.00153138	0.008255781	Ila14G002120	GWHBIST00000014	2332479	2340435	-	6126	protein_coding	- && - && PF01426:BAH domain|PF08711:TFIIS helical bundle-like domain	BAH
Ila14G001620	2539	2448	2067	2414	2322	3025	133.3028766	127.0632916	100.0268392	122.194986	107.3340054	151.8303076	2532.056875	2392.849983	0.081594224	0.649492515	0.786687073	Ila14G001620	GWHBIST00000014	1840891	1845432	+	1773	protein_coding	- && sp|Q9LK94|MDAR4_ARATH Monodehydroascorbate reductase 4, peroxisomal OS=Arabidopsis thaliana OX=3702 GN=MDAR4 PE=1 SV=1 && PF07992:Pyridine nucleotide-disulphide oxidoreductase	Pyr_redox_2
Ila13G007160	2122	2097	1925	2909	3066	2695	67.37006554	65.81909224	56.3315333	89.04398976	85.7022139	81.79685995	2816.790991	2080.898886	0.437013363	0.000478825	0.003102994	Ila13G007160	GWHBIST00000013	14154486	14159425	+	2932	protein_coding	- && sp|Q9LJE5|ECT2_ARATH YTH domain-containing protein ECT2 OS=Arabidopsis thaliana OX=3702 GN=ECT2 PE=1 SV=1 && PF04146:YT521-B-like domain	YTH
Ila05G016600	2162	2261	2559	2736	2695	2390	27.93621354	28.8831318	30.47764362	34.08530972	30.65977206	29.52337653	2543.14129	2355.067443	0.110716408	0.348378858	0.531883961	Ila05G016600	GWHBIST00000005	33145250	33155757	-	7204	protein_coding	- && sp|Q9SYP1|DEXHC_ARATH DExH-box ATP-dependent RNA helicase DExH12 OS=Arabidopsis thaliana OX=3702 GN=BRR2A PE=1 SV=1 && PF02889:Sec63 Brl domain|PF00270:DEAD/DEAH box helicase|PF18149:N-terminal helicase PWI domain|PF00271:Helicase conserved C-terminal domain	Sec63
Ila05G011060	2151	2119	2245	2681	2898	2656	157.0419871	152.9460255	151.0744303	188.7172003	186.2824979	185.3786497	2675.604462	2201.406843	0.281475248	0.004772532	0.021086263	Ila05G011060	GWHBIST00000005	27300585	27304123	-	1275	protein_coding	- && sp|P93207|14310_SOLLC 14-3-3 protein 10 OS=Solanum lycopersicum OX=4081 GN=TFT10 PE=2 SV=2 && PF00244:14-3-3 protein	-
Ila09G000330	1909	1678	1397	2999	3244	3507	144.8261287	125.8533608	97.68697201	219.3596572	216.6806547	254.3507554	3172.269726	1692.602685	0.906458357	1.48E-07	2.81E-06	Ila09G000330	GWHBIST00000009	421782	425090	+	1227	protein_coding	- && sp|O65502|HC244_ARATH Protein HIGH CHLOROPHYLL FLUORESCENCE PHENOTYPE 244, chloroplastic OS=Arabidopsis thaliana OX=3702 GN=HCF244 PE=1 SV=1 && PF05368:NmrA-like family	NmrA
Ila04G010750	2028	1942	1987	2758	2867	3106	175.4450969	166.0941659	158.4420309	230.0418472	218.3731697	256.8804236	2841.932299	2014.635153	0.496357086	5.06E-05	0.000456353	Ila04G010750	GWHBIST00000004	22870307	22872899	+	1076	protein_coding	- && sp|Q94JX9|NACA2_ARATH Nascent polypeptide-associated complex subunit alpha-like protein 2 OS=Arabidopsis thaliana OX=3702 GN=At3g49470 PE=2 SV=2 && PF01849:NAC domain	-
Ila16G001480	2141	1902	1613	3004	2967	3053	87.95131112	77.24458262	61.07440807	118.9775108	107.3103218	119.8971134	2937.639264	1920.073448	0.613646259	0.000154695	0.001183022	Ila16G001480	GWHBIST00000016	1472124	1475479	-	2266	protein_coding	- && sp|Q9ZS97|AB8I_ARATH UPF0051 protein ABCI8, chloroplastic OS=Arabidopsis thaliana OX=3702 GN=ABCI8 PE=2 SV=1 && PF01458:Uncharacterized protein family (UPF0051)	-
Ila16G018330	2443	2465	2611	2496	2409	2256	92.06871249	91.84116713	90.69737615	90.69273176	79.93255647	81.2800516	2330.047139	2540.032899	-0.124575761	0.265225944	0.444028445	Ila16G018330	GWHBIST00000016	44356970	44364995	+	2470	protein_coding	- && sp|Q9SW96|SYNC1_ARATH Asparagine--tRNA ligase, cytoplasmic 1 OS=Arabidopsis thaliana OX=3702 GN=SYNC1 PE=1 SV=1 && PF00152:tRNA synthetases class II (D, K and N)|PF01336:OB-fold nucleic acid binding domain	tRNA-synt_2
Ila07G004640	2757	3027	3000	2747	1550	1594	111.0509752	120.5396426	111.379718	106.6801382	54.9687181	61.38046867	1930.155487	2968.157105	-0.62099458	0.008672501	0.033985609	Ila07G004640	GWHBIST00000007	17649466	17668622	-	2311	protein_coding	- && sp|Q9ZSQ4|PGMC_POPTN Phosphoglucomutase, cytoplasmic OS=Populus tremula OX=113636 GN=PGM1 PE=2 SV=1 && PF02879:Phosphoglucomutase/phosphomannomutase, alpha/beta/alpha domain II|PF00408:Phosphoglucomutase/phosphomannomutase, C-terminal domain|PF02880:Phosphoglucomutase/phosphomannomutase, alpha/beta/alpha domain III|PF02878:Phosphoglucomutase/phosphomannomutase, alpha/beta/alpha domain I	PGM_PMM_III
Ila09G008920	2260	2320	2435	2198	2863	2587	90.52277766	91.86906259	89.89750664	84.88215952	100.9645888	99.06086903	2479.536837	2369.720657	0.065473943	0.589066319	0.740990655	Ila09G008920	GWHBIST00000009	17225267	17233595	+	2324	protein_coding	- && sp|P43288|KSG1_ARATH Shaggy-related protein kinase alpha OS=Arabidopsis thaliana OX=3702 GN=ASK1 PE=1 SV=3 && PF00069:Protein kinase domain	Pkinase
Ila07G001090	2107	2133	2072	2738	2888	2713	86.89975114	86.97145189	78.76676275	108.8746421	104.8695698	106.969524	2710.687794	2135.308138	0.344308921	0.0015234	0.008218492	Ila07G001090	GWHBIST00000007	7361587	7377558	-	2257	protein_coding	- && sp|Q9LXV3|DIT1_ARATH Dicarboxylate transporter 1, chloroplastic OS=Arabidopsis thaliana OX=3702 GN=DIT1 PE=1 SV=1 && PF00939:Sodium:sulfate symporter transmembrane region	Na_sulph_symp
Ila12G004150	1985	2029	1521	2408	2984	3701	256.6336323	259.338488	181.2514637	300.1572528	339.6645155	457.4339744	2958.494316	1879.900856	0.65432198	0.001575064	0.008436364	Ila12G004150	GWHBIST00000012	21155657	21161103	+	720	protein_coding	- && sp|P82538|PPL1_ARATH PsbP-like protein 1, chloroplastic OS=Arabidopsis thaliana OX=3702 GN=PPL1 PE=1 SV=1 && PF01789:PsbP	-
Ila15G009720	2354	2584	3474	2061	2304	1851	85.6291689	92.92651436	116.4781148	72.2823996	73.78975107	64.36917774	2016.655433	2827.303536	-0.48755111	0.001736648	0.009154979	Ila15G009720	GWHBIST00000015	13369631	13377054	+	2559	protein_coding	- && sp|F4KIB2|TMN8_ARATH Transmembrane 9 superfamily member 8 OS=Arabidopsis thaliana OX=3702 GN=TMN8 PE=2 SV=1 && PF02990:Endomembrane protein 70	-
Ila17G021190	2642	3158	4320	1627	1547	1314	162.7623326	192.3379953	245.3036934	96.63800245	83.9092242	77.38784078	1459.503817	3397.335498	-1.219074658	1.91E-11	8.96E-10	Ila17G021190	GWHBIST00000017	43624374	43626846	+	1511	protein_coding	- && sp|Q9SV71|B561O_ARATH Cytochrome b561 and DOMON domain-containing protein At4g12980 OS=Arabidopsis thaliana OX=3702 GN=At4g12980 PE=2 SV=1 && PF04526:Protein of unknown function (DUF568)|PF03188:Eukaryotic cytochrome b561	Cytochrom_B561
Ila17G002180	1887	1587	1457	2754	3749	3172	174.6061256	145.176516	124.2642994	245.6918842	305.4227028	280.5931254	3133.279157	1672.850936	0.905625182	5.28E-08	1.12E-06	Ila17G002180	GWHBIST00000017	2359459	2362905	-	1006	protein_coding	- && sp|A6MZM2|SUI1_ORYSI Protein translation factor SUI1 homolog OS=Oryza sativa subsp. indica OX=39946 GN=GOS2 PE=2 SV=1 && PF01253:Translation initiation factor SUI1	SUI1
Ila14G025840	2481	2593	2426	2339	2289	2464	198.9207558	205.5359151	179.284763	180.8101714	161.5836557	188.8644909	2309.767908	2537.950344	-0.135949535	0.280545365	0.460596572	Ila14G025840	GWHBIST00000014	54538912	54540072	+	1161	protein_coding	- && - && -	-
Ila12G007270	2005	2080	1752	2803	2920	3025	57.44473388	58.91570073	46.26677147	77.42803579	73.65750375	82.85476621	2846.329309	1978.669651	0.524705224	0.000200631	0.001471722	Ila12G007270	GWHBIST00000012	25999253	26006721	-	3249	protein_coding	- && - && -	-
Ila16G020250	2554	2780	3850	1773	1901	1713	97.11695021	104.5083055	134.937954	65.00132027	63.64357395	62.27127788	1750.187235	3085.378398	-0.818082767	1.49E-07	2.84E-06	Ila16G020250	GWHBIST00000016	46829936	46837270	+	2448	protein_coding	- && sp|Q9FYQ8|TMN11_ARATH Transmembrane 9 superfamily member 11 OS=Arabidopsis thaliana OX=3702 GN=TMN11 PE=2 SV=1 && PF02990:Endomembrane protein 70	-
Ila14G006860	1829	2806	3252	2634	2155	1871	96.73565885	146.7210488	158.5340935	134.3160646	100.350251	94.60257295	2170.169951	2649.470957	-0.288038606	0.185702664	0.347529272	Ila14G006860	GWHBIST00000014	9522145	9523949	-	1760	protein_coding	- && sp|Q8W3M4|Y4744_ARATH Uncharacterized protein At4g06744 OS=Arabidopsis thaliana OX=3702 GN=At4g06744 PE=2 SV=1 && -	-
Ila16G023330	489	191	262	4758	4870	3976	53.86885027	20.80147265	26.60292481	505.3503659	472.3415046	418.7275108	4418.785876	320.465902	3.785927638	2.98E-38	5.03E-35	Ila16G023330	GWHBIST00000016	51137369	51138213	-	845	protein_coding	- && sp|Q9LV58|MBF1C_ARATH Multiprotein-bridging factor 1c OS=Arabidopsis thaliana OX=3702 GN=MBF1C PE=1 SV=1 && PF08523:Multiprotein bridging factor 1|PF01381:Helix-turn-helix	HTH_3
Ila14G018920	2768	3267	2615	2071	2088	1716	99.56056901	116.1722194	86.69463568	71.81921975	66.12262385	59.00581864	1908.73432	2931.000029	-0.618688705	6.91E-05	0.000592608	Ila14G018920	GWHBIST00000014	45163821	45169058	-	2588	protein_coding	- && sp|F4J3R7|SPD1_ARATH Protein SEEDLING PLASTID DEVELOPMENT 1 OS=Arabidopsis thaliana OX=3702 GN=SPD1 PE=2 SV=1 && PF00004:ATPase family associated with various cellular activities (AAA)	AAA
Ila12G013860	2897	2682	1993	2409	1785	2757	114.0257418	104.3626389	72.30377263	91.41774633	61.85729603	103.7402881	2276.253121	2574.51149	-0.177665176	0.442572594	0.620206137	Ila12G013860	GWHBIST00000012	32575926	32600108	-	2365	protein_coding	- && sp|Q8W4D6|HC173_ARATH Protein HIGH CHLOROPHYLL FLUORESCENCE PHENOTYPE 173, chloroplastic OS=Arabidopsis thaliana OX=3702 GN=HCF173 PE=1 SV=1 && PF13460:NAD(P)H-binding|PF08547:Complex I intermediate-associated protein 30 (CIA30)	-
Ila19G000150	1871	1749	1543	3232	2736	3392	76.52213632	70.71881512	58.16724211	127.445337	98.52074602	132.6250054	3056.343273	1750.734948	0.803891824	2.50E-06	3.39E-05	Ila19G000150	GWHBIST00000019	387927	392758	+	2276	protein_coding	- && sp|Q9LZV4|STN8_ARATH Serine/threonine-protein kinase STN8, chloroplastic OS=Arabidopsis thaliana OX=3702 GN=STN8 PE=2 SV=1 && PF00069:Protein kinase domain	Pkinase
Ila07G010460	1988	1969	1692	2667	3033	3172	69.23137824	67.78977324	54.31080058	89.54656122	92.99450948	105.6029496	2884.290173	1915.211944	0.59087297	6.21E-05	0.000540395	Ila07G010460	GWHBIST00000007	25112143	25125700	+	2673	protein_coding	- && sp|Q9LDA9|CAF2P_ARATH CRS2-associated factor 2, chloroplastic OS=Arabidopsis thaliana OX=3702 GN=At1g23400 PE=2 SV=1 && PF01985:CRS1 / YhbY (CRM) domain	-
Ila15G000930	3008	2796	2999	2045	1915	1740	76.65027476	70.4376598	70.43874316	50.2421824	42.96382733	42.38785155	1854.898204	2975.723532	-0.681971695	6.17E-08	1.29E-06	Ila15G000930	GWHBIST00000015	1185432	1194904	+	3653	protein_coding	- && sp|O23617|TPS5_ARATH Alpha,alpha-trehalose-phosphate synthase [UDP-forming] 5 OS=Arabidopsis thaliana OX=3702 GN=TPS5 PE=1 SV=2 && PF02358:Trehalose-phosphatase|PF00982:Glycosyltransferase family 20	-
Ila05G015400	1860	2564	4098	1411	2667	1900	97.70904823	133.1593686	198.4234704	71.46413674	123.3511363	95.41830817	1925.935589	2848.700417	-0.564730349	0.036826114	0.104707188	Ila05G015400	GWHBIST00000005	32125986	32129366	-	1772	protein_coding	- && sp|P46263|TBB1_SOLTU Tubulin beta-1 chain OS=Solanum tuberosum OX=4113 GN=TUBB1 PE=2 SV=1 && PF03953:Tubulin C-terminal domain|PF00091:Tubulin/FtsZ family, GTPase domain	Tubulin
Ila11G005470	1564	1287	1158	3478	3345	3641	31.14824607	25.34003805	21.25713135	66.7829694	58.65314046	69.32243344	3408.910554	1360.798673	1.325055483	5.57E-15	5.04E-13	Ila11G005470	GWHBIST00000011	21163395	21194944	-	4674	protein_coding	- && sp|O53732|UFAA1_MYCTU Tuberculostearic acid methyltransferase UfaA1 OS=Mycobacterium tuberculosis (strain ATCC 25618 / H37Rv) OX=83332 GN=ufaA1 PE=1 SV=3 && PF02353:Mycolic acid cyclopropane synthetase|PF13450:NAD(P)-binding Rossmann-like domain	-
Ila08G013150	2559	2697	3538	1970	2112	1555	146.2294201	152.3622179	186.3466325	108.5350467	106.2567886	84.94760474	1828.501649	2958.27078	-0.694136211	1.46E-05	0.000155562	Ila08G013150	GWHBIST00000008	33309246	33311991	+	1629	protein_coding	- && sp|Q94A20|LFG5_ARATH BI1-like protein OS=Arabidopsis thaliana OX=3702 GN=LFG5 PE=2 SV=1 && PF01027:Inhibitor of apoptosis-promoting Bax1	-
Ila19G008250	1931	1757	1393	2974	3006	3354	51.29838971	46.14504648	34.10922278	76.17311615	70.30864612	85.18061853	3039.834874	1726.211909	0.816547842	4.50E-06	5.66E-05	Ila19G008250	GWHBIST00000019	23313915	23346893	+	3504	protein_coding	- && - && PF07766:LETM1-like protein	-
Ila13G005810	2407	2366	3145	2207	2359	1922	105.7878256	102.8030994	127.4029543	93.51929692	91.28214599	80.75496926	2106.265569	2664.941636	-0.339515957	0.015562435	0.054026977	Ila13G005810	GWHBIST00000013	7394101	7399953	+	2118	protein_coding	- && sp|Q43054|TCMO_POPKI Trans-cinnamate 4-monooxygenase OS=Populus kitakamiensis OX=34292 GN=CYP73A16 PE=2 SV=1 && PF00067:Cytochrome P450	p450
Ila17G007050	1936	2590	3775	2432	1699	1973	114.7135511	151.7193603	206.1700497	138.9351842	88.63414307	111.7616304	1996.319497	2780.372624	-0.47815391	0.044347998	0.120282727	Ila17G007050	GWHBIST00000017	10045356	10046926	+	1571	protein_coding	- && sp|Q9SU13|FLA2_ARATH Fasciclin-like arabinogalactan protein 2 OS=Arabidopsis thaliana OX=3702 GN=FLA2 PE=2 SV=1 && PF02469:Fasciclin domain	-
Ila15G004710	3009	2862	2519	1996	1906	2097	80.27989107	75.48941916	61.9458195	51.34337619	44.77192662	53.48589773	1954.638409	2844.591843	-0.541325368	0.0002965	0.002050999	Ila15G004710	GWHBIST00000015	5734443	5738992	+	3489	protein_coding	- && sp|Q38897|BEL1_ARATH Homeobox protein BEL1 homolog OS=Arabidopsis thaliana OX=3702 GN=BEL1 PE=1 SV=2 && PF07526:Associated with HOX|PF05920:Homeobox KN domain	POX
Ila03G009150	2375	2894	3535	2012	1869	1693	195.9927789	236.1059061	268.8841009	160.0824537	135.7950871	133.5640831	1814.026455	2961.057446	-0.707098996	1.04E-05	0.000117826	Ila03G009150	GWHBIST00000003	21210516	21211643	-	1128	protein_coding	- && sp|Q9SRN0|NHL1_ARATH NDR1/HIN1-like protein 1 OS=Arabidopsis thaliana OX=3702 GN=NHL1 PE=2 SV=1 && PF03168:Late embryogenesis abundant protein	-
Ila18G014470	2747	2373	2296	2120	2519	2318	121.1311896	103.4491505	93.31865165	90.1306459	97.79660771	97.71630286	2258.099348	2513.088392	-0.154176351	0.269895283	0.449089482	Ila18G014470	GWHBIST00000018	35433831	35437768	-	2111	protein_coding	- && sp|A0A067XGX8|AROG2_PETHY Phospho-2-dehydro-3-deoxyheptonate aldolase 2, chloroplastic OS=Petunia hybrida OX=4102 GN=DAHP2 PE=2 SV=1 && PF01474:Class-II DAHP synthetase family	-
Ila12G007600	2580	2403	2881	2235	2539	1699	64.76875316	59.6391533	66.66353469	54.09568914	56.11860048	40.77514198	2096.605188	2653.174931	-0.339587306	0.030747779	0.091650437	Ila12G007600	GWHBIST00000012	26367559	26373335	+	3708	protein_coding	- && sp|M1BJF6|JOKA2_SOLTU Protein JOKA2 OS=Solanum tuberosum OX=4113 GN=JOKA2 PE=1 SV=1 && PF00564:PB1 domain|PF00569:Zinc finger, ZZ type|PF16158:Ig-like domain from next to BRCA1 gene	ZZ
Ila16G000400	1147	917	962	3812	3596	3901	38.42027131	30.36674291	29.70101765	123.1088292	106.0510549	124.9192109	3684.844908	1024.949307	1.846222601	1.08E-33	1.14E-30	Ila16G000400	GWHBIST00000016	438660	441438	+	2779	protein_coding	- && sp|Q8GWE0|PP314_ARATH Pentatricopeptide repeat-containing protein At4g16390, chloroplastic OS=Arabidopsis thaliana OX=3702 GN=P67 PE=1 SV=3 && PF17177:Pentacotripeptide-repeat region of PRORP|PF13041:PPR repeat family	-
Ila01G000670	2432	2400	2678	2209	2503	2064	84.0021414	81.95395105	85.25828803	73.56340145	76.11774898	68.15422003	2198.454838	2535.325043	-0.20561356	0.058854108	0.149354295	Ila01G000670	GWHBIST00000001	701294	714212	+	2695	protein_coding	- && sp|Q9T0A0|LACS4_ARATH Long chain acyl-CoA synthetase 4 OS=Arabidopsis thaliana OX=3702 GN=LACS4 PE=2 SV=1 && PF00501:AMP-binding enzyme	AMP-binding
Ila12G008290	2154	2390	1784	2955	2503	2498	60.19447382	66.02990798	45.95206389	79.61734815	61.58430907	66.73591663	2593.808956	2147.72539	0.272323004	0.125153439	0.26145894	Ila12G008290	GWHBIST00000012	27168057	27184263	+	3331	protein_coding	- && sp|Q84W56|RNJ_ARATH Ribonuclease J OS=Arabidopsis thaliana OX=3702 GN=RNJ PE=1 SV=1 && PF00753:Metallo-beta-lactamase superfamily|PF13837:Myb/SANT-like DNA-binding domain|PF07521:Zn-dependent metallo-hydrolase RNA specificity domain	Lactamase_B
Ila03G002800	1927	1955	2030	2832	2745	2792	73.27500511	73.49415011	71.14910299	103.8261359	91.89984771	101.495276	2724.718649	1997.723658	0.4476693	5.93E-05	0.000520512	Ila03G002800	GWHBIST00000003	4151154	4156669	+	2448	protein_coding	- && sp|Q0DHL4|FTSH8_ORYSJ ATP-dependent zinc metalloprotease FTSH 8, mitochondrial OS=Oryza sativa subsp. japonica OX=39947 GN=FTSH8 PE=3 SV=1 && PF00004:ATPase family associated with various cellular activities (AAA)|PF06480:FtsH Extracellular|PF17862:AAA+ lid domain|PF01434:Peptidase family M41	AAA
Ila17G013540	2189	2589	3236	2079	2224	1961	189.3734305	221.4303788	258.0364428	173.4071792	169.3972548	162.1836802	2034.809741	2695.038996	-0.405554417	0.006053707	0.025451894	Ila17G013540	GWHBIST00000017	32231307	32235946	-	1076	protein_coding	- && sp|P27164|CALM3_PETHY Calmodulin-related protein OS=Petunia hybrida OX=4102 GN=CAM53 PE=2 SV=2 && PF13499:EF-hand domain pair	-
Ila17G015410	2213	2367	1538	2168	2709	3235	145.070339	153.4006986	92.92932781	137.0237312	156.3523874	202.7345508	2638.136677	2081.325242	0.342140147	0.125143258	0.26145894	Ila17G015410	GWHBIST00000017	35898254	35905627	+	1420	protein_coding	- && sp|A0QV10|Y2408_MYCS2 Uncharacterized oxidoreductase MSMEG_2408/MSMEI_2347 OS=Mycolicibacterium smegmatis (strain ATCC 700084 / mc(2)155) OX=246196 GN=MSMEG_2408 PE=1 SV=1 && PF00248:Aldo/keto reductase family	Aldo_ket_red
Ila06G005410	2045	2090	2848	2380	2513	2342	100.2957801	101.3368737	128.7444694	112.5396615	108.5125919	109.8076282	2351.639241	2348.207958	0.001903481	0.989279274	0.994909692	Ila06G005410	GWHBIST00000006	5248013	5253494	-	1898	protein_coding	- && sp|Q38827|IAA9_ARATH Auxin-responsive protein IAA9 OS=Arabidopsis thaliana OX=3702 GN=IAA9 PE=1 SV=1 && PF02309:AUX/IAA family	-
Ila18G014060	2845	2632	2589	2140	2201	1788	93.7784682	85.77063322	78.65967772	68.01018195	63.87621979	56.34360758	1990.59971	2730.650244	-0.455933524	0.00076029	0.004605235	Ila18G014060	GWHBIST00000018	34890613	34895816	-	2824	protein_coding	- && - && -	-
Ila13G001120	2539	2015	1962	2845	2515	2301	74.20596556	58.22145272	52.85357535	80.16737989	64.71611069	64.29082674	2494.871473	2209.89016	0.175054141	0.312024271	0.494593025	Ila13G001120	GWHBIST00000013	1104580	1113377	+	3185	protein_coding	- && sp|O24301|SUS2_PEA Sucrose synthase 2 OS=Pisum sativum OX=3888 GN=SUS2 PE=2 SV=1 && PF00862:Sucrose synthase|PF00534:Glycosyl transferases group 1	Glycos_transf_1
Ila02G003340	2212	2205	2466	2493	2426	2366	119.7132529	117.9770604	123.0125525	130.0824438	115.5969049	122.4131636	2370.914051	2323.316731	0.029099015	0.791213973	0.880961379	Ila02G003340	GWHBIST00000002	11471179	11478783	+	1720	protein_coding	- && sp|O64982|PRS7_PRUPE 26S proteasome regulatory subunit 7 OS=Prunus persica OX=3760 GN=RPT1 PE=2 SV=1 && PF00004:ATPase family associated with various cellular activities (AAA)|PF17862:AAA+ lid domain	AAA
Ila16G017550	1466	1287	1289	3227	3343	3550	128.0154307	111.1063207	103.7481873	271.6855976	257.0176973	296.35549	3293.612315	1368.727506	1.266984388	8.99E-21	1.91E-18	Ila16G017550	GWHBIST00000016	43447759	43451072	+	1066	protein_coding	- && sp|O65282|CH20_ARATH 20 kDa chaperonin, chloroplastic OS=Arabidopsis thaliana OX=3702 GN=CPN20 PE=1 SV=2 && PF00166:Chaperonin 10 Kd subunit	-
Ila13G012640	1971	2043	2359	2474	2810	2499	117.6863423	120.5978805	129.8274809	142.4224446	147.7216198	142.646779	2526.705113	2149.097511	0.233450776	0.030040225	0.089992596	Ila13G012640	GWHBIST00000013	26290793	26293954	+	1559	protein_coding	- && sp|P43644|DNJH_ATRNU DnaJ protein homolog ANJ1 OS=Atriplex nummularia OX=3553 PE=2 SV=1 && PF00684:DnaJ central domain|PF00226:DnaJ domain|PF01556:DnaJ C terminal domain	DnaJ_C
Ila11G002030	1550	1648	1514	2793	3323	3265	36.33434766	38.192206	32.71227833	63.1242025	68.58265767	73.16866432	3046.63443	1594.712295	0.934091305	1.78E-13	1.24E-11	Ila11G002030	GWHBIST00000011	11770723	11775642	+	3971	protein_coding	- && sp|Q9LRT1|Y3804_ARATH Probably inactive leucine-rich repeat receptor-like protein kinase At3g28040 OS=Arabidopsis thaliana OX=3702 GN=At3g28040 PE=1 SV=1 && PF08263:Leucine rich repeat N-terminal domain|PF13855:Leucine rich repeat|PF00069:Protein kinase domain	Pkinase
Ila09G005980	1637	1657	1502	2879	3034	3358	57.20052504	57.24080222	48.37494863	96.99119275	93.3394446	112.1729909	3017.8329	1624.285688	0.89381709	1.20E-10	4.67E-09	Ila09G005980	GWHBIST00000009	8048456	8061816	+	2664	protein_coding	- && sp|Q84N64|ARC5_ARATH Dynamin-like protein ARC5 OS=Arabidopsis thaliana OX=3702 GN=ARC5 PE=1 SV=2 && PF00350:Dynamin family	-
Ila14G004350	2385	2397	2334	2310	2461	2155	31.2515086	31.05149433	28.18919693	29.18326527	28.39177322	26.99517519	2249.835478	2407.379063	-0.097527163	0.384883652	0.566688079	Ila14G004350	GWHBIST00000014	5045263	5063337	+	7104	protein_coding	- && sp|P40468|TAO3_YEAST Cell morphogenesis protein PAG1 OS=Saccharomyces cerevisiae (strain ATCC 204508 / S288c) OX=559292 GN=TAO3 PE=1 SV=1 && PF14225:Cell morphogenesis C-terminal|PF14228:Cell morphogenesis central region|PF14222:Cell morphogenesis N-terminal	-
Ila14G005730	2252	2597	3061	1982	2329	1816	37.07644946	42.27012862	46.45070717	31.46101297	33.75961932	28.58260902	1986.113347	2663.529146	-0.423398924	0.002504272	0.012390124	Ila14G005730	GWHBIST00000014	6854262	6878340	+	5654	protein_coding	- && - && -	-
Ila14G025090	2412	2345	1726	2185	2565	2798	94.29821334	90.6360302	62.19653644	82.3601069	88.29006376	104.5755466	2454.023899	2203.518066	0.155482848	0.412790545	0.593720883	Ila14G025090	GWHBIST00000014	53740053	53748817	-	2381	protein_coding	- && sp|Q9M4G5|PGMP_SOLTU Phosphoglucomutase, chloroplastic OS=Solanum tuberosum OX=4113 GN=PGMP PE=2 SV=1 && PF02880:Phosphoglucomutase/phosphomannomutase, alpha/beta/alpha domain III|PF02879:Phosphoglucomutase/phosphomannomutase, alpha/beta/alpha domain II|PF02878:Phosphoglucomutase/phosphomannomutase, alpha/beta/alpha domain I	PGM_PMM_III
Ila17G025690	2576	2542	2419	2054	2409	2030	95.04169311	92.72049031	82.26278767	73.06477386	78.2534342	71.60125194	2106.180624	2551.241431	-0.276351572	0.020832898	0.068083496	Ila17G025690	GWHBIST00000017	48158176	48174077	-	2523	protein_coding	- && sp|Q9ZSM8|EZA1_ARATH Histone-lysine N-methyltransferase EZA1 OS=Arabidopsis thaliana OX=3702 GN=EZA1 PE=1 SV=1 && PF00856:SET domain|PF18264:CXC domain	SET
Ila03G011580	2342	2236	1826	2005	2398	3211	85.82992447	81.01314765	61.68106465	70.8443983	77.37476064	112.4989367	2479.906301	2173.682826	0.190203333	0.366344643	0.549232719	Ila03G011580	GWHBIST00000003	24928919	24942218	+	2540	protein_coding	- && sp|F4K410|SVR3_ARATH Putative elongation factor TypA-like SVR3, chloroplastic OS=Arabidopsis thaliana OX=3702 GN=SVR3 PE=1 SV=1 && PF03144:Elongation factor Tu domain 2|PF00009:Elongation factor Tu GTP binding domain|PF00679:Elongation factor G C-terminus	GTP_EFTU
Ila20G003180	2291	2247	2495	2423	2269	2252	272.3634855	264.0941214	273.3969042	277.7259799	237.496159	255.9460625	2261.211866	2374.647486	-0.070780515	0.542029248	0.704328188	Ila20G003180	GWHBIST00000020	2934791	2936946	-	783	protein_coding	- && sp|P29766|RL8_SOLLC 60S ribosomal protein L8 OS=Solanum lycopersicum OX=4081 GN=RPL8 PE=2 SV=1 && PF03947:Ribosomal Proteins L2, C-terminal domain|PF00181:Ribosomal Proteins L2, RNA binding domain	Ribosomal_L2_C
Ila01G007000	2151	2099	2106	2241	2723	2656	91.55397052	88.32447799	82.62174981	91.96401619	102.0428817	108.0739728	2474.015338	2149.853168	0.202741113	0.097070736	0.216775417	Ila01G007000	GWHBIST00000001	8401243	8408366	+	2187	protein_coding	- && sp|Q91WJ8|FUBP1_MOUSE Far upstream element-binding protein 1 OS=Mus musculus OX=10090 GN=Fubp1 PE=1 SV=1 && PF00013:KH domain	KH_1
Ila02G006390	2558	2211	2365	2372	2271	2176	30.52751784	26.08624469	26.01485125	27.29260173	23.86197509	24.82596375	2219.357995	2413.545274	-0.121019998	0.35073545	0.534300615	Ila02G006390	GWHBIST00000002	15914987	15984487	-	7800	protein_coding	- && sp|F4I893|ILA_ARATH Protein ILITYHIA OS=Arabidopsis thaliana OX=3702 GN=ILA PE=1 SV=1 && PF12348:CLASP N terminal	-
Ila09G009920	2097	2143	2285	2472	2528	2425	73.02726367	73.78033726	73.34525964	82.99928734	77.51075501	80.73365469	2414.82306	2203.70609	0.131902344	0.198144428	0.363560175	Ila09G009920	GWHBIST00000009	21728361	21754056	-	2673	protein_coding	- && sp|Q8VZH2|APM1_ARATH Aminopeptidase M1 OS=Arabidopsis thaliana OX=3702 GN=APM1 PE=1 SV=1 && PF11838:ERAP1-like C-terminal domain|PF17900:Peptidase M1 N-terminal domain|PF01433:Peptidase family M1 domain	-
Ila12G012670	2087	2235	1796	2083	2650	3066	192.5381697	203.8467469	152.7214261	185.2776183	215.2477221	270.4100403	2535.141711	2074.808444	0.289191352	0.117279726	0.249048907	Ila12G012670	GWHBIST00000012	31173636	31177838	-	1009	protein_coding	- && - && PF05899:Protein of unknown function (DUF861)	Cupin_3
Ila10G001310	1845	2485	3108	1929	2456	2052	102.9641125	137.1032566	159.8710283	103.7913204	120.6746846	109.4770632	2085.925819	2498.155849	-0.260241824	0.148838445	0.296182374	Ila10G001310	GWHBIST00000010	1224036	1227557	+	1668	protein_coding	- && sp|Q6VAF6|TBB6_GOSHI Tubulin beta-6 chain OS=Gossypium hirsutum OX=3635 PE=2 SV=1 && PF00091:Tubulin/FtsZ family, GTPase domain|PF03953:Tubulin C-terminal domain	Tubulin
Ila04G005950	2215	2424	2341	2295	2406	2142	88.07605887	95.29028494	85.79950942	87.98449221	84.23218484	81.42539638	2223.581688	2359.672645	-0.085652086	0.442442489	0.620098766	Ila04G005950	GWHBIST00000004	18061757	18067308	-	2341	protein_coding	- && sp|O04197|COI1_ARATH Coronatine-insensitive protein 1 OS=Arabidopsis thaliana OX=3702 GN=COI1 PE=1 SV=1 && PF18791:Transport inhibitor response 1 protein domain|PF18511:F-box	-
Ila08G014030	1835	1744	1693	2856	2888	2794	34.78177094	32.68089716	29.57820596	52.19310387	48.19601281	50.62887721	2777.339759	1784.658045	0.638171048	1.04E-07	2.04E-06	Ila08G014030	GWHBIST00000008	34176936	34181846	-	4911	protein_coding	- && sp|O81283|TC159_ARATH Translocase of chloroplast 159, chloroplastic OS=Arabidopsis thaliana OX=3702 GN=TOC159 PE=1 SV=1 && PF11886:Translocase of chloroplast 159/132, membrane anchor domain|PF04548:AIG1 family	-
Ila18G014070	1467	2336	2917	2345	2166	2563	48.21946872	75.90965423	88.37470656	74.31465291	62.68289696	80.53732223	2307.026144	2253.670346	0.033567114	0.879989797	0.934221118	Ila18G014070	GWHBIST00000018	34905018	34911498	-	2832	protein_coding	- && sp|A5JTQ3|XYL2_MEDSV Beta-xylosidase/alpha-L-arabinofuranosidase 2 OS=Medicago sativa subsp. varia OX=36902 GN=Xyl2 PE=2 SV=1 && PF14310:Fibronectin type III-like domain|PF00933:Glycosyl hydrolase family 3 N terminal domain|PF01915:Glycosyl hydrolase family 3 C-terminal domain	Glyco_hydro_3_C
Ila06G012970	2393	2295	2541	2424	2203	1934	45.52532335	43.16431944	44.55682678	44.4613101	36.8997257	35.17410718	2135.317746	2441.525739	-0.193420426	0.151100753	0.299322783	Ila06G012970	GWHBIST00000006	18989284	19042889	-	4893	protein_coding	- && sp|Q94FB9|AB1D_ARATH ABC transporter D family member 1 OS=Arabidopsis thaliana OX=3702 GN=ABCD1 PE=1 SV=1 && PF06472:ABC transporter transmembrane region 2|PF00005:ABC transporter	ABC_tran
Ila08G006820	2211	2011	2140	2407	2351	2661	120.4293205	108.2897701	107.4376537	126.4034371	112.7442554	138.5621586	2417.301129	2151.365857	0.16807956	0.20377974	0.370330028	Ila08G006820	GWHBIST00000008	20053416	20056747	+	1709	protein_coding	- && sp|Q96288|BBX24_ARATH B-box zinc finger protein 24 OS=Arabidopsis thaliana OX=3702 GN=BBX24 PE=1 SV=1 && PF00643:B-box zinc finger	zf-B_box
Ila16G020960	2100	2845	4700	1008	1530	1541	74.75377994	100.1216507	154.2094433	34.59502865	47.95165423	52.44121849	1321.894876	3222.626651	-1.285675111	8.84E-07	1.36E-05	Ila16G020960	GWHBIST00000016	47698546	47703176	+	2615	protein_coding	- && sp|Q9SWW6|CESA7_ARATH Cellulose synthase A catalytic subunit 7 [UDP-forming] OS=Arabidopsis thaliana OX=3702 GN=CESA7 PE=1 SV=1 && PF03552:Cellulose synthase	-
Ila19G006290	1864	1731	1436	2443	2940	3299	83.86311188	76.99348912	59.54958701	105.9711951	116.458367	141.8938764	2822.786184	1707.712095	0.725219893	5.17E-05	0.000464126	Ila19G006290	GWHBIST00000019	19423437	19433699	+	2069	protein_coding	- && sp|Q9LYT2|PP287_ARATH Pentatricopeptide repeat-containing protein At3g59040 OS=Arabidopsis thaliana OX=3702 GN=At3g59040 PE=2 SV=2 && PF13812:Pentatricopeptide repeat domain|PF13041:PPR repeat family	-
Ila09G012190	2191	2498	2823	1873	2284	2039	36.8277327	41.51039886	43.73636965	30.35356331	33.80080197	32.76469299	2009.983616	2531.676966	-0.332929138	0.007768128	0.031194942	Ila09G012190	GWHBIST00000009	27644733	27683863	-	5538	protein_coding	- && sp|Q8SAB7|SPK1_ARATH Guanine nucleotide exchange factor SPIKE 1 OS=Arabidopsis thaliana OX=3702 GN=SPK1 PE=1 SV=1 && PF14429:C2 domain in Dock180 and Zizimin proteins|PF06920:Dock homology region 2	Ded_cyto
Ila10G005160	2126	2238	2030	2308	2461	2536	86.30674975	89.82008284	75.95857136	90.33511577	87.96125465	98.42082997	2376.132148	2164.622335	0.134574753	0.283868097	0.464052369	Ila10G005160	GWHBIST00000010	5820348	5827963	-	2293	protein_coding	- && sp|Q8H103|G6PIP_ARATH Glucose-6-phosphate isomerase 1, chloroplastic OS=Arabidopsis thaliana OX=3702 GN=PGI1 PE=1 SV=1 && PF00342:Phosphoglucose isomerase	-
Ila01G011780	1975	2057	1818	2438	2752	2654	73.68551212	75.87193593	62.51844013	87.69766033	90.39860653	94.66124175	2548.458966	1981.491551	0.363212825	0.004412598	0.019755727	Ila01G011780	GWHBIST00000001	22409735	22417831	-	2495	protein_coding	- && sp|O64843|CID7_ARATH Polyadenylate-binding protein-interacting protein 7 OS=Arabidopsis thaliana OX=3702 GN=CID7 PE=1 SV=1 && PF08590:Domain of unknown function (DUF1771)	-
Ila13G004580	2081	2615	3329	1735	2065	1869	44.84085549	55.70643552	66.11726085	36.04463135	39.17600673	38.50058985	1839.736681	2696.232666	-0.551547012	0.000855709	0.005086215	Ila13G004580	GWHBIST00000013	5537160	5564806	+	4320	protein_coding	- && sp|Q8RWY6|CLASP_ARATH CLIP-associated protein OS=Arabidopsis thaliana OX=3702 GN=CLASP PE=1 SV=1 && PF12348:CLASP N terminal	-
Ila15G008470	2718	2888	2939	1815	1760	1552	198.2824764	208.2878506	197.6212838	127.6588156	113.0435662	108.2387757	1667.374871	2887.059574	-0.792088098	4.00E-11	1.76E-09	Ila15G008470	GWHBIST00000015	10910127	10913835	-	1276	protein_coding	- && sp|P41917|RAN2_ARATH GTP-binding nuclear protein Ran-2 OS=Arabidopsis thaliana OX=3702 GN=RAN2 PE=1 SV=3 && PF00071:Ras family	Ras
Ila18G002890	2643	2943	2705	1938	1800	1632	87.86677528	96.72743125	82.88845464	62.11844808	52.68637639	51.86853141	1747.650524	2804.68471	-0.68246549	4.10E-07	6.96E-06	Ila18G002890	GWHBIST00000018	3331525	3336144	-	2800	protein_coding	- && sp|Q43848|TKTC_SOLTU Transketolase, chloroplastic OS=Solanum tuberosum OX=4113 PE=2 SV=1 && PF00456:Transketolase, thiamine diphosphate binding domain|PF02779:Transketolase, pyrimidine binding domain|PF02780:Transketolase, C-terminal domain	-
Ila01G002680	2223	2042	1815	2330	2464	2784	103.5171305	94.00703766	77.9020058	104.6087428	101.0210239	123.9362255	2467.093249	2061.808775	0.258994225	0.100103975	0.221522319	Ila01G002680	GWHBIST00000001	2853379	2857946	-	1999	protein_coding	- && sp|Q9XJ36|CLPR2_ARATH ATP-dependent Clp protease proteolytic subunit-related protein 2, chloroplastic OS=Arabidopsis thaliana OX=3702 GN=CLPR2 PE=1 SV=1 && PF00574:Clp protease	-
Ila17G000040	2354	2201	2234	2254	2481	2125	34.76519803	32.13587721	30.41029733	32.09456253	32.25992204	30.00222446	2227.155152	2296.895758	-0.044327808	0.701182719	0.82327167	Ila17G000040	GWHBIST00000017	119718	178593	-	6303	protein_coding	- && sp|A4GSN8|NUA_ARATH Nuclear-pore anchor OS=Arabidopsis thaliana OX=3702 GN=NUA PE=1 SV=1 && PF07926:TPR/MLP1/MLP2-like protein	-
Ila18G012410	2101	1959	2056	2412	2746	2358	41.61153634	38.35782751	37.53272157	46.0579179	47.88357102	44.64653626	2439.236694	2068.110849	0.238277075	0.031651889	0.093676801	Ila18G012410	GWHBIST00000018	32235790	32261581	+	4700	protein_coding	- && sp|Q8L5Y6|CAND1_ARATH Cullin-associated NEDD8-dissociated protein 1 OS=Arabidopsis thaliana OX=3702 GN=CAND1 PE=1 SV=1 && PF08623:TATA-binding protein interacting (TIP20)	-
Ila05G010230	1562	1361	1043	3106	2992	3522	107.1486585	92.29872491	65.94612257	205.4217665	180.7030979	230.9677441	3135.888211	1348.653922	1.217557895	6.41E-10	2.11E-08	Ila05G010230	GWHBIST00000005	26381071	26385973	-	1357	protein_coding	- && sp|Q8LBV4|Y1814_ARATH Uncharacterized methyltransferase At1g78140, chloroplastic OS=Arabidopsis thaliana OX=3702 GN=At1g78140 PE=1 SV=1 && PF08241:Methyltransferase domain	Methyltransf_11
Ila20G005200	2578	3522	3629	1531	1444	879	65.05187428	87.86140022	84.40401726	37.24700791	32.08059351	21.20420764	1250.662806	3278.448902	-1.390316705	2.53E-10	9.08E-09	Ila20G005200	GWHBIST00000020	5009520	5017175	-	3689	protein_coding	- && sp|P29196|CAPP_SOLTU Phosphoenolpyruvate carboxylase OS=Solanum tuberosum OX=4113 GN=PPC1 PE=2 SV=2 && PF00311:Phosphoenolpyruvate carboxylase	-
Ila05G012510	3182	2460	4497	1438	1131	872	99.86529399	76.32756086	130.0877929	43.5123556	31.25182003	26.16297745	1121.010163	3401.896403	-1.601690731	2.24E-11	1.03E-09	Ila05G012510	GWHBIST00000005	29228479	29231444	+	2966	protein_coding	- && sp|O65351|SBT17_ARATH Subtilisin-like protease SBT1.7 OS=Arabidopsis thaliana OX=3702 GN=SBT1.7 PE=1 SV=1 && PF05922:Peptidase inhibitor I9|PF02225:PA domain|PF17766:Fibronectin type-III domain|PF00082:Subtilase family	Peptidase_S8
Ila12G003620	2068	1708	1658	2909	2520	2711	91.93045578	75.06346584	67.93485512	124.678595	98.62970175	115.2111917	2654.548922	1842.227559	0.527065631	0.001285013	0.007107728	Ila12G003620	GWHBIST00000012	19877691	19899681	+	2094	protein_coding	- && sp|Q9C9C0|SPPA1_ARATH Serine protease SPPA, chloroplastic OS=Arabidopsis thaliana OX=3702 GN=SPPA PE=2 SV=1 && PF01343:Peptidase family S49	Peptidase_S49
Ila14G005040	2898	3069	2862	1595	1626	1508	83.7256256	87.6574386	76.21297206	44.42833184	41.3598411	41.65025206	1537.64582	2987.442838	-0.95817363	2.80E-16	3.01E-14	Ila14G005040	GWHBIST00000014	5845263	5851558	+	3222	protein_coding	- && sp|Q9SW80|BLH2_ARATH BEL1-like homeodomain protein 2 OS=Arabidopsis thaliana OX=3702 GN=BLH2 PE=1 SV=3 && PF07526:Associated with HOX|PF05920:Homeobox KN domain	POX
Ila20G008490	2344	2830	2989	1820	1837	1734	150.999433	180.2337058	177.4773243	113.0390234	104.1897907	106.7881529	1753.33935	2752.763478	-0.650921135	2.52E-07	4.51E-06	Ila20G008490	GWHBIST00000020	9931355	9937294	-	1445	protein_coding	- && sp|Q9SLN8|DBR_TOBAC 2-alkenal reductase (NADP(+)-dependent) OS=Nicotiana tabacum OX=4097 GN=DBR PE=1 SV=1 && PF16884:N-terminal domain of oxidoreductase|PF00107:Zinc-binding dehydrogenase	ADH_zinc_N
Ila18G012840	2220	2446	3129	1918	1979	1849	95.45103238	103.9718989	124.0030785	79.50886573	74.91551164	76.00126817	1868.181615	2622.184366	-0.489331773	0.000450367	0.002949069	Ila18G012840	GWHBIST00000018	32964041	32972472	-	2165	protein_coding	- && sp|Q93Y22|COPD_ARATH Coatomer subunit delta OS=Arabidopsis thaliana OX=3702 GN=At5g05010 PE=1 SV=2 && PF00928:Adaptor complexes medium subunit family	Adap_comp_sub
Ila06G002210	1920	2041	2575	2242	2394	2364	118.8335164	124.8856654	146.8974314	133.7866033	130.4548309	139.8754396	2276.067834	2200.03164	0.048799286	0.708615344	0.827991534	Ila06G002210	GWHBIST00000006	2193505	2198625	-	1504	protein_coding	- && sp|Q9LHA4|VA0D2_ARATH V-type proton ATPase subunit d2 OS=Arabidopsis thaliana OX=3702 GN=VHA-d2 PE=2 SV=1 && PF01992:ATP synthase (C/AC39) subunit	-
Ila16G009810	2742	2695	3066	1575	1926	1532	141.2520808	137.2517975	145.5790237	78.22530431	87.35383712	75.44708091	1630.995741	2869.71849	-0.814981578	3.15E-12	1.71E-10	Ila16G009810	GWHBIST00000016	23969457	23973943	+	1807	protein_coding	- && sp|A0A0S2II38|C7A94_KALSE Beta-amyrin 28-monooxygenase OS=Kalopanax septemlobus OX=228393 GN=CYP716A94 PE=1 SV=1 && PF00067:Cytochrome P450	p450
Ila14G013750	1854	1600	1710	2822	2845	2702	26.59607273	22.69131331	22.61013424	39.03049786	35.93257601	37.05522026	2722.056336	1747.117309	0.639795074	2.77E-07	4.90E-06	Ila14G013750	GWHBIST00000014	31002904	31096925	-	6489	protein_coding	- && sp|Q9FNQ1|DEXHE_ARATH DExH-box ATP-dependent RNA helicase DExH14 OS=Arabidopsis thaliana OX=3702 GN=BRR2C PE=2 SV=1 && PF00271:Helicase conserved C-terminal domain|PF02889:Sec63 Brl domain|PF00270:DEAD/DEAH box helicase	Sec63
Ila04G006560	2092	2709	2134	2583	2011	1986	61.60596157	78.86820071	57.92349038	73.33727454	52.14004854	55.91091207	2147.157941	2348.504549	-0.129363595	0.486443044	0.656051612	Ila04G006560	GWHBIST00000004	18910796	18922149	-	3161	protein_coding	- && sp|F4IY62|UGPA3_ARATH UTP--glucose-1-phosphate uridylyltransferase 3, chloroplastic OS=Arabidopsis thaliana OX=3702 GN=UGP3 PE=1 SV=1 && -	-
Ila0G020190	2135	2211	2139	2299	2394	2331	42.02561926	43.02658249	38.80844801	43.6309343	41.48954656	43.86466209	2284.227647	2193.476815	0.058527727	0.594657761	0.744990146	Ila0G020190	GWHBIST00000101	281289	326545	+	4729	protein_coding	- && sp|Q9LHE9|MYO1_ARATH Myosin-1 OS=Arabidopsis thaliana OX=3702 GN=VIII-1 PE=1 SV=1 && PF00063:Myosin head (motor domain)	Myosin_head
Ila17G002030	1633	1568	1211	2633	2848	3583	170.4146342	161.7702392	116.4834147	264.9176296	261.6730443	357.4569804	2953.050751	1498.720367	0.978624572	6.07E-07	9.78E-06	Ila17G002030	GWHBIST00000017	2172276	2176083	+	892	protein_coding	- && sp|Q8VY88|LTD_ARATH Protein LHCP TRANSLOCATION DEFECT OS=Arabidopsis thaliana OX=3702 GN=LTD PE=1 SV=1 && -	-
Ila09G016800	2087	2516	3026	1785	2403	1657	33.09557295	39.44481825	44.22986636	27.29134722	33.55054088	25.12038179	1889.628178	2566.851355	-0.441829966	0.00926736	0.035879491	Ila09G016800	GWHBIST00000009	34709378	34724637	+	5870	protein_coding	- && sp|Q9LZX8|BIG2_ARATH Brefeldin A-inhibited guanine nucleotide-exchange protein 2 OS=Arabidopsis thaliana OX=3702 GN=BIG2 PE=2 SV=1 && PF12783:Guanine nucleotide exchange factor in Golgi transport N-terminal|PF16213:Dimerisation and cyclophilin-binding domain of Mon2|PF09324:Domain of unknown function (DUF1981)|PF01369:Sec7 domain|PF16206:C-terminal region of Mon2 protein	Sec7
Ila13G008020	2562	2375	3424	1845	1808	1459	84.47998022	77.42302927	104.0657174	58.65571702	52.48937534	45.99241796	1661.196955	2811.718465	-0.759354608	3.70E-06	4.78E-05	Ila13G008020	GWHBIST00000013	17755614	17773997	-	2823	protein_coding	- && sp|F4HQM3|NCER1_ARATH Neutral ceramidase 1 OS=Arabidopsis thaliana OX=3702 GN=NCER1 PE=2 SV=1 && PF17048:Neutral/alkaline non-lysosomal ceramidase, C-terminal|PF04734:Neutral/alkaline non-lysosomal ceramidase, N-terminal	Ceramidase_alk
Ila07G009650	2244	2305	2596	2164	2401	1748	167.5104693	170.1068882	178.6171022	155.7455543	157.8009317	124.7431778	2046.718252	2410.703648	-0.236086289	0.086337985	0.198859527	Ila07G009650	GWHBIST00000007	24195365	24197726	-	1247	protein_coding	- && sp|Q9FUS8|GSTUH_ARATH Glutathione S-transferase U17 OS=Arabidopsis thaliana OX=3702 GN=GSTU17 PE=2 SV=1 && PF02798:Glutathione S-transferase, N-terminal domain|PF00043:Glutathione S-transferase, C-terminal domain	GST_N
Ila16G012240	1863	1730	1809	2794	2719	2538	125.3938483	115.1174993	112.2279917	181.3130558	161.1279508	163.3094312	2619.321621	1826.865009	0.519849644	1.25E-05	0.000137437	Ila16G012240	GWHBIST00000016	34047015	34054230	+	1383	protein_coding	- && sp|P55748|CBP22_HORVU Serine carboxypeptidase II-2 (Fragment) OS=Hordeum vulgare OX=4513 GN=CXP;2-2 PE=1 SV=1 && PF00450:Serine carboxypeptidase	Peptidase_S10
Ila07G008630	1851	1769	1476	2441	2565	3350	153.4306831	144.9657813	112.7694354	195.0800593	187.1938039	265.4647612	2724.017738	1729.128327	0.655773207	0.000507897	0.003264028	Ila07G008630	GWHBIST00000007	23247384	23250172	+	1123	protein_coding	- && - && -	-
Ila06G004100	2473	2584	2531	1949	2136	1770	28.07345213	28.99987198	26.48275102	21.33157107	21.34869105	19.20884458	1900.458747	2565.796831	-0.432923339	0.000159925	0.001216544	Ila06G004100	GWHBIST00000006	3889184	3899518	+	8200	protein_coding	- && - && -	-
Ila02G007200	2203	2634	2092	1742	3234	1526	65.45452243	77.37003611	57.29095873	49.90138638	84.59865864	43.3446966	2086.564451	2347.856454	-0.169986417	0.491575801	0.661113302	Ila02G007200	GWHBIST00000002	16934635	16944960	-	3133	protein_coding	- && sp|Q9STT5|AB7A_ARATH ABC transporter A family member 7 OS=Arabidopsis thaliana OX=3702 GN=ABCA7 PE=3 SV=2 && PF12698:ABC-2 family transporter protein|PF00005:ABC transporter	ABC_tran
Ila08G015050	2090	2420	2981	1796	2354	1783	83.67753635	95.78771924	110.0078871	69.32792962	82.97883969	68.24490201	1920.276162	2520.354401	-0.392285139	0.011542492	0.042849146	Ila08G015050	GWHBIST00000008	35103506	35109870	+	2325	protein_coding	- && sp|Q9FGX1|ACLB2_ARATH ATP-citrate synthase beta chain protein 2 OS=Arabidopsis thaliana OX=3702 GN=ACLB-2 PE=1 SV=1 && PF00549:CoA-ligase|PF00285:Citrate synthase, C-terminal domain	Citrate_synt
Ila18G018300	2017	2329	2892	1910	2416	1854	42.87622184	48.94540959	56.66411995	39.14562918	45.21742648	37.67702586	2001.279813	2434.950329	-0.282977238	0.064343724	0.159668015	Ila18G018300	GWHBIST00000018	39672220	39677857	-	4379	protein_coding	- && sp|Q94A40|COPA1_ARATH Coatomer subunit alpha-1 OS=Arabidopsis thaliana OX=3702 GN=At1g62020 PE=2 SV=2 && PF06957:Coatomer (COPI) alpha subunit C-terminus|PF00400:WD domain, G-beta repeat|PF04053:Coatomer WD associated region	Coatomer_WDAD
Ila05G008380	2231	2206	2173	2102	2361	2328	47.90667449	46.83104298	43.00861222	43.51795368	44.63656248	47.78985389	2206.890112	2236.142716	-0.018904086	0.868590473	0.928795762	Ila05G008380	GWHBIST00000005	24164055	24175071	-	4335	protein_coding	- && sp|Q8W234|SEUSS_ARATH Transcriptional corepressor SEUSS OS=Arabidopsis thaliana OX=3702 GN=SEU PE=1 SV=1 && PF01803:LIM-domain binding protein	-
Ila05G013640	1653	1525	1630	2962	2834	2789	61.54863151	56.13674909	55.94128014	106.3334491	92.90598533	99.27738614	2794.72575	1625.499356	0.781812547	5.08E-11	2.19E-09	Ila05G013640	GWHBIST00000005	30396171	30406325	-	2500	protein_coding	- && sp|P34422|DPF6_CAEEL Dipeptidyl peptidase family member 6 OS=Caenorhabditis elegans OX=6239 GN=dpf-6 PE=3 SV=2 && PF00326:Prolyl oligopeptidase family	-
Ila12G011530	2152	2274	2946	1934	2237	1837	54.12634958	56.54429571	68.29650223	46.89885505	49.53712018	44.17045773	1948.743395	2480.406047	-0.348109663	0.012387541	0.045234767	Ila12G011530	GWHBIST00000012	30221619	30236402	-	3701	protein_coding	- && sp|Q9C827|COB22_ARATH Coatomer subunit beta'-2 OS=Arabidopsis thaliana OX=3702 GN=At1g52360 PE=1 SV=1 && PF00400:WD domain, G-beta repeat|PF04053:Coatomer WD associated region	Coatomer_WDAD
Ila13G012890	1595	1530	1298	2775	2680	3498	111.4658979	105.7072147	83.60943185	186.9750329	164.8976345	233.6992986	2920.887849	1500.331523	0.961216965	1.00E-07	1.98E-06	Ila13G012890	GWHBIST00000013	26655526	26659129	+	1332	protein_coding	- && - && PF00498:FHA domain	FHA
Ila17G022300	1893	1766	2156	2558	2664	2335	80.02374199	73.80585377	84.0071491	104.2576859	99.15183641	94.36509878	2455.474202	1961.221507	0.3241383	0.005584841	0.023856984	Ila17G022300	GWHBIST00000017	44764179	44778006	+	2202	protein_coding	- && sp|Q9SZD4|PRS4A_ARATH 26S proteasome regulatory subunit 4 homolog A OS=Arabidopsis thaliana OX=3702 GN=RPT2A PE=1 SV=1 && PF00004:ATPase family associated with various cellular activities (AAA)|PF16450:Proteasomal ATPase OB C-terminal domain|PF17862:AAA+ lid domain	AAA
Ila16G006390	2291	2460	2387	2178	2080	1966	37.30941378	39.60593869	35.82985112	34.19719706	29.82325015	30.60787098	2025.553516	2413.352027	-0.252776228	0.034305916	0.099493593	Ila16G006390	GWHBIST00000016	9701833	9712860	+	5716	protein_coding	- && sp|P58223|Y4837_ARATH KH domain-containing protein At4g18375 OS=Arabidopsis thaliana OX=3702 GN=At4g18375 PE=2 SV=1 && PF00013:KH domain	KH_1
Ila20G001760	1139	1141	948	3513	3881	2721	23.52979226	23.30300245	18.05102861	69.96999101	70.58888334	53.73771342	3278.587218	1094.858516	1.582632065	3.01E-20	6.02E-18	Ila20G001760	GWHBIST00000020	1735429	1751874	+	4506	protein_coding	- && sp|Q9LK64|AB3C_ARATH ABC transporter C family member 3 OS=Arabidopsis thaliana OX=3702 GN=ABCC3 PE=1 SV=1 && PF00005:ABC transporter|PF00664:ABC transporter transmembrane region	ABC_tran
Ila04G011640	1987	1609	1347	2571	2646	3180	102.1327376	81.76266105	63.81664229	127.411457	119.7444093	156.2609637	2735.916528	1679.948422	0.703745548	0.000360994	0.002426194	Ila04G011640	GWHBIST00000004	23652856	23657435	+	1811	protein_coding	- && sp|Q55480|YZ37_SYNY3 Uncharacterized sugar kinase slr0537 OS=Synechocystis sp. (strain PCC 6803 / Kazusa) OX=1111708 GN=slr0537 PE=3 SV=1 && PF00294:pfkB family carbohydrate kinase	PfkB
Ila01G002880	1505	1447	1781	2760	3252	2585	63.7664147	60.61162087	69.55344847	112.7467108	121.3121602	104.7061809	2787.141629	1595.543901	0.804684102	1.08E-10	4.26E-09	Ila01G002880	GWHBIST00000001	3056260	3062526	-	2197	protein_coding	- && sp|Q93YR3|F10AL_ARATH FAM10 family protein At4g22670 OS=Arabidopsis thaliana OX=3702 GN=At4g22670 PE=1 SV=1 && PF18253:Hsp70-interacting protein N N-terminal domain|PF17830:STI1 domain	-
Ila0G013140	2634	2359	2802	1882	1900	1752	55.57325351	49.20507079	54.49007829	38.28326513	35.29408714	35.33787471	1799.510914	2631.452338	-0.548351323	2.45E-06	3.33E-05	Ila0G013140	GWHBIST00000182	43480	69032	+	4412	protein_coding	- && sp|P56941|NPC1_PIG NPC intracellular cholesterol transporter 1 OS=Sus scrofa OX=9823 GN=NPC1 PE=2 SV=1 && PF02460:Patched family|PF16414:Niemann-Pick C1 N terminus	-
Ila18G008740	1963	1881	1519	2146	3240	2544	96.88670078	91.7834823	69.10363458	102.1204888	140.7949825	120.0375844	2563.436276	1820.584631	0.493953881	0.006999867	0.028650649	Ila18G008740	GWHBIST00000018	16233174	16248588	-	1886	protein_coding	- && - && PF07466:Protein of unknown function (DUF1517)	-
Ila15G000510	2804	2677	2110	1874	1690	2137	125.8504618	118.783753	87.28879695	81.09343376	66.78236716	91.69329908	1860.672477	2577.961902	-0.47041893	0.012118339	0.04448123	Ila15G000510	GWHBIST00000015	592531	596277	-	2074	protein_coding	- && sp|P27774|KPPR_MESCR Phosphoribulokinase, chloroplastic OS=Mesembryanthemum crystallinum OX=3544 PE=2 SV=1 && PF00485:Phosphoribulokinase / Uridine kinase family	-
Ila03G011960	1985	2034	1976	2444	2616	2234	63.62817331	64.45724815	58.38148437	75.53173231	73.82865967	68.45865862	2368.769776	2027.816986	0.224345894	0.049465838	0.130734953	Ila03G011960	GWHBIST00000003	25633218	25675134	+	2904	protein_coding	- && sp|O22941|IDE1_ARATH Insulin-degrading enzyme-like 1, peroxisomal OS=Arabidopsis thaliana OX=3702 GN=PXM16 PE=2 SV=1 && PF05193:Peptidase M16 inactive domain|PF00675:Insulinase (Peptidase family M16)|PF16187:Middle or third domain of peptidase_M16	-
Ila14G000360	2645	2242	2064	2135	2071	2128	165.3546966	138.5665277	118.9322951	128.6850327	113.9906572	127.1799806	2062.326203	2357.843782	-0.193128909	0.217025524	0.38661423	Ila14G000360	GWHBIST00000014	370110	375821	+	1489	protein_coding	- && sp|Q8TP15|HTPX2_METAC Protease HtpX homolog 2 OS=Methanosarcina acetivorans (strain ATCC 35395 / DSM 2834 / JCM 12185 / C2A) OX=188937 GN=htpX2 PE=3 SV=1 && PF01435:Peptidase family M48	Peptidase_M48
Ila05G006800	2580	2931	3135	1436	1850	1345	99.94279515	112.2482222	111.9356896	53.63218922	63.09599799	49.80928896	1498.635893	2916.748398	-0.96050014	5.51E-12	2.86E-10	Ila05G006800	GWHBIST00000005	21409910	21430833	-	2403	protein_coding	- && sp|Q8L751|ORP1C_ARATH Oxysterol-binding protein-related protein 1C OS=Arabidopsis thaliana OX=3702 GN=ORP1C PE=2 SV=1 && PF01237:Oxysterol-binding protein|PF15413:Pleckstrin homology domain	-
Ila0G000740	2087	2515	3306	1805	2003	1549	96.94162337	115.4935408	141.5435021	80.83591244	81.915689	68.78528312	1737.593898	2656.471653	-0.612500491	0.000359931	0.002421857	Ila0G000740	GWHBIST00000230	94478	97877	-	2004	protein_coding	- && sp|P53492|ACT7_ARATH Actin-7 OS=Arabidopsis thaliana OX=3702 GN=ACT7 PE=1 SV=1 && PF00022:Actin	Actin
Ila07G002140	2174	2260	1802	2345	1973	2692	40.75101035	41.88120298	31.1338534	42.38000343	32.56148675	48.24031877	2290.781531	2115.67931	0.11470139	0.545643416	0.707122395	Ila07G002140	GWHBIST00000007	10834738	10841747	-	4966	protein_coding	- && sp|Q9ZUL3|IDD5_ARATH Protein indeterminate-domain 5, chloroplastic OS=Arabidopsis thaliana OX=3702 GN=IDD5 PE=1 SV=1 && -	-
Ila20G005750	2117	1866	1735	2427	2335	2748	330.0897837	287.643611	249.3503331	364.8549989	320.5504642	409.622898	2448.105215	1938.499742	0.336773521	0.035202983	0.101321081	Ila20G005750	GWHBIST00000020	5790150	5792298	+	597	protein_coding	- && sp|Q9C8M2|MSRB1_ARATH Peptide methionine sulfoxide reductase B1, chloroplastic OS=Arabidopsis thaliana OX=3702 GN=MSRB1 PE=1 SV=1 && PF01641:SelR domain	-
Ila18G015160	1973	2125	1697	2261	2368	2802	158.1905084	168.4395756	125.4106524	174.7805889	167.1603742	214.7720388	2420.43801	1965.351225	0.300556989	0.073284065	0.175795325	Ila18G015160	GWHBIST00000018	36404720	36410285	-	1161	protein_coding	- && sp|Q9LXC9|IPYR6_ARATH Soluble inorganic pyrophosphatase 6, chloroplastic OS=Arabidopsis thaliana OX=3702 GN=PPA6 PE=1 SV=1 && PF00719:Inorganic pyrophosphatase	Pyrophosphatase
Ila04G011850	2529	2439	2007	2067	1964	2177	100.5617846	95.87995255	73.55814413	79.24354919	68.75810932	82.75587671	2022.961817	2366.984245	-0.226537298	0.163006127	0.316763582	Ila04G011850	GWHBIST00000004	23922958	23930326	-	2341	protein_coding	- && sp|O24629|SIGA_ARATH RNA polymerase sigma factor sigA OS=Arabidopsis thaliana OX=3702 GN=SIGA PE=1 SV=1 && PF04542:Sigma-70 region 2|PF04545:Sigma-70, region 4|PF04539:Sigma-70 region 3	Sigma70_r2
Ila11G002130	1847	1792	1535	2537	2388	3081	105.2849431	100.9878775	80.65048803	139.4309345	119.848332	167.8987033	2612.314208	1754.617252	0.574218989	0.001029723	0.005958618	Ila11G002130	GWHBIST00000011	12027260	12051951	+	1633	protein_coding	- && sp|O81155|CYSKP_SOLTU Cysteine synthase, chloroplastic/chromoplastic OS=Solanum tuberosum OX=4113 PE=2 SV=1 && PF00291:Pyridoxal-phosphate dependent enzyme	PALP
Ila06G007840	3516	2962	3149	1288	951	1306	295.1228774	245.7938045	243.6272815	104.2339444	70.28017386	104.7981122	1159.983681	3258.211045	-1.490272379	1.31E-15	1.29E-13	Ila06G007840	GWHBIST00000006	8067282	8068633	-	1109	protein_coding	- && sp|P40267|H1_SOLPN Histone H1 OS=Solanum pennellii OX=28526 PE=2 SV=1 && PF00538:linker histone H1 and H5 family	-
Ila01G006150	1876	2036	1964	2326	2421	2543	157.3241563	168.7999131	151.8110239	188.0665628	178.7539581	203.8755802	2372.238034	1986.6542	0.255888763	0.030790477	0.091722238	Ila01G006150	GWHBIST00000001	7181233	7188189	-	1110	protein_coding	- && sp|Q9FHI1|MOB1A_ARATH MOB kinase activator-like 1A OS=Arabidopsis thaliana OX=3702 GN=MOB1A PE=2 SV=1 && PF03637:Mob1/phocein family	-
Ila04G004900	1838	2059	2054	2350	2291	2574	97.93505201	108.4628134	100.877042	120.7257225	107.477125	131.1165358	2350.736393	2010.25144	0.225607205	0.080338989	0.188048943	Ila04G004900	GWHBIST00000004	16622838	16627120	+	1747	protein_coding	- && sp|P30171|ACT11_SOLTU Actin-97 OS=Solanum tuberosum OX=4113 GN=AC97 PE=3 SV=1 && PF00022:Actin	Actin
Ila14G018780	2443	2718	3052	1554	1963	1427	119.56347	131.509269	137.6761844	73.32724319	84.58505644	66.76598939	1600.302195	2768.917985	-0.7908237	1.57E-08	3.75E-07	Ila14G018780	GWHBIST00000014	44914389	44919725	-	1902	protein_coding	- && sp|Q9SQY0|NAC52_ARATH NAC domain containing protein 52 OS=Arabidopsis thaliana OX=3702 GN=NAC052 PE=1 SV=1 && PF02365:No apical meristem (NAM) protein	NAM
Ila14G004750	2053	1894	2182	2059	2802	2166	44.38134709	40.47840329	43.47759627	42.9148083	53.33078323	44.76372875	2273.799805	2069.462027	0.136022219	0.311655179	0.494176887	Ila14G004750	GWHBIST00000014	5489221	5500158	-	4306	protein_coding	- && sp|A0A166B1A6|NMCP1_DAUCS Nuclear matrix constituent protein 1 OS=Daucus carota subsp. sativus OX=79200 GN=NMCP1 PE=1 SV=2 && -	-
Ila16G017030	2333	2206	2309	2232	2158	1918	127.97303	119.6302718	116.7419371	118.0421752	104.2205725	100.5792954	2051.645442	2315.396228	-0.174485028	0.154888389	0.305157369	Ila16G017030	GWHBIST00000016	42901135	42905295	-	1697	protein_coding	- && sp|Q40468|IF415_TOBAC Eukaryotic initiation factor 4A-15 OS=Nicotiana tabacum OX=4097 PE=2 SV=1 && PF00270:DEAD/DEAH box helicase|PF00271:Helicase conserved C-terminal domain	DEAD
Ila16G018600	1902	1889	1755	2422	2558	2612	117.7977752	115.661921	100.1850559	144.6238817	139.4843285	154.6521709	2469.543986	1877.905177	0.395231646	0.001533246	0.008261029	Ila16G018600	GWHBIST00000016	44732677	44739374	-	1503	protein_coding	- && sp|Q1EBV7|BASS2_ARATH Sodium/pyruvate cotransporter BASS2, chloroplastic OS=Arabidopsis thaliana OX=3702 GN=BASS2 PE=1 SV=1 && PF01758:Sodium Bile acid symporter family	-
Ila18G015390	1162	805	840	3109	3289	3923	51.14242448	35.0269992	34.0764009	131.9274615	127.4492717	165.0630117	3361.683302	952.3810752	1.819781561	1.93E-20	3.94E-18	Ila18G015390	GWHBIST00000018	36703066	36708105	+	2115	protein_coding	- && sp|Q9LMU1|EGY3_ARATH Probable zinc metallopeptidase EGY3, chloroplastic OS=Arabidopsis thaliana OX=3702 GN=EGY3 PE=1 SV=1 && -	-
Ila06G006420	2158	2306	2961	1674	2381	1640	111.9733207	118.291704	141.6122338	83.74480404	108.7729265	81.35106408	1839.904872	2498.345168	-0.441244099	0.008549182	0.033643905	Ila06G006420	GWHBIST00000006	6382094	6383887	+	1794	protein_coding	- && sp|Q9XF43|KCS6_ARATH 3-ketoacyl-CoA synthase 6 OS=Arabidopsis thaliana OX=3702 GN=CUT1 PE=1 SV=1 && PF08541:3-Oxoacyl-[acyl-carrier-protein (ACP)] synthase III C terminal|PF08392:FAE1/Type III polyketide synthase-like protein	-
Ila17G016240	2005	2185	2668	2163	2181	1918	71.61854964	77.16039705	87.84078708	74.49154189	68.59068035	65.49618741	2035.514233	2309.169183	-0.182159654	0.170899677	0.32735653	Ila17G016240	GWHBIST00000017	37476366	37489801	+	2606	protein_coding	- && sp|Q93Z16|RPN2_ARATH Dolichyl-diphosphooligosaccharide--protein glycosyltransferase subunit 2 OS=Arabidopsis thaliana OX=3702 GN=RPN2 PE=1 SV=1 && PF05817:Oligosaccharyltransferase subunit Ribophorin II	-
Ila07G010890	1843	1818	1509	2447	2637	2857	74.13913878	72.30160665	55.95136548	94.90639355	93.39650647	109.8724261	2583.838933	1753.829275	0.559164404	0.000346211	0.002348625	Ila07G010890	GWHBIST00000007	25533255	25540342	-	2314	protein_coding	- && sp|Q9FYL3|ALB4_ARATH ALBINO3-like protein 1, chloroplastic OS=Arabidopsis thaliana OX=3702 GN=ALB4 PE=1 SV=3 && -	-
Ila09G000190	2268	2323	2527	1822	2280	1886	70.72684265	71.61801804	72.63496158	54.78086593	62.60000501	56.22625806	1940.6279	2403.103164	-0.30821554	0.006686768	0.027583365	Ila09G000190	GWHBIST00000009	302265	313254	-	2985	protein_coding	- && sp|A5A7I7|CDPK4_SOLTU Calcium-dependent protein kinase 4 OS=Solanum tuberosum OX=4113 GN=CPK4 PE=2 SV=1 && PF13499:EF-hand domain pair|PF00069:Protein kinase domain	Pkinase
Ila16G018430	2303	2782	2664	1784	1732	1837	64.22338053	76.69873782	68.47510279	47.96598568	42.52510668	48.97389576	1743.339245	2617.505643	-0.586488915	7.69E-06	9.07E-05	Ila16G018430	GWHBIST00000016	44470867	44474204	+	3338	protein_coding	- && sp|Q9LHF1|LRX4_ARATH Leucine-rich repeat extensin-like protein 4 OS=Arabidopsis thaliana OX=3702 GN=LRX4 PE=1 SV=1 && -	-
Ila18G002460	2260	2494	2794	1771	2137	1645	21.33187338	23.27281272	24.307831	16.11678523	17.75919927	14.84371929	1799.285242	2545.033433	-0.500172749	9.93E-05	0.000809262	Ila18G002460	GWHBIST00000018	2683309	2723806	+	9862	protein_coding	- && sp|F4IG73|BCHC2_ARATH BEACH domain-containing protein C2 OS=Arabidopsis thaliana OX=3702 GN=BCHC2 PE=1 SV=1 && PF02138:Beige/BEACH domain|PF15787:Domain of unknown function (DUF4704)|PF14844:PH domain associated with Beige/BEACH	Beach
Ila06G005260	2181	2943	5088	718	983	1184	116.4779812	155.3854317	250.4577762	36.97020961	46.22106916	60.44997754	937.5770374	3409.301517	-1.862563606	1.76E-11	8.37E-10	Ila06G005260	GWHBIST00000006	5034458	5038548	-	1743	protein_coding	- && sp|P33629|TBA_PRUDU Tubulin alpha chain OS=Prunus dulcis OX=3755 GN=TUBA PE=2 SV=1 && PF03953:Tubulin C-terminal domain|PF00091:Tubulin/FtsZ family, GTPase domain	Tubulin
novel.676	2400	2729	2912	1852	1655	1536	105.5300004	118.6315218	118.0199204	78.51361609	64.07092537	64.56723463	1642.252379	2712.737002	-0.724263642	1.36E-07	2.62E-06	-	GWHBIST00000014	5748644	5755294	-	2117	-	- && Q8W4F0.3 RecName: Full=Protein DA1-related 1 && -	-
Ila06G007540	1583	2007	3105	1767	2679	1925	38.94173915	48.81054632	70.40366722	41.90928751	58.02370311	45.2711404	2057.597768	2241.130008	-0.123312424	0.590186273	0.741635005	Ila06G007540	GWHBIST00000006	7638397	7645769	+	3784	protein_coding	- && sp|Q9SCV9|BGAL3_ARATH Beta-galactosidase 3 OS=Arabidopsis thaliana OX=3702 GN=BGAL3 PE=2 SV=1 && PF17834:Beta-sandwich domain in beta galactosidase|PF02140:Galactose binding lectin domain|PF01301:Glycosyl hydrolases family 35	-
Ila07G002530	2256	2244	1700	2343	2025	2494	217.3939858	213.778069	150.9929255	217.6807464	171.8034013	229.7529791	2240.084977	2105.976807	0.089099674	0.636734046	0.776559663	Ila07G002530	GWHBIST00000007	12368811	12387666	+	966	protein_coding	- && sp|Q9SQ64|COR2_PAPSO Non-functional NADPH-dependent codeinone reductase 2 OS=Papaver somniferum OX=3469 GN=COR2 PE=1 SV=1 && PF00248:Aldo/keto reductase family	Aldo_ket_red
Ila06G002250	1831	2300	3148	1538	2176	2054	74.59121754	92.63157651	118.2043132	60.40807365	78.0470591	79.99375129	1869.245807	2442.371934	-0.385897591	0.052638753	0.137184979	Ila06G002250	GWHBIST00000006	2232359	2239293	+	2285	protein_coding	- && sp|A0A1P8B0B7|IQD29_ARATH Protein IQ-DOMAIN 29 OS=Arabidopsis thaliana OX=3702 GN=IQD29 PE=1 SV=1 && PF13178:Protein of unknown function (DUF4005)	-
Ila0G017350	2300	2815	2141	2469	1604	1716	203.9032242	246.7212314	174.9492854	211.0360486	125.1984411	145.4352939	1893.952497	2459.790897	-0.37722108	0.084415467	0.195382454	Ila0G017350	GWHBIST00000098	68668	72630	+	1050	protein_coding	- && sp|Q40784|AAPC_CENCI Putative glucose-6-phosphate 1-epimerase OS=Cenchrus ciliaris OX=35872 PE=2 SV=1 && PF01263:Aldose 1-epimerase	Aldose_epim
Ila17G016020	2211	1968	1910	2635	2277	2037	121.6393078	107.0390286	96.85405614	139.7671523	110.292639	107.1352775	2263.269098	2062.647189	0.133939564	0.40355609	0.584791892	Ila17G016020	GWHBIST00000017	37050095	37055910	+	1692	protein_coding	- && sp|Q9FYC2|PAO_ARATH Pheophorbide a oxygenase, chloroplastic OS=Arabidopsis thaliana OX=3702 GN=PAO PE=1 SV=1 && PF00355:Rieske [2Fe-2S] domain|PF08417:Pheophorbide a oxygenase	-
Ila04G000110	2549	2406	1922	1969	1979	2205	272.4189011	254.2113236	189.3302607	202.8861574	186.2136426	225.2849953	2003.959751	2335.272629	-0.220660695	0.19810787	0.363555772	Ila04G000110	GWHBIST00000004	790478	811137	+	871	protein_coding	- && sp|P29450|TRXF_PEA Thioredoxin F-type, chloroplastic OS=Pisum sativum OX=3888 PE=2 SV=1 && PF00085:Thioredoxin	-
Ila17G025230	1863	1899	1831	2434	2377	2625	133.0926264	134.1213675	120.5670773	167.649018	149.5094426	179.2778852	2422.358214	1892.175444	0.356343531	0.005228917	0.022685173	Ila17G025230	GWHBIST00000017	47778593	47781884	+	1303	protein_coding	- && sp|Q9SRX2|RL191_ARATH 60S ribosomal protein L19-1 OS=Arabidopsis thaliana OX=3702 GN=RPL19A PE=2 SV=1 && PF01280:Ribosomal protein L19e	-
Ila14G001740	2213	2338	1969	1868	2203	2437	110.8122008	115.7397502	90.87640347	90.18251399	97.12230116	116.6589244	2116.0774	2209.812816	-0.062436749	0.695141361	0.819766186	Ila14G001740	GWHBIST00000014	1940336	1945028	-	1859	protein_coding	- && sp|O22609|DEGP1_ARATH Protease Do-like 1, chloroplastic OS=Arabidopsis thaliana OX=3702 GN=DEGP1 PE=1 SV=2 && PF13365:Trypsin-like peptidase domain|PF13180:PDZ domain	-
Ila05G005110	1976	1936	1416	2490	2383	2809	52.85587327	51.19688442	34.91152452	64.21625268	56.12142048	71.83139882	2504.339002	1810.976492	0.467781253	0.013989959	0.049645727	Ila05G005110	GWHBIST00000005	18739372	18750753	+	3480	protein_coding	- && sp|B9DFG3|ISE2_ARATH DExH-box ATP-dependent RNA helicase DExH15 chloroplastic OS=Arabidopsis thaliana OX=3702 GN=ISE2 PE=1 SV=2 && PF08148:DSHCT (NUC185) domain|PF00270:DEAD/DEAH box helicase	DEAD
Ila15G000380	2043	2008	2028	2171	2335	2413	41.50484898	40.32979806	37.9749902	42.5235579	41.76530492	46.86450839	2250.426968	2055.782754	0.130532063	0.257946007	0.435958232	Ila15G000380	GWHBIST00000015	440282	453226	-	4582	protein_coding	- && sp|Q0J7U6|TPR2_ORYSJ Protein TOPLESS-RELATED PROTEIN 2 OS=Oryza sativa subsp. japonica OX=39947 GN=TPR2 PE=1 SV=1 && -	-
Ila05G001540	2153	2425	3311	1775	1720	1607	83.96091581	93.49249456	119.0122227	66.73763219	59.05543656	59.91082311	1659.983628	2650.06884	-0.675078511	3.51E-05	0.000334172	Ila05G001540	GWHBIST00000005	12107236	12128774	-	2387	protein_coding	- && sp|A8KYS5|TAL_FRASN Transaldolase OS=Frankia sp. (strain EAN1pec) OX=298653 GN=tal PE=3 SV=1 && PF00254:FKBP-type peptidyl-prolyl cis-trans isomerase|PF00923:Transaldolase/Fructose-6-phosphate aldolase	FKBP_C
Ila17G011590	1473	842	1219	1399	6153	1899	43.09115429	24.35170309	32.86913953	39.45866565	158.4785891	53.10881583	2991.465398	1195.317923	1.323501166	0.040991828	0.113625525	Ila17G011590	GWHBIST00000017	26729774	26746245	-	3182	protein_coding	- && sp|O24370|LOX21_SOLTU Linoleate 13S-lipoxygenase 2-1, chloroplastic OS=Solanum tuberosum OX=4113 GN=LOX2.1 PE=1 SV=1 && PF01477:PLAT/LH2 domain|PF00305:Lipoxygenase	Lipoxygenase
Ila12G011890	1609	2101	1459	1780	3127	2904	142.779584	184.3181013	119.3341127	152.2892928	244.3071905	246.3558913	2525.716917	1753.722965	0.526437632	0.021241356	0.069145488	Ila12G011890	GWHBIST00000012	30445290	30448332	+	1049	protein_coding	- && sp|Q9M812|CUT1C_ARATH Protein CURVATURE THYLAKOID 1C, chloroplastic OS=Arabidopsis thaliana OX=3702 GN=CURT1C PE=1 SV=1 && PF14159:CAAD domains of cyanobacterial aminoacyl-tRNA synthetase	-
Ila19G011550	1992	2325	2776	1749	2332	1801	46.6250488	53.80031148	59.88922257	39.4692682	48.0570172	40.29952715	1903.726404	2387.585873	-0.326684698	0.031044811	0.092298504	Ila19G011550	GWHBIST00000019	28266357	28294985	+	3977	protein_coding	- && sp|O81644|VILI2_ARATH Villin-2 OS=Arabidopsis thaliana OX=3702 GN=VLN2 PE=1 SV=2 && PF00626:Gelsolin repeat|PF02209:Villin headpiece domain	-
Ila16G015530	2612	2287	2106	2142	2166	1648	102.7212915	88.91710831	76.33872701	81.21683559	74.99702755	61.9584833	1933.87474	2375.343185	-0.296502807	0.075857843	0.180383121	Ila16G015530	GWHBIST00000016	40599343	40609871	+	2367	protein_coding	- && sp|Q5N800|NYC1_ORYSJ Probable chlorophyll(ide) b reductase NYC1, chloroplastic OS=Oryza sativa subsp. japonica OX=39947 GN=NYC1 PE=1 SV=1 && PF00106:short chain dehydrogenase	adh_short
Ila01G002370	2150	2025	2935	1275	3395	1174	89.94851563	83.75532652	113.1782293	51.42863827	125.0528574	46.95479082	1861.718869	2390.362702	-0.360439889	0.26756434	0.446588997	Ila01G002370	GWHBIST00000001	2499858	2506748	+	2225	protein_coding	- && sp|P54873|HMCS_ARATH Hydroxymethylglutaryl-CoA synthase OS=Arabidopsis thaliana OX=3702 GN=HMGS PE=1 SV=2 && PF01154:Hydroxymethylglutaryl-coenzyme A synthase N terminal|PF08540:Hydroxymethylglutaryl-coenzyme A synthase C terminal	-
Ila19G007850	2095	1852	1660	2472	2276	2598	110.9935704	97.0033303	81.06271237	126.2704013	106.1657306	131.5858572	2395.133693	1901.908235	0.332720714	0.041294143	0.114190495	Ila19G007850	GWHBIST00000019	22704529	22712804	-	1757	protein_coding	- && sp|Q8GW20|Y5390_ARATH Uncharacterized protein At5g03900, chloroplastic OS=Arabidopsis thaliana OX=3702 GN=At5g03900 PE=2 SV=2 && -	-
Ila01G000300	3661	3329	2778	1336	1100	741	123.5637338	111.0802778	86.42169586	43.47474587	32.68754317	23.90924018	1033.558775	3316.030862	-1.681828785	2.00E-13	1.38E-11	Ila01G000300	GWHBIST00000001	350485	354460	-	2758	protein_coding	- && sp|Q6R3L0|YSL1_ARATH Metal-nicotianamine transporter YSL1 OS=Arabidopsis thaliana OX=3702 GN=YSL1 PE=2 SV=2 && PF03169:OPT oligopeptide transporter protein	OPT
Ila18G012890	1315	1396	1547	3111	3085	2484	49.84056382	52.30876658	54.04390923	113.6832562	102.9462811	90.00467284	2820.196366	1436.550758	0.973100876	4.33E-13	2.83E-11	Ila18G012890	GWHBIST00000018	33057726	33067954	+	2456	protein_coding	- && sp|F4K1Z0|ECT3_ARATH YTH domain-containing protein ECT3 OS=Arabidopsis thaliana OX=3702 GN=ECT3 PE=1 SV=1 && PF04146:YT521-B-like domain	YTH
Ila17G013550	2071	2394	1817	1733	2609	2293	146.7135717	167.6664637	118.6436139	118.3662948	162.7281062	155.2925131	2147.323438	2130.773864	0.011379252	0.950726651	0.975010199	Ila17G013550	GWHBIST00000017	32240790	32254630	-	1314	protein_coding	- && sp|Q2V452|CIPK3_ARATH CBL-interacting serine/threonine-protein kinase 3 OS=Arabidopsis thaliana OX=3702 GN=CIPK3 PE=1 SV=2 && PF00069:Protein kinase domain|PF03822:NAF domain	Pkinase
Ila19G000930	1555	1431	1264	2541	2901	3203	61.20470436	55.68342145	45.85648199	96.42693791	100.5311013	120.5223586	2811.761248	1441.345623	0.964246256	2.20E-09	6.43E-08	Ila19G000930	GWHBIST00000019	1386451	1392300	-	2365	protein_coding	- && sp|Q7Y1W1|TIC56_ARATH Protein TIC 56, chloroplastic OS=Arabidopsis thaliana OX=3702 GN=TIC56 PE=1 SV=1 && PF14237:GYF domain 2	-
Ila04G011150	2700	2748	2146	1894	1519	1884	95.85541086	96.44982963	70.22339711	64.82942102	47.47980678	63.94256295	1730.599627	2577.743809	-0.574902441	0.002089586	0.01066503	Ila04G011150	GWHBIST00000004	23260127	23279033	-	2622	protein_coding	- && sp|Q7XAP4|RSH2_ORYSJ Probable GTP diphosphokinase RSH2, chloroplastic OS=Oryza sativa subsp. japonica OX=39947 GN=RSH2 PE=2 SV=1 && PF02824:TGS domain|PF04607:Region found in RelA / SpoT proteins|PF13328:HD domain	-
Ila18G012740	1806	1838	2177	2376	2367	2323	97.74056728	98.34096915	108.5962395	123.9774916	112.7856034	120.1884105	2299.153912	1962.454535	0.228210435	0.047736686	0.127113106	Ila18G012740	GWHBIST00000018	32844494	32850188	+	1720	protein_coding	- && sp|Q9FUM1|EF1G_PRUAV Elongation factor 1-gamma OS=Prunus avium OX=42229 PE=2 SV=1 && PF02798:Glutathione S-transferase, N-terminal domain|PF00043:Glutathione S-transferase, C-terminal domain|PF00647:Elongation factor 1 gamma, conserved domain	GST_N
Ila05G009980	1975	2029	1923	2227	2388	2336	53.36584985	54.20136758	47.89331106	58.01707727	56.81054461	60.34279757	2259.853971	2005.578874	0.172307274	0.131417022	0.271196733	Ila05G009980	GWHBIST00000005	26053095	26059696	-	3445	protein_coding	- && sp|Q9JIX8|ACINU_MOUSE Apoptotic chromatin condensation inducer in the nucleus OS=Mus musculus OX=10090 GN=Acin1 PE=1 SV=3 && PF02037:SAP domain|PF16294:RNSP1-SAP18 binding (RSB) motif	SAP
Ila11G009180	1778	1989	3013	2104	2081	1900	80.22654415	88.72642415	125.3097052	91.53166517	82.67166962	81.95891521	1978.995185	2273.342048	-0.200260995	0.281222905	0.461480219	Ila11G009180	GWHBIST00000011	26637452	26644501	-	2063	protein_coding	- && sp|Q9SQT8|DHQSD_ARATH Bifunctional 3-dehydroquinate dehydratase/shikimate dehydrogenase, chloroplastic OS=Arabidopsis thaliana OX=3702 GN=EMB3004 PE=1 SV=1 && PF01488:Shikimate / quinate 5-dehydrogenase|PF18317:Shikimate 5'-dehydrogenase C-terminal domain|PF08501:Shikimate dehydrogenase substrate binding domain|PF01487:Type I 3-dehydroquinase	-
Ila05G016460	1614	1628	1135	2239	2635	3607	121.7513897	121.4106166	78.91608038	162.8410108	175.0045404	260.1194405	2763.257126	1488.35564	0.892780941	0.000118073	0.000937589	Ila05G016460	GWHBIST00000005	33025566	33029650	+	1234	protein_coding	- && sp|Q9S720|PPD3_ARATH PsbP domain-containing protein 3, chloroplastic OS=Arabidopsis thaliana OX=3702 GN=PPD3 PE=1 SV=2 && PF01789:PsbP	-
Ila16G017900	2232	2234	3647	2276	1502	953	85.36093679	84.46562865	128.5582625	83.92213803	50.57468834	34.84288884	1543.511179	2719.741893	-0.817378814	0.005456344	0.023450649	Ila16G017900	GWHBIST00000016	43836669	43843357	+	2434	protein_coding	- && sp|P34105|MAOX_POPTR NADP-dependent malic enzyme OS=Populus trichocarpa OX=3694 PE=2 SV=3 && PF00390:Malic enzyme, N-terminal domain|PF03949:Malic enzyme, NAD binding domain	Malic_M
Ila19G003100	2536	2202	3797	1360	1544	1401	186.6140249	160.1932502	257.5341797	96.48798537	100.0323858	98.55744546	1397.84001	2862.880969	-1.034385264	2.98E-08	6.63E-07	Ila19G003100	GWHBIST00000019	5072745	5074409	-	1265	protein_coding	- && sp|P43390|MT2_ACTDE Metallothionein-like protein type 2 OS=Actinidia deliciosa OX=3627 GN=pKIWI504 PE=2 SV=1 && -	-
Ila05G002130	1932	2087	1771	2438	2232	2379	229.6840917	245.2890215	194.0624919	279.4452906	233.6233702	270.3799657	2297.220408	1961.739665	0.227783915	0.117872035	0.249986177	Ila05G002130	GWHBIST00000005	13576203	13585833	+	783	protein_coding	- && sp|Q9ASS6|PNSL5_ARATH Photosynthetic NDH subunit of lumenal location 5, chloroplastic OS=Arabidopsis thaliana OX=3702 GN=PNSL5 PE=1 SV=1 && PF00160:Cyclophilin type peptidyl-prolyl cis-trans isomerase/CLD	Pro_isomerase
Ila09G018160	2230	2090	2449	2213	1972	1885	259.4779346	240.4217328	262.6537482	248.2654487	202.0229833	209.6829877	1977.176755	2284.497241	-0.208615405	0.11464306	0.244840069	Ila09G018160	GWHBIST00000009	36103608	36104682	+	800	protein_coding	- && sp|P56331|IF1A_ONOVI Eukaryotic translation initiation factor 1A OS=Onobrychis viciifolia OX=3882 PE=2 SV=2 && PF01176:Translation initiation factor 1A / IF-1	-
Ila04G009770	2456	2390	2564	1629	2211	1566	29.93581788	28.80000308	28.80580623	19.14357964	23.72738124	18.24781191	1747.945133	2503.616389	-0.518080859	0.000250899	0.001781038	Ila04G009770	GWHBIST00000004	21943136	21957032	-	7637	protein_coding	- && sp|Q9LV03|GLUT1_ARATH Glutamate synthase 1 [NADH], chloroplastic OS=Arabidopsis thaliana OX=3702 GN=GLT1 PE=1 SV=2 && PF01493:GXGXG motif|PF00310:Glutamine amidotransferases class-II|PF04898:Glutamate synthase central domain|PF01645:Conserved region in glutamate synthase|PF07992:Pyridine nucleotide-disulphide oxidoreductase|PF14691:Dihydroprymidine dehydrogenase domain II, 4Fe-4S cluster	GATase_2
Ila10G006570	2304	1972	2172	2455	2031	1875	28.18645426	23.85045949	24.49159344	28.95668009	21.87591341	21.92883282	2073.285776	2180.626102	-0.072893108	0.649516424	0.786687073	Ila10G006570	GWHBIST00000010	8425994	8442588	+	7609	protein_coding	- && sp|Q38970|ACC1_ARATH Acetyl-CoA carboxylase 1 OS=Arabidopsis thaliana OX=3702 GN=ACC1 PE=1 SV=1 && PF00364:Biotin-requiring enzyme|PF02785:Biotin carboxylase C-terminal domain|PF00289:Biotin carboxylase, N-terminal domain|PF08326:Acetyl-CoA carboxylase, central region|PF01039:Carboxyl transferase domain|PF02786:Carbamoyl-phosphate synthase L chain, ATP binding domain	CPSase_L_D2
Ila06G010040	2135	2209	2580	1916	2088	1880	29.56108188	30.23778874	32.92618389	25.57745029	25.45371866	24.8849382	1911.293671	2334.482318	-0.288664159	0.008443263	0.033266599	Ila06G010040	GWHBIST00000006	11036030	11082061	-	6723	protein_coding	- && sp|F4IXW2|BIG5_ARATH Brefeldin A-inhibited guanine nucleotide-exchange protein 5 OS=Arabidopsis thaliana OX=3702 GN=BIG5 PE=1 SV=2 && PF16206:C-terminal region of Mon2 protein|PF16213:Dimerisation and cyclophilin-binding domain of Mon2|PF01369:Sec7 domain|PF12783:Guanine nucleotide exchange factor in Golgi transport N-terminal|PF09324:Domain of unknown function (DUF1981)	Sec7
Ila18G001490	2155	2118	1926	2510	2175	1916	75.13141519	73.0015562	61.89133151	84.36985755	66.76238707	63.85958207	2149.629391	2099.960828	0.033753303	0.8318529	0.907721455	Ila18G001490	GWHBIST00000018	1604758	1612012	-	2670	protein_coding	- && sp|Q8GUH1|PUB33_ARATH U-box domain-containing protein 33 OS=Arabidopsis thaliana OX=3702 GN=PUB33 PE=2 SV=2 && PF00069:Protein kinase domain|PF04564:U-box domain	Pkinase
Ila03G009580	1897	1797	1988	2580	2388	2147	42.41763749	39.7245595	40.97271793	55.62091779	47.01232913	45.89522065	2315.509097	1919.320317	0.27065611	0.035093358	0.101177147	Ila03G009580	GWHBIST00000003	21908337	21932272	-	4163	protein_coding	- && sp|Q9FPT1|UBP12_ARATH Ubiquitin C-terminal hydrolase 12 OS=Arabidopsis thaliana OX=3702 GN=UBP12 PE=1 SV=2 && PF00443:Ubiquitin carboxyl-terminal hydrolase|PF12436:ICP0-binding domain of Ubiquitin-specific protease 7|PF14533:Ubiquitin-specific protease C-terminal|PF00917:MATH domain	UCH
Ila14G013280	2159	2078	2104	1859	2584	2008	49.14972452	46.76768323	44.14824354	40.80253396	51.79159133	43.70070331	2087.021239	2144.762146	-0.039100553	0.777316939	0.871676156	Ila14G013280	GWHBIST00000014	30355315	30370123	-	4089	protein_coding	- && sp|Q9QYY8|SPAST_MOUSE Spastin OS=Mus musculus OX=10090 GN=Spast PE=1 SV=3 && PF17862:AAA+ lid domain|PF00004:ATPase family associated with various cellular activities (AAA)	AAA
Ila16G006800	2136	2118	1647	2027	2177	2683	222.9060983	218.5136267	158.4212915	203.9453229	200.021846	267.6687353	2243.515835	2003.693982	0.163184241	0.384782966	0.566581738	Ila16G006800	GWHBIST00000016	10547863	10550419	+	892	protein_coding	- && sp|Q9SUI5|PSAK_ARATH Photosystem I reaction center subunit psaK, chloroplastic OS=Arabidopsis thaliana OX=3702 GN=PSAK PE=2 SV=2 && PF01241:Photosystem I psaG / psaK	-
Ila17G015500	1732	1740	1510	2422	2422	2938	65.29987561	64.85531636	52.47357603	88.03956836	80.39645609	105.8942869	2536.443932	1688.576184	0.587065415	0.000259288	0.001831348	Ila17G015500	GWHBIST00000017	36045824	36051721	-	2469	protein_coding	- && sp|Q9FK88|INVE_ARATH Alkaline/neutral invertase E, chloroplastic OS=Arabidopsis thaliana OX=3702 GN=INVE PE=1 SV=1 && PF12899:Alkaline and neutral invertase	-
Ila20G012710	2222	1869	2451	2084	2137	1994	146.7974859	122.0719078	149.2509564	132.7429843	124.3017908	125.9377673	2020.786125	2206.188817	-0.126763962	0.330670406	0.514473431	Ila20G012710	GWHBIST00000020	20468554	20477885	-	1409	protein_coding	- && sp|P93214|14339_SOLLC 14-3-3 protein 9 OS=Solanum lycopersicum OX=4081 GN=TFT9 PE=2 SV=2 && PF00244:14-3-3 protein	-
Ila14G023570	2086	1948	1662	2285	2408	2367	100.298516	92.59787566	73.65639703	105.9267645	101.9377365	108.8014626	2295.816219	1932.497603	0.248713003	0.095919557	0.215116237	Ila14G023570	GWHBIST00000014	52078006	52084265	+	1936	protein_coding	- && sp|Q9ASX5|Y5520_ARATH Uncharacterized aarF domain-containing protein kinase At5g05200, chloroplastic OS=Arabidopsis thaliana OX=3702 GN=At5g05200 PE=1 SV=1 && PF03109:ABC1 family	ABC1
Ila16G023430	2191	1837	1654	2199	2128	2742	118.9918225	98.63152829	82.79602601	115.1434578	101.7524002	142.363436	2305.94641	1928.275746	0.258093255	0.168345942	0.32383801	Ila16G023430	GWHBIST00000016	51252631	51258133	-	1714	protein_coding	- && - && PF08241:Methyltransferase domain	Methyltransf_11
Ila18G017990	2960	2821	1884	1892	1305	1883	528.8585671	498.2907057	310.2615657	325.9179384	205.2847295	321.6284259	1663.914973	2609.35364	-0.649166094	0.007702718	0.03097465	Ila18G017990	GWHBIST00000018	39338437	39339696	+	521	protein_coding	- && sp|F4JVB8|RADL1_ARATH Protein RADIALIS-like 1 OS=Arabidopsis thaliana OX=3702 GN=RL1 PE=2 SV=1 && -	-
Ila15G002300	1972	1793	1330	2231	2445	2953	84.4758831	75.93429883	52.51419583	92.14349897	92.21530214	120.9332012	2484.30855	1732.668553	0.519992624	0.011309499	0.042152925	Ila15G002300	GWHBIST00000015	3106025	3114921	-	2173	protein_coding	- && sp|O48593|SYNO_ARATH Asparagine--tRNA ligase, chloroplastic/mitochondrial OS=Arabidopsis thaliana OX=3702 GN=SYNO PE=2 SV=3 && PF01336:OB-fold nucleic acid binding domain|PF00152:tRNA synthetases class II (D, K and N)	tRNA-synt_2
Ila17G003620	1984	1586	1955	2591	2419	2175	97.87129254	77.34793198	88.89138363	123.2311123	105.0625227	102.5720864	2338.051408	1866.328662	0.32505095	0.026687486	0.082518033	Ila17G003620	GWHBIST00000017	4629081	4637648	+	1887	protein_coding	- && sp|Q84P54|GATP1_SOLLC Gamma aminobutyrate transaminase 1, mitochondrial OS=Solanum lycopersicum OX=4081 GN=GABA-TP1 PE=1 SV=1 && PF00202:Aminotransferase class-III	Aminotran_3
Ila02G010530	2088	2284	2309	2123	2178	1726	82.9906488	89.74838301	84.59054964	81.35569494	76.21752486	65.58367204	1957.165605	2256.872292	-0.205526016	0.116063765	0.247145792	Ila02G010530	GWHBIST00000002	21042623	21047606	+	2342	protein_coding	- && sp|P37822|AROG_SOLTU Phospho-2-dehydro-3-deoxyheptonate aldolase 2, chloroplastic OS=Solanum tuberosum OX=4113 GN=SHKB PE=2 SV=1 && PF01474:Class-II DAHP synthetase family	-
Ila08G009140	2100	2132	2259	2220	2092	1902	69.19686179	69.45222636	68.60923603	70.52764428	60.69139004	59.91476897	2022.024131	2192.607093	-0.116941935	0.333093151	0.51703246	Ila08G009140	GWHBIST00000008	27042074	27055779	+	2825	protein_coding	- && sp|Q9ZTS1|SYM_ORYSJ Probable methionine--tRNA ligase OS=Oryza sativa subsp. japonica OX=39947 GN=Os06g0508700 PE=2 SV=2 && PF01588:Putative tRNA binding domain|PF09334:tRNA synthetases class I (M)	-
Ila17G019690	1899	1796	2125	2355	2396	2134	46.77713612	43.73678585	48.24661485	55.92923451	51.96294757	50.25269434	2238.011936	1963.691424	0.188537534	0.099948829	0.221305719	Ila17G019690	GWHBIST00000017	41910322	41919918	-	3779	protein_coding	- && sp|P93028|UBE11_ARATH Ubiquitin-activating enzyme E1 1 OS=Arabidopsis thaliana OX=3702 GN=UBA1 PE=1 SV=1 && PF10585:Ubiquitin-activating enzyme active site|PF00899:ThiF family|PF16191:Ubiquitin-activating enzyme E1 four-helix bundle|PF09358:Ubiquitin fold domain|PF16190:Ubiquitin-activating enzyme E1 FCCH domain	-
Ila19G013420	2034	2325	4262	977	2357	712	154.6874524	174.8070578	298.7561349	71.63710085	157.8199935	51.76549895	1289.026978	2879.68339	-1.159559952	0.036976934	0.105084467	Ila19G013420	GWHBIST00000019	31235754	31238297	-	1224	protein_coding	- && sp|P62200|CALM1_DAUCA Calmodulin-1/11/16 OS=Daucus carota OX=4039 GN=CAM-1 PE=2 SV=2 && PF13499:EF-hand domain pair	-
Ila18G008560	2073	1804	1598	2292	2533	2349	118.240077	101.7264298	84.01201964	126.0431692	127.2034504	128.0868929	2330.534351	1857.776394	0.327297877	0.032726908	0.096152915	Ila18G008560	GWHBIST00000018	15447575	15456667	+	1632	protein_coding	- && sp|Q9FR37|AMI1_ARATH Amidase 1 OS=Arabidopsis thaliana OX=3702 GN=AMI1 PE=1 SV=1 && PF01425:Amidase	Amidase
Ila17G017930	2133	2459	3203	1620	1862	1368	198.7517327	226.5220401	275.0909196	145.5373229	152.7559181	121.8603547	1571.824136	2620.113545	-0.737216907	1.05E-05	0.000118557	Ila17G017930	GWHBIST00000017	40008035	40010800	+	999	protein_coding	- && sp|Q9FVI1|ADF2_PETHY Actin-depolymerizing factor 2 OS=Petunia hybrida OX=4102 GN=ADF2 PE=2 SV=1 && PF00241:Cofilin/tropomyosin-type actin-binding protein	Cofilin_ADF
Ila02G008790	2896	2215	1961	2362	1666	1529	132.47066	100.1674783	82.67952726	104.1694414	67.09566165	66.86285249	1814.701412	2402.940939	-0.4050777	0.080297568	0.187994951	Ila02G008790	GWHBIST00000002	18660651	18663057	+	2035	protein_coding	- && sp|A0A068Q721|C7113_PRUMU Cytochrome P450 71AP13 OS=Prunus mume OX=102107 GN=CYP71AP13 PE=2 SV=1 && PF00067:Cytochrome P450	p450
Ila20G009260	2028	2087	2113	2089	2242	2069	25.19740046	25.6355184	24.19839341	25.02450681	24.52571606	24.57562381	2079.686229	2105.090111	-0.017466365	0.865041165	0.926795559	Ila20G009260	GWHBIST00000020	11206314	11223817	-	7492	protein_coding	- && sp|O23372|ATXR3_ARATH Histone-lysine N-methyltransferase ATXR3 OS=Arabidopsis thaliana OX=3702 GN=ATXR3 PE=2 SV=2 && PF14237:GYF domain 2|PF00856:SET domain	SET
Ila20G007540	1887	1724	1310	2437	2567	2696	83.05142427	75.01434363	53.14295855	103.4117799	99.4716572	113.4361151	2505.340674	1672.833087	0.582908338	0.001414448	0.007714659	Ila20G007540	GWHBIST00000020	8391280	8397377	+	2115	protein_coding	- && sp|F4IFC5|SYTM2_ARATH Threonine--tRNA ligase, chloroplastic/mitochondrial 2 OS=Arabidopsis thaliana OX=3702 GN=EMB2761 PE=2 SV=1 && PF00587:tRNA synthetase class II core domain (G, H, P, S and T)|PF07973:Threonyl and Alanyl tRNA synthetase second additional domain|PF03129:Anticodon binding domain	tRNA-synt_2b
Ila03G004670	1561	1780	1773	2640	2219	2645	85.22442425	96.07558616	89.22142534	138.9646696	106.6637321	138.0521331	2449.765592	1727.254956	0.503993955	0.000745586	0.004531723	Ila03G004670	GWHBIST00000003	7641186	7645192	-	1705	protein_coding	- && sp|Q93Y09|SCP45_ARATH Serine carboxypeptidase-like 45 OS=Arabidopsis thaliana OX=3702 GN=SCPL45 PE=2 SV=1 && PF00450:Serine carboxypeptidase	Peptidase_S10
Ila18G003510	1776	2025	1560	2152	2388	2696	79.74972893	89.89657573	64.5669246	93.1682248	94.41019111	115.7343866	2354.617808	1818.197702	0.373096588	0.027253191	0.083728321	Ila18G003510	GWHBIST00000018	4255594	4261183	-	2073	protein_coding	- && sp|Q8GZ38|UNE10_ARATH Transcription factor UNE10 OS=Arabidopsis thaliana OX=3702 GN=UNE10 PE=2 SV=1 && PF00010:Helix-loop-helix DNA-binding domain	HLH
Ila16G003070	1978	2229	3070	1466	2101	1751	123.4906851	137.5782715	176.6629738	88.24318656	115.4867781	104.5081912	1721.053701	2444.084694	-0.506011312	0.004713841	0.020878671	Ila16G003070	GWHBIST00000016	3370568	3373137	+	1491	protein_coding	- && sp|Q7XKE9|CLC1_ORYSJ Clathrin light chain 1 OS=Oryza sativa subsp. japonica OX=39947 GN=Os04g0679100 PE=2 SV=1 && PF01086:Clathrin light chain	-
Ila05G014910	1842	2077	1500	1904	2633	2636	116.4842941	129.8512427	87.43156531	116.0871074	146.5976152	159.3600379	2326.465965	1839.84704	0.338745544	0.076644482	0.181731834	Ila05G014910	GWHBIST00000005	31650553	31652495	+	1472	protein_coding	- && - && PF02190:ATP-dependent protease La (LON) substrate-binding domain	-
Ila15G017140	1730	2867	4487	832	1520	1139	67.63511985	110.8117265	161.6893737	31.36091942	52.32003778	42.57024575	1125.706829	3032.792216	-1.429757634	1.02E-06	1.53E-05	Ila15G017140	GWHBIST00000015	45459721	45469768	-	2381	protein_coding	- && sp|Q66GQ5|RWA3_ARATH Protein REDUCED WALL ACETYLATION 3 OS=Arabidopsis thaliana OX=3702 GN=RWA3 PE=1 SV=1 && PF07779:10 TM Acyl Transferase domain found in Cas1p	-
Ila13G008600	2292	2496	2495	1940	1838	1501	105.3598496	113.4323625	105.7134696	85.98081514	74.38824897	65.96255864	1716.329413	2460.807904	-0.519833126	0.000202547	0.001483876	Ila13G008600	GWHBIST00000013	19296820	19300914	+	2025	protein_coding	- && sp|Q0WWW9|XYLL3_ARATH D-xylose-proton symporter-like 3, chloroplastic OS=Arabidopsis thaliana OX=3702 GN=At5g59250 PE=1 SV=2 && PF00083:Sugar (and other) transporter	Sugar_tr
Ila12G013800	2025	1859	2095	1948	2420	2208	43.74557101	39.70272535	41.71500864	40.57301805	46.02806612	45.59995389	2133.249928	2019.686194	0.07902921	0.504747631	0.672619731	Ila12G013800	GWHBIST00000012	32431649	32456387	-	4309	protein_coding	- && sp|Q9LU41|ACA9_ARATH Calcium-transporting ATPase 9, plasma membrane-type OS=Arabidopsis thaliana OX=3702 GN=ACA9 PE=2 SV=2 && -	-
Ila01G011960	1635	1732	2289	2236	2506	2151	54.1622869	56.72297382	69.8914865	71.41514709	73.09010793	68.12020074	2237.442884	1902.301139	0.233923884	0.097597025	0.217636298	Ila01G011960	GWHBIST00000001	24428149	24471867	-	2810	protein_coding	- && - && -	-
Ila14G006230	2597	2503	2240	1593	1990	1615	141.8691333	135.1788299	112.7880875	83.90175421	95.7122096	84.34216888	1684.347621	2487.608141	-0.562284665	6.86E-05	0.000589913	Ila14G006230	GWHBIST00000014	7928267	7935953	+	1704	protein_coding	- && - && PF09750:Alternative splicing regulator	-
Ila09G011610	2333	2107	1966	1919	2088	2120	45.69119122	40.79567705	35.48955092	36.23531292	36.00365044	39.69262994	1992.282318	2171.07124	-0.123864517	0.374612096	0.556589175	Ila09G011610	GWHBIST00000009	26192040	26230700	-	4753	protein_coding	- && sp|F4I171|MD15A_ARATH Mediator of RNA polymerase II transcription subunit 15a OS=Arabidopsis thaliana OX=3702 GN=MED15A PE=1 SV=1 && PF16987:KIX domain	-
Ila0G000560	1960	1779	1802	2720	2195	2074	113.6754261	102.004266	96.33066416	152.0963258	112.0839285	114.9940961	2279.000227	1875.31586	0.28123284	0.083806551	0.194322249	Ila0G000560	GWHBIST00000124	623618	628065	+	1605	protein_coding	- && sp|P55217|CGS1_ARATH Cystathionine gamma-synthase 1, chloroplastic OS=Arabidopsis thaliana OX=3702 GN=CGS1 PE=1 SV=3 && PF01053:Cys/Met metabolism PLP-dependent enzyme	Cys_Met_Meta_PP
Ila18G008790	2007	2390	1668	1865	1963	2627	203.5121055	239.5921825	155.8971478	182.3312086	175.2513914	254.6591119	2104.727988	2059.211358	0.031582622	0.879879767	0.934189851	Ila18G008790	GWHBIST00000018	16422387	16423304	+	918	protein_coding	- && sp|P24297|RUBR_PYRFU Rubredoxin OS=Pyrococcus furiosus (strain ATCC 43587 / DSM 3638 / JCM 8422 / Vc1) OX=186497 GN=rub PE=1 SV=2 && PF00301:Rubredoxin	Rubredoxin
Ila02G000150	1894	1858	1593	2090	2351	2729	126.8383929	123.0122418	98.32994137	134.9448583	138.6186565	174.7151494	2333.421793	1812.381916	0.36466655	0.027711245	0.084633909	Ila02G000150	GWHBIST00000002	1007450	1047793	+	1390	protein_coding	- && sp|O80796|VIPP1_ARATH Membrane-associated protein VIPP1, chloroplastic OS=Arabidopsis thaliana OX=3702 GN=VIPP1 PE=1 SV=1 && PF04012:PspA/IM30 family	-
Ila02G011000	2198	2368	1808	1732	2329	2070	78.30217662	83.39878279	59.36682474	59.48854319	73.04894284	70.49734548	1986.736815	2163.192897	-0.122523114	0.470647679	0.642843292	Ila02G011000	GWHBIST00000002	21657680	21670476	-	2613	protein_coding	- && sp|Q56X46|MSL2_ARATH Mechanosensitive ion channel protein 2, chloroplastic OS=Arabidopsis thaliana OX=3702 GN=MSL2 PE=2 SV=1 && PF00924:Mechanosensitive ion channel	-
Ila18G012570	2070	2140	2770	1698	2193	1631	55.3702721	56.59159745	68.2944371	43.79084219	51.64677931	41.70772926	1787.272256	2349.092361	-0.394301572	0.008601806	0.033810827	Ila18G012570	GWHBIST00000018	32508468	32528609	-	3480	protein_coding	- && sp|Q9SE83|DRP2A_ARATH Dynamin-2A OS=Arabidopsis thaliana OX=3702 GN=DRP2A PE=1 SV=2 && PF00169:PH domain|PF01031:Dynamin central region|PF00350:Dynamin family|PF02212:Dynamin GTPase effector domain	PH
Ila05G006650	1622	1664	1758	2282	2537	2616	66.36743072	67.31151179	66.30133519	90.02416354	91.39510216	102.3288674	2417.379273	1703.722851	0.504714331	9.50E-06	0.000108775	Ila05G006650	GWHBIST00000005	21146259	21150531	-	2275	protein_coding	- && sp|Q9S825|IF5Z_ARATH Probable eukaryotic translation initiation factor 5-2 OS=Arabidopsis thaliana OX=3702 GN=At1g77840 PE=1 SV=1 && PF01873:Domain found in IF2B/IF5|PF02020:eIF4-gamma/eIF5/eIF2-epsilon	-
Ila15G004540	2034	1984	2055	2045	2309	2037	58.34743968	56.26578605	54.33528255	56.55922721	58.31671985	55.86221557	2074.797352	2053.049606	0.015345317	0.883945225	0.93649868	Ila15G004540	GWHBIST00000015	5547791	5564399	-	3245	protein_coding	- && sp|Q8H0S9|PSA_ARATH Puromycin-sensitive aminopeptidase OS=Arabidopsis thaliana OX=3702 GN=MPA1 PE=2 SV=1 && PF01433:Peptidase family M1 domain|PF17432:Domain of unknown function (DUF3458_C) ARM repeats|PF11940:Domain of unknown function (DUF3458) Ig-like fold|PF17900:Peptidase M1 N-terminal domain	-
Ila20G000020	1832	1684	1466	2339	2528	2608	62.51247006	56.80873845	46.10780088	76.95036985	75.94803818	85.07560568	2431.108165	1689.998875	0.524777776	0.00053018	0.003388443	Ila20G000020	GWHBIST00000020	82786	105410	+	2728	protein_coding	- && sp|Q6NLC1|AB2D_ARATH ABC transporter D family member 2, chloroplastic OS=Arabidopsis thaliana OX=3702 GN=ABCC2 PE=1 SV=1 && PF00005:ABC transporter|PF06472:ABC transporter transmembrane region 2	ABC_tran
Ila14G025560	1842	2148	2510	2074	2049	1833	89.39774811	103.0630755	112.281944	97.04764587	87.55424593	85.04635222	1936.763445	2188.831805	-0.176703619	0.200604267	0.366465775	Ila14G025560	GWHBIST00000014	54196387	54201137	-	1918	protein_coding	- && sp|Q9M2Z4|MSBP2_ARATH Membrane steroid-binding protein 2 OS=Arabidopsis thaliana OX=3702 GN=MSBP2 PE=1 SV=1 && PF00173:Cytochrome b5-like Heme/Steroid binding domain	-
Ila03G000460	2313	3231	2982	1270	1399	1249	94.97508018	131.160439	112.8602281	50.27789152	50.57664893	49.02896742	1272.435418	2877.90299	-1.177423331	5.92E-15	5.32E-13	Ila03G000460	GWHBIST00000003	559157	562378	-	2267	protein_coding	- && sp|Q7X996|CIPK2_ORYSJ CBL-interacting protein kinase 2 OS=Oryza sativa subsp. japonica OX=39947 GN=CIPK2 PE=2 SV=1 && PF00069:Protein kinase domain|PF03822:NAF domain	Pkinase
Ila05G003160	1620	1418	1181	2377	2487	3360	139.2425968	120.4939379	93.56345395	196.9815638	188.2050121	276.091254	2681.901355	1432.855716	0.904480708	1.11E-05	0.000124237	Ila05G003160	GWHBIST00000005	15382862	15388171	+	1083	protein_coding	- && sp|Q8LDL0|HHL1_ARATH Protein HHL1, chloroplastic OS=Arabidopsis thaliana OX=3702 GN=HHL1 PE=1 SV=1 && -	-
Ila05G001610	1923	1960	1762	2005	2357	2428	140.2859463	141.3587906	118.4786329	141.0225483	151.3884577	169.3323114	2206.386917	1911.94314	0.206789707	0.135650244	0.277463145	Ila05G001610	GWHBIST00000005	12257178	12266220	-	1276	protein_coding	- && - && PF10063:Uncharacterized integral membrane protein (DUF2301)	-
Ila15G009810	1741	1955	1891	2273	2366	2208	55.86458779	62.01781436	55.92791186	70.31962769	66.84222037	67.73188601	2225.905827	1888.224608	0.237371755	0.033890406	0.098684889	Ila15G009810	GWHBIST00000015	13535690	13548565	-	2901	protein_coding	- && sp|Q93ZT6|IF4G1_ARATH Eukaryotic translation initiation factor isoform 4G-1 OS=Arabidopsis thaliana OX=3702 GN=EIF(ISO)4G1 PE=1 SV=1 && PF02847:MA3 domain|PF02854:MIF4G domain	-
Ila06G005520	2213	2312	2537	1883	1765	1720	73.3617811	75.77189523	77.51900121	60.18358752	51.51473412	54.5096222	1747.749798	2383.352819	-0.447709204	0.000147818	0.00113492	Ila06G005520	GWHBIST00000006	5381805	5395196	-	2808	protein_coding	- && sp|Q94AM1|OOPDA_ARATH Organellar oligopeptidase A, chloroplastic/mitochondrial OS=Arabidopsis thaliana OX=3702 GN=OOP PE=1 SV=1 && PF01432:Peptidase family M3	Peptidase_M3
Ila15G001340	2419	2242	2660	1646	1887	1572	131.8358605	120.7995081	133.6221868	86.49018385	90.54571244	81.90426247	1656.218596	2470.559025	-0.576876412	5.06E-07	8.31E-06	Ila15G001340	GWHBIST00000015	1615821	1623988	-	1708	protein_coding	- && sp|Q9C5Y2|KAO2_ARATH Ent-kaurenoic acid oxidase 2 OS=Arabidopsis thaliana OX=3702 GN=KAO2 PE=1 SV=2 && PF00067:Cytochrome P450	p450
Ila06G004520	2346	2059	1731	1797	2152	2334	146.76099	127.3417574	99.81112285	108.3852046	118.5286102	139.5853208	2042.237593	2083.554607	-0.028751947	0.873171109	0.931160304	Ila06G004520	GWHBIST00000006	4339195	4343653	-	1488	protein_coding	- && sp|Q9FN15|GLD27_ARATH Protein CONSERVED IN THE GREEN LINEAGE AND DIATOMS 27, chloroplastic OS=Arabidopsis thaliana OX=3702 GN=CGLD27 PE=2 SV=1 && PF06799:Conserved in the green lineage and diatoms 27	-
Ila18G017590	1871	2197	2177	1957	2211	2004	26.09595179	30.29432487	27.98704405	26.3165818	27.15103544	26.72103916	2004.146753	2108.833604	-0.073434863	0.524665631	0.689806191	Ila18G017590	GWHBIST00000018	38974206	39021200	-	6674	protein_coding	- && sp|Q9SXA1|P4KA1_ARATH Phosphatidylinositol 4-kinase alpha 1 OS=Arabidopsis thaliana OX=3702 GN=PI4KA1 PE=1 SV=2 && PF00613:Phosphoinositide 3-kinase family, accessory domain (PIK domain)|PF00454:Phosphatidylinositol 3- and 4-kinase	PI3Ka
Ila11G009290	1404	1270	913	2726	2470	3628	71.65191962	64.07613545	42.94679392	134.1299841	110.9828762	177.0044859	2883.290582	1220.446196	1.24045855	8.61E-08	1.73E-06	Ila11G009290	GWHBIST00000011	26750526	26752349	+	1824	protein_coding	- && sp|J9RYI6|DCVR_CUCSA Divinyl chlorophyllide a 8-vinyl-reductase, chloroplastic OS=Cucumis sativus OX=3659 GN=DVR PE=1 SV=1 && PF13460:NAD(P)H-binding	-
Ila16G008570	2148	3159	3632	1299	1211	957	106.5259855	154.8826523	166.0222793	62.11117343	52.87662496	45.37216406	1127.173056	3004.419592	-1.414489918	2.29E-12	1.31E-10	Ila16G008570	GWHBIST00000016	16257678	16270785	-	1877	protein_coding	- && sp|Q940S3|UAP1_ARATH UDP-N-acetylglucosamine diphosphorylase 1 OS=Arabidopsis thaliana OX=3702 GN=GLCNAC1PUT1 PE=1 SV=1 && PF01704:UTP--glucose-1-phosphate uridylyltransferase	-
Ila07G005760	1810	2117	2574	2065	2104	1726	79.77562535	92.24532556	104.5681521	87.75078249	81.64614389	72.72583329	1914.960894	2187.55691	-0.192150112	0.203525467	0.37012902	Ila07G005760	GWHBIST00000007	19457159	19461578	-	2112	protein_coding	- && sp|Q01859|ATPBM_ORYSJ ATP synthase subunit beta, mitochondrial OS=Oryza sativa subsp. japonica OX=39947 GN=ATPB PE=1 SV=2 && PF02874:ATP synthase alpha/beta family, beta-barrel domain|PF11421:ATP synthase F1 beta subunit|PF00006:ATP synthase alpha/beta family, nucleotide-binding domain	ATP-synt_ab
Ila11G009530	1828	1873	2207	2071	2288	2107	49.88615459	50.53281382	55.51437036	54.49080643	54.97410367	54.96986176	2100.418137	1991.824535	0.076447978	0.486161494	0.655804675	Ila11G009530	GWHBIST00000011	27010787	27017804	-	3411	protein_coding	- && sp|Q94AH6|CUL1_ARATH Cullin-1 OS=Arabidopsis thaliana OX=3702 GN=CUL1 PE=1 SV=1 && PF00888:Cullin family|PF10557:Cullin protein neddylation domain	Cullin
Ila02G005930	2000	2233	2536	1993	1831	1772	86.83419268	95.84762718	101.4867332	83.42714342	69.99184144	73.5496762	1822.304959	2281.556233	-0.324495803	0.014224937	0.050294849	Ila02G005930	GWHBIST00000002	15162061	15172007	+	2144	protein_coding	- && sp|Q01859|ATPBM_ORYSJ ATP synthase subunit beta, mitochondrial OS=Oryza sativa subsp. japonica OX=39947 GN=ATPB PE=1 SV=2 && PF02874:ATP synthase alpha/beta family, beta-barrel domain|PF00006:ATP synthase alpha/beta family, nucleotide-binding domain	ATP-synt_ab
Ila18G001060	2089	2116	2465	1729	2182	1779	56.34806889	56.42715159	61.28536387	44.96503023	51.81955073	45.87465566	1843.636236	2249.447061	-0.28691723	0.017659082	0.059700029	Ila18G001060	GWHBIST00000018	1126673	1146065	-	3451	protein_coding	- && sp|X5JB51|SECAB_ARATH Exocyst complex component SEC10b OS=Arabidopsis thaliana OX=3702 GN=SEC10b PE=1 SV=1 && PF07393:Exocyst complex component Sec10	-
Ila11G005210	1884	1647	1460	2287	2305	2772	106.0946785	91.69341957	75.78178086	124.1704248	114.283079	149.232083	2399.843323	1693.446622	0.503075164	0.003760357	0.017361887	Ila11G005210	GWHBIST00000011	20845124	20851773	+	1653	protein_coding	- && sp|B9SQR9|GATB_RICCO Glutamyl-tRNA(Gln) amidotransferase subunit B, chloroplastic/mitochondrial OS=Ricinus communis OX=3988 GN=GATB PE=3 SV=1 && PF02934:GatB/GatE catalytic domain|PF02637:GatB domain	-
Ila15G003190	1796	1879	1390	2323	2208	2752	63.39890526	65.57436204	45.22613504	79.0612972	68.62348911	92.87100138	2375.507033	1720.232588	0.465722422	0.013508933	0.048300946	Ila15G003190	GWHBIST00000015	4103578	4108439	-	2637	protein_coding	- && sp|P34811|EFGC1_SOYBN Elongation factor G-1, chloroplastic OS=Glycine max OX=3847 GN=fusA1 PE=3 SV=2 && PF14492:Elongation Factor G, domain II|PF00679:Elongation factor G C-terminus|PF03144:Elongation factor Tu domain 2|PF03764:Elongation factor G, domain IV|PF00009:Elongation factor Tu GTP binding domain	GTP_EFTU
Ila02G011350	1414	1270	1122	2768	2748	3022	40.62468023	36.07249107	29.71205234	76.6736135	69.51132622	83.00252007	2780.777505	1291.084494	1.107104412	2.05E-12	1.19E-10	Ila02G011350	GWHBIST00000002	22162061	22204277	+	3240	protein_coding	- && sp|F4KE63|SYVM2_ARATH Valine--tRNA ligase, chloroplastic/mitochondrial 2 OS=Arabidopsis thaliana OX=3702 GN=EMB2247 PE=3 SV=1 && PF10458:Valyl tRNA synthetase tRNA binding arm|PF08264:Anticodon-binding domain of tRNA|PF00133:tRNA synthetases class I (I, L, M and V)	-
Ila09G012400	1563	1616	1668	2417	2595	2485	22.5641774	23.06395338	22.19503438	33.64158719	32.98345834	34.29597807	2436.896341	1637.696657	0.573383846	2.27E-08	5.21E-07	Ila09G012400	GWHBIST00000009	28038783	28070391	-	6448	protein_coding	- && sp|Q5D869|NRPE1_ARATH DNA-directed RNA polymerase V subunit 1 OS=Arabidopsis thaliana OX=3702 GN=NRPE1 PE=1 SV=1 && PF04997:RNA polymerase Rpb1, domain 1|PF04998:RNA polymerase Rpb1, domain 5|PF04983:RNA polymerase Rpb1, domain 3|PF11523:Protein of unknown function (DUF3223)|PF00623:RNA polymerase Rpb1, domain 2	-
Ila17G000840	1920	2102	2337	1908	2158	1897	38.29560933	41.4488356	42.96409975	36.6914965	37.89635987	36.17190309	1935.754088	2144.58363	-0.147850272	0.183800838	0.344916642	Ila17G000840	GWHBIST00000017	973641	985022	-	4667	protein_coding	- && sp|Q9LTT8|VCS_ARATH Enhancer of mRNA-decapping protein 4 OS=Arabidopsis thaliana OX=3702 GN=VCS PE=1 SV=1 && PF16529:WD40 region of Ge1, enhancer of mRNA-decapping protein	-
Ila13G005760	1666	1919	2205	1940	2508	2046	155.7045182	177.3099307	189.9477091	174.8103922	206.3726069	182.8050208	2103.582735	1950.563004	0.108961598	0.427987616	0.607214919	Ila13G005760	GWHBIST00000013	7310444	7316674	-	996	protein_coding	- && sp|P35135|UBC4_SOLLC Ubiquitin-conjugating enzyme E2-17 kDa OS=Solanum lycopersicum OX=4081 PE=2 SV=1 && PF00179:Ubiquitin-conjugating enzyme	UQ_con
Ila01G000520	1657	1495	1284	2535	2436	2873	53.55691798	47.77119757	38.25228128	78.99695141	69.3216119	88.77383196	2557.05749	1505.384003	0.764481084	7.22E-06	8.58E-05	Ila01G000520	GWHBIST00000001	580002	590331	-	2880	protein_coding	- && sp|O22993|FTSI1_ARATH Probable inactive ATP-dependent zinc metalloprotease FTSHI 1, chloroplastic OS=Arabidopsis thaliana OX=3702 GN=FTSHI1 PE=1 SV=1 && PF00004:ATPase family associated with various cellular activities (AAA)|PF01434:Peptidase family M41	AAA
Ila16G000940	2763	2689	2194	1552	1511	1566	233.6033799	224.7609748	170.9755892	126.5112811	112.4762949	126.5745137	1507.227643	2594.794665	-0.783687854	7.40E-07	1.16E-05	Ila16G000940	GWHBIST00000016	927377	932389	+	1101	protein_coding	- && sp|Q56X52|AOX4_ARATH Ubiquinol oxidase 4, chloroplastic/chromoplastic OS=Arabidopsis thaliana OX=3702 GN=AOX4 PE=1 SV=2 && PF01786:Alternative oxidase	AOX
Ila05G015840	1151	1156	810	2327	3438	3386	59.68929191	59.26670802	38.71732737	116.3474277	156.9731147	167.8666136	2965.634968	1059.871138	1.484764383	2.85E-12	1.57E-10	Ila05G015840	GWHBIST00000005	32513920	32520081	-	1795	protein_coding	- && sp|P48627|FAD6C_BRANA Omega-6 fatty acid desaturase, chloroplastic OS=Brassica napus OX=3708 PE=1 SV=1 && PF00487:Fatty acid desaturase	-
Ila14G022920	2151	1670	1181	2233	2179	2843	90.07131513	69.13443728	45.58219551	90.15174057	80.33441287	113.8096861	2366.684395	1704.803142	0.473384466	0.052085938	0.136142107	Ila14G022920	GWHBIST00000014	51397635	51403288	+	2223	protein_coding	- && sp|Q9SIY5|RER5_ARATH Protein RETICULATA-RELATED 5, chloroplastic OS=Arabidopsis thaliana OX=3702 GN=RER5 PE=2 SV=1 && PF11891:Protein RETICULATA-related|PF04187:Haem-binding uptake, Tiki superfamily, ChaN	-
Ila13G007960	2723	2927	2904	1476	1250	963	93.9836378	99.87555365	92.38478879	49.11682289	37.98506929	31.7751178	1200.630025	2890.997319	-1.267854968	5.28E-13	3.41E-11	Ila13G007960	GWHBIST00000013	17679303	17690074	+	2697	protein_coding	- && sp|P32811|PHSH_SOLTU Alpha-glucan phosphorylase, H isozyme OS=Solanum tuberosum OX=4113 PE=1 SV=1 && PF00343:Carbohydrate phosphorylase	-
Ila03G006920	1444	1215	1185	2853	2761	2783	54.11294347	45.01343031	40.93092539	103.0801486	91.09586658	99.70190201	2733.687865	1302.829906	1.069376633	3.85E-13	2.53E-11	Ila03G006920	GWHBIST00000003	17516172	17535148	-	2484	protein_coding	- && sp|P38094|FLUG_EMENI Protein fluG OS=Emericella nidulans (strain FGSC A4 / ATCC 38163 / CBS 112.46 / NRRL 194 / M139) OX=227321 GN=fluG PE=1 SV=1 && PF16952:Glutamine synthetase N-terminal domain|PF04909:Amidohydrolase|PF00120:Glutamine synthetase, catalytic domain	Amidohydro_2
Ila19G004930	1919	1861	2313	1938	2231	1971	54.79525229	52.53469278	60.8755415	53.35326829	56.08746695	53.80354022	1992.901991	2053.468939	-0.043277499	0.711993254	0.830431971	Ila19G004930	GWHBIST00000019	9279165	9335400	-	3260	protein_coding	- && sp|O75175|CNOT3_HUMAN CCR4-NOT transcription complex subunit 3 OS=Homo sapiens OX=9606 GN=CNOT3 PE=1 SV=1 && PF04065:Not1 N-terminal domain, CCR4-Not complex component|PF04153:NOT2 / NOT3 / NOT5 family	-
Ila15G014000	2270	2522	3269	1260	1740	1170	107.3708322	117.9335609	142.5196119	57.46061987	72.46161523	52.90571599	1347.404727	2710.787931	-1.008385377	8.09E-09	2.07E-07	Ila15G014000	GWHBIST00000015	35530628	35538785	-	1968	protein_coding	- && sp|Q9SA77|ARAE1_ARATH UDP-arabinose 4-epimerase 1 OS=Arabidopsis thaliana OX=3702 GN=MUR4 PE=1 SV=1 && PF16363:GDP-mannose 4,6 dehydratase	-
Ila05G013160	1450	1520	1555	2660	2363	2675	49.22504343	51.01449141	48.65727102	87.06408535	70.62852354	86.81567864	2510.680299	1528.914545	0.715433456	8.24E-08	1.67E-06	Ila05G013160	GWHBIST00000005	29872895	29879954	+	2742	protein_coding	- && sp|P42731|PABP2_ARATH Polyadenylate-binding protein 2 OS=Arabidopsis thaliana OX=3702 GN=PAB2 PE=1 SV=1 && PF00076:RNA recognition motif. (a.k.a. RRM, RBD, or RNP domain)|PF00658:Poly-adenylate binding protein, unique domain	RRM_1
Ila08G005220	1969	1820	1521	1978	2308	2624	65.69420617	60.03224828	46.77457126	63.62780475	67.79777754	83.69537431	2247.591102	1802.296608	0.318684094	0.072683409	0.174788446	Ila08G005220	GWHBIST00000008	11437244	11526344	-	2790	protein_coding	- && sp|A5B4D2|GUFP_VITVI Translation factor GUF1 homolog, chloroplastic OS=Vitis vinifera OX=29760 GN=VITISV_013255 PE=3 SV=1 && -	-
Ila02G005970	2057	1960	2280	2113	1866	1943	132.6027878	124.9126155	135.4729096	131.3279483	105.9078868	119.7422559	1930.363674	2125.089418	-0.138886833	0.287135123	0.467706504	Ila02G005970	GWHBIST00000002	15229177	15234212	+	1444	protein_coding	- && sp|P93340|GBLP_NICPL Guanine nucleotide-binding protein subunit beta-like protein OS=Nicotiana plumbaginifolia OX=4092 PE=2 SV=1 && PF00400:WD domain, G-beta repeat	WD40
Ila13G008090	2147	2074	2003	1885	2074	2033	38.8070269	37.06115474	33.37017813	32.84951646	33.0054288	35.12950078	1947.565608	2106.74892	-0.113230191	0.341132196	0.524837916	Ila13G008090	GWHBIST00000013	17848791	17855636	+	5150	protein_coding	- && - && -	-
Ila02G003390	1840	1669	1483	2352	2375	2493	68.26572673	61.21714891	50.71369967	84.13205786	77.57947014	88.42263358	2350.195824	1693.08037	0.473277341	0.001633143	0.008683257	Ila02G003390	GWHBIST00000002	11533864	11544211	+	2509	protein_coding	- && sp|P80093|PDS_CAPAN 15-cis-phytoene desaturase, chloroplastic/chromoplastic OS=Capsicum annuum OX=4072 GN=PDS PE=1 SV=1 && PF01593:Flavin containing amine oxidoreductase	Amino_oxidase
Ila17G011270	1351	1330	1328	2579	3037	2587	49.90457536	48.57004703	45.21497957	91.84925903	98.77069451	91.35613477	2660.989756	1355.989301	0.972868572	7.45E-18	1.08E-15	Ila17G011270	GWHBIST00000017	25351854	25360634	-	2520	protein_coding	- && sp|P28723|FTHS_SPIOL Formate--tetrahydrofolate ligase OS=Spinacia oleracea OX=3562 PE=1 SV=3 && PF01268:Formate--tetrahydrofolate ligase	-
Ila17G014420	1970	1824	2020	2150	2240	2007	40.10934415	36.71436626	37.90791974	42.20433814	40.15370768	39.06456381	2078.91228	1964.354049	0.081780942	0.457523255	0.63210342	Ila17G014420	GWHBIST00000017	33939107	33973775	-	4572	protein_coding	- && sp|Q56YN8|SMC3_ARATH Structural maintenance of chromosomes protein 3 OS=Arabidopsis thaliana OX=3702 GN=SMC3 PE=2 SV=1 && PF02463:RecF/RecN/SMC N terminal domain|PF06470:SMC proteins Flexible Hinge Domain	SMC_N
Ila18G007960	1640	2338	2324	2102	2047	1756	85.62055943	120.6731328	111.8328995	105.805008	94.09149216	87.64254837	1919.899762	2124.132951	-0.145941251	0.381920547	0.563763161	Ila18G007960	GWHBIST00000018	13237003	13240683	+	1783	protein_coding	- && sp|A3C4S4|GME1_ORYSJ GDP-mannose 3,5-epimerase 1 OS=Oryza sativa subsp. japonica OX=39947 GN=GME-1 PE=1 SV=1 && PF01370:NAD dependent epimerase/dehydratase family	Epimerase
Ila06G011390	1447	2108	2563	2626	1846	1612	61.73043553	88.90645301	100.7810003	108.0102152	69.33632302	65.74339385	1986.333187	2054.382476	-0.048777361	0.839287736	0.912185466	Ila06G011390	GWHBIST00000006	14633493	14641051	-	2182	protein_coding	- && sp|Q7Y030|OFT31_ARATH O-fucosyltransferase 31 OS=Arabidopsis thaliana OX=3702 GN=OFUT31 PE=2 SV=1 && PF10250:GDP-fucose protein O-fucosyltransferase	-
Ila06G009740	1880	1572	1548	2237	2385	2564	117.1366523	96.83210391	88.90069651	134.3817345	130.8343082	152.7246899	2338.27549	1694.480013	0.464721641	0.002096544	0.010693482	Ila06G009740	GWHBIST00000006	10639457	10647582	+	1494	protein_coding	- && sp|Q9M8R4|DJ1D_ARATH Protein DJ-1 homolog D OS=Arabidopsis thaliana OX=3702 GN=DJ1D PE=1 SV=1 && PF01965:DJ-1/PfpI family	DJ-1_PfpI
Ila14G019700	1852	1753	2241	2324	2083	1907	102.9228319	96.31291525	114.7920601	124.5220231	101.9197419	101.3159242	2055.88151	1969.759929	0.061522305	0.669652259	0.802028752	Ila14G019700	GWHBIST00000014	46831167	46835310	-	1675	protein_coding	- && sp|O49169|EF1A_MANES Elongation factor 1-alpha OS=Manihot esculenta OX=3983 GN=EF1 PE=3 SV=1 && PF03143:Elongation factor Tu C-terminal domain|PF00009:Elongation factor Tu GTP binding domain|PF03144:Elongation factor Tu domain 2	GTP_EFTU
Ila14G027500	1830	1953	2020	1892	2391	2074	56.89640809	60.02993472	57.88744457	56.71451099	65.45029924	61.64513168	2060.872737	1960.008065	0.072546087	0.531284095	0.695707026	Ila14G027500	GWHBIST00000014	56220949	56225395	+	2994	protein_coding	- && sp|Q9FJD4|IMB1_ARATH Importin subunit beta-1 OS=Arabidopsis thaliana OX=3702 GN=KPNB1 PE=1 SV=1 && PF03810:Importin-beta N-terminal domain|PF13513:HEAT-like repeat	-
Ila17G010390	1779	2016	1831	1706	2325	2483	101.1609327	113.3337534	95.96756368	93.53091934	116.4013814	134.9801383	2114.403733	1903.215036	0.151901439	0.363956524	0.547068698	Ila17G010390	GWHBIST00000017	21552397	21568890	-	1637	protein_coding	- && sp|Q9C5M0|DTC_ARATH Mitochondrial dicarboxylate/tricarboxylate transporter DTC OS=Arabidopsis thaliana OX=3702 GN=DTC PE=1 SV=1 && PF00153:Mitochondrial carrier protein	Mito_carr
Ila17G013370	1823	1687	2135	2309	2084	2077	226.2616561	207.0004278	244.2426035	276.3042246	227.7300323	246.4433262	2107.799844	1902.847342	0.147332204	0.277466821	0.45751836	Ila17G013370	GWHBIST00000017	31677400	31687542	-	750	protein_coding	- && sp|O24362|PSA3_SPIOL Proteasome subunit alpha type-3 OS=Spinacia oleracea OX=3562 GN=PAG1 PE=2 SV=1 && PF00227:Proteasome subunit|PF10584:Proteasome subunit A N-terminal signature	Proteasome
Ila17G022320	1805	2021	2259	1909	2230	1882	38.86668736	43.02278318	44.83485815	39.63195979	42.276934	38.74148041	1953.189087	2051.519338	-0.070880998	0.552047216	0.711840663	Ila17G022320	GWHBIST00000017	44802326	44821394	-	4323	protein_coding	- && sp|Q8RWY6|CLASP_ARATH CLIP-associated protein OS=Arabidopsis thaliana OX=3702 GN=CLASP PE=1 SV=1 && PF12348:CLASP N terminal	-
Ila09G018950	1777	2293	2755	1572	1931	1771	78.43256251	100.0564059	112.0804402	66.89610282	75.03943414	74.7280776	1711.169159	2294.863453	-0.423517481	0.009332692	0.036075827	Ila09G018950	GWHBIST00000009	36842856	36848620	+	2109	protein_coding	- && sp|Q8GYY5|RGAP3_ARATH Rho GTPase-activating protein 3 OS=Arabidopsis thaliana OX=3702 GN=ROPGAP3 PE=2 SV=1 && PF00620:RhoGAP domain	RhoGAP
Ila18G015920	1642	2623	5765	319	1005	736	110.3592996	174.2873799	357.1365861	20.67120364	59.47030212	47.29006049	660.9326016	3328.653142	-2.332300103	0.000223888	0.001613707	Ila18G015920	GWHBIST00000018	37308776	37312817	+	1385	protein_coding	- && - && -	-
Ila09G003740	1710	1689	1559	2249	2267	2613	41.16304507	40.19508036	34.59049268	52.19635054	48.04643893	60.13219626	2322.422247	1679.075132	0.468009429	0.001151316	0.00652087	Ila09G003740	GWHBIST00000009	3947212	3955772	-	3867	protein_coding	- && sp|P48786|PRH_PETCR Pathogenesis-related homeodomain protein OS=Petroselinum crispum OX=4043 GN=PRH PE=2 SV=1 && PF00628:PHD-finger|PF00046:Homeodomain	PHD
Ila16G009360	1549	1603	1174	2115	2855	2787	69.52295482	71.12826153	48.56732115	91.52220512	112.8187327	119.5831654	2515.836407	1469.612421	0.775859285	3.76E-05	0.000355191	Ila16G009360	GWHBIST00000016	20030790	20064053	+	2074	protein_coding	- && sp|O04196|ISOA1_ARATH Isoamylase 1, chloroplastic OS=Arabidopsis thaliana OX=3702 GN=ISA1 PE=1 SV=1 && PF00128:Alpha amylase, catalytic domain	-
Ila19G006310	1588	1498	1159	2258	2570	3006	69.43211471	64.75205795	46.70814064	95.18601206	98.93303182	125.6478737	2549.409338	1442.202202	0.822076663	1.67E-05	0.000175821	Ila19G006310	GWHBIST00000019	19466873	19479602	-	2129	protein_coding	- && sp|Q6TBX7|LUT1_ARATH Carotene epsilon-monooxygenase, chloroplastic OS=Arabidopsis thaliana OX=3702 GN=CYP97C1 PE=1 SV=1 && PF00067:Cytochrome P450	p450
Ila03G004760	1705	2712	4847	810	863	1131	102.4609839	161.1223143	268.4765798	46.93085397	45.66077036	64.97600652	914.0054876	3086.329632	-1.755791333	5.56E-09	1.49E-07	Ila03G004760	GWHBIST00000003	7984520	7987955	-	1549	protein_coding	- && sp|Q43594|TBB1_ORYSJ Tubulin beta-1 chain OS=Oryza sativa subsp. japonica OX=39947 GN=TUBB1 PE=2 SV=2 && PF03953:Tubulin C-terminal domain|PF00091:Tubulin/FtsZ family, GTPase domain	Tubulin
Ila12G002800	1799	2072	3195	2093	1354	1548	78.36320633	89.22830697	128.2776942	87.90013901	51.92756985	64.462666	1634.868431	2367.743598	-0.53460496	0.025645448	0.080140297	Ila12G002800	GWHBIST00000012	17816429	17818565	-	2137	protein_coding	- && sp|Q9LS40|ASPG1_ARATH Protein ASPARTIC PROTEASE IN GUARD CELL 1 OS=Arabidopsis thaliana OX=3702 GN=ASPG1 PE=1 SV=1 && PF14541:Xylanase inhibitor C-terminal|PF14543:Xylanase inhibitor N-terminal	-
Ila16G024040	1661	1599	1761	2429	2388	2220	40.48606148	38.53152778	39.56348156	57.0824641	51.24700869	51.73031759	2289.086913	1695.881125	0.432657066	0.000114761	0.000915683	Ila16G024040	GWHBIST00000016	52071703	52093903	-	3819	protein_coding	- && sp|B5X0I6|VIP6_ARATH Protein CTR9 homolog OS=Arabidopsis thaliana OX=3702 GN=VIP6 PE=1 SV=1 && PF00515:Tetratricopeptide repeat|PF13181:Tetratricopeptide repeat|PF13432:Tetratricopeptide repeat|PF13424:Tetratricopeptide repeat	TPR_1
Ila20G004980	1247	1546	2368	1965	2780	2151	50.20698937	61.53739158	87.87769823	76.27804976	98.54641336	82.79315055	2230.456528	1728.330463	0.367830789	0.087882467	0.201396596	Ila20G004980	GWHBIST00000020	4802893	4814042	+	2312	protein_coding	- && sp|Q8L636|NCL_ARATH Sodium/calcium exchanger NCL OS=Arabidopsis thaliana OX=3702 GN=NCL PE=2 SV=1 && PF13499:EF-hand domain pair|PF01699:Sodium/calcium exchanger protein	Na_Ca_ex
Ila14G027690	1832	2460	3522	1632	1384	1213	77.48024459	102.8566767	137.2948079	66.54646151	51.53471801	49.04362769	1377.499158	2618.028089	-0.926627105	3.11E-05	0.000302532	Ila14G027690	GWHBIST00000014	56375133	56380414	-	2201	protein_coding	- && sp|Q9FK05|PME61_ARATH Probable pectinesterase/pectinesterase inhibitor 61 OS=Arabidopsis thaliana OX=3702 GN=PME61 PE=2 SV=1 && PF01095:Pectinesterase|PF04043:Plant invertase/pectin methylesterase inhibitor	-
Ila06G008840	2295	2084	2520	1692	1902	1547	89.08797089	79.97715659	90.16462208	63.32512207	65.00476465	57.40939412	1667.951118	2327.900424	-0.480903684	7.69E-05	0.000649633	Ila06G008840	GWHBIST00000006	9382372	9389493	+	2398	protein_coding	- && sp|Q9SII8|DSK2B_ARATH Ubiquitin domain-containing protein DSK2b OS=Arabidopsis thaliana OX=3702 GN=DSK2B PE=1 SV=1 && -	-
Ila06G001990	1998	2076	2431	1816	2098	1613	37.30171211	38.31708821	41.83285347	32.68800575	34.4855428	28.78882381	1791.775651	2193.015952	-0.291490736	0.023219988	0.074108997	Ila06G001990	GWHBIST00000006	1988397	2003700	-	4986	protein_coding	- && sp|Q9LFQ3|SNL2_ARATH Paired amphipathic helix protein Sin3-like 2 OS=Arabidopsis thaliana OX=3702 GN=SNL2 PE=1 SV=2 && PF16879:C-terminal domain of Sin3a protein|PF08295:Sin3 family co-repressor|PF02671:Paired amphipathic helix repeat	PAH
Ila05G015530	2001	1824	2185	1711	2537	1749	46.45027316	41.85987096	46.75110426	38.29397881	51.85133602	38.81389847	1936.542926	2028.175408	-0.066496362	0.677295107	0.807467821	Ila05G015530	GWHBIST00000005	32259267	32265807	+	4010	protein_coding	- && sp|Q9C7F2|AB14B_ARATH ABC transporter B family member 14 OS=Arabidopsis thaliana OX=3702 GN=ABCB14 PE=3 SV=1 && PF00005:ABC transporter|PF00664:ABC transporter transmembrane region	ABC_membrane
Ila14G027660	2486	2468	2012	1710	1434	1895	64.10316587	62.91517041	47.81956038	42.51221801	32.55560765	46.71365414	1646.337343	2363.595505	-0.521798456	0.004984893	0.021863507	Ila14G027660	GWHBIST00000014	56354210	56360038	+	3610	protein_coding	- && sp|Q6F3I7|DAP4_PSEMX Dipeptidyl aminopeptidase 4 OS=Pseudoxanthomonas mexicana OX=128785 GN=dap4 PE=1 SV=1 && PF00326:Prolyl oligopeptidase family|PF00930:Dipeptidyl peptidase IV (DPP IV) N-terminal region	-
Ila10G007680	1912	2048	2820	1945	1934	1338	111.5867829	118.1644094	151.6956844	109.4419378	99.37557139	74.6512793	1693.153432	2278.374603	-0.428383694	0.024625373	0.077653818	Ila10G007680	GWHBIST00000010	10532433	10537188	-	1595	protein_coding	- && sp|P53492|ACT7_ARATH Actin-7 OS=Arabidopsis thaliana OX=3702 GN=ACT7 PE=1 SV=1 && PF00022:Actin	Actin
Ila18G004370	1780	1590	1788	2356	2290	2171	98.10155897	86.63330815	90.82861033	125.1902458	111.1193492	114.3857706	2218.145634	1742.936988	0.34778081	0.003821868	0.017555004	Ila18G004370	GWHBIST00000018	5507835	5514802	+	1689	protein_coding	- && sp|O23523|RGGA_ARATH RGG repeats nuclear RNA binding protein A OS=Arabidopsis thaliana OX=3702 GN=RGGA PE=1 SV=1 && PF09598:Stm1|PF04774:Hyaluronan / mRNA binding family	-
Ila15G012760	1820	1843	1738	2349	2232	1991	74.11066635	74.19361515	65.23164802	92.22138631	80.02060317	77.50627458	2138.006812	1828.005787	0.226056445	0.086783149	0.199567676	Ila15G012760	GWHBIST00000015	28715231	28744630	+	2286	protein_coding	- && sp|Q84KI6|SQD1_SPIOL UDP-sulfoquinovose synthase, chloroplastic OS=Spinacia oleracea OX=3562 GN=SQD1 PE=1 SV=1 && PF01370:NAD dependent epimerase/dehydratase family	Epimerase
Ila03G008690	1771	1969	1698	2237	2134	2162	107.1883984	117.8166865	94.72533615	130.5372636	113.7160946	125.0953547	2127.27338	1841.495557	0.208169081	0.127135503	0.264399505	Ila03G008690	GWHBIST00000003	20463651	20468265	-	1538	protein_coding	- && sp|Q8VYD8|ORLIK_ARATH Protein ORANGE-LIKE, chloroplastic OS=Arabidopsis thaliana OX=3702 GN=ORLIKE PE=1 SV=1 && -	-
Ila14G027600	2124	1961	1691	1940	2006	2244	82.24426151	75.06898678	60.35231715	72.42560343	68.38806594	83.06732359	2015.496592	1959.541985	0.040713239	0.79993638	0.887130516	Ila14G027600	GWHBIST00000014	56280496	56290951	-	2404	protein_coding	- && sp|P93568|SSY1_SOLTU Soluble starch synthase 1, chloroplastic/amyloplastic OS=Solanum tuberosum OX=4113 PE=2 SV=1 && PF08323:Starch synthase catalytic domain|PF00534:Glycosyl transferases group 1	Glycos_transf_1
Ila08G001030	2018	2476	2546	1795	1548	1578	75.74518616	91.87902615	88.08288346	64.95874531	51.15677192	56.62355688	1604.252219	2374.787973	-0.566132902	0.000128091	0.001002043	Ila08G001030	GWHBIST00000008	1655386	1670619	-	2480	protein_coding	- && sp|Q9ZSQ4|PGMC_POPTN Phosphoglucomutase, cytoplasmic OS=Populus tremula OX=113636 GN=PGM1 PE=2 SV=1 && PF02879:Phosphoglucomutase/phosphomannomutase, alpha/beta/alpha domain II|PF00408:Phosphoglucomutase/phosphomannomutase, C-terminal domain|PF02878:Phosphoglucomutase/phosphomannomutase, alpha/beta/alpha domain I|PF02880:Phosphoglucomutase/phosphomannomutase, alpha/beta/alpha domain III	PGM_PMM_III
[truncated: 35,580 more rows]
