# Supplementary material for: Molecular Mechanisms of Chlorophyll Deficiency in Ilex × attenuata ‘Sunny Foster’ Mutant
Source: Plants (Basel). 2024 May 7;13(10):1284. doi: 10.3390/plants13101284 (PMC11124982; doi:10.3390/plants13101284)
Supplement: Supplementary file 1 [file plants-13-01284-s001.zip › Table S4 KEGG enrichment between YT and WT..xls]

## Sheet: Table S4 KEGGenrich between YT 
KEGGID	Description	GeneRatio	BgRatio	pvalue	padj	geneID	geneName	keggID	Count	Up	Up_Gene_id	Down	Down_Gene_id
ath00500	Starch and sucrose metabolism	35/508	189/6076	4.74e-06	0.000511545	Ila01G000130/Ila0G013200/Ila17G007490/Ila08G009130/Ila15G017700/Ila08G003850/Ila17G011510/Ila15G000930/Ila05G010710/Ila10G000820/Ila10G002170/Ila10G000520/Ila16G011670/Ila07G009490/Ila10G003240/Ila17G011540/Ila15G017740/Ila20G003190/Ila16G021620/Ila03G009630/Ila19G009440/Ila05G004740/Ila05G004680/Ila18G007630/Ila03G009650/Ila09G017600/Ila08G003790/Ila16G014910/Ila06G013070/Ila16G001350/Ila06G0130…	Ila01G000130/Ila0G013200/Ila17G007490/Ila08G009130/Ila15G017700/Ila08G003850/Ila17G011510/Ila15G000930/Ila05G010710/Ila10G000820/Ila10G002170/Ila10G000520/Ila16G011670/Ila07G009490/Ila10G003240/Ila17G011540/Ila15G017740/Ila20G003190/Ila16G021620/Ila03G009630/Ila19G009440/Ila05G004740/Ila05G004680/Ila18G007630/Ila03G009650/Ila09G017600/Ila08G003790/Ila16G014910/Ila06G013070/Ila16G001350/Ila06G0130…	ath:AT1G32900/ath:AT2G36390/ath:AT5G48300/ath:AT1G04920/ath:AT1G78580/ath:AT3G29320/ath:AT5G42260/ath:AT4G17770/ath:AT4G09020/ath:AT1G76130/ath:AT4G39210/ath:AT2G36390/ath:AT1G23870/ath:AT1G69830/ath:AT4G25000/ath:AT5G44640/ath:AT1G78580/ath:AT5G54570/ath:AT1G23870/ath:AT5G20950/ath:AT5G20950/ath:AT1G23870/ath:AT1G23870/ath:AT5G04885/ath:AT5G20950/ath:AT4G00490/ath:AT1G26560/ath:AT3G60130/ath:AT5…	35	15	Ila17G011510/Ila16G011670/Ila10G003240/Ila17G011540/Ila20G003190/Ila16G021620/Ila03G009630/Ila19G009440/Ila05G004740/Ila05G004680/Ila18G007630/Ila03G009650/Ila08G003790/Ila16G014910/Ila16G001350	20	Ila01G000130/Ila0G013200/Ila17G007490/Ila08G009130/Ila15G017700/Ila08G003850/Ila15G000930/Ila05G010710/Ila10G000820/Ila10G002170/Ila10G000520/Ila07G009490/Ila15G017740/Ila09G017600/Ila06G013070/Ila06G013050/Ila09G001900/Ila17G010550/Ila08G005320/Ila09G018510
ath00906	Carotenoid biosynthesis	12/508	43/6076	0.000141287	0.00762951	Ila01G006520/Ila10G003260/Ila04G000150/Ila14G011600/Ila06G004140/Ila14G011590/Ila09G012780/Ila18G016660/Ila03G008920/Ila20G005950/Ila14G026120/Ila16G006300	Ila01G006520/Ila10G003260/Ila04G000150/Ila14G011600/Ila06G004140/Ila14G011590/Ila09G012780/Ila18G016660/Ila03G008920/Ila20G005950/Ila14G026120/Ila16G006300	ath:AT4G19170/ath:AT3G19270/ath:AT1G31800/ath:AT1G52340/ath:AT5G67030/ath:AT1G52340/ath:AT1G52340/ath:AT3G19270/ath:AT1G52340/ath:AT3G14440/ath:AT4G25700/ath:AT3G14440	12	2	Ila18G016660/Ila03G008920	10	Ila01G006520/Ila10G003260/Ila04G000150/Ila14G011600/Ila06G004140/Ila14G011590/Ila09G012780/Ila20G005950/Ila14G026120/Ila16G006300
ath04712	Circadian rhythm - plant	12/508	49/6076	0.000534388	0.019238	Ila09G019070/Ila09G019120/Ila14G027080/Ila07G003470/Ila04G010680/Ila05G009200/Ila07G000280/Ila10G007070/Ila05G010370/Ila12G005220/Ila01G000910/Ila09G008500	Ila09G019070/Ila09G019120/Ila14G027080/Ila07G003470/Ila04G010680/Ila05G009200/Ila07G000280/Ila10G007070/Ila05G010370/Ila12G005220/Ila01G000910/Ila09G008500	ath:AT5G24470/ath:AT1G01060/ath:AT5G24470/ath:AT1G68050/ath:AT5G24470/ath:AT1G22770/ath:AT5G23280/ath:AT1G22770/ath:AT4G08920/ath:AT5G61380/ath:AT4G11110/ath:AT1G09570	12	1	Ila12G005220	11	Ila09G019070/Ila09G019120/Ila14G027080/Ila07G003470/Ila04G010680/Ila05G009200/Ila07G000280/Ila10G007070/Ila05G010370/Ila01G000910/Ila09G008500
ath00196	Photosynthesis - antenna proteins	8/508	27/6076	0.00120231	0.0294823	Ila17G002860/Ila03G001450/Ila20G003640/Ila17G007530/Ila05G002490/Ila12G005360/Ila16G005220/Ila15G017070	Ila17G002860/Ila03G001450/Ila20G003640/Ila17G007530/Ila05G002490/Ila12G005360/Ila16G005220/Ila15G017070	ath:AT5G54270/ath:AT3G08940/ath:AT5G54270/ath:AT1G61520/ath:AT3G61470/ath:AT3G47470/ath:AT2G34430/ath:AT1G29930	8	0		8	Ila17G002860/Ila03G001450/Ila20G003640/Ila17G007530/Ila05G002490/Ila12G005360/Ila16G005220/Ila15G017070
ath02010	ABC transporters	16/508	84/6076	0.00136492	0.0294823	Ila09G005540/Ila09G005510/Ila0G019990/Ila05G009610/Ila13G000110/Ila02G010560/Ila12G011240/Ila09G005520/Ila09G005500/Ila15G008350/Ila03G009520/Ila16G016050/Ila15G008340/Ila02G010550/Ila19G007340/Ila12G011230	Ila09G005540/Ila09G005510/Ila0G019990/Ila05G009610/Ila13G000110/Ila02G010560/Ila12G011240/Ila09G005520/Ila09G005500/Ila15G008350/Ila03G009520/Ila16G016050/Ila15G008340/Ila02G010550/Ila19G007340/Ila12G011230	ath:AT1G17840/ath:AT1G17840/ath:AT1G17840/ath:AT1G17840/ath:AT1G02520/ath:AT1G17840/ath:AT1G15520/ath:AT1G17840/ath:AT1G17840/ath:AT1G15520/ath:AT5G06530/ath:AT3G28345/ath:AT1G15520/ath:AT1G17840/ath:AT2G36380/ath:AT1G15520	16	1	Ila13G000110	15	Ila09G005540/Ila09G005510/Ila0G019990/Ila05G009610/Ila02G010560/Ila12G011240/Ila09G005520/Ila09G005500/Ila15G008350/Ila03G009520/Ila16G016050/Ila15G008340/Ila02G010550/Ila19G007340/Ila12G011230
ath00908	Zeatin biosynthesis	17/508	96/6076	0.00224519	0.0360464	Ila06G012190/Ila14G012120/Ila06G012210/Ila06G012340/Ila19G006240/Ila08G012960/Ila03G007530/Ila06G012310/Ila10G005890/Ila04G005550/novel.483/Ila19G011920/Ila15G011320/Ila14G017180/Ila10G005920/Ila10G005910/Ila14G012150	Ila06G012190/Ila14G012120/Ila06G012210/Ila06G012340/Ila19G006240/Ila08G012960/Ila03G007530/Ila06G012310/Ila10G005890/Ila04G005550/-/Ila19G011920/Ila15G011320/Ila14G017180/Ila10G005920/Ila10G005910/Ila14G012150	ath:AT1G22360/ath:AT1G22400/ath:AT1G22400/ath:AT1G22360/ath:AT2G36800/ath:AT5G19040/ath:AT2G36780/ath:AT1G22360/ath:AT1G22360/ath:AT1G22380/ath:AT1G22400/ath:AT2G36780/ath:AT5G21482/ath:AT1G22360/ath:AT1G22370/ath:AT1G22370/ath:AT1G22370	17	5	Ila14G012120/Ila03G007530/Ila19G011920/Ila14G017180/Ila14G012150	12	Ila06G012190/Ila06G012210/Ila06G012340/Ila19G006240/Ila08G012960/Ila06G012310/Ila10G005890/Ila04G005550/novel.483/Ila15G011320/Ila10G005920/Ila10G005910
ath00460	Cyanoamino acid metabolism	15/508	81/6076	0.00255173	0.0360464	Ila06G005560/Ila17G011510/Ila05G012760/Ila05G012990/Ila06G005540/Ila14G008360/Ila17G011540/Ila20G003190/Ila03G009630/Ila19G009440/Ila18G007630/Ila03G009650/Ila08G003790/Ila16G014910/Ila06G013810	Ila06G005560/Ila17G011510/Ila05G012760/Ila05G012990/Ila06G005540/Ila14G008360/Ila17G011540/Ila20G003190/Ila03G009630/Ila19G009440/Ila18G007630/Ila03G009650/Ila08G003790/Ila16G014910/Ila06G013810	ath:AT4G37930/ath:AT5G42260/ath:AT3G16150/ath:AT3G16150/ath:AT4G37930/ath:AT4G37930/ath:AT5G44640/ath:AT5G54570/ath:AT5G20950/ath:AT5G20950/ath:AT5G04885/ath:AT5G20950/ath:AT1G26560/ath:AT3G60130/ath:AT4G39640	15	10	Ila17G011510/Ila17G011540/Ila20G003190/Ila03G009630/Ila19G009440/Ila18G007630/Ila03G009650/Ila08G003790/Ila16G014910/Ila06G013810	5	Ila06G005560/Ila05G012760/Ila05G012990/Ila06G005540/Ila14G008360
ath00071	Fatty acid degradation	14/508	74/6076	0.00285667	0.0360464	Ila15G006420/Ila11G003100/Ila10G000720/Ila10G009630/Ila05G004620/Ila08G005950/Ila08G009880/Ila03G001280/Ila0G002310/Ila05G008460/Ila0G007530/Ila10G008030/Ila0G011600/Ila08G011380	Ila15G006420/Ila11G003100/Ila10G000720/Ila10G009630/Ila05G004620/Ila08G005950/Ila08G009880/Ila03G001280/Ila0G002310/Ila05G008460/Ila0G007530/Ila10G008030/Ila0G011600/Ila08G011380	ath:AT1G32780/ath:AT3G23790/ath:AT5G42250/ath:AT1G77590/ath:AT1G23800/ath:AT1G49430/ath:AT2G33150/ath:AT3G51840/ath:AT1G77590/ath:AT1G77120/ath:AT2G33150/ath:AT1G77120/ath:AT2G33150/ath:AT4G14430	14	6	Ila08G005950/Ila08G009880/Ila03G001280/Ila0G007530/Ila0G011600/Ila08G011380	8	Ila15G006420/Ila11G003100/Ila10G000720/Ila10G009630/Ila05G004620/Ila0G002310/Ila05G008460/Ila10G008030
ath00250	Alanine, aspartate and glutamate metabolism	12/508	59/6076	0.00300386	0.0360464	Ila13G013450/Ila05G012760/Ila13G006710/Ila05G012990/Ila04G009790/Ila17G020010/Ila02G011640/Ila18G018540/Ila05G004340/Ila06G013790/Ila04G009770/Ila12G013650	Ila13G013450/Ila05G012760/Ila13G006710/Ila05G012990/Ila04G009790/Ila17G020010/Ila02G011640/Ila18G018540/Ila05G004340/Ila06G013790/Ila04G009770/Ila12G013650	ath:AT2G13360/ath:AT3G16150/ath:AT3G47340/ath:AT3G16150/ath:AT5G53460/ath:AT3G08860/ath:AT5G37600/ath:AT2G16570/ath:AT5G37600/ath:AT4G39660/ath:AT5G53460/ath:AT1G72330	12	3	Ila13G006710/Ila17G020010/Ila12G013650	9	Ila13G013450/Ila05G012760/Ila05G012990/Ila04G009790/Ila02G011640/Ila18G018540/Ila05G004340/Ila06G013790/Ila04G009770
ath00966	Glucosinolate biosynthesis	7/508	25/6076	0.00347632	0.0375442	Ila05G011930/Ila10G001670/Ila16G007860/Ila0G009050/Ila08G010450/Ila10G001590/Ila10G001630	Ila05G011930/Ila10G001670/Ila16G007860/Ila0G009050/Ila08G010450/Ila10G001590/Ila10G001630	ath:AT1G10070/ath:AT4G31500/ath:AT4G31500/ath:AT4G31500/ath:AT4G13430/ath:AT4G31500/ath:AT4G31500	7	0		7	Ila05G011930/Ila10G001670/Ila16G007860/Ila0G009050/Ila08G010450/Ila10G001590/Ila10G001630
ath00630	Glyoxylate and dicarboxylate metabolism	16/508	95/6076	0.00500352	0.0474381	Ila01G006940/Ila06G005560/Ila15G007100/Ila13G013450/Ila20G005990/Ila02G011640/Ila06G005540/Ila14G008360/Ila09G000780/Ila0G013150/Ila19G012640/Ila05G004340/Ila04G009040/Ila15G003670/Ila15G016520/novel.954	Ila01G006940/Ila06G005560/Ila15G007100/Ila13G013450/Ila20G005990/Ila02G011640/Ila06G005540/Ila14G008360/Ila09G000780/Ila0G013150/Ila19G012640/Ila05G004340/Ila04G009040/Ila15G003670/Ila15G016520/-	ath:AT4G33010/ath:AT4G37930/ath:AT4G33010/ath:AT2G13360/ath:AT3G14420/ath:AT5G37600/ath:AT4G37930/ath:AT4G37930/ath:AT1G68010/ath:AT4G35090/ath:AT5G04140/ath:AT5G37600/ath:AT3G48990/ath:AT1G12550/ath:AT5G36880/ath:AT5G36880	16	3	Ila15G003670/Ila15G016520/novel.954	13	Ila01G006940/Ila06G005560/Ila15G007100/Ila13G013450/Ila20G005990/Ila02G011640/Ila06G005540/Ila14G008360/Ila09G000780/Ila0G013150/Ila19G012640/Ila05G004340/Ila04G009040
ath03030	DNA replication	12/508	63/6076	0.0052709	0.0474381	Ila14G012430/Ila01G000720/Ila16G017220/Ila09G014910/Ila17G015440/Ila16G005800/Ila16G009290/Ila14G006470/Ila01G006220/novel.1159/Ila07G012000/novel.1807	Ila14G012430/Ila01G000720/Ila16G017220/Ila09G014910/Ila17G015440/Ila16G005800/Ila16G009290/Ila14G006470/Ila01G006220/-/Ila07G012000/-	ath:AT5G63960/ath:AT5G41880/ath:AT2G06510/ath:AT5G27740/ath:AT1G08260/ath:AT5G46280/ath:AT5G44635/ath:AT5G67100/ath:AT5G45400/ath:AT5G22010/ath:AT1G44900/ath:AT5G22010	12	3	Ila16G017220/novel.1159/novel.1807	9	Ila14G012430/Ila01G000720/Ila09G014910/Ila17G015440/Ila16G005800/Ila16G009290/Ila14G006470/Ila01G006220/Ila07G012000
ath04016	MAPK signaling pathway - plant	24/508	168/6076	0.00625734	0.051984	Ila03G000910/Ila19G010930/Ila19G010980/Ila15G007110/Ila08G011220/Ila0G013150/Ila10G002070/Ila16G024280/Ila19G010960/Ila13G014390/Ila14G024920/Ila08G011410/Ila19G011040/Ila13G006230/Ila19G010990/Ila19G000870/Ila15G004890/Ila08G012040/Ila03G000680/Ila06G010220/Ila11G006430/Ila01G001820/Ila06G010140/Ila19G011030	Ila03G000910/Ila19G010930/Ila19G010980/Ila15G007110/Ila08G011220/Ila0G013150/Ila10G002070/Ila16G024280/Ila19G010960/Ila13G014390/Ila14G024920/Ila08G011410/Ila19G011040/Ila13G006230/Ila19G010990/Ila19G000870/Ila15G004890/Ila08G012040/Ila03G000680/Ila06G010220/Ila11G006430/Ila01G001820/Ila06G010140/Ila19G011030	ath:AT2G38310/ath:AT3G12500/ath:AT3G12500/ath:AT2G26070/ath:AT3G23240/ath:AT4G35090/ath:AT1G59580/ath:AT1G72770/ath:AT3G12500/ath:AT1G63440/ath:AT5G07180/ath:AT3G23150/ath:AT3G12500/ath:AT2G38470/ath:AT3G12500/ath:AT2G38310/ath:AT4G01250/ath:AT3G43810/ath:AT2G38470/ath:AT3G23240/ath:AT3G23150/ath:AT1G63440/ath:AT3G23240/ath:AT3G12500	24	15	Ila19G010930/Ila19G010980/Ila15G007110/Ila08G011220/Ila19G010960/Ila08G011410/Ila19G011040/Ila13G006230/Ila19G010990/Ila08G012040/Ila03G000680/Ila06G010220/Ila11G006430/Ila06G010140/Ila19G011030	9	Ila03G000910/Ila0G013150/Ila10G002070/Ila16G024280/Ila13G014390/Ila14G024920/Ila19G000870/Ila15G004890/Ila01G001820
ath00052	Galactose metabolism	14/508	82/6076	0.00742571	0.0556758	Ila07G010370/Ila05G004200/Ila13G000360/Ila0G005810/Ila14G001410/Ila02G007190/novel.322/Ila02G006770/Ila12G007380/Ila04G007100/Ila05G007900/Ila17G025770/Ila12G005890/Ila16G011210	Ila07G010370/Ila05G004200/Ila13G000360/Ila0G005810/Ila14G001410/Ila02G007190/-/Ila02G006770/Ila12G007380/Ila04G007100/Ila05G007900/Ila17G025770/Ila12G005890/Ila16G011210	ath:AT1G60470/ath:AT1G60470/ath:AT2G47180/ath:AT1G60470/ath:AT5G40390/ath:AT3G47800/ath:AT5G08380/ath:AT3G17940/ath:AT5G40390/ath:AT3G56310/ath:AT5G52560/ath:AT4G01970/ath:AT3G47800/ath:AT5G08380	14	6	Ila02G007190/novel.322/Ila02G006770/Ila04G007100/Ila12G005890/Ila16G011210	8	Ila07G010370/Ila05G004200/Ila13G000360/Ila0G005810/Ila14G001410/Ila12G007380/Ila05G007900/Ila17G025770
ath00592	alpha-Linolenic acid metabolism	12/508	66/6076	0.00773275	0.0556758	Ila17G011610/Ila08G009880/Ila03G001280/Ila18G012710/Ila06G007240/Ila05G008460/Ila0G007530/Ila10G008030/Ila06G007310/Ila18G012730/Ila0G011600/Ila06G006440	Ila17G011610/Ila08G009880/Ila03G001280/Ila18G012710/Ila06G007240/Ila05G008460/Ila0G007530/Ila10G008030/Ila06G007310/Ila18G012730/Ila0G011600/Ila06G006440	ath:AT3G45140/ath:AT2G33150/ath:AT3G51840/ath:AT1G76680/ath:AT1G19640/ath:AT1G77120/ath:AT2G33150/ath:AT1G77120/ath:AT1G19640/ath:AT1G76680/ath:AT2G33150/ath:AT1G13280	12	8	Ila08G009880/Ila03G001280/Ila18G012710/Ila06G007240/Ila0G007530/Ila06G007310/Ila18G012730/Ila0G011600	4	Ila17G011610/Ila05G008460/Ila10G008030/Ila06G006440
ath00910	Nitrogen metabolism	8/508	36/6076	0.00840094	0.0567063	Ila04G009790/Ila02G011640/Ila05G006740/Ila19G012640/Ila18G016650/Ila14G001730/Ila05G004340/Ila04G009770	Ila04G009790/Ila02G011640/Ila05G006740/Ila19G012640/Ila18G016650/Ila14G001730/Ila05G004340/Ila04G009770	ath:AT5G53460/ath:AT5G37600/ath:AT1G37130/ath:AT5G04140/ath:AT2G15620/ath:AT3G01500/ath:AT5G37600/ath:AT5G53460	8	0		8	Ila04G009790/Ila02G011640/Ila05G006740/Ila19G012640/Ila18G016650/Ila14G001730/Ila05G004340/Ila04G009770
ath00010	Glycolysis / Gluconeogenesis	24/508	175/6076	0.0103155	0.0655335	Ila15G006420/Ila08G013260/Ila04G008170/Ila20G001070/Ila20G008050/Ila01G004650/Ila10G000720/Ila02G007190/Ila09G001490/Ila05G004620/Ila02G006770/Ila14G018490/Ila05G008460/Ila08G001890/Ila10G008030/Ila05G008900/Ila07G011040/Ila20G000200/Ila12G005890/Ila0G017900/Ila15G016520/Ila05G003770/Ila10G006780/novel.954	Ila15G006420/Ila08G013260/Ila04G008170/Ila20G001070/Ila20G008050/Ila01G004650/Ila10G000720/Ila02G007190/Ila09G001490/Ila05G004620/Ila02G006770/Ila14G018490/Ila05G008460/Ila08G001890/Ila10G008030/Ila05G008900/Ila07G011040/Ila20G000200/Ila12G005890/Ila0G017900/Ila15G016520/Ila05G003770/Ila10G006780/-	ath:AT1G32780/ath:AT4G15530/ath:AT2G36530/ath:AT4G26530/ath:AT1G12000/ath:AT1G32440/ath:AT5G42250/ath:AT3G47800/ath:AT4G38970/ath:AT1G23800/ath:AT3G17940/ath:AT2G36580/ath:AT1G77120/ath:AT2G01140/ath:AT1G77120/ath:AT1G43670/ath:AT1G13440/ath:AT1G16300/ath:AT3G47800/ath:AT5G52920/ath:AT5G36880/ath:AT3G01590/ath:AT1G22170/ath:AT5G36880	24	7	Ila02G007190/Ila02G006770/Ila07G011040/Ila12G005890/Ila0G017900/Ila15G016520/novel.954	17	Ila15G006420/Ila08G013260/Ila04G008170/Ila20G001070/Ila20G008050/Ila01G004650/Ila10G000720/Ila09G001490/Ila05G004620/Ila14G018490/Ila05G008460/Ila08G001890/Ila10G008030/Ila05G008900/Ila20G000200/Ila05G003770/Ila10G006780
ath00480	Glutathione metabolism	20/508	142/6076	0.0139004	0.0834024	Ila19G002290/Ila05G005330/Ila09G018170/Ila11G005010/Ila18G005290/Ila09G010220/Ila08G011030/Ila19G002270/Ila14G004420/Ila17G024140/Ila05G005400/Ila08G011050/Ila07G009660/Ila17G024820/Ila05G005310/Ila05G005290/Ila06G013810/Ila19G002300/Ila05G005380/Ila20G006140	Ila19G002290/Ila05G005330/Ila09G018170/Ila11G005010/Ila18G005290/Ila09G010220/Ila08G011030/Ila19G002270/Ila14G004420/Ila17G024140/Ila05G005400/Ila08G011050/Ila07G009660/Ila17G024820/Ila05G005310/Ila05G005290/Ila06G013810/Ila19G002300/Ila05G005380/Ila20G006140	ath:AT3G09270/ath:AT1G10370/ath:AT3G27060/ath:AT2G29420/ath:AT3G09270/ath:AT5G27380/ath:AT2G29420/ath:AT3G09270/ath:AT3G02360/ath:AT2G48150/ath:AT1G10370/ath:AT3G09270/ath:AT1G10370/ath:AT1G02920/ath:AT1G10370/ath:AT1G10370/ath:AT4G39640/ath:AT3G09270/ath:AT1G10370/ath:AT1G17180	20	18	Ila19G002290/Ila05G005330/Ila09G018170/Ila11G005010/Ila08G011030/Ila19G002270/Ila14G004420/Ila17G024140/Ila05G005400/Ila08G011050/Ila07G009660/Ila17G024820/Ila05G005310/Ila05G005290/Ila06G013810/Ila19G002300/Ila05G005380/Ila20G006140	2	Ila18G005290/Ila09G010220
ath00710	Carbon fixation in photosynthetic organisms	13/508	86/6076	0.0253994	0.144375	Ila08G013260/Ila20G001070/Ila10G000370/Ila04G005930/Ila14G024750/Ila09G001490/Ila15G000460/Ila08G001890/Ila05G008900/Ila07G011040/Ila20G005200/Ila20G000200/Ila12G013650	Ila08G013260/Ila20G001070/Ila10G000370/Ila04G005930/Ila14G024750/Ila09G001490/Ila15G000460/Ila08G001890/Ila05G008900/Ila07G011040/Ila20G005200/Ila20G000200/Ila12G013650	ath:AT4G15530/ath:AT4G26530/ath:AT1G42970/ath:AT3G55800/ath:AT2G45290/ath:AT4G38970/ath:AT1G32060/ath:AT2G01140/ath:AT1G43670/ath:AT1G13440/ath:AT3G14940/ath:AT1G16300/ath:AT1G72330	13	3	Ila07G011040/Ila20G005200/Ila12G013650	10	Ila08G013260/Ila20G001070/Ila10G000370/Ila04G005930/Ila14G024750/Ila09G001490/Ila15G000460/Ila08G001890/Ila05G008900/Ila20G000200
ath04146	Peroxisome	16/508	114/6076	0.0268863	0.145186	Ila13G013450/Ila11G003100/Ila20G005990/Ila10G009630/Ila0G013150/Ila08G005950/Ila17G003020/Ila08G009880/Ila03G001280/Ila0G002310/Ila0G007530/Ila0G011600/Ila13G011950/Ila01G012240/Ila15G011440/Ila16G000880	Ila13G013450/Ila11G003100/Ila20G005990/Ila10G009630/Ila0G013150/Ila08G005950/Ila17G003020/Ila08G009880/Ila03G001280/Ila0G002310/Ila0G007530/Ila0G011600/Ila13G011950/Ila01G012240/Ila15G011440/Ila16G000880	ath:AT2G13360/ath:AT3G23790/ath:AT3G14420/ath:AT1G77590/ath:AT4G35090/ath:AT1G49430/ath:AT1G52870/ath:AT2G33150/ath:AT3G51840/ath:AT1G77590/ath:AT2G33150/ath:AT2G33150/ath:AT4G33790/ath:AT2G24580/ath:AT2G26350/ath:AT4G05530	16	8	Ila08G005950/Ila08G009880/Ila03G001280/Ila0G007530/Ila0G011600/Ila13G011950/Ila15G011440/Ila16G000880	8	Ila13G013450/Ila11G003100/Ila20G005990/Ila10G009630/Ila0G013150/Ila17G003020/Ila0G002310/Ila01G012240
ath00260	Glycine, serine and threonine metabolism	14/508	98/6076	0.0323341	0.16629	Ila01G006940/Ila06G005560/Ila15G007100/Ila13G013450/Ila17G020010/Ila06G005540/Ila14G008360/Ila09G000780/Ila11G008370/Ila06G013790/Ila02G008570/Ila15G003670/Ila01G012240/Ila10G006780	Ila01G006940/Ila06G005560/Ila15G007100/Ila13G013450/Ila17G020010/Ila06G005540/Ila14G008360/Ila09G000780/Ila11G008370/Ila06G013790/Ila02G008570/Ila15G003670/Ila01G012240/Ila10G006780	ath:AT4G33010/ath:AT4G37930/ath:AT4G33010/ath:AT2G13360/ath:AT3G08860/ath:AT4G37930/ath:AT4G37930/ath:AT1G68010/ath:AT4G14940/ath:AT4G39660/ath:AT2G42490/ath:AT1G12550/ath:AT2G24580/ath:AT1G22170	14	4	Ila17G020010/Ila11G008370/Ila02G008570/Ila15G003670	10	Ila01G006940/Ila06G005560/Ila15G007100/Ila13G013450/Ila06G005540/Ila14G008360/Ila09G000780/Ila06G013790/Ila01G012240/Ila10G006780
ath04075	Plant hormone signal transduction	34/508	296/6076	0.0339164	0.166499	Ila09G010400/Ila05G013390/Ila03G000910/Ila09G010370/Ila05G005060/Ila03G012520/Ila08G011220/Ila15G007500/Ila20G013320/Ila16G024280/Ila09G018930/Ila18G003050/Ila08G013330/Ila12G012190/Ila16G020440/Ila02G011330/Ila06G014550/Ila08G011410/Ila15G020950/Ila02G007640/Ila09G000930/Ila19G000870/Ila18G016030/Ila08G001100/Ila16G003460/Ila02G004630/Ila20G010290/Ila06G010220/novel.1126/Ila01G009720/Ila07G01092…	Ila09G010400/Ila05G013390/Ila03G000910/Ila09G010370/Ila05G005060/Ila03G012520/Ila08G011220/Ila15G007500/Ila20G013320/Ila16G024280/Ila09G018930/Ila18G003050/Ila08G013330/Ila12G012190/Ila16G020440/Ila02G011330/Ila06G014550/Ila08G011410/Ila15G020950/Ila02G007640/Ila09G000930/Ila19G000870/Ila18G016030/Ila08G001100/Ila16G003460/Ila02G004630/Ila20G010290/Ila06G010220/-/Ila01G009720/Ila07G010920/Ila06G0…	ath:AT5G27320/ath:AT5G42750/ath:AT2G38310/ath:AT3G21510/ath:AT1G59940/ath:AT2G41370/ath:AT3G23240/ath:AT3G16360/ath:AT1G06390/ath:AT1G72770/ath:AT2G46690/ath:AT3G60690/ath:AT3G21510/ath:AT3G16500/ath:AT5G58080/ath:AT1G14920/ath:AT4G39400/ath:AT3G23150/ath:AT3G62980/ath:AT1G19050/ath:AT2G21050/ath:AT2G38310/ath:AT2G14960/ath:AT2G01570/ath:AT2G33860/ath:AT3G16360/ath:AT4G03400/ath:AT3G23240/ath:AT1…	34	10	Ila08G011220/Ila12G012190/Ila08G011410/Ila09G000930/Ila18G016030/Ila06G010220/Ila01G009720/Ila06G010810/Ila11G006430/Ila06G010140	24	Ila09G010400/Ila05G013390/Ila03G000910/Ila09G010370/Ila05G005060/Ila03G012520/Ila15G007500/Ila20G013320/Ila16G024280/Ila09G018930/Ila18G003050/Ila08G013330/Ila16G020440/Ila02G011330/Ila06G014550/Ila15G020950/Ila02G007640/Ila19G000870/Ila08G001100/Ila16G003460/Ila02G004630/Ila20G010290/novel.1126/Ila07G010920
ath00520	Amino sugar and nucleotide sugar metabolism	20/508	161/6076	0.0464196	0.21797	Ila17G007490/Ila16G020350/Ila19G010930/Ila19G010980/Ila10G002170/Ila14G026500/Ila19G010960/Ila08G009030/Ila12G008550/Ila16G020330/Ila05G007900/Ila18G014070/Ila01G002820/Ila16G012800/Ila09G016480/Ila19G011040/Ila18G000910/Ila19G010990/Ila09G001900/Ila19G011030	Ila17G007490/Ila16G020350/Ila19G010930/Ila19G010980/Ila10G002170/Ila14G026500/Ila19G010960/Ila08G009030/Ila12G008550/Ila16G020330/Ila05G007900/Ila18G014070/Ila01G002820/Ila16G012800/Ila09G016480/Ila19G011040/Ila18G000910/Ila19G010990/Ila09G001900/Ila19G011030	ath:AT5G48300/ath:AT4G19810/ath:AT3G12500/ath:AT3G12500/ath:AT4G39210/ath:AT5G24090/ath:AT3G12500/ath:AT3G23820/ath:AT3G02230/ath:AT4G19810/ath:AT5G52560/ath:AT5G64570/ath:AT1G02000/ath:AT4G19810/ath:AT4G00110/ath:AT3G12500/ath:AT5G24090/ath:AT3G12500/ath:AT4G39210/ath:AT3G12500	20	12	Ila19G010930/Ila19G010980/Ila14G026500/Ila19G010960/Ila08G009030/Ila01G002820/Ila16G012800/Ila09G016480/Ila19G011040/Ila18G000910/Ila19G010990/Ila19G011030	8	Ila17G007490/Ila16G020350/Ila10G002170/Ila12G008550/Ila16G020330/Ila05G007900/Ila18G014070/Ila09G001900
ath01210	2-Oxocarboxylic acid metabolism	10/508	69/6076	0.0593368	0.257924	Ila05G011930/Ila10G001670/Ila16G007860/Ila0G002680/Ila0G009050/Ila08G010450/Ila18G017060/Ila10G001590/Ila10G001630/Ila12G013650	Ila05G011930/Ila10G001670/Ila16G007860/Ila0G002680/Ila0G009050/Ila08G010450/Ila18G017060/Ila10G001590/Ila10G001630/Ila12G013650	ath:AT1G10070/ath:AT4G31500/ath:AT4G31500/ath:AT3G23940/ath:AT4G31500/ath:AT4G13430/ath:AT2G19940/ath:AT4G31500/ath:AT4G31500/ath:AT1G72330	10	2	Ila0G002680/Ila12G013650	8	Ila05G011930/Ila10G001670/Ila16G007860/Ila0G009050/Ila08G010450/Ila18G017060/Ila10G001590/Ila10G001630
ath00330	Arginine and proline metabolism	9/508	60/6076	0.0597046	0.257924	Ila08G003190/Ila06G003460/Ila14G004500/Ila0G017730/Ila05G004620/Ila18G018460/Ila14G004530/Ila09G013280/Ila08G013190	Ila08G003190/Ila06G003460/Ila14G004500/Ila0G017730/Ila05G004620/Ila18G018460/Ila14G004530/Ila09G013280/Ila08G013190	ath:AT3G25570/ath:AT5G15950/ath:AT3G25570/ath:AT3G25570/ath:AT1G23800/ath:AT4G34710/ath:AT3G30775/ath:AT5G13700/ath:AT5G18930	9	0		9	Ila08G003190/Ila06G003460/Ila14G004500/Ila0G017730/Ila05G004620/Ila18G018460/Ila14G004530/Ila09G013280/Ila08G013190
ath00561	Glycerolipid metabolism	10/508	71/6076	0.069546	0.271099	Ila19G008690/novel.322/Ila05G004620/Ila04G007100/Ila18G001470/Ila07G001250/Ila01G002290/Ila16G011210/Ila18G001460/Ila16G019770	Ila19G008690/-/Ila05G004620/Ila04G007100/Ila18G001470/Ila07G001250/Ila01G002290/Ila16G011210/Ila18G001460/Ila16G019770	ath:AT3G11670/ath:AT5G08380/ath:AT1G23800/ath:AT3G56310/ath:AT4G00400/ath:AT1G48300/ath:AT1G12640/ath:AT5G08380/ath:AT4G00400/ath:AT5G20410	10	6	novel.322/Ila04G007100/Ila18G001470/Ila01G002290/Ila16G011210/Ila18G001460	4	Ila19G008690/Ila05G004620/Ila07G001250/Ila16G019770
ath04141	Protein processing in endoplasmic reticulum	29/508	262/6076	0.0702499	0.271099	Ila17G004170/Ila05G015450/Ila14G021810/Ila06G010650/Ila17G009600/Ila17G025470/Ila03G004340/Ila19G002170/Ila20G007390/Ila15G011660/Ila0G000130/Ila0G006240/Ila04G005780/Ila04G005730/Ila14G027480/Ila12G008740/Ila20G006340/Ila04G005740/Ila11G001440/Ila06G008290/Ila04G007950/Ila04G010180/Ila17G018150/Ila04G005700/Ila06G008340/Ila04G005750/Ila14G026160/Ila01G003380/Ila15G002440	Ila17G004170/Ila05G015450/Ila14G021810/Ila06G010650/Ila17G009600/Ila17G025470/Ila03G004340/Ila19G002170/Ila20G007390/Ila15G011660/Ila0G000130/Ila0G006240/Ila04G005780/Ila04G005730/Ila14G027480/Ila12G008740/Ila20G006340/Ila04G005740/Ila11G001440/Ila06G008290/Ila04G007950/Ila04G010180/Ila17G018150/Ila04G005700/Ila06G008340/Ila04G005750/Ila14G026160/Ila01G003380/Ila15G002440	ath:AT4G03510/ath:AT4G24190/ath:AT3G46230/ath:AT5G37670/ath:AT4G27470/ath:AT3G62600/ath:AT5G03160/ath:AT3G46230/ath:AT3G07770/ath:AT5G12020/ath:AT4G24920/ath:AT4G25200/ath:AT5G59720/ath:AT5G59720/ath:AT5G42020/ath:AT5G51440/ath:AT1G72280/ath:AT5G59720/ath:AT3G59410/ath:AT1G64230/ath:AT5G51440/ath:AT5G42020/ath:AT1G53540/ath:AT5G59720/ath:AT1G75950/ath:AT5G59720/ath:AT5G52640/ath:AT5G51440/ath:AT4…	29	25	Ila17G004170/Ila05G015450/Ila14G021810/Ila06G010650/Ila17G009600/Ila17G025470/Ila03G004340/Ila20G007390/Ila15G011660/Ila0G000130/Ila0G006240/Ila04G005780/Ila04G005730/Ila14G027480/Ila12G008740/Ila20G006340/Ila04G005740/Ila04G007950/Ila04G010180/Ila17G018150/Ila04G005700/Ila04G005750/Ila14G026160/Ila01G003380/Ila15G002440	4	Ila19G002170/Ila11G001440/Ila06G008290/Ila06G008340
ath00603	Glycosphingolipid biosynthesis - globo and isoglobo series	3/508	12/6076	0.0724	0.271099	novel.322/Ila04G007100/Ila16G011210	-/Ila04G007100/Ila16G011210	ath:AT5G08380/ath:AT3G56310/ath:AT5G08380	3	3	novel.322/Ila04G007100/Ila16G011210	0
ath00380	Tryptophan metabolism	11/508	81/6076	0.072795	0.271099	Ila18G019420/Ila10G001670/Ila16G007860/Ila0G009050/Ila05G004620/Ila0G013150/Ila13G001870/Ila10G001590/Ila10G001630/Ila20G011670/Ila15G007960	Ila18G019420/Ila10G001670/Ila16G007860/Ila0G009050/Ila05G004620/Ila0G013150/Ila13G001870/Ila10G001590/Ila10G001630/Ila20G011670/Ila15G007960	ath:AT4G35160/ath:AT4G31500/ath:AT4G31500/ath:AT4G31500/ath:AT1G23800/ath:AT4G35090/ath:AT1G48910/ath:AT4G31500/ath:AT4G31500/ath:AT4G35160/ath:AT5G25620	11	2	Ila13G001870/Ila20G011670	9	Ila18G019420/Ila10G001670/Ila16G007860/Ila0G009050/Ila05G004620/Ila0G013150/Ila10G001590/Ila10G001630/Ila15G007960
ath00920	Sulfur metabolism	6/508	36/6076	0.0754265	0.271535	Ila08G012060/Ila11G007740/Ila06G004690/Ila16G001360/Ila15G022510/Ila12G012530	Ila08G012060/Ila11G007740/Ila06G004690/Ila16G001360/Ila15G022510/Ila12G012530	ath:AT3G22890/ath:AT3G22890/ath:AT2G14750/ath:AT4G04610/ath:AT4G04610/ath:AT5G56760	6	2	Ila06G004690/Ila12G012530	4	Ila08G012060/Ila11G007740/Ila16G001360/Ila15G022510
ath00945	Stilbenoid, diarylheptanoid and gingerol biosynthesis	4/508	20/6076	0.0800579	0.278911	Ila16G020890/Ila16G020880/Ila16G012340/Ila16G020900	Ila16G020890/Ila16G020880/Ila16G012340/Ila16G020900	ath:AT5G48930/ath:AT5G48930/ath:AT5G48930/ath:AT5G48930	4	2	Ila16G020880/Ila16G012340	2	Ila16G020890/Ila16G020900
ath00860	Porphyrin metabolism	9/508	64/6076	0.0831409	0.280601	Ila09G012370/Ila16G015530/Ila20G000460/Ila19G011500/Ila03G005560/Ila17G000820/Ila10G009460/Ila05G008020/Ila20G003850	Ila09G012370/Ila16G015530/Ila20G000460/Ila19G011500/Ila03G005560/Ila17G000820/Ila10G009460/Ila05G008020/Ila20G003850	ath:AT1G08520/ath:AT4G13250/ath:AT5G08280/ath:AT5G13630/ath:AT3G56940/ath:AT5G56090/ath:AT1G44446/ath:AT1G44000/ath:AT5G54190	9	5	Ila09G012370/Ila20G000460/Ila17G000820/Ila05G008020/Ila20G003850	4	Ila16G015530/Ila19G011500/Ila03G005560/Ila10G009460
ath00999	Biosynthesis of various plant secondary metabolites	11/508	85/6076	0.0953304	0.31199	Ila17G011510/Ila18G009170/Ila17G011540/Ila20G003190/Ila07G009830/Ila03G009630/Ila19G009440/Ila18G007630/Ila03G009650/Ila08G003790/Ila16G014910	Ila17G011510/Ila18G009170/Ila17G011540/Ila20G003190/Ila07G009830/Ila03G009630/Ila19G009440/Ila18G007630/Ila03G009650/Ila08G003790/Ila16G014910	ath:AT5G42260/ath:AT3G06350/ath:AT5G44640/ath:AT5G54570/ath:AT1G59950/ath:AT5G20950/ath:AT5G20950/ath:AT5G04885/ath:AT5G20950/ath:AT1G26560/ath:AT3G60130	11	11	Ila17G011510/Ila18G009170/Ila17G011540/Ila20G003190/Ila07G009830/Ila03G009630/Ila19G009440/Ila18G007630/Ila03G009650/Ila08G003790/Ila16G014910	0
ath00270	Cysteine and methionine metabolism	16/508	137/6076	0.106657	0.338794	Ila05G011930/Ila08G003190/Ila06G003460/Ila17G020010/Ila14G004500/Ila0G017730/Ila09G010220/novel.408/novel.720/Ila06G013790/Ila15G006300/Ila12G012530/Ila08G002810/Ila08G012250/Ila08G013190/Ila12G001650	Ila05G011930/Ila08G003190/Ila06G003460/Ila17G020010/Ila14G004500/Ila0G017730/Ila09G010220/-/-/Ila06G013790/Ila15G006300/Ila12G012530/Ila08G002810/Ila08G012250/Ila08G013190/Ila12G001650	ath:AT1G10070/ath:AT3G25570/ath:AT5G15950/ath:AT3G08860/ath:AT3G25570/ath:AT3G25570/ath:AT5G27380/ath:AT4G37770/ath:AT5G43850/ath:AT4G39660/ath:AT1G64660/ath:AT5G56760/ath:AT3G25900/ath:AT3G63250/ath:AT5G18930/ath:AT1G48420	16	4	Ila17G020010/novel.408/Ila12G012530/Ila08G002810	12	Ila05G011930/Ila08G003190/Ila06G003460/Ila14G004500/Ila0G017730/Ila09G010220/novel.720/Ila06G013790/Ila15G006300/Ila08G012250/Ila08G013190/Ila12G001650
ath00073	Cutin, suberine and wax biosynthesis	5/508	31/6076	0.112028	0.345687	Ila17G007300/Ila13G011950/Ila14G018310/Ila17G006960/Ila18G004860	Ila17G007300/Ila13G011950/Ila14G018310/Ila17G006960/Ila18G004860	ath:AT5G41040/ath:AT4G33790/ath:AT5G04660/ath:AT5G41040/ath:AT1G02205	5	4	Ila13G011950/Ila14G018310/Ila17G006960/Ila18G004860	1	Ila17G007300
ath01200	Carbon metabolism	35/508	344/6076	0.126198	0.378593	Ila01G006940/Ila08G013260/Ila06G005560/Ila04G008170/Ila20G001070/Ila15G007100/Ila13G013450/Ila10G000370/Ila20G005990/Ila04G005930/Ila14G024750/Ila01G004650/Ila06G005540/Ila10G000720/Ila14G008360/Ila09G000780/Ila09G001490/Ila0G013150/Ila15G000460/Ila14G018490/Ila03G001280/Ila08G001890/Ila05G008900/Ila07G011040/Ila14G004420/Ila14G020650/Ila20G005200/Ila20G000200/Ila12G013650/Ila12G012530/Ila15G0036…	Ila01G006940/Ila08G013260/Ila06G005560/Ila04G008170/Ila20G001070/Ila15G007100/Ila13G013450/Ila10G000370/Ila20G005990/Ila04G005930/Ila14G024750/Ila01G004650/Ila06G005540/Ila10G000720/Ila14G008360/Ila09G000780/Ila09G001490/Ila0G013150/Ila15G000460/Ila14G018490/Ila03G001280/Ila08G001890/Ila05G008900/Ila07G011040/Ila14G004420/Ila14G020650/Ila20G005200/Ila20G000200/Ila12G013650/Ila12G012530/Ila15G0036…	ath:AT4G33010/ath:AT4G15530/ath:AT4G37930/ath:AT2G36530/ath:AT4G26530/ath:AT4G33010/ath:AT2G13360/ath:AT1G42970/ath:AT3G14420/ath:AT3G55800/ath:AT2G45290/ath:AT1G32440/ath:AT4G37930/ath:AT5G42250/ath:AT4G37930/ath:AT1G68010/ath:AT4G38970/ath:AT4G35090/ath:AT1G32060/ath:AT2G36580/ath:AT3G51840/ath:AT2G01140/ath:AT1G43670/ath:AT1G13440/ath:AT3G02360/ath:AT3G55410/ath:AT3G14940/ath:AT1G16300/ath:AT1…	35	10	Ila03G001280/Ila07G011040/Ila14G004420/Ila20G005200/Ila12G013650/Ila12G012530/Ila15G003670/Ila0G017900/Ila15G016520/novel.954	25	Ila01G006940/Ila08G013260/Ila06G005560/Ila04G008170/Ila20G001070/Ila15G007100/Ila13G013450/Ila10G000370/Ila20G005990/Ila04G005930/Ila14G024750/Ila01G004650/Ila06G005540/Ila10G000720/Ila14G008360/Ila09G000780/Ila09G001490/Ila0G013150/Ila15G000460/Ila14G018490/Ila08G001890/Ila05G008900/Ila14G020650/Ila20G000200/Ila10G006780
ath00062	Fatty acid elongation	5/508	33/6076	0.13692	0.399658	Ila09G015990/Ila06G006420/Ila16G018840/Ila11G007510/Ila16G015070	Ila09G015990/Ila06G006420/Ila16G018840/Ila11G007510/Ila16G015070	ath:AT3G60340/ath:AT1G68530/ath:AT2G26640/ath:AT2G26640/ath:AT2G26640	5	5	Ila09G015990/Ila06G006420/Ila16G018840/Ila11G007510/Ila16G015070	0
ath00053	Ascorbate and aldarate metabolism	7/508	56/6076	0.184032	0.507536	Ila17G013670/Ila05G004620/Ila14G001620/Ila08G009030/Ila05G007900/Ila01G002820/Ila09G016480	Ila17G013670/Ila05G004620/Ila14G001620/Ila08G009030/Ila05G007900/Ila01G002820/Ila09G016480	ath:AT5G21100/ath:AT1G23800/ath:AT3G27820/ath:AT3G23820/ath:AT5G52560/ath:AT1G02000/ath:AT4G00110	7	3	Ila08G009030/Ila01G002820/Ila09G016480	4	Ila17G013670/Ila05G004620/Ila14G001620/Ila05G007900
ath00740	Riboflavin metabolism	4/508	27/6076	0.184878	0.507536	Ila02G006610/Ila01G001720/Ila07G002770/Ila07G001430	Ila02G006610/Ila01G001720/Ila07G002770/Ila07G001430	ath:AT3G17790/ath:AT4G11570/ath:AT1G14700/ath:AT4G21470	4	0		4	Ila02G006610/Ila01G001720/Ila07G002770/Ila07G001430
ath00350	Tyrosine metabolism	6/508	47/6076	0.195838	0.507536	Ila15G006420/Ila10G000720/Ila11G008370/Ila05G008460/Ila10G008030/Ila02G008570	Ila15G006420/Ila10G000720/Ila11G008370/Ila05G008460/Ila10G008030/Ila02G008570	ath:AT1G32780/ath:AT5G42250/ath:AT4G14940/ath:AT1G77120/ath:AT1G77120/ath:AT2G42490	6	2	Ila11G008370/Ila02G008570	4	Ila15G006420/Ila10G000720/Ila05G008460/Ila10G008030
ath00261	Monobactam biosynthesis	2/508	10/6076	0.201224	0.507536	Ila08G012060/Ila11G007740	Ila08G012060/Ila11G007740	ath:AT3G22890/ath:AT3G22890	2	0		2	Ila08G012060/Ila11G007740
ath01040	Biosynthesis of unsaturated fatty acids	4/508	28/6076	0.202474	0.507536	Ila08G009880/Ila03G001280/Ila0G007530/Ila0G011600	Ila08G009880/Ila03G001280/Ila0G007530/Ila0G011600	ath:AT2G33150/ath:AT3G51840/ath:AT2G33150/ath:AT2G33150	4	4	Ila08G009880/Ila03G001280/Ila0G007530/Ila0G011600	0
ath00941	Flavonoid biosynthesis	5/508	38/6076	0.208178	0.507536	Ila16G020890/Ila16G020880/Ila16G012340/Ila16G002080/Ila16G020900	Ila16G020890/Ila16G020880/Ila16G012340/Ila16G002080/Ila16G020900	ath:AT5G48930/ath:AT5G48930/ath:AT5G48930/ath:AT1G61720/ath:AT5G48930	5	3	Ila16G020880/Ila16G012340/Ila16G002080	2	Ila16G020890/Ila16G020900
ath00902	Monoterpenoid biosynthesis	3/508	19/6076	0.208544	0.507536	Ila17G005210/Ila15G004090/Ila20G009190	Ila17G005210/Ila15G004090/Ila20G009190	ath:AT3G25830/ath:AT3G61220/ath:AT3G25830	3	2	Ila17G005210/Ila15G004090	1	Ila20G009190
ath01212	Fatty acid metabolism	11/508	100/6076	0.211983	0.507536	Ila11G003100/Ila16G024770/Ila10G009630/Ila09G015990/Ila08G005950/Ila08G009880/Ila03G001280/Ila0G002310/Ila0G007530/Ila0G011600/Ila02G002930	Ila11G003100/Ila16G024770/Ila10G009630/Ila09G015990/Ila08G005950/Ila08G009880/Ila03G001280/Ila0G002310/Ila0G007530/Ila0G011600/Ila02G002930	ath:AT3G23790/ath:AT1G74960/ath:AT1G77590/ath:AT3G60340/ath:AT1G49430/ath:AT2G33150/ath:AT3G51840/ath:AT1G77590/ath:AT2G33150/ath:AT2G33150/ath:AT1G74960	11	6	Ila09G015990/Ila08G005950/Ila08G009880/Ila03G001280/Ila0G007530/Ila0G011600	5	Ila11G003100/Ila16G024770/Ila10G009630/Ila0G002310/Ila02G002930
ath04626	Plant-pathogen interaction	23/508	231/6076	0.216173	0.507536	Ila14G006050/Ila05G006750/Ila05G015450/Ila06G006420/Ila20G007390/Ila16G019290/Ila16G018840/Ila14G006140/Ila10G001860/Ila10G003190/Ila11G007510/Ila09G002950/Ila14G001940/Ila12G009760/Ila13G006230/Ila17G020960/Ila13G010800/Ila19G004690/Ila15G004890/Ila14G026160/Ila08G012040/Ila03G000680/Ila16G015070	Ila14G006050/Ila05G006750/Ila05G015450/Ila06G006420/Ila20G007390/Ila16G019290/Ila16G018840/Ila14G006140/Ila10G001860/Ila10G003190/Ila11G007510/Ila09G002950/Ila14G001940/Ila12G009760/Ila13G006230/Ila17G020960/Ila13G010800/Ila19G004690/Ila15G004890/Ila14G026160/Ila08G012040/Ila03G000680/Ila16G015070	ath:AT2G15680/ath:AT1G62820/ath:AT4G24190/ath:AT1G68530/ath:AT3G07770/ath:AT4G12860/ath:AT2G26640/ath:AT2G15680/ath:AT4G16190/ath:AT4G12860/ath:AT2G26640/ath:AT2G15680/ath:AT5G14870/ath:AT4G30560/ath:AT2G38470/ath:AT3G07490/ath:AT2G28260/ath:AT2G28260/ath:AT4G01250/ath:AT5G52640/ath:AT3G43810/ath:AT2G38470/ath:AT2G26640	23	14	Ila05G015450/Ila06G006420/Ila20G007390/Ila16G018840/Ila10G001860/Ila11G007510/Ila12G009760/Ila13G006230/Ila17G020960/Ila19G004690/Ila14G026160/Ila08G012040/Ila03G000680/Ila16G015070	9	Ila14G006050/Ila05G006750/Ila16G019290/Ila14G006140/Ila10G003190/Ila09G002950/Ila14G001940/Ila13G010800/Ila15G004890
ath00564	Glycerophospholipid metabolism	12/508	112/6076	0.224305	0.515425	Ila06G000540/Ila01G008940/Ila09G006010/Ila13G007560/Ila18G009800/Ila12G011030/Ila18G001470/Ila12G004390/Ila03G012330/Ila12G000880/Ila01G002290/Ila18G001460	Ila06G000540/Ila01G008940/Ila09G006010/Ila13G007560/Ila18G009800/Ila12G011030/Ila18G001470/Ila12G004390/Ila03G012330/Ila12G000880/Ila01G002290/Ila18G001460	ath:AT3G02040/ath:AT5G20060/ath:AT5G57190/ath:AT1G07230/ath:AT3G16785/ath:AT3G15650/ath:AT4G00400/ath:AT5G08030/ath:AT2G41540/ath:AT1G73600/ath:AT1G12640/ath:AT4G00400	12	5	Ila18G001470/Ila12G004390/Ila03G012330/Ila01G002290/Ila18G001460	7	Ila06G000540/Ila01G008940/Ila09G006010/Ila13G007560/Ila18G009800/Ila12G011030/Ila12G000880
ath00750	Vitamin B6 metabolism	3/508	20/6076	0.231217	0.520239	Ila02G004160/Ila13G007490/Ila12G012520	Ila02G004160/Ila13G007490/Ila12G012520	ath:AT1G17710/ath:AT5G01410/ath:AT1G17710	3	0		3	Ila02G004160/Ila13G007490/Ila12G012520
ath03430	Mismatch repair	6/508	52/6076	0.265737	0.585707	Ila14G012430/Ila16G017220/Ila09G014910/Ila01G006220/novel.1159/novel.1807	Ila14G012430/Ila16G017220/Ila09G014910/Ila01G006220/-/-	ath:AT5G63960/ath:AT2G06510/ath:AT5G27740/ath:AT5G45400/ath:AT5G22010/ath:AT5G22010	6	3	Ila16G017220/novel.1159/novel.1807	3	Ila14G012430/Ila09G014910/Ila01G006220
ath00590	Arachidonic acid metabolism	2/508	13/6076	0.297379	0.629744	Ila06G013810/Ila02G006800	Ila06G013810/Ila02G006800	ath:AT4G39640/ath:AT5G42150	2	2	Ila06G013810/Ila02G006800	0
ath00905	Brassinosteroid biosynthesis	2/508	13/6076	0.297379	0.629744	Ila12G012570/Ila14G022260	Ila12G012570/Ila14G022260	ath:AT3G13730/ath:AT5G05690	2	0		2	Ila12G012570/Ila14G022260
ath00280	Valine, leucine and isoleucine degradation	7/508	66/6076	0.312811	0.639203	Ila05G011930/Ila17G020010/Ila05G004620/Ila08G009880/Ila0G007530/Ila06G013790/Ila0G011600	Ila05G011930/Ila17G020010/Ila05G004620/Ila08G009880/Ila0G007530/Ila06G013790/Ila0G011600	ath:AT1G10070/ath:AT3G08860/ath:AT1G23800/ath:AT2G33150/ath:AT2G33150/ath:AT4G39660/ath:AT2G33150	7	4	Ila17G020010/Ila08G009880/Ila0G007530/Ila0G011600	3	Ila05G011930/Ila05G004620/Ila06G013790
ath00904	Diterpenoid biosynthesis	4/508	34/6076	0.315693	0.639203	Ila06G014970/Ila04G008400/Ila14G015070/Ila14G025080	Ila06G014970/Ila04G008400/Ila14G015070/Ila14G025080	ath:AT5G51810/ath:AT5G51810/ath:AT1G15550/ath:AT4G25420	4	1	Ila14G025080	3	Ila06G014970/Ila04G008400/Ila14G015070
ath00620	Pyruvate metabolism	12/508	122/6076	0.320905	0.639203	Ila15G006420/Ila08G013260/Ila01G004650/Ila10G000720/Ila05G004620/Ila14G018490/Ila05G008460/Ila10G008030/Ila20G005200/Ila0G017900/Ila15G016520/novel.954	Ila15G006420/Ila08G013260/Ila01G004650/Ila10G000720/Ila05G004620/Ila14G018490/Ila05G008460/Ila10G008030/Ila20G005200/Ila0G017900/Ila15G016520/-	ath:AT1G32780/ath:AT4G15530/ath:AT1G32440/ath:AT5G42250/ath:AT1G23800/ath:AT2G36580/ath:AT1G77120/ath:AT1G77120/ath:AT3G14940/ath:AT5G52920/ath:AT5G36880/ath:AT5G36880	12	4	Ila20G005200/Ila0G017900/Ila15G016520/novel.954	8	Ila15G006420/Ila08G013260/Ila01G004650/Ila10G000720/Ila05G004620/Ila14G018490/Ila05G008460/Ila10G008030
ath00061	Fatty acid biosynthesis	6/508	56/6076	0.32552	0.639203	Ila11G003100/Ila16G024770/Ila10G009630/Ila08G005950/Ila0G002310/Ila02G002930	Ila11G003100/Ila16G024770/Ila10G009630/Ila08G005950/Ila0G002310/Ila02G002930	ath:AT3G23790/ath:AT1G74960/ath:AT1G77590/ath:AT1G49430/ath:AT1G77590/ath:AT1G74960	6	1	Ila08G005950	5	Ila11G003100/Ila16G024770/Ila10G009630/Ila0G002310/Ila02G002930
ath00290	Valine, leucine and isoleucine biosynthesis	3/508	25/6076	0.348646	0.660592	Ila05G011930/Ila0G002680/Ila08G010450	Ila05G011930/Ila0G002680/Ila08G010450	ath:AT1G10070/ath:AT3G23940/ath:AT4G13430	3	1	Ila0G002680	2	Ila05G011930/Ila08G010450
ath00450	Selenocompound metabolism	3/508	25/6076	0.348646	0.660592	Ila08G012060/Ila11G007740/Ila15G006300	Ila08G012060/Ila11G007740/Ila15G006300	ath:AT3G22890/ath:AT3G22890/ath:AT1G64660	3	0		3	Ila08G012060/Ila11G007740/Ila15G006300
ath00195	Photosynthesis	9/508	92/6076	0.362098	0.674251	Ila0G015340/Ila06G008090/Ila06G014730/Ila0G002480/Ila17G020890/Ila11G008410/Ila06G003780/Ila13G003260/Ila02G004970	Ila0G015340/Ila06G008090/Ila06G014730/Ila0G002480/Ila17G020890/Ila11G008410/Ila06G003780/Ila13G003260/Ila02G004970	ath:ArthCp018/ath:AT5G66190/ath:AT5G64040/ath:ArthCp018/ath:AT4G12800/ath:AT1G03130/ath:AT3G50820/ath:AT2G30570/ath:AT1G52230	9	0		9	Ila0G015340/Ila06G008090/Ila06G014730/Ila0G002480/Ila17G020890/Ila11G008410/Ila06G003780/Ila13G003260/Ila02G004970
ath01230	Biosynthesis of amino acids	27/508	301/6076	0.37852	0.692885	Ila05G011930/Ila06G005560/Ila04G008170/Ila20G001070/Ila13G006710/Ila04G009790/Ila0G002680/Ila02G011640/Ila14G024750/Ila01G004650/Ila06G005540/Ila14G008360/Ila09G001490/Ila08G010450/Ila16G001380/Ila14G018490/Ila18G009170/Ila18G017060/Ila08G001890/Ila05G004340/Ila07G011040/Ila04G009770/Ila20G000200/Ila12G013650/Ila12G012530/Ila0G017900/Ila10G006780	Ila05G011930/Ila06G005560/Ila04G008170/Ila20G001070/Ila13G006710/Ila04G009790/Ila0G002680/Ila02G011640/Ila14G024750/Ila01G004650/Ila06G005540/Ila14G008360/Ila09G001490/Ila08G010450/Ila16G001380/Ila14G018490/Ila18G009170/Ila18G017060/Ila08G001890/Ila05G004340/Ila07G011040/Ila04G009770/Ila20G000200/Ila12G013650/Ila12G012530/Ila0G017900/Ila10G006780	ath:AT1G10070/ath:AT4G37930/ath:AT2G36530/ath:AT4G26530/ath:AT3G47340/ath:AT5G53460/ath:AT3G23940/ath:AT5G37600/ath:AT2G45290/ath:AT1G32440/ath:AT4G37930/ath:AT4G37930/ath:AT4G38970/ath:AT4G13430/ath:AT1G11790/ath:AT2G36580/ath:AT3G06350/ath:AT2G19940/ath:AT2G01140/ath:AT5G37600/ath:AT1G13440/ath:AT5G53460/ath:AT1G16300/ath:AT1G72330/ath:AT5G56760/ath:AT5G52920/ath:AT1G22170	27	8	Ila13G006710/Ila0G002680/Ila16G001380/Ila18G009170/Ila07G011040/Ila12G013650/Ila12G012530/Ila0G017900	19	Ila05G011930/Ila06G005560/Ila04G008170/Ila20G001070/Ila04G009790/Ila02G011640/Ila14G024750/Ila01G004650/Ila06G005540/Ila14G008360/Ila09G001490/Ila08G010450/Ila14G018490/Ila18G017060/Ila08G001890/Ila05G004340/Ila04G009770/Ila20G000200/Ila10G006780
ath00220	Arginine biosynthesis	4/508	38/6076	0.394072	0.709329	Ila02G011640/Ila18G017060/Ila05G004340/Ila12G013650	Ila02G011640/Ila18G017060/Ila05G004340/Ila12G013650	ath:AT5G37600/ath:AT2G19940/ath:AT5G37600/ath:AT1G72330	4	1	Ila12G013650	3	Ila02G011640/Ila18G017060/Ila05G004340
ath00565	Ether lipid metabolism	3/508	28/6076	0.418833	0.728642	Ila13G007560/Ila18G009800/Ila01G002290	Ila13G007560/Ila18G009800/Ila01G002290	ath:AT1G07230/ath:AT3G16785/ath:AT1G12640	3	1	Ila01G002290	2	Ila13G007560/Ila18G009800
ath00670	One carbon pool by folate	3/508	28/6076	0.418833	0.728642	Ila06G005560/Ila06G005540/Ila14G008360	Ila06G005560/Ila06G005540/Ila14G008360	ath:AT4G37930/ath:AT4G37930/ath:AT4G37930	3	0		3	Ila06G005560/Ila06G005540/Ila14G008360
ath00030	Pentose phosphate pathway	7/508	74/6076	0.425041	0.728642	Ila20G001070/Ila20G008050/Ila14G024750/Ila09G001490/Ila08G001890/Ila05G008900/Ila14G004420	Ila20G001070/Ila20G008050/Ila14G024750/Ila09G001490/Ila08G001890/Ila05G008900/Ila14G004420	ath:AT4G26530/ath:AT1G12000/ath:AT2G45290/ath:AT4G38970/ath:AT2G01140/ath:AT1G43670/ath:AT3G02360	7	1	Ila14G004420	6	Ila20G001070/Ila20G008050/Ila14G024750/Ila09G001490/Ila08G001890/Ila05G008900
ath00600	Sphingolipid metabolism	4/508	40/6076	0.432876	0.729571	Ila18G012630/novel.322/Ila04G007100/Ila16G011210	Ila18G012630/-/Ila04G007100/Ila16G011210	ath:AT1G33700/ath:AT5G08380/ath:AT3G56310/ath:AT5G08380	4	3	novel.322/Ila04G007100/Ila16G011210	1	Ila18G012630
ath00051	Fructose and mannose metabolism	7/508	75/6076	0.439094	0.729571	Ila20G001070/Ila20G008050/Ila09G001490/Ila18G007240/Ila08G001890/Ila05G008900/Ila06G007180	Ila20G001070/Ila20G008050/Ila09G001490/Ila18G007240/Ila08G001890/Ila05G008900/Ila06G007180	ath:AT4G26530/ath:AT1G12000/ath:AT4G38970/ath:AT5G57655/ath:AT2G01140/ath:AT1G43670/ath:AT5G66460	7	2	Ila18G007240/Ila06G007180	5	Ila20G001070/Ila20G008050/Ila09G001490/Ila08G001890/Ila05G008900
ath00410	beta-Alanine metabolism	5/508	53/6076	0.458658	0.750532	Ila11G008370/Ila05G004620/Ila03G001280/Ila02G008570/Ila09G013280	Ila11G008370/Ila05G004620/Ila03G001280/Ila02G008570/Ila09G013280	ath:AT4G14940/ath:AT1G23800/ath:AT3G51840/ath:AT2G42490/ath:AT5G13700	5	3	Ila11G008370/Ila03G001280/Ila02G008570	2	Ila05G004620/Ila09G013280
ath03420	Nucleotide excision repair	7/508	78/6076	0.480869	0.775132	Ila14G012430/Ila16G017220/Ila09G014910/Ila17G015440/Ila01G006220/novel.1159/novel.1807	Ila14G012430/Ila16G017220/Ila09G014910/Ila17G015440/Ila01G006220/-/-	ath:AT5G63960/ath:AT2G06510/ath:AT5G27740/ath:AT1G08260/ath:AT5G45400/ath:AT5G22010/ath:AT5G22010	7	3	Ila16G017220/novel.1159/novel.1807	4	Ila14G012430/Ila09G014910/Ila17G015440/Ila01G006220
ath03410	Base excision repair	4/508	45/6076	0.526201	0.828307	Ila14G012430/Ila13G001240/Ila17G015440/Ila12G006580	Ila14G012430/Ila13G001240/Ila17G015440/Ila12G006580	ath:AT5G63960/ath:AT4G02390/ath:AT1G08260/ath:AT3G47830	4	2	Ila13G001240/Ila12G006580	2	Ila14G012430/Ila17G015440
ath00310	Lysine degradation	3/508	33/6076	0.529196	0.828307	Ila05G004620/Ila01G012240/Ila06G000300	Ila05G004620/Ila01G012240/Ila06G000300	ath:AT1G23800/ath:AT2G24580/ath:AT5G13960	3	0		3	Ila05G004620/Ila01G012240/Ila06G000300
ath00950	Isoquinoline alkaloid biosynthesis	2/508	22/6076	0.559914	0.863867	Ila11G008370/Ila02G008570	Ila11G008370/Ila02G008570	ath:AT4G14940/ath:AT2G42490	2	2	Ila11G008370/Ila02G008570	0
ath03440	Homologous recombination	5/508	62/6076	0.600875	0.888085	Ila14G012430/Ila13G005690/Ila17G025500/Ila16G017220/Ila01G006220	Ila14G012430/Ila13G005690/Ila17G025500/Ila16G017220/Ila01G006220	ath:AT5G63960/ath:AT1G60930/ath:AT4G02110/ath:AT2G06510/ath:AT5G45400	5	2	Ila17G025500/Ila16G017220	3	Ila14G012430/Ila13G005690/Ila01G006220
ath00780	Biotin metabolism	2/508	24/6076	0.608142	0.888085	Ila16G024770/Ila02G002930	Ila16G024770/Ila02G002930	ath:AT1G74960/ath:AT1G74960	2	0		2	Ila16G024770/Ila02G002930
ath00770	Pantothenate and CoA biosynthesis	3/508	37/6076	0.608503	0.888085	Ila05G011930/Ila0G002680/Ila05G004620	Ila05G011930/Ila0G002680/Ila05G004620	ath:AT1G10070/ath:AT3G23940/ath:AT1G23800	3	1	Ila0G002680	2	Ila05G011930/Ila05G004620
ath00909	Sesquiterpenoid and triterpenoid biosynthesis	3/508	37/6076	0.608503	0.888085	Ila09G001560/Ila15G016200/Ila16G006170	Ila09G001560/Ila15G016200/Ila16G006170	ath:AT4G34640/ath:AT1G78955/ath:AT1G78960	3	1	Ila15G016200	2	Ila09G001560/Ila16G006170
ath00660	C5-Branched dibasic acid metabolism	1/508	11/6076	0.617583	0.88932	Ila08G010450	Ila08G010450	ath:AT4G13430	1	0		1	Ila08G010450
ath00940	Phenylpropanoid biosynthesis	12/508	152/6076	0.626826	0.890753	Ila10G007140/Ila19G000430/Ila16G020890/Ila16G020880/Ila16G012340/Ila05G015690/Ila05G002920/Ila14G007670/Ila06G004370/Ila16G020900/novel.1833/Ila14G020270	Ila10G007140/Ila19G000430/Ila16G020890/Ila16G020880/Ila16G012340/Ila05G015690/Ila05G002920/Ila14G007670/Ila06G004370/Ila16G020900/-/Ila14G020270	ath:AT1G71695/ath:AT5G05340/ath:AT5G48930/ath:AT5G48930/ath:AT5G48930/ath:AT4G39330/ath:AT5G63380/ath:AT4G37530/ath:AT4G34230/ath:AT5G48930/ath:AT5G05340/ath:AT2G39420	12	8	Ila10G007140/Ila19G000430/Ila16G020880/Ila16G012340/Ila05G015690/Ila05G002920/Ila14G007670/novel.1833	4	Ila16G020890/Ila06G004370/Ila16G020900/Ila14G020270
ath00531	Glycosaminoglycan degradation	1/508	12/6076	0.649614	0.911147	Ila16G019860	Ila16G019860	ath:AT5G34940	1	1	Ila16G019860	0
ath00960	Tropane, piperidine and pyridine alkaloid biosynthesis	3/508	41/6076	0.678396	0.939317	Ila11G008370/Ila02G008570/Ila03G002590	Ila11G008370/Ila02G008570/Ila03G002590	ath:AT4G14940/ath:AT2G42490/ath:AT2G29340	3	2	Ila11G008370/Ila02G008570	1	Ila03G002590
ath00591	Linoleic acid metabolism	1/508	14/6076	0.705865	0.962617	Ila17G011610	Ila17G011610	ath:AT3G45140	1	0		1	Ila17G011610
ath00230	Purine metabolism	8/508	111/6076	0.721149	0.962617	Ila08G012060/Ila04G011150/Ila09G018170/Ila19G011190/Ila18G018540/Ila11G007740/Ila06G004690/Ila01G009810	Ila08G012060/Ila04G011150/Ila09G018170/Ila19G011190/Ila18G018540/Ila11G007740/Ila06G004690/Ila01G009810	ath:AT3G22890/ath:AT1G54130/ath:AT3G27060/ath:AT3G57550/ath:AT2G16570/ath:AT3G22890/ath:AT2G14750/ath:AT5G11160	8	4	Ila09G018170/Ila19G011190/Ila06G004690/Ila01G009810	4	Ila08G012060/Ila04G011150/Ila18G018540/Ila11G007740
ath00511	Other glycan degradation	2/508	30/6076	0.728487	0.962617	Ila18G012630/Ila18G016050	Ila18G012630/Ila18G016050	ath:AT1G33700/ath:AT4G34260	2	1	Ila18G016050	1	Ila18G012630
ath04070	Phosphatidylinositol signaling system	5/508	72/6076	0.730876	0.962617	Ila03G006900/Ila05G011880/Ila05G006790/Ila13G007480/Ila08G012040	Ila03G006900/Ila05G011880/Ila05G006790/Ila13G007480/Ila08G012040	ath:AT3G09920/ath:AT4G08170/ath:AT1G21980/ath:AT3G08510/ath:AT3G43810	5	1	Ila08G012040	4	Ila03G006900/Ila05G011880/Ila05G006790/Ila13G007480
ath00340	Histidine metabolism	1/508	17/6076	0.773798	0.999999	Ila05G004620	Ila05G004620	ath:AT1G23800	1	0		1	Ila05G004620
ath01250	Biosynthesis of nucleotide sugars	8/508	119/6076	0.78955	0.999999	Ila17G007490/Ila10G002170/Ila08G009030/Ila12G008550/Ila05G007900/Ila01G002820/Ila09G016480/Ila09G001900	Ila17G007490/Ila10G002170/Ila08G009030/Ila12G008550/Ila05G007900/Ila01G002820/Ila09G016480/Ila09G001900	ath:AT5G48300/ath:AT4G39210/ath:AT3G23820/ath:AT3G02230/ath:AT5G52560/ath:AT1G02000/ath:AT4G00110/ath:AT4G39210	8	3	Ila08G009030/Ila01G002820/Ila09G016480	5	Ila17G007490/Ila10G002170/Ila12G008550/Ila05G007900/Ila09G001900
ath00562	Inositol phosphate metabolism	5/508	78/6076	0.792618	0.999999	Ila03G006900/Ila05G011880/Ila13G007560/Ila05G006790/Ila13G007480	Ila03G006900/Ila05G011880/Ila13G007560/Ila05G006790/Ila13G007480	ath:AT3G09920/ath:AT4G08170/ath:AT1G07230/ath:AT1G21980/ath:AT3G08510	5	0		5	Ila03G006900/Ila05G011880/Ila13G007560/Ila05G006790/Ila13G007480
ath00640	Propanoate metabolism	3/508	53/6076	0.831966	0.999999	Ila03G001280/Ila15G016520/novel.954	Ila03G001280/Ila15G016520/-	ath:AT3G51840/ath:AT5G36880/ath:AT5G36880	3	3	Ila03G001280/Ila15G016520/novel.954	0
ath03060	Protein export	4/508	69/6076	0.840406	0.999999	Ila0G000130/Ila14G027480/Ila04G010180/Ila15G005610	Ila0G000130/Ila14G027480/Ila04G010180/Ila15G005610	ath:AT4G24920/ath:AT5G42020/ath:AT5G42020/ath:AT5G62050	4	3	Ila0G000130/Ila14G027480/Ila04G010180	1	Ila15G005610
ath00360	Phenylalanine metabolism	2/508	39/6076	0.849534	0.999999	Ila11G008370/Ila02G008570	Ila11G008370/Ila02G008570	ath:AT4G14940/ath:AT2G42490	2	2	Ila11G008370/Ila02G008570	0
ath01240	Biosynthesis of cofactors	20/508	295/6076	0.869073	0.999999	Ila05G011930/Ila06G005560/Ila16G024770/Ila02G004160/Ila01G001720/Ila15G014830/Ila20G000460/Ila06G005540/Ila14G008360/Ila09G010220/Ila05G004620/Ila13G007490/Ila08G009030/Ila05G007660/Ila17G000820/Ila01G002820/Ila12G012520/Ila09G016480/Ila07G001430/Ila02G002930	Ila05G011930/Ila06G005560/Ila16G024770/Ila02G004160/Ila01G001720/Ila15G014830/Ila20G000460/Ila06G005540/Ila14G008360/Ila09G010220/Ila05G004620/Ila13G007490/Ila08G009030/Ila05G007660/Ila17G000820/Ila01G002820/Ila12G012520/Ila09G016480/Ila07G001430/Ila02G002930	ath:AT1G10070/ath:AT4G37930/ath:AT1G74960/ath:AT1G17710/ath:AT4G11570/ath:AT1G30520/ath:AT5G08280/ath:AT4G37930/ath:AT4G37930/ath:AT5G27380/ath:AT1G23800/ath:AT5G01410/ath:AT3G23820/ath:AT1G21640/ath:AT5G56090/ath:AT1G02000/ath:AT1G17710/ath:AT4G00110/ath:AT4G21470/ath:AT1G74960	20	6	Ila15G014830/Ila20G000460/Ila08G009030/Ila17G000820/Ila01G002820/Ila09G016480	14	Ila05G011930/Ila06G005560/Ila16G024770/Ila02G004160/Ila01G001720/Ila06G005540/Ila14G008360/Ila09G010220/Ila05G004620/Ila13G007490/Ila05G007660/Ila12G012520/Ila07G001430/Ila02G002930
ath01232	Nucleotide metabolism	6/508	105/6076	0.883146	0.999999	Ila09G018170/Ila19G011190/Ila01G009810/Ila12G008430/Ila14G001130/Ila0G019410	Ila09G018170/Ila19G011190/Ila01G009810/Ila12G008430/Ila14G001130/Ila0G019410	ath:AT3G27060/ath:AT3G57550/ath:AT5G11160/ath:AT3G48540/ath:AT3G27440/ath:AT1G26190	6	5	Ila09G018170/Ila19G011190/Ila01G009810/Ila14G001130/Ila0G019410	1	Ila12G008430
ath00760	Nicotinate and nicotinamide metabolism	1/508	26/6076	0.8972	0.999999	Ila05G007660	Ila05G007660	ath:AT1G21640	1	0		1	Ila05G007660
ath00240	Pyrimidine metabolism	4/508	86/6076	0.937161	0.999999	Ila09G018170/Ila12G008430/Ila14G001130/Ila0G019410	Ila09G018170/Ila12G008430/Ila14G001130/Ila0G019410	ath:AT3G27060/ath:AT3G48540/ath:AT3G27440/ath:AT1G26190	4	3	Ila09G018170/Ila14G001130/Ila0G019410	1	Ila12G008430
ath00040	Pentose and glucuronate interconversions	3/508	70/6076	0.940092	0.999999	Ila18G007240/Ila05G007900/Ila07G009480	Ila18G007240/Ila05G007900/Ila07G009480	ath:AT5G57655/ath:AT5G52560/ath:AT3G01270	3	2	Ila18G007240/Ila07G009480	1	Ila05G007900
ath04130	SNARE interactions in vesicular transport	2/508	56/6076	0.954705	0.999999	Ila04G008910/Ila19G008930	Ila04G008910/Ila19G008930	ath:AT5G52270/ath:AT1G61290	2	2	Ila04G008910/Ila19G008930	0
ath00130	Ubiquinone and other terpenoid-quinone biosynthesis	2/508	58/6076	0.96088	0.999999	Ila15G014830/Ila05G002920	Ila15G014830/Ila05G002920	ath:AT1G30520/ath:AT5G63380	2	2	Ila15G014830/Ila05G002920	0
ath04120	Ubiquitin mediated proteolysis	9/508	174/6076	0.961355	0.999999	Ila19G006040/Ila15G020350/Ila0G014120/novel.2407/Ila06G008290/Ila01G001160/Ila02G007950/Ila06G008340/Ila0G008580	Ila19G006040/Ila15G020350/Ila0G014120/-/Ila06G008290/Ila01G001160/Ila02G007950/Ila06G008340/Ila0G008580	ath:AT5G22920/ath:AT2G33770/ath:AT5G65740/ath:AT5G20620/ath:AT1G64230/ath:AT5G41580/ath:AT5G41340/ath:AT1G75950/ath:AT5G22920	9	6	Ila19G006040/Ila0G014120/novel.2407/Ila01G001160/Ila02G007950/Ila0G008580	3	Ila15G020350/Ila06G008290/Ila06G008340
ath00400	Phenylalanine, tyrosine and tryptophan biosynthesis	2/508	59/6076	0.963656	0.999999	Ila16G001380/Ila18G009170	Ila16G001380/Ila18G009170	ath:AT1G11790/ath:AT3G06350	2	2	Ila16G001380/Ila18G009170	0
ath03250	Viral life cycle - HIV-1	1/508	42/6076	0.974778	0.999999	Ila13G003090	Ila13G003090	ath:AT2G38830	1	1	Ila13G003090	0
ath04144	Endocytosis	9/508	186/6076	0.978146	0.999999	Ila03G006900/Ila18G009800/Ila12G009150/Ila05G006790/Ila11G005430/Ila12G008960/Ila14G006970/Ila15G019770/Ila13G003090	Ila03G006900/Ila18G009800/Ila12G009150/Ila05G006790/Ila11G005430/Ila12G008960/Ila14G006970/Ila15G019770/Ila13G003090	ath:AT3G09920/ath:AT3G16785/ath:AT5G13300/ath:AT1G21980/ath:AT2G33385/ath:AT5G13300/ath:AT1G10630/ath:AT5G60860/ath:AT2G38830	9	3	Ila11G005430/Ila15G019770/Ila13G003090	6	Ila03G006900/Ila18G009800/Ila12G009150/Ila05G006790/Ila12G008960/Ila14G006970
ath00100	Steroid biosynthesis	1/508	46/6076	0.98226	0.999999	Ila09G001560	Ila09G001560	ath:AT4G34640	1	0		1	Ila09G001560
ath00900	Terpenoid backbone biosynthesis	2/508	72/6076	0.986293	0.999999	Ila07G007220/Ila14G010600	Ila07G007220/Ila14G010600	ath:AT1G26120/ath:AT1G76490	2	1	Ila07G007220	1	Ila14G010600
ath00190	Oxidative phosphorylation	8/508	202/6076	0.996043	0.999999	Ila15G010620/Ila16G000310/Ila0G014900/Ila17G000820/Ila19G003500/Ila16G021340/Ila01G007010/Ila0G011460	Ila15G010620/Ila16G000310/Ila0G014900/Ila17G000820/Ila19G003500/Ila16G021340/Ila01G007010/Ila0G011460	ath:AT2G24520/ath:AT5G47630/ath:ArthCp080/ath:AT5G56090/ath:AT3G53620/ath:AT5G57815/ath:AT4G29480/ath:AT4G10040	8	6	Ila16G000310/Ila0G014900/Ila17G000820/Ila16G021340/Ila01G007010/Ila0G011460	2	Ila15G010620/Ila19G003500
ath00020	Citrate cycle (TCA cycle)	1/508	64/6076	0.996369	0.999999	Ila14G020650	Ila14G020650	ath:AT3G55410	1	0		1	Ila14G020650
ath03010	Ribosome	19/508	398/6076	0.998465	0.999999	novel.2553/Ila07G006500/Ila08G004370/Ila15G009440/Ila02G005220/Ila17G014000/Ila0G015280/novel.69/Ila0G015080/Ila0G015020/Ila11G010380/Ila20G009320/Ila16G012820/Ila08G006480/Ila12G011870/Ila15G003990/Ila19G010030/Ila17G023780/Ila14G017390	-/Ila07G006500/Ila08G004370/Ila15G009440/Ila02G005220/Ila17G014000/Ila0G015280/-/Ila0G015080/Ila0G015020/Ila11G010380/Ila20G009320/Ila16G012820/Ila08G006480/Ila12G011870/Ila15G003990/Ila19G010030/Ila17G023780/Ila14G017390	ath:AT5G47320/ath:AT3G25920/ath:AT1G26880/ath:AT4G31985/ath:AT3G16080/ath:AT1G77940/ath:ArthCp024/ath:AT4G31985/ath:ArthCp056/ath:ArthCp064/ath:AT3G06700/ath:AT2G18020/ath:AT4G31985/ath:AT2G43460/ath:AT1G79850/ath:AT2G36620/ath:AT5G64140/ath:AT3G04920/ath:AT5G04800	19	19	novel.2553/Ila07G006500/Ila08G004370/Ila15G009440/Ila02G005220/Ila17G014000/Ila0G015280/novel.69/Ila0G015080/Ila0G015020/Ila11G010380/Ila20G009320/Ila16G012820/Ila08G006480/Ila12G011870/Ila15G003990/Ila19G010030/Ila17G023780/Ila14G017390	0
ath04145	Phagosome	2/508	101/6076	0.998577	0.999999	Ila0G000130/Ila04G008910	Ila0G000130/Ila04G008910	ath:AT4G24920/ath:AT5G52270	2	2	Ila0G000130/Ila04G008910	0
ath03018	RNA degradation	4/508	155/6076	0.999315	0.999999	Ila04G008170/Ila0G017220/Ila0G009240/Ila12G007040	Ila04G008170/Ila0G017220/Ila0G009240/Ila12G007040	ath:AT2G36530/ath:AT3G23990/ath:AT2G36660/ath:AT4G32175	4	3	Ila0G017220/Ila0G009240/Ila12G007040	1	Ila04G008170
ath03015	mRNA surveillance pathway	2/508	159/6076	0.999988	0.999999	Ila0G009240/Ila09G006280	Ila0G009240/Ila09G006280	ath:AT2G36660/ath:AT1G11400	2	2	Ila0G009240/Ila09G006280	0
ath03013	Nucleocytoplasmic transport	1/508	158/6076	0.999999	0.999999	Ila09G006280	Ila09G006280	ath:AT1G11400	1	1	Ila09G006280	0
