# Supplementary material for: Molecular Mechanisms of Chlorophyll Deficiency in Ilex × attenuata ‘Sunny Foster’ Mutant
Source: Plants (Basel). 2024 May 7;13(10):1284. doi: 10.3390/plants13101284 (PMC11124982; doi:10.3390/plants13101284)
Supplement: Supplementary file 1 [file plants-13-01284-s001.zip › Table S5 DEGs discussed in the paper..xls]

## Sheet: Sheet1
Gene ID	Gene name	Description	WT-1_FPKM	WT-2_FPKM	WT-3_FPKM	YT-1_FPKM	YT-2_FPKM	YT-3_FPKM	log2FC	Padj	regulated
Chloroplast development
GLK
Ila20G011400	GLK1	Transcription activator GLK1	66.4587	64.7456	48.2749	13.2819	12.3226	15.1893	-2.13761	4.26e-30	down
Ila17G003740	GLK2	Transcription activator GLK2	59.5154	58.0253	44.0369	20.1843	19.0245	23.7307	-1.36027	7.87e-12	down
Chlorophyll metabolism
Ila17G009680	PORA	Protochlorophyllide reductase	145.227	107.761	105.48	866.716	574.471	706.569	2.583	1.81e-36	up
Ila17G000450	HEMC	Porphobilinogen deaminase	26.0781	20.4735	18.7024	80.6051	80.7902	92.6564	1.96174	5.03e-28	up
Ila20G000460	HEMC	Porphobilinogen deaminase	63.9708	62.4208	46.8485	218.315	195.26	267.845	1.97609	1.04e-24	up
Ila09G012370	CHLD	Magnesium-chelatase subunit ChlD	47.728	47.661	35.3914	122.841	131.802	153.06	1.64064	1.93e-20	up
Ila10G009360	HEMB1	Delta-aminolevulinic acid dehydratase 1	53.6874	44.0402	42.7545	116.946	107.857	131.828	1.34419	9.12e-17	up
Ila02G001080	CHLM	Magnesium protoporphyrin IX methyltransferase	108.795	103.315	85.3973	271.979	242.092	346.714	1.53283	4.42e-16	up
Ila02G000680	GSA	Glutamate-1-semialdehyde 2,1-aminomutase	132.361	130.319	106.057	275.706	268.474	313.232	1.2175	7.57e-16	up
Ila15G019570	CHLI	Magnesium-chelatase subunit ChlI	169.765	175.025	130.363	394.164	385.273	480.923	1.40746	1.15e-15	up
Ila04G007000	HEME	Uroporphyrinogen decarboxylase	79.7275	82.2424	65.539	200.806	184.87	263.023	1.51173	1.15e-15	up
Ila20G004240	PORA	Protochlorophyllide reductase	1.037	0.964901	0.449801	7.64564	6.2837	6.53139	3.06987	1.06e-14	up
Ila12G008730	GSA	Glutamate-1-semialdehyde 2,1-aminomutase	3.34758	1.74184	2.32768	10.7584	10.8586	10.443	2.11334	1.26e-12	up
Ila20G005240	HEME1	Uroporphyrinogen decarboxylase 1	32.3398	30.9999	23.615	60.0954	62.0446	74.0018	1.17406	6.01e-10	up
Ila20G003850	PORA	Protochlorophyllide reductase	0.486408	0.240438	0.39229	3.9862	2.78363	3.54565	3.20305	4.38e-09	up
Ila05G007280	HEMB1	Delta-aminolevulinic acid dehydratase 1	43.8492	33.6995	29.2063	74.6271	76.7433	88.7861	1.17007	4.43e-09	up
Ila11G009290	DVR	Divinyl chlorophyllide a 8-vinyl-reductase	71.6519	64.0761	42.9468	134.13	110.983	177.004	1.24046	1.73e-06	up
Ila05G008020	SGR	Magnesium dechelatase	7.725	11.4557	7.71365	22.5922	27.3189	18.8319	1.35571	7.28e-06	up
Ila05G008140	SGR	Magnesium dechelatase	4.02368	4.20741	4.42192	10.2207	8.17522	11.6878	1.24768	2.45e-05	up
Ila09G014230	HEMD	S-adenosyl-L-methionine-dependent uroporphyrinogen III methyltransferase	55.9867	52.4323	35.7498	16.8278	18.856	21.8445	-1.32494	2.96e-08	down
Carotenoids metabolism
Ila10G003260	CYP707A1	Abscisic acid 8'-hydroxylase	26.9955	23.2205	14.995	9.16596	7.8331	8.40813	-1.35964	3.94e-07	down
Ila16G006300	NCED2	9-cis-epoxycarotenoid dioxygenase NCED2	1.13751	3.4112	2.79591	0.438687	0.534137	0.217491	-2.62126	1.74e-05	down
Ila20G005950	NCED1	9-cis-epoxycarotenoid dioxygenase NCED1	2.7367	3.69634	4.72519	1.37502	2.07012	0.884374	-1.36307	0.00223451	down
Ila17G014890	CCS	Capsanthin/capsorubin synthase	1.91751	1.66592	1.76741	0.616247	0.613907	0.499945	-1.62766	0.00425867	down
Ila16G024340	LCYE	Lycopene epsilon cyclase	26.9868	22.4886	17.1431	96.1209	83.4416	99.6672	2.06806	8.04e-26	up
Ila13G008940	CYP707A2	Abscisic acid 8'-hydroxylase 2	3.18674	3.48212	1.39134	7.70809	15.1607	15.7136	2.26249	8.18e-08	up
Flavonoid biosynthesis
Ila12G013340	CYP92C6	Trimethyltridecatetraene synthase	37.204	26.9961	46.9231	6.75312	7.99903	7.81211	-2.29993	2.11e-21	down
Ila14G006580	CAMT	Caffeoyl-CoA O-methyltransferase	55.2642	56.0877	78.0149	19.472	13.0128	13.3397	-2.04833	3.6e-17	down
Ila18G016510	CAMT	Caffeoyl-CoA O-methyltransferase	419.389	505.409	607.862	171.535	140.119	187.071	-1.61998	6.32e-17	down
Ila09G011730	CYP98A2	Cytochrome P450 98A2	77.893	89.905	120.86	36.621	33.3448	29.3125	-1.54002	1.63e-13	down
Ila02G002060	HCT	Shikimate O-hydroxycinnamoyltransferase	55.1622	49.9902	60.1126	23.0603	13.7227	18.6083	-1.57842	2.66e-12	down
Ila16G002080	ANR	Anthocyanidin reductase ((2S)-flavan-3-ol-forming)	9.38524	13.0656	17.4777	3.324	1.51771	1.55641	-2.64707	7.28e-10	down
Ila14G023290	CHI	Chalcone isomerase-like protein 2	120.254	139.064	178.336	72.4632	51.3595	42.5834	-1.39553	5.53e-08	down
Ila09G003090	CAMT	Caffeoyl-CoA O-methyltransferase	938.101	947.223	1135.51	619.621	381.103	497.609	-1.01169	2.29e-06	down
Ila02G002080	HCT	Shikimate O-hydroxycinnamoyltransferase	13.2378	18.7556	23.626	8.37323	5.34499	6.20674	-1.48348	4.68e-06	down
Ila16G024470	CYP92C6	Trimethyltridecatetraene synthase	4.67509	4.31379	15.5129	2.80463	4.482	2.13537	-1.37848	0.0220352	down
Photosynthesis - antenna protein
Ila15G017050	LHCB	Photosystem II chlorophyll a/b-binding protein	123.977	150.318	112.243	235.348	227.94	336.097	1.04831	1.25e-06	up
Ila20G007430	LHCB	Photosystem II chlorophyll a/b-binding protein	1489.08	1525.1	1035.08	3007.3	2338.7	3270.73	1.08949	4.2e-07	up
Ila16G017490	LHCA	Photosystem I chlorophyll a/b-binding protein	81.3908	84.0046	54.6697	154.413	175.471	191.899	1.24606	5.19e-09	up
Ila16G005230	LHCB	Photosystem II chlorophyll a/b-binding protein	55.4756	52.4045	31.7415	113.545	77.4034	168.879	1.36603	5.12e-05	up
Ila16G005240	LHCB	Photosystem II chlorophyll a/b-binding protein	0	0.141472	0	0.0689839	2.14183	0.273605	4.15433	0.0437897	up
Ila17G006720	LHCA	Photosystem I chlorophyll a/b-binding protein	0.15136	0	0.139511	2.62677	0.399788	3.03869	4.37015	0.0083813	up
Ila14G019570	LHCA	Photosystem I chlorophyll a/b-binding protein	0	0.0970754	0	1.23072	1.72904	1.87743	5.56363	0.000418052	up
Photosynthesis
Photosystem II
Ila0G015340	psbC	Photosystem II CP43 reaction center protein	116.849	101.153	83.1447	26.6341	32.7365	34.2318	-1.68545	9.02e-19	down
Ila0G002480	psbC	Photosystem II CP43 reaction center protein	4.11606	3.00498	2.74325	1.16001	1.0593	1.51344	-1.40275	0.00232603	down
Ila16G002030	PsbQ	Oxygen-evolving enhancer protein 3	96.3209	104.464	85.5787	160.149	193.025	253.857	1.084	2.39e-07	up
Ila0G015420	psbK	Photosystem II reaction center protein K	2.31671	2.62828	1.50525	4.50388	6.05228	8.06031	1.53147	1.95e-05	up
Ila0G015180	psbE	Cytochrome b559 subunit alpha	0.338742	0.133956	0.12489	1.11042	0.894723	0.777206	2.2276	0.0261679	up
Photosystem I
Ila0G015310	psaB	Photosystem I P700 chlorophyll a apoprotein A2	3.71501	3.83969	2.45141	6.14601	6.87618	7.91023	1.06715	0.000308299	up
Ila0G015300	psaA	Photosystem I P700 chlorophyll a apoprotein A1	1.86736	1.95062	1.55881	3.87255	4.74616	4.74928	1.31616	5.06e-06	up
Cytochrome b6/f complex
Ila0G015100	petD	Cytochrome b6-f complex subunit 4	2.84776	2.46345	2.37876	22.3083	14.7302	14.7183	2.75133	3.94e-18	up
Photosynthethic electron transport
Ila17G015180	petF	FDX3 Ferredoxin-3	27.1871	24.9302	25.7852	8.54743	9.97355	11.3945	-1.38053	1.47e-10	down
Ila0G006980	petH	Ferredoxin--NADP reductase	39.8863	33.7994	26.6135	13.6814	15.2915	16.6038	-1.13739	1.46e-07	down
Ila15G014850	petH	Ferredoxin--NADP reductase	83.8615	86.2239	69.6187	32.1799	38.6402	45.9114	-1.03789	8.32e-08	down
Ila15G001190	petF	Ferredoxin C 2	27.9467	22.6987	22.2159	57.4948	58.5404	80.3493	1.43077	3.85e-11	up
F-type ATPase
Ila0G015230	atpB	ATP synthase subunit beta	10.7575	17.6432	10.3166	22.6019	26.2239	30.1984	1.02994	0.000262643	up
Ila0G015240	atpE	ATP synthase epsilon chain	21.927	34.3569	19.4479	42.2813	56.459	70.7966	1.16416	0.001773	up
Ila0G015410	atpA	ATP synthase subunit alpha	2.29654	2.27041	1.88157	4.52676	5.75134	5.80583	1.32089	2.82e-05	up
Ila0G015380	atpI	ATP synthase subunit a	1.60707	1.95543	1.02549	6.67449	6.53041	5.90904	2.06447	1.56e-05	up
Carbon fixation in photosynthetic organisms
Ila12G005450	At3g47520	Malate dehydrogenase, chloroplastic	27.9153	47.8397	39.3491	11.7018	7.99123	8.97973	-2.00613	8.6e-15	down
Ila05G011720	PCK1	Phosphoenolpyruvate carboxykinase (ATP) 1	106.904	98.1602	111.683	28.9013	40.9129	29.9001	-1.66701	1.09e-20	down
Ila16G010640	RBCS	Ribulose bisphosphate carboxylase small subunit, chloroplastic	1.75221	2.52624	3.90304	0.703906	0.642797	1.32613	-1.61981	0.011129	down
Ila20G005200	PCK1	Phosphoenolpyruvate carboxylase	65.0519	87.8614	84.404	37.247	32.0806	21.2042	-1.39032	9.08e-09	down
Ila07G005830	FBA3	Fructose-bisphosphate aldolase 3, chloroplastic	76.5205	88.4568	120.687	39.7436	43.8826	31.7657	-1.30774	8.06e-09	down
Ila07G011040	GAPC2	Glyceraldehyde-3-phosphate dehydrogenase GAPC2, cytosolic	144.624	204.038	248.138	147.244	86.848	57.1232	-1.03525	0.00490105	down
Ila16G008020	RPI4	Probable ribose-5-phosphate isomerase 4, chloroplastic	8.97027	9.2572	5.87469	14.035	18.8438	20.8371	1.15823	9.69e-05	up
Ila12G013650	AGXT2	Alanine aminotransferase 2, mitochondrial	9.08908	8.85547	8.25618	38.3122	21.6103	31.8601	1.8084	1.36e-13	up
Ila14G019270	TKL1	Transketolase-1, chloroplastic	0.769643	0.680795	0.298693	3.31966	1.64056	3.098	2.20865	4.21e-05	up
Nitrogen metabolism
Ila07G010520	NRT2.5	High affinity nitrate transporter 2.5	0.191339	0.331034	0.396812	0	0	0	-5.2241	0.00855165	down
Ila05G004070	NRT2.5	High affinity nitrate transporter 2.5	4.25814	6.98066	2.08661	1.29919	0.901665	1.49433	-1.85156	0.000777521	down
Ila0G011760	GLNA1	Glutamine synthetase cytosolic isozyme	15.4281	7.77985	15.1748	2.19628	6.29033	4.45446	-1.56545	0.00125292	down
Ila03G009960	GDH1	Glutamate dehydrogenase 1	29.8522	34.5996	33.2772	10.3729	14.2647	10.082	-1.49181	3.73e-14	down
Ila14G001440	NRT2.7	High affinity nitrate transporter 2.7	3.03842	1.41091	2.12165	1.15403	0.526922	0.792197	-1.41397	0.0138411	down
Ila05G006740	NIA	Nitrate reductase [NADH]	197.934	214.968	182.989	46.3859	105.677	83.7431	-1.33732	3.21e-06	down
Ila17G016330	NRT2.1	High-affinity nitrate transporter 2.1	29.3341	24.3789	19.282	7.38041	11.4729	10.614	-1.30721	8.16e-07	down
Ila05G004290	CAHC	Carbonic anhydrase, chloroplastic	121.75	121.337	112.932	61.6383	55.0501	53.0583	-1.06862	1.32e-15	down
Ila02G008130	CAHC	Carbonic anhydrase, chloroplastic	18.2738	17.4598	8.81734	8.27716	5.8309	7.97277	-1.01272	0.0139825	down
