# Supplementary material for: Molecular Mechanisms of Chlorophyll Deficiency in Ilex × attenuata ‘Sunny Foster’ Mutant
Source: Plants (Basel). 2024 May 7;13(10):1284. doi: 10.3390/plants13101284 (PMC11124982; doi:10.3390/plants13101284)
Supplement: Supplementary file 1 [file plants-13-01284-s001.zip › Table S6 GSEA enrichment pathway in YT..xls]

## Sheet: gsea_report_for_YT_168656813470
NAME	GS<br> follow link to MSigDB	GS DETAILS	SIZE	ES	NES	NOM p-val	FDR q-val	FWER p-val	RANK AT MAX	LEADING EDGE
RNA_POLYMERASE(ATH03020)	RNA_POLYMERASE(ATH03020)	Details ...	49	0.46542	1.6595	0	0.335517	0.24	6632	tags=43%, list=25%, signal=57%
RIBOSOME(ATH03010)	RIBOSOME(ATH03010)	Details ...	386	0.524414	1.59129	0	0.306765	0.495	7603	tags=49%, list=29%, signal=68%
HOMOLOGOUS_RECOMBINATION(ATH03440)	HOMOLOGOUS_RECOMBINATION(ATH03440)	Details ...	57	0.600469	1.5817	0	0.245177	0.495	5033	tags=39%, list=19%, signal=48%
PORPHYRIN_METABOLISM(ATH00860)	PORPHYRIN_METABOLISM(ATH00860)	Details ...	65	0.63443	1.57714	0	0.23731	0.551	3739	tags=48%, list=14%, signal=55%
PANTOTHENATE_AND_COA_BIOSYNTHESIS(ATH00770)	PANTOTHENATE_AND_COA_BIOSYNTHESIS(ATH00770)	Details ...	37	0.497067	1.51417	0	0.397839	0.758	4056	tags=35%, list=15%, signal=41%
PROPANOATE_METABOLISM(ATH00640)	PROPANOATE_METABOLISM(ATH00640)	Details ...	48	0.443871	1.48304	0	0.397779	0.808	5766	tags=33%, list=22%, signal=43%
RNA_DEGRADATION(ATH03018)	RNA_DEGRADATION(ATH03018)	Details ...	146	0.413211	1.45639	0	0.425543	0.901	6368	tags=38%, list=24%, signal=49%
UBIQUINONE_AND_OTHER_TERPENOID_QUINONE_BIOSYNTHESIS(ATH00130)	UBIQUINONE_AND_OTHER_TERPENOID_QUINONE_BIOSYNTHESIS(ATH00130)	Details ...	55	0.450512	1.43721	0	0.42029	0.901	3028	tags=36%, list=12%, signal=41%
VALINE__LEUCINE_AND_ISOLEUCINE_DEGRADATION(ATH00280)	VALINE__LEUCINE_AND_ISOLEUCINE_DEGRADATION(ATH00280)	Details ...	68	0.389151	1.43066	0	0.397	0.901	6402	tags=37%, list=24%, signal=48%
PROTEIN_EXPORT(ATH03060)	PROTEIN_EXPORT(ATH03060)	Details ...	64	0.368033	1.42572	0	0.3633	0.901	3981	tags=27%, list=15%, signal=31%
2_OXOCARBOXYLIC_ACID_METABOLISM(ATH01210)	2_OXOCARBOXYLIC_ACID_METABOLISM(ATH01210)	Details ...	65	0.43296	1.41703	0	0.339753	0.901	4668	tags=35%, list=18%, signal=43%
LYSINE_DEGRADATION(ATH00310)	LYSINE_DEGRADATION(ATH00310)	Details ...	35	0.371484	1.4143	0	0.321429	0.901	5310	tags=31%, list=20%, signal=39%
VALINE__LEUCINE_AND_ISOLEUCINE_BIOSYNTHESIS(ATH00290)	VALINE__LEUCINE_AND_ISOLEUCINE_BIOSYNTHESIS(ATH00290)	Details ...	23	0.584605	1.41176	0	0.305923	0.901	3237	tags=39%, list=12%, signal=45%
PROTEIN_PROCESSING_IN_ENDOPLASMIC_RETICULUM(ATH04141)	PROTEIN_PROCESSING_IN_ENDOPLASMIC_RETICULUM(ATH04141)	Details ...	257	0.358196	1.4082	0.109228	0.302254	0.901	5263	tags=26%, list=20%, signal=33%
AMINOACYL_TRNA_BIOSYNTHESIS(ATH00970)	AMINOACYL_TRNA_BIOSYNTHESIS(ATH00970)	Details ...	71	0.603064	1.38465	0	0.333939	0.942	5562	tags=52%, list=21%, signal=66%
ISOQUINOLINE_ALKALOID_BIOSYNTHESIS(ATH00950)	ISOQUINOLINE_ALKALOID_BIOSYNTHESIS(ATH00950)	Details ...	22	0.522319	1.3673	0	0.340377	0.942	3992	tags=50%, list=15%, signal=59%
HISTIDINE_METABOLISM(ATH00340)	HISTIDINE_METABOLISM(ATH00340)	Details ...	18	0.447844	1.35415	0	0.350133	1	6371	tags=44%, list=24%, signal=59%
SPLICEOSOME(ATH03040)	SPLICEOSOME(ATH03040)	Details ...	229	0.300565	1.32603	0.0878906	0.38726	1	10380	tags=52%, list=40%, signal=84%
PHENYLALANINE_METABOLISM(ATH00360)	PHENYLALANINE_METABOLISM(ATH00360)	Details ...	40	0.404177	1.31445	0	0.395712	1	4067	tags=43%, list=15%, signal=50%
LYSINE_BIOSYNTHESIS(ATH00300)	LYSINE_BIOSYNTHESIS(ATH00300)	Details ...	16	0.423557	1.29338	0.19802	0.431424	1	7145	tags=56%, list=27%, signal=77%
MRNA_SURVEILLANCE_PATHWAY(ATH03015)	MRNA_SURVEILLANCE_PATHWAY(ATH03015)	Details ...	156	0.22965	1.29165	0.0800781	0.416361	1	9920	tags=43%, list=38%, signal=69%
BIOSYNTHESIS_OF_COFACTORS(ATH01240)	BIOSYNTHESIS_OF_COFACTORS(ATH01240)	Details ...	298	0.266877	1.26638	0.113131	0.45328	1	6070	tags=31%, list=23%, signal=40%
STARCH_AND_SUCROSE_METABOLISM(ATH00500)	STARCH_AND_SUCROSE_METABOLISM(ATH00500)	Details ...	186	0.266602	1.24541	0	0.483995	1	4602	tags=26%, list=18%, signal=31%
NICOTINATE_AND_NICOTINAMIDE_METABOLISM(ATH00760)	NICOTINATE_AND_NICOTINAMIDE_METABOLISM(ATH00760)	Details ...	25	0.433672	1.24089	0.0985916	0.475596	1	6720	tags=40%, list=26%, signal=54%
CYANOAMINO_ACID_METABOLISM(ATH00460)	CYANOAMINO_ACID_METABOLISM(ATH00460)	Details ...	81	0.302178	1.23482	0	0.466204	1	2175	tags=19%, list=8%, signal=20%
MISMATCH_REPAIR(ATH03430)	MISMATCH_REPAIR(ATH03430)	Details ...	41	0.516092	1.21595	0.0989899	0.500172	1	7698	tags=54%, list=29%, signal=76%
PEROXISOME(ATH04146)	PEROXISOME(ATH04146)	Details ...	108	0.287204	1.19579	0.199241	0.539116	1	7527	tags=40%, list=29%, signal=56%
PHOTOSYNTHESIS___ANTENNA_PROTEINS(ATH00196)	PHOTOSYNTHESIS___ANTENNA_PROTEINS(ATH00196)	Details ...	27	0.580079	1.18957	0.498986	0.535459	1	5384	tags=48%, list=20%, signal=61%
BASE_EXCISION_REPAIR(ATH03410)	BASE_EXCISION_REPAIR(ATH03410)	Details ...	59	0.374052	1.18626	0.292969	0.527542	1	6653	tags=39%, list=25%, signal=52%
BUTANOATE_METABOLISM(ATH00650)	BUTANOATE_METABOLISM(ATH00650)	Details ...	24	0.350081	1.17913	0.207865	0.528449	1	6121	tags=46%, list=23%, signal=60%
ARGININE_AND_PROLINE_METABOLISM(ATH00330)	ARGININE_AND_PROLINE_METABOLISM(ATH00330)	Details ...	57	0.27714	1.17423	0.0933333	0.521704	1	4722	tags=32%, list=18%, signal=38%
RIBOSOME_BIOGENESIS_IN_EUKARYOTES(ATH03008)	RIBOSOME_BIOGENESIS_IN_EUKARYOTES(ATH03008)	Details ...	89	0.322398	1.1658	0.200795	0.524798	1	8370	tags=48%, list=32%, signal=71%
PHOTOSYNTHESIS(ATH00195)	PHOTOSYNTHESIS(ATH00195)	Details ...	89	0.473707	1.14795	0.485207	0.553806	1	5026	tags=46%, list=19%, signal=57%
OXIDATIVE_PHOSPHORYLATION(ATH00190)	OXIDATIVE_PHOSPHORYLATION(ATH00190)	Details ...	187	0.255267	1.12661	0.201536	0.587404	1	6180	tags=28%, list=24%, signal=36%
BETA_ALANINE_METABOLISM(ATH00410)	BETA_ALANINE_METABOLISM(ATH00410)	Details ...	52	0.280755	1.12393	0.330078	0.57777	1	4635	tags=23%, list=18%, signal=28%
PHENYLALANINE__TYROSINE_AND_TRYPTOPHAN_BIOSYNTHESIS(ATH00400)	PHENYLALANINE__TYROSINE_AND_TRYPTOPHAN_BIOSYNTHESIS(ATH00400)	Details ...	54	0.275935	1.12031	0.208255	0.571392	1	6124	tags=37%, list=23%, signal=48%
BASAL_TRANSCRIPTION_FACTORS(ATH03022)	BASAL_TRANSCRIPTION_FACTORS(ATH03022)	Details ...	63	0.234817	1.09851	0.210084	0.614544	1	7356	tags=25%, list=28%, signal=35%
TERPENOID_BACKBONE_BIOSYNTHESIS(ATH00900)	TERPENOID_BACKBONE_BIOSYNTHESIS(ATH00900)	Details ...	67	0.256571	1.09367	0.370441	0.605926	1	5055	tags=25%, list=19%, signal=31%
FOLATE_BIOSYNTHESIS(ATH00790)	FOLATE_BIOSYNTHESIS(ATH00790)	Details ...	28	0.366433	1.07864	0.371648	0.617977	1	5964	tags=46%, list=23%, signal=60%
ARGININE_BIOSYNTHESIS(ATH00220)	ARGININE_BIOSYNTHESIS(ATH00220)	Details ...	38	0.327635	1.06103	0.400398	0.630165	1	6019	tags=39%, list=23%, signal=51%
PROTEASOME(ATH03050)	PROTEASOME(ATH03050)	Details ...	73	0.366573	1.04763	0.204589	0.635146	1	9967	tags=48%, list=38%, signal=77%
PYRIMIDINE_METABOLISM(ATH00240)	PYRIMIDINE_METABOLISM(ATH00240)	Details ...	83	0.249753	1.04078	0.287938	0.641701	1	6794	tags=33%, list=26%, signal=44%
TYROSINE_METABOLISM(ATH00350)	TYROSINE_METABOLISM(ATH00350)	Details ...	47	0.311142	1.03268	0.316206	0.642633	1	3992	tags=28%, list=15%, signal=33%
THIAMINE_METABOLISM(ATH00730)	THIAMINE_METABOLISM(ATH00730)	Details ...	34	0.275083	1.03254	0.396116	0.629391	1	8482	tags=47%, list=32%, signal=69%
NUCLEOTIDE_EXCISION_REPAIR(ATH03420)	NUCLEOTIDE_EXCISION_REPAIR(ATH03420)	Details ...	89	0.263352	1.03131	0.397706	0.616738	1	9148	tags=43%, list=35%, signal=65%
MONOTERPENOID_BIOSYNTHESIS(ATH00902)	MONOTERPENOID_BIOSYNTHESIS(ATH00902)	Details ...	22	0.445036	1.01339	0.283525	0.63731	1	7902	tags=55%, list=30%, signal=78%
DNA_REPLICATION(ATH03030)	DNA_REPLICATION(ATH03030)	Details ...	52	0.439458	1.0122	0.397917	0.627043	1	8888	tags=63%, list=34%, signal=96%
UBIQUITIN_MEDIATED_PROTEOLYSIS(ATH04120)	UBIQUITIN_MEDIATED_PROTEOLYSIS(ATH04120)	Details ...	157	0.177237	0.986419	0.474609	0.655566	1	6522	tags=24%, list=25%, signal=32%
RIBOFLAVIN_METABOLISM(ATH00740)	RIBOFLAVIN_METABOLISM(ATH00740)	Details ...	26	0.29012	0.971243	0.582305	0.671089	1	6949	tags=42%, list=26%, signal=57%
ALANINE__ASPARTATE_AND_GLUTAMATE_METABOLISM(ATH00250)	ALANINE__ASPARTATE_AND_GLUTAMATE_METABOLISM(ATH00250)	Details ...	61	0.257494	0.967638	0.373196	0.662699	1	2964	tags=20%, list=11%, signal=22%
PURINE_METABOLISM(ATH00230)	PURINE_METABOLISM(ATH00230)		104	0.194915	0.930603	0.550209	0.700422	1	2258	tags=13%, list=9%, signal=15%
BIOTIN_METABOLISM(ATH00780)	BIOTIN_METABOLISM(ATH00780)		22	0.247928	0.91015	0.692453	0.71541	1	8375	tags=45%, list=32%, signal=67%
PENTOSE_AND_GLUCURONATE_INTERCONVERSIONS(ATH00040)	PENTOSE_AND_GLUCURONATE_INTERCONVERSIONS(ATH00040)		63	0.247474	0.894475	0.589322	0.728653	1	4336	tags=24%, list=17%, signal=28%
NUCLEOCYTOPLASMIC_TRANSPORT(ATH03013)	NUCLEOCYTOPLASMIC_TRANSPORT(ATH03013)		153	0.175125	0.886429	0.574181	0.725345	1	8527	tags=34%, list=32%, signal=50%
NUCLEOTIDE_METABOLISM(ATH01232)	NUCLEOTIDE_METABOLISM(ATH01232)		104	0.189611	0.879235	0.582121	0.721877	1	7118	tags=34%, list=27%, signal=46%
GLUCOSINOLATE_BIOSYNTHESIS(ATH00966)	GLUCOSINOLATE_BIOSYNTHESIS(ATH00966)		24	0.358222	0.864783	0.679175	0.727053	1	4668	tags=25%, list=18%, signal=30%
GLUTATHIONE_METABOLISM(ATH00480)	GLUTATHIONE_METABOLISM(ATH00480)		129	0.284197	0.861818	0.669829	0.720035	1	7173	tags=42%, list=27%, signal=57%
FATTY_ACID_METABOLISM(ATH01212)	FATTY_ACID_METABOLISM(ATH01212)		94	0.187486	0.837619	0.781369	0.743554	1	5902	tags=22%, list=22%, signal=29%
ONE_CARBON_POOL_BY_FOLATE(ATH00670)	ONE_CARBON_POOL_BY_FOLATE(ATH00670)		29	0.237628	0.80198	0.69958	0.786128	1	3983	tags=24%, list=15%, signal=28%
VITAMIN_B6_METABOLISM(ATH00750)	VITAMIN_B6_METABOLISM(ATH00750)		21	0.24828	0.734435	0.687861	0.848249	1	5884	tags=38%, list=22%, signal=49%
AUTOPHAGY___OTHER(ATH04136)	AUTOPHAGY___OTHER(ATH04136)		43	0.168071	0.724103	0.882353	0.845931	1	8423	tags=35%, list=32%, signal=51%
OTHER_GLYCAN_DEGRADATION(ATH00511)	OTHER_GLYCAN_DEGRADATION(ATH00511)		27	0.128084	0.399146	0.885932	0.995804	1	8745	tags=33%, list=33%, signal=50%
