# Supplementary material for: Molecular Mechanisms of Chlorophyll Deficiency in Ilex × attenuata ‘Sunny Foster’ Mutant
Source: Plants (Basel). 2024 May 7;13(10):1284. doi: 10.3390/plants13101284 (PMC11124982; doi:10.3390/plants13101284)
Supplement: Supplementary file 1 [file plants-13-01284-s001.zip › Table S7 Genes with high GSEA enrichment in porphorin matabolism in YT..xls]

## Sheet: Porphyrin Metabolism (ATH00860)
Gene ID	Rank Metric Score	Running ES	Core Enrichment	Gene Name	Gene Description	YTvsWT_log2FoldChange	YTvsWT_padj
Ila13G013520	0.858908	0.63443	Yes	HY2	phytochromobilin:ferredoxin oxidoreductase	0.501159	0.0712157
Ila12G005440	0.891791	0.631013	Yes	CHLP	Geranylgeranyl diphosphate reductase	0.520204	0.022878
Ila11G007930	0.986772	0.627892	Yes	CLH2	Chlorophyllase-2	0.57776	0.00165172
Ila19G001260	0.930502	0.627854	Yes	CHLG	Chlorophyll synthase	0.546096	0.0113457
novel.471	1.00194	0.617998	Yes	COX10	heme o synthase	0.626648	0.139646
Ila17G014170	1.05627	0.615272	Yes	CHLP	Geranylgeranyl diphosphate reductase	2.86134	1
Ila20G010460	1.22865	0.612464	Yes	PORA	Protochlorophyllide reductase	0.724004	0.000130279
Ila14G000520	1.09612	0.608212	Yes	PPOX	Protoporphyrinogen oxidase	0.643232	7.06098e-05
Ila0G007150	1.31463	0.606209	Yes	PPOX1	Protoporphyrinogen oxidase 1	0.777893	0.000599782
Ila09G004090	1.31573	0.589213	Yes	PPOX1	Protoporphyrinogen oxidase 1	0.777872	0.000128086
Ila11G005050	1.37502	0.578196	Yes	HCAR	7-hydroxymethyl chlorophyll a reductase	0.814788	8.31349e-06
Ila15G012840	1.42759	0.565032	Yes	HEMF	Coproporphyrinogen III oxidase	0.847505	1.95266e-06
Ila13G000070	1.49596	0.552479	Yes	PPOX	Protoporphyrinogen oxidase	0.890712	3.80669e-06
Ila18G007640	1.51238	0.53434	Yes	NOL	Chlorophyll(ide) b reductase	0.901579	4.87877e-05
Ila11G009290	1.67748	0.526597	Yes	DVR	Divinyl chlorophyllide a 8-vinyl-reductase	1.24046	1.73312e-06
Ila05G007280	1.89127	0.515365	Yes	HEMB1	Delta-aminolevulinic acid dehydratase 1	1.17007	4.43427e-09
Ila20G005240	1.92844	0.492223	Yes	HEME1	Uroporphyrinogen decarboxylase 1	1.17406	6.0092e-10
Ila02G000680	1.99272	0.469816	Yes	GSA	Glutamate-1-semialdehyde 2,1-aminomutase	1.2175	7.56631e-16
Ila05G008140	2.03931	0.445236	Yes	SGR	Magnesium dechelatase	1.24768	2.45315e-05
Ila05G008020	2.06964	0.419628	Yes	SGR	Magnesium dechelatase	1.35571	7.27773e-06
Ila10G009360	2.17404	0.39557	Yes	HEMB1	Delta-aminolevulinic acid dehydratase 1	1.34419	9.11874e-17
Ila15G019570	2.26218	0.369235	Yes	CHLI	Magnesium-chelatase subunit ChlI	1.40746	1.1489e-15
Ila04G007000	2.40348	0.342629	Yes	HEME	Uroporphyrinogen decarboxylase	1.51173	1.15047e-15
Ila02G001080	2.4315	0.311736	Yes	CHLM	Magnesium protoporphyrin IX methyltransferase	1.53283	4.42342e-16
Ila09G012370	2.57132	0.282119	Yes	CHLD	Magnesium-chelatase subunit ChlD	1.64064	1.93408e-20
Ila12G008730	2.78458	0.251136	Yes	GSA	Glutamate-1-semialdehyde 2,1-aminomutase	2.11334	1.25507e-12
Ila17G000450	2.95638	0.215883	Yes	HEMC	Porphobilinogen deaminase	1.96174	5.02748e-28
Ila20G000460	2.97299	0.177473	Yes	HEMC	Porphobilinogen deaminase	1.97609	1.04183e-24
Ila17G009680	3.50336	0.140411	Yes	PORA	Protochlorophyllide reductase	2.583	1.80668e-36
Ila20G004240	3.56411	0.0947903	Yes	PORA	Protochlorophyllide reductase	3.06987	1.06239e-14
Ila20G003850	3.77608	0.0486058	Yes	PORA	Protochlorophyllide reductase	3.20305	4.37863e-09
