# Supplementary material for: Molecular Mechanisms of Chlorophyll Deficiency in Ilex × attenuata ‘Sunny Foster’ Mutant
Source: Plants (Basel). 2024 May 7;13(10):1284. doi: 10.3390/plants13101284 (PMC11124982; doi:10.3390/plants13101284)
Supplement: Supplementary file 1 [file plants-13-01284-s001.zip › Table S8 Differential expression of TFs..xls]

## Sheet: TFs
Gene ID	TF_family	Number	YTvsWT log2FC	Padj	Regulated
Ila19G001110	bHLH	29	-5.14264	3.20617e-07	Down_regulated
Ila07G002100	bHLH	29	-3.7281	3.34358e-05	Down_regulated
Ila14G023280	bHLH	29	-3.58134	0.000486431	Down_regulated
Ila02G009960	bHLH	29	-3.4035	1.07781e-15	Down_regulated
Ila03G002040	bHLH	29	-3.22092	0.000679998	Down_regulated
Ila02G009970	bHLH	29	-3.18498	7.71288e-23	Down_regulated
Ila01G004100	bHLH	29	-3.08578	5.6869e-06	Down_regulated
Ila14G009770	bHLH	29	-2.90475	3.19133e-05	Down_regulated
Ila10G001950	bHLH	29	-2.72225	1.52519e-06	Down_regulated
Ila16G011480	bHLH	29	-2.67643	4.79726e-05	Down_regulated
Ila09G013280	bHLH	29	-2.5363	2.27279e-07	Down_regulated
Ila17G023940	bHLH	29	-2.44031	4.42301e-06	Down_regulated
Ila03G006680	bHLH	29	-2.4278	0.000226122	Down_regulated
Ila10G001220	bHLH	29	-2.33801	1.45689e-10	Down_regulated
Ila14G023700	bHLH	29	-2.12372	5.47729e-13	Down_regulated
Ila10G002230	bHLH	29	-2.09101	4.28218e-12	Down_regulated
Ila17G023390	bHLH	29	2.14261	0.000962895	Up_regulated
Ila19G006440	bHLH	29	2.18515	3.03325e-09	Up_regulated
Ila02G005680	bHLH	29	2.18566	3.86404e-18	Up_regulated
Ila20G004680	bHLH	29	2.19376	3.82934e-13	Up_regulated
Ila09G001330	bHLH	29	2.19399	0.000133956	Up_regulated
Ila08G010280	bHLH	29	2.27066	0.000388052	Up_regulated
Ila04G001460	bHLH	29	2.33054	7.554e-27	Up_regulated
Ila15G001030	bHLH	29	2.63696	1.07781e-15	Up_regulated
Ila06G002900	bHLH	29	3.14734	1.42013e-05	Up_regulated
Ila06G003810	bHLH	29	3.2824	3.70873e-06	Up_regulated
Ila0G015280	bHLH	29	3.48082	0.00074037	Up_regulated
Ila15G011330	bHLH	29	6.16249	1.54069e-10	Up_regulated
Ila02G010950	bHLH	29	8.62631	7.45788e-10	Up_regulated
Ila09G016290	ERF	26	-4.64693	1.89324e-10	Down_regulated
Ila17G021150	ERF	26	-4.59269	8.21281e-05	Down_regulated
Ila13G007870	ERF	26	-3.27267	4.52477e-10	Down_regulated
Ila05G011130	ERF	26	-2.98565	6.70969e-06	Down_regulated
Ila10G007340	ERF	26	-2.79542	0.000324943	Down_regulated
Ila19G002940	ERF	26	-2.73979	2.30183e-05	Down_regulated
Ila03G012780	ERF	26	-2.64889	0.000226937	Down_regulated
Ila20G008530	ERF	26	-2.53544	7.1934e-05	Down_regulated
Ila10G000820	ERF	26	-2.4078	6.40845e-36	Down_regulated
Ila10G007230	ERF	26	-2.40706	0.000419194	Down_regulated
Ila05G009640	ERF	26	-2.37455	0.000114995	Down_regulated
Ila09G011830	ERF	26	-2.26138	1.9224e-06	Down_regulated
Ila10G006310	ERF	26	-2.21411	4.9649e-06	Down_regulated
Ila10G006340	ERF	26	-2.20837	6.55086e-08	Down_regulated
Ila08G011330	ERF	26	-2.20649	3.84611e-07	Down_regulated
Ila19G000070	ERF	26	-2.11308	3.13453e-10	Down_regulated
Ila03G008610	ERF	26	-2.09287	1.64935e-12	Down_regulated
Ila08G012690	ERF	26	-2.05915	1.90791e-08	Down_regulated
Ila14G006580	ERF	26	-2.04833	3.60336e-17	Down_regulated
Ila10G005130	ERF	26	-2.04638	3.47171e-28	Down_regulated
Ila08G007400	ERF	26	2.13568	6.76696e-13	Up_regulated
Ila05G001620	ERF	26	3.67603	6.96933e-10	Up_regulated
Ila01G002300	ERF	26	3.68172	1.34759e-06	Up_regulated
Ila17G021280	ERF	26	3.68898	1.32182e-05	Up_regulated
Ila16G000600	ERF	26	4.59009	1.44637e-22	Up_regulated
Ila14G019570	ERF	26	5.56363	0.000418052	Up_regulated
Ila06G012090	NAC	22	-3.81864	1.47359e-07	Down_regulated
Ila08G001020	NAC	22	-3.23748	5.58138e-42	Down_regulated
Ila01G001060	NAC	22	-2.9927	4.53818e-15	Down_regulated
Ila09G002820	NAC	22	-2.82356	5.27503e-05	Down_regulated
Ila03G006770	NAC	22	-2.54423	4.28271e-17	Down_regulated
Ila0G017360	NAC	22	-2.51202	6.91931e-05	Down_regulated
Ila09G000400	NAC	22	-2.4099	8.50577e-10	Down_regulated
Ila17G011980	NAC	22	-2.36514	0.00044042	Down_regulated
Ila17G021220	NAC	22	-2.35773	5.49768e-08	Down_regulated
Ila16G014400	NAC	22	-2.34652	1.94146e-06	Down_regulated
Ila16G010140	NAC	22	-2.24559	0.000109002	Down_regulated
Ila11G006010	NAC	22	-2.18963	1.64935e-12	Down_regulated
Ila08G007600	NAC	22	-2.08369	0.000119396	Down_regulated
Ila15G006400	NAC	22	-2.05157	5.58432e-10	Down_regulated
Ila08G008920	NAC	22	-2.04076	3.6038e-06	Down_regulated
Ila17G015870	NAC	22	-2.00916	1.80936e-05	Down_regulated
Ila14G016540	NAC	22	-2.00586	5.16486e-11	Down_regulated
Ila02G005980	NAC	22	2.0547	8.24614e-28	Up_regulated
Ila11G006340	NAC	22	2.16794	8.88069e-11	Up_regulated
Ila16G003610	NAC	22	2.45168	2.677e-06	Up_regulated
Ila06G001250	NAC	22	3.29425	1.18601e-10	Up_regulated
Ila15G020550	NAC	22	4.08381	2.65506e-33	Up_regulated
Ila06G007310	MYB_related	21	-7.19939	0.000524833	Down_regulated
Ila07G005720	MYB_related	21	-6.69389	4.63224e-05	Down_regulated
Ila14G018410	MYB_related	21	-3.93123	9.80251e-06	Down_regulated
Ila10G008880	MYB_related	21	-3.55654	0.000169916	Down_regulated
Ila18G019020	MYB_related	21	-3.4252	2.43755e-10	Down_regulated
Ila19G000870	MYB_related	21	-3.1357	9.70383e-09	Down_regulated
Ila15G008350	MYB_related	21	-2.53098	1.63861e-11	Down_regulated
Ila15G021120	MYB_related	21	-2.49378	7.71562e-06	Down_regulated
Ila13G002120	MYB_related	21	-2.44211	1.96541e-14	Down_regulated
Ila13G010910	MYB_related	21	-2.43452	3.0069e-07	Down_regulated
Ila10G008340	MYB_related	21	-2.38346	1.75852e-05	Down_regulated
Ila06G008290	MYB_related	21	-2.247	1.3934e-16	Down_regulated
Ila03G003280	MYB_related	21	-2.23355	5.72368e-06	Down_regulated
Ila01G004330	MYB_related	21	-2.2083	7.71288e-23	Down_regulated
Ila09G004250	MYB_related	21	-2.13089	0.000922236	Down_regulated
Ila03G000910	MYB_related	21	-2.1025	0.000198658	Down_regulated
Ila20G002390	MYB_related	21	2.04306	2.14308e-33	Up_regulated
Ila12G008730	MYB_related	21	2.11334	1.25507e-12	Up_regulated
Ila05G003170	MYB_related	21	2.60107	2.60997e-15	Up_regulated
Ila14G006980	MYB_related	21	2.64235	5.87503e-11	Up_regulated
Ila04G010800	MYB_related	21	3.2658	2.10278e-05	Up_regulated
Ila05G008580	MYB	18	-5.90907	0.000468042	Down_regulated
Ila05G008600	MYB	18	-4.22236	1.94339e-09	Down_regulated
Ila01G005840	MYB	18	-3.1385	1.06546e-16	Down_regulated
Ila02G010130	MYB	18	-2.8348	0.000205167	Down_regulated
Ila03G012520	MYB	18	-2.58003	0.000698505	Down_regulated
Ila12G013340	MYB	18	-2.29993	2.10721e-21	Down_regulated
Ila13G014330	MYB	18	-2.25553	1.96972e-05	Down_regulated
Ila19G003070	MYB	18	-2.08993	0.000213104	Down_regulated
Ila13G014060	MYB	18	-2.08305	2.13618e-09	Down_regulated
Ila09G016980	MYB	18	-2.0756	1.53504e-07	Down_regulated
Ila16G002390	MYB	18	-2.00853	0.000785327	Down_regulated
Ila08G010210	MYB	18	2.06063	0.000784038	Up_regulated
Ila16G018180	MYB	18	2.50776	1.62948e-22	Up_regulated
Ila16G018160	MYB	18	2.62451	8.08775e-13	Up_regulated
Ila03G011560	MYB	18	2.65642	8.78492e-06	Up_regulated
Ila03G011310	MYB	18	2.70899	3.75626e-07	Up_regulated
Ila18G005210	MYB	18	4.37707	2.89568e-09	Up_regulated
Ila20G009710	MYB	18	4.64192	4.12799e-20	Up_regulated
Ila08G002610	G2-like	17	-5.92132	0.000214637	Down_regulated
Ila01G004660	G2-like	17	-3.49366	7.11063e-07	Down_regulated
Ila10G008250	G2-like	17	-3.35724	3.3519e-12	Down_regulated
Ila18G004940	G2-like	17	-3.2977	3.79552e-05	Down_regulated
Ila03G001660	G2-like	17	-2.98209	0.000439141	Down_regulated
Ila15G006730	G2-like	17	-2.90471	1.27559e-06	Down_regulated
Ila0G014180	G2-like	17	-2.89637	2.03047e-15	Down_regulated
Ila10G008280	G2-like	17	-2.89209	4.90122e-15	Down_regulated
Ila03G008530	G2-like	17	-2.83602	5.20736e-08	Down_regulated
Ila0G019680	G2-like	17	-2.74757	4.07584e-06	Down_regulated
Ila05G013790	G2-like	17	-2.7455	0.000734599	Down_regulated
Ila15G020840	G2-like	17	-2.4649	4.34636e-08	Down_regulated
Ila20G011400	G2-like	17	-2.13761	4.2628e-30	Down_regulated
Ila13G008940	G2-like	17	2.26249	8.17952e-08	Up_regulated
Ila13G006710	G2-like	17	2.61388	1.1305e-25	Up_regulated
Ila06G007530	G2-like	17	2.65507	1.84262e-05	Up_regulated
Ila04G002630	G2-like	17	7.7297	4.647e-08	Up_regulated
Ila06G009770	C2H2	16	-4.65118	0.000127493	Down_regulated
Ila10G005460	C2H2	16	-3.50514	4.34636e-08	Down_regulated
Ila03G002590	C2H2	16	-2.55152	0.000135955	Down_regulated
Ila02G008940	C2H2	16	-2.54488	2.52922e-09	Down_regulated
Ila05G015310	C2H2	16	-2.52682	2.91816e-29	Down_regulated
Ila20G000470	C2H2	16	-2.16372	5.80263e-07	Down_regulated
Ila20G003040	C2H2	16	-2.08026	8.93689e-12	Down_regulated
Ila0G011190	C2H2	16	2.06167	6.4805e-07	Up_regulated
Ila05G004990	C2H2	16	2.25536	1.69659e-10	Up_regulated
Ila17G009680	C2H2	16	2.583	1.80668e-36	Up_regulated
Ila0G008580	C2H2	16	2.96247	0.000523232	Up_regulated
Ila20G004240	C2H2	16	3.06987	1.06239e-14	Up_regulated
Ila19G006040	C2H2	16	3.13245	6.01398e-06	Up_regulated
Ila20G003850	C2H2	16	3.20305	4.37863e-09	Up_regulated
Ila16G021890	C2H2	16	4.51919	9.85e-05	Up_regulated
Ila10G001250	C2H2	16	6.27551	0.000133486	Up_regulated
Ila17G021790	FAR1	15	-2.72505	3.20617e-07	Down_regulated
Ila15G006460	FAR1	15	-2.5373	1.30673e-20	Down_regulated
Ila01G000130	FAR1	15	-2.49275	2.03766e-20	Down_regulated
Ila17G021840	FAR1	15	-2.27615	3.55034e-06	Down_regulated
Ila08G006990	FAR1	15	-2.1535	2.59456e-05	Down_regulated
Ila13G013870	FAR1	15	-2.12972	3.64839e-07	Down_regulated
Ila13G013810	FAR1	15	-2.0904	2.17591e-05	Down_regulated
Ila18G014030	FAR1	15	2.17256	4.01883e-07	Up_regulated
Ila13G002420	FAR1	15	2.24827	0.000253746	Up_regulated
Ila08G001290	FAR1	15	2.4898	0.000782015	Up_regulated
Ila09G010060	FAR1	15	2.49756	1.11448e-05	Up_regulated
Ila11G008740	FAR1	15	2.92528	0.000190866	Up_regulated
novel.231	FAR1	15	3.57902	3.41535e-16	Up_regulated
Ila0G003340	FAR1	15	4.60524	3.07273e-07	Up_regulated
Ila03G009570	FAR1	15	7.09088	1.28216e-05	Up_regulated
Ila04G002210	WRKY	13	-4.27235	7.88437e-06	Down_regulated
Ila01G006860	WRKY	13	-3.59777	1.83903e-06	Down_regulated
Ila04G006130	WRKY	13	-3.45617	0.000218534	Down_regulated
Ila03G000170	WRKY	13	-2.98114	2.21983e-12	Down_regulated
Ila12G006820	WRKY	13	-2.72233	1.7358e-05	Down_regulated
Ila16G005350	WRKY	13	-2.68612	1.20579e-05	Down_regulated
Ila15G011680	WRKY	13	-2.64462	9.03727e-05	Down_regulated
Ila10G008570	WRKY	13	-2.3905	0.000468042	Down_regulated
Ila10G008490	WRKY	13	-2.38	0.000358802	Down_regulated
Ila14G015250	WRKY	13	-2.32474	1.82377e-08	Down_regulated
Ila17G017250	WRKY	13	2.20293	3.70384e-09	Up_regulated
Ila13G010790	WRKY	13	2.20935	5.09069e-09	Up_regulated
Ila03G001510	WRKY	13	2.30265	2.28795e-08	Up_regulated
Ila0G007900	bZIP	10	-5.09703	0.000335172	Down_regulated
Ila14G017740	bZIP	10	-3.29288	2.52758e-06	Down_regulated
Ila05G005080	bZIP	10	-2.85533	7.6395e-05	Down_regulated
Ila09G008580	bZIP	10	-2.66849	6.39348e-06	Down_regulated
Ila20G011830	bZIP	10	-2.57424	3.60323e-06	Down_regulated
Ila15G019750	bZIP	10	-2.39871	9.7821e-05	Down_regulated
Ila18G011560	bZIP	10	-2.09384	4.49838e-07	Down_regulated
Ila11G010430	bZIP	10	3.21166	9.28865e-10	Up_regulated
Ila14G026160	bZIP	10	3.2845	1.95472e-68	Up_regulated
Ila16G022730	bZIP	10	3.86337	2.88632e-09	Up_regulated
Ila16G018230	C3H	10	-3.8782	2.90809e-17	Down_regulated
Ila08G011300	C3H	10	-3.65979	0.00011509	Down_regulated
Ila12G006080	C3H	10	-2.41278	1.09362e-10	Down_regulated
Ila07G008540	C3H	10	-2.39576	1.76947e-05	Down_regulated
Ila14G027050	C3H	10	-2.35322	5.38785e-20	Down_regulated
Ila17G016130	C3H	10	-2.26655	1.51268e-10	Down_regulated
Ila11G005430	C3H	10	-2.03355	1.84234e-11	Down_regulated
Ila03G011520	C3H	10	-2.01677	0.000285305	Down_regulated
Ila12G007440	C3H	10	2.16566	0.000111232	Up_regulated
Ila09G005760	C3H	10	3.03815	1.57667e-06	Up_regulated
Ila02G008620	B3	9	-5.13741	0.000598152	Down_regulated
Ila12G010180	B3	9	-4.36431	1.04518e-07	Down_regulated
Ila05G014870	B3	9	-2.64223	1.35553e-08	Down_regulated
Ila07G008070	B3	9	-2.12099	1.69855e-06	Down_regulated
Ila10G009540	B3	9	2.79367	8.30918e-14	Up_regulated
Ila0G002350	B3	9	2.93966	3.06514e-10	Up_regulated
Ila11G010070	B3	9	5.74951	5.37548e-09	Up_regulated
Ila13G006720	B3	9	6.10343	7.49616e-12	Up_regulated
Ila14G004470	B3	9	8.60454	4.01177e-21	Up_regulated
Ila06G005910	NF-YC	8	-2.40279	0.000855575	Down_regulated
Ila17G012070	NF-YC	8	-2.39973	1.1469e-07	Down_regulated
Ila14G013430	NF-YC	8	-2.02979	1.4569e-06	Down_regulated
Ila17G011300	NF-YC	8	4.2347	1.41343e-50	Up_regulated
Ila17G011510	NF-YC	8	4.70963	4.81986e-52	Up_regulated
Ila17G011540	NF-YC	8	5.20801	1.67791e-19	Up_regulated
Ila09G014250	NF-YC	8	6.43916	1.84834e-07	Up_regulated
Ila17G011480	NF-YC	8	8.99923	6.36298e-05	Up_regulated
Ila01G003170	Trihelix	8	-4.62586	0.000307309	Down_regulated
Ila15G010080	Trihelix	8	-3.10767	1.12508e-05	Down_regulated
Ila15G003290	Trihelix	8	-2.9985	0.000406295	Down_regulated
Ila03G002740	Trihelix	8	-2.55602	4.20653e-05	Down_regulated
Ila09G012120	Trihelix	8	-2.35946	2.77284e-05	Down_regulated
Ila16G017360	Trihelix	8	-2.24485	4.68351e-06	Down_regulated
Ila15G010040	Trihelix	8	-2.06452	2.77852e-08	Down_regulated
Ila05G014630	Trihelix	8	2.32754	7.5452e-08	Up_regulated
Ila01G000010	BES1	7	-3.30037	2.21011e-14	Down_regulated
Ila06G004770	BES1	7	-2.97854	0.000104795	Down_regulated
Ila02G002340	BES1	7	-2.59111	9.21845e-13	Down_regulated
Ila19G000860	BES1	7	-2.15737	2.35757e-07	Down_regulated
novel.1051	BES1	7	-2.13379	0.000361704	Down_regulated
Ila17G011220	BES1	7	2.5257	0.00026927	Up_regulated
Ila20G009020	BES1	7	3.2965	9.89319e-45	Up_regulated
Ila10G005890	GRAS	7	-3.93137	3.40804e-05	Down_regulated
Ila15G014460	GRAS	7	-2.21588	1.85302e-05	Down_regulated
Ila19G001590	GRAS	7	-2.14728	3.5666e-05	Down_regulated
Ila13G000590	GRAS	7	-2.14295	2.4795e-05	Down_regulated
Ila05G009870	GRAS	7	2.05657	2.86867e-06	Up_regulated
Ila15G010360	GRAS	7	2.32805	1.5975e-10	Up_regulated
Ila13G009030	GRAS	7	2.8254	0.00013611	Up_regulated
Ila15G023370	M-type_MADS	7	-4.61774	0.000456403	Down_regulated
Ila12G011110	M-type_MADS	7	-3.5695	0.000501844	Down_regulated
Ila12G007210	M-type_MADS	7	-2.37771	4.47726e-22	Down_regulated
Ila17G006450	M-type_MADS	7	-2.03051	6.88011e-09	Down_regulated
Ila0G015020	M-type_MADS	7	2.07139	1.867e-11	Up_regulated
Ila14G003920	M-type_MADS	7	2.40405	3.44543e-06	Up_regulated
Ila18G005910	M-type_MADS	7	3.57609	2.54386e-12	Up_regulated
Ila14G022780	LBD	5	-2.60728	1.90923e-05	Down_regulated
Ila04G006540	LBD	5	-2.2529	0.000168067	Down_regulated
Ila19G009280	LBD	5	-2.0309	2.43943e-07	Down_regulated
Ila17G001090	LBD	5	2.25756	0.000104532	Up_regulated
Ila02G010860	LBD	5	2.55404	0.000114309	Up_regulated
Ila19G002170	NF-YB	5	-2.65012	1.0337e-12	Down_regulated
Ila18G017110	NF-YB	5	-2.37114	0.000698822	Down_regulated
Ila06G010650	NF-YB	5	2.43648	4.44358e-32	Up_regulated
Ila17G018150	NF-YB	5	2.80039	2.32796e-07	Up_regulated
Ila15G011660	NF-YB	5	3.36232	3.72717e-42	Up_regulated
Ila18G000100	CPP	4	-2.70046	7.89229e-06	Down_regulated
Ila14G007020	CPP	4	-2.09389	2.87793e-08	Down_regulated
Ila02G002510	CPP	4	2.08758	0.000163968	Up_regulated
Ila01G004530	CPP	4	4.77054	2.36814e-08	Up_regulated
Ila16G007830	DBB	4	-2.24021	0.000324883	Down_regulated
Ila14G026650	DBB	4	-2.01337	2.89658e-11	Down_regulated
Ila10G003400	DBB	4	2.28943	2.67645e-09	Up_regulated
Ila05G008400	DBB	4	5.76516	0.000974667	Up_regulated
Ila09G012110	GATA	4	2.00658	4.09954e-17	Up_regulated
Ila13G013230	GATA	4	2.11394	1.94146e-06	Up_regulated
Ila13G013220	GATA	4	2.12802	0.000623638	Up_regulated
Ila12G009700	GATA	4	3.08893	2.90362e-08	Up_regulated
Ila16G002080	GeBP	4	-2.64707	7.27786e-10	Down_regulated
Ila0G006240	GeBP	4	2.88251	9.47998e-20	Up_regulated
Ila12G008740	GeBP	4	2.94541	2.99292e-10	Up_regulated
Ila15G002440	GeBP	4	3.29756	0.000857062	Up_regulated
Ila0G004230	MIKC_MADS	4	-2.35658	8.5973e-06	Down_regulated
Ila0G005400	MIKC_MADS	4	-2.24261	1.83786e-05	Down_regulated
Ila11G001690	MIKC_MADS	4	3.43772	1.91277e-23	Up_regulated
Ila11G001700	MIKC_MADS	4	3.56903	5.86429e-20	Up_regulated
Ila14G026950	S1Fa-like	4	-2.56795	7.67926e-23	Down_regulated
Ila14G006940	S1Fa-like	4	-2.3543	0.000324943	Down_regulated
Ila07G001370	S1Fa-like	4	-2.32603	0.000341333	Down_regulated
Ila17G013820	S1Fa-like	4	2.34721	1.41561e-12	Up_regulated
Ila14G022400	ARF	3	-3.27591	1.2918e-29	Down_regulated
Ila11G006470	ARF	3	-3.15354	1.22921e-39	Down_regulated
Ila05G014810	ARF	3	-2.83198	3.76346e-05	Down_regulated
Ila11G006300	Dof	3	2.42804	0.000287948	Up_regulated
Ila06G014970	Dof	3	2.53337	0.000242773	Up_regulated
Ila17G002260	Dof	3	3.22105	0.000269923	Up_regulated
Ila07G011020	HSF	3	-3.28103	1.39389e-05	Down_regulated
Ila17G006360	HSF	3	-2.29137	3.6411e-06	Down_regulated
Ila20G011640	HSF	3	2.38884	3.53398e-19	Up_regulated
Ila02G000550	Nin-like	3	-5.25096	3.32725e-05	Down_regulated
Ila06G000620	Nin-like	3	2.42467	2.2268e-22	Up_regulated
Ila04G009490	Nin-like	3	3.65915	0.000663087	Up_regulated
Ila19G010670	SBP	3	-2.07272	1.85545e-08	Down_regulated
Ila18G003610	SBP	3	2.15293	9.75e-05	Up_regulated
Ila05G002290	SBP	3	3.0193	0.000982813	Up_regulated
Ila05G010840	STAT	3	-2.80482	1.04768e-05	Down_regulated
Ila12G007810	STAT	3	-2.57966	2.595e-13	Down_regulated
Ila16G019840	STAT	3	-2.57305	6.32142e-11	Down_regulated
Ila0G005340	WOX	3	-4.25963	8.49755e-08	Down_regulated
Ila07G005050	WOX	3	-4.21476	0.000341621	Down_regulated
Ila02G009690	WOX	3	-2.03354	3.03749e-05	Down_regulated
Ila15G002090	HD-ZIP	2	-4.51244	4.21393e-42	Down_regulated
Ila16G017620	HD-ZIP	2	2.76342	9.64101e-06	Up_regulated
Ila14G021530	TALE	2	-5.50319	7.30653e-06	Down_regulated
Ila15G010730	TALE	2	-2.10652	0.00081896	Down_regulated
Ila06G009780	CAMTA	1	-3.71665	4.19737e-07	Down_regulated
Ila17G006880	E2F/DP	1	-3.02877	3.89297e-06	Down_regulated
Ila19G012020	HB-other	1	-2.77488	1.34766e-05	Down_regulated
Ila11G009310	LSD	1	-2.661	1.80094e-07	Down_regulated
Ila19G003450	NF-YA	1	-3.17601	8.41742e-10	Down_regulated
Ila03G008890	RAV	1	2.8744	0.000131961	Up_regulated
Ila15G003430	TCP	1	-2.12214	1.042e-08	Down_regulated
Ila18G003080	YABBY	1	-2.08396	0.000117283	Down_regulated
Ila0G015000	ZF-HD	1	3.24482	1.05265e-08	Up_regulated
